# Supplementary material for: Nickel-catalysed enantioselective cross-electrophile coupling reaction with the retention of the β-fluorine atom
Source: Royal Society of Chemistry journal article supplement (doi:10.1039/d4qo01555j), 2024-01-01
Supplement: d4qo01555j1.pdf [file d4qo01555j1.pdf]

# Electronic Supplementary Information (ESI)

## Nickel-catalysed enantioselective cross- electrophile coupling reaction with the retention of $\beta$ -fluorine atom

Xin-Yi Shi,<sup>†</sup> Xueyuan Yan,<sup>†</sup> Xiaodong Tang, Shi-Jing Zhai,  
Genping Huang, Jun-An Ma, and Fa-Guang Zhang\*

---

*Department of Chemistry, Tianjin Key Laboratory of Molecular Optoelectronic Sciences,  
Frontiers Science Center for Synthetic Biology (Ministry of Education), Tianjin University,  
Tianjin 300072, P. R. of China.*

\*Email: zhangfg1987@tju.edu.cn (F.G.Z.)

<sup>†</sup>These authors contributed equally: Xin-Yi Shi, Xueyuan Yan.

## Contents

|            |                                                                    |            |
|------------|--------------------------------------------------------------------|------------|
| <b>1</b>   | <b>General Information</b> .....                                   | <b>3</b>   |
| <b>2</b>   | <b>Synthesis of Brominated Fluoroethanol Benzoate (BFEB)</b> ..... | <b>4</b>   |
| <b>3</b>   | <b>Other Optimization</b> .....                                    | <b>6</b>   |
| <b>4</b>   | <b>General Procedure for Synthesis of Products 2</b> .....         | <b>7</b>   |
| <b>5</b>   | <b>Characterization Data for New Compounds</b> .....               | <b>8</b>   |
| <b>6</b>   | <b>Gram-Scale Reaction</b> .....                                   | <b>28</b>  |
| <b>7</b>   | <b>Synthesis Transformation</b> .....                              | <b>29</b>  |
| <b>7.1</b> | <b>Reduction of ketone group</b> .....                             | <b>29</b>  |
| <b>7.2</b> | <b>Wittig reaction</b> .....                                       | <b>31</b>  |
| <b>7.3</b> | <b>Baeyer-Villiger oxidation</b> .....                             | <b>32</b>  |
| <b>8</b>   | <b>Mechanistic Studies</b> .....                                   | <b>34</b>  |
| <b>8.1</b> | <b>Radical Trapping Experiment</b> .....                           | <b>34</b>  |
| <b>8.2</b> | <b>EPR Experiment</b> .....                                        | <b>36</b>  |
| <b>8.3</b> | <b>Stoichiometric reaction</b> .....                               | <b>39</b>  |
| <b>8.4</b> | <b>Ligand effect and side-products examination</b> .....           | <b>40</b>  |
| <b>8.5</b> | <b>Probing the kinetic resolution of starting material</b> .....   | <b>41</b>  |
| <b>8.6</b> | <b>Comparing experiments with various acyl donors</b> .....        | <b>42</b>  |
| <b>8.7</b> | <b>Nonlinear Effect Study</b> .....                                | <b>43</b>  |
| <b>9</b>   | <b>References</b> .....                                            | <b>45</b>  |
| <b>10</b>  | <b>NMR spectra of the related compound</b> .....                   | <b>46</b>  |
| <b>11</b>  | <b>HPLC charts of the related compounds</b> .....                  | <b>105</b> |
| <b>12</b>  | <b>X-Ray Crystallographic Data</b> .....                           | <b>124</b> |
| <b>13</b>  | <b>Computational Results</b> .....                                 | <b>128</b> |

## 1 General Information

$^1\text{H}$ ,  $^{13}\text{C}$  and  $^{19}\text{F}$  NMR spectra were recorded on Bruker AV 400 MHz instrument at 400 MHz ( $^1\text{H}$  NMR), 101 MHz ( $^{13}\text{C}$  NMR), and 376 MHz ( $^{19}\text{F}$  NMR), or Bruker AV 500 MHz instrument at 500 MHz ( $^1\text{H}$  NMR), 126 MHz ( $^{13}\text{C}$  NMR), 470 MHz ( $^{19}\text{F}$  NMR). Chemical shifts were reported in ppm downfield from internal  $\text{Me}_4\text{Si}$  and external  $\text{CHCl}_3$ , respectively. Multiplicity was indicated as follows: s (singlet), d (doublet), t (triplet), q (quartet), qu (quintet), sex (sextet), sep (septet), m (multiplet), dd (doublet of doublet), and br (broad signal). Coupling constants were reported in Hertz (Hz). High resolution mass spectrometry (HRMS) spectra were obtained on a Bruker miorOTOF-QII instrument. Optical rotations were determined using an Autopol IV-T. HPLC analyses were carried out on Shimadzu Model LC-2030C 3D instrument or Shimadzu DGU-20A and was performed with Chiralpak® column (4.6 mm  $\times$  250 mm  $\times$  5  $\mu\text{m}$ ) using a Shimadzu HPLC system and was monitored using a UV-detector. X-ray structural analysis was conducted on the Bruker APEX-II CCD instrument.

**Materials:** Tetrahydrofuran (THF) was distilled from sodium/benzophenone prior to use;  $\text{CH}_2\text{Cl}_2$  was distilled from calcium hydride. All purchased reagents were used without further purification. Thin-layer chromatography (TLC) was performed on precoated GF254 silica gel plates (Qingdao Marine Chemical Inc.) and compounds were visualized with a UV light at 254 nm. Flash chromatography separations were carried out using silica gel (200–300 mesh, Qingdao Marine Chemical Inc). The chiral ligands and the acid chlorides used in this study were purchased from commercial suppliers and used without further purification or were synthesized by ourselves from the reported literature.<sup>[1-3]</sup> Other reagents used in this study were purchased from commercial suppliers and used without further purification.

## 2 Synthesis of Brominated Fluoroethanol Benzoate (BFEB)

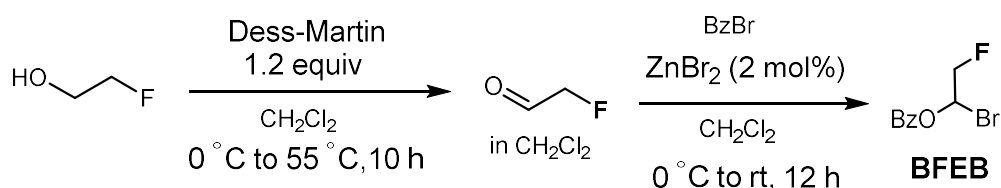

Dess-Martin reagent (30.54 g, 72 mmol, 1.2 equiv.) and DCM (150 mL) were added to a 250 mL Schlenk bottle containing a magnetic stirrer. The Schlenk bottle was placed in an ice water bath at 0 °C, the 2-fluoroethanol (3.84 g, 60 mmol, 1 equiv.) was slowly added while stirring. The reaction was stirred for 1 hour until the system turns milky white. Then the temperature of the system was raised to room temperature, and stirred for 9 hours. Then the temperature of the system was raised to 55 °C and reacted for 10 h. The DCM solution of fluoroacetaldehyde was obtained by low-temperature condensation at -17 °C and atmospheric distillation. Using trifluoromethoxybenzene as the internal standard, the concentration of fluoroacetaldehyde was determined by <sup>19</sup>F-NMR (0.45 mol/L).

In a glove box, anhydrous zinc bromide (135.1 mg, 0.6 mmol, 0.02 equiv.) and DCM solvent (30 mL) were added to a 250 mL Schlenk bottle containing a magnetic stirrer, Then benzoyl bromide (5.55 g, 30 mmol, 1 equiv.) was added, and the system was sealed. The DCM solution of fluoroacetaldehyde (45 mmol, 1.5 equiv, DCM solution) was slowly add to the system under stirring conditions at 0 °C. Then the system was stirred at room temperature for 12 hours. The mixture was passed through a short column of diatomaceous earth to remove the inorganic salts. After evaporation under reduced pressure to remove the solvent, the residue was purified by flash chromatography on silica gel (PE : EA = 40: 1) to afford the brominated fluoroethanol benzoate (**BFEB**) (5.93 g, 80% yield). The reagent has stable properties and can be stored at room temperature for several months.

## Brominated fluoroethanol benzoate (BFEB)

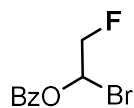

**BFEB** 5.93 g, 80% yield, PE : EA = 40: 1. White solid; m.p.: 65-66 °C; **<sup>1</sup>H NMR** (400 MHz, CDCl<sub>3</sub>) δ 8.13 – 8.06 (m, 2H), 7.63 (t, *J* = 7.5 Hz, 1H), 7.48 (t, *J* = 7.8 Hz, 2H), 7.00 (ddd, *J* = 11.0, 8.0, 3.1 Hz, 1H), 4.95 – 4.68 (m, 2H). **<sup>19</sup>F NMR** (376 MHz, Chloroform-*d*) δ -208.84 (td, *J* = 46.8, 10.3 Hz). **<sup>13</sup>C NMR** (101 MHz, CDCl<sub>3</sub>) δ 164.1, 134.3, 130.3, 128.8, 128.4, 83.1 (d, *J* = 182.9 Hz), 70.9 (d, *J* = 23.6 Hz); **HRMS** (ESI) *m/z* calcd. for C<sub>9</sub>H<sub>8</sub>BrO<sub>2</sub>FNa ([M+Na]<sup>+</sup>): 270.0526, found 270.0530.

### 3 Selected reaction optimizations

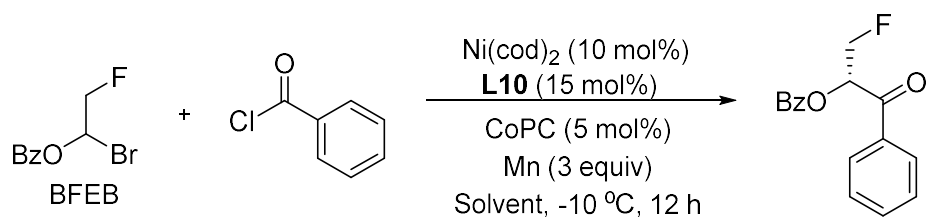

| Entry | Solvent            | Yield (%) | ee (%) |
|-------|--------------------|-----------|--------|
| 1     | DME                | trace     | -      |
| 2     | MTBE               | ND        | -      |
| 3     | Et <sub>2</sub> O  | ND        | -      |
| 4     | EtOAc              | ND        | -      |
| 5     | CH <sub>3</sub> OH | 21        | 90     |
| 6     | DCE                | ND        | -      |
| 7     | toluene            | ND        | -      |

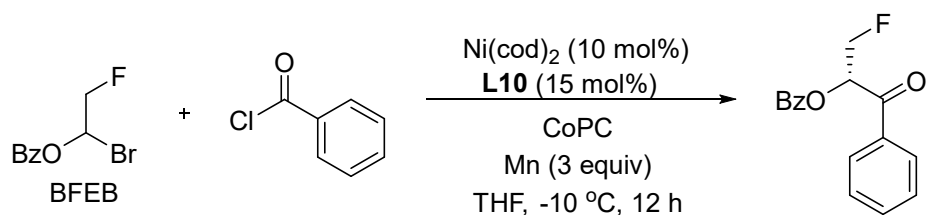

| Entry | CoPC (mol%) | Yield (%) | ee (%) |
|-------|-------------|-----------|--------|
| 1     | 2.5         | 76        | 91     |
| 2     | 5.0         | 81        | 93     |
| 3     | 7.5         | 82        | 92     |

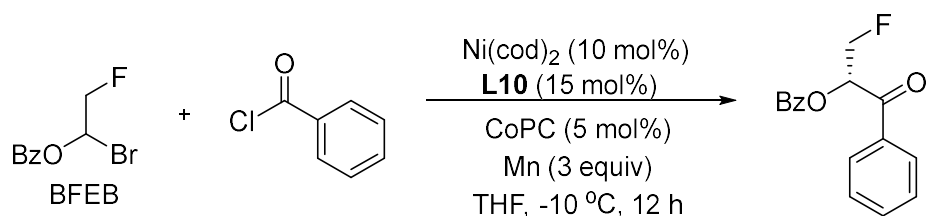

| Entry | THF (mL) | Yield (%) | ee (%) |
|-------|----------|-----------|--------|
| 1     | 0.5      | 82        | 93     |
| 2     | 1.0      | 81        | 93     |
| 3     | 1.5      | 78        | 92     |

## 4 General Procedure for Synthesis of Products 2

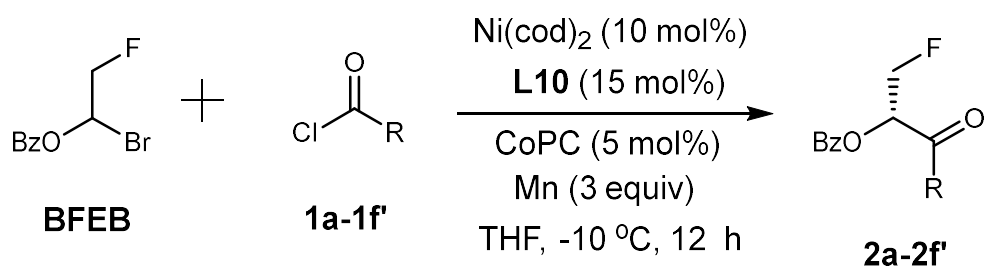

In a glove box,  $\text{Ni}(\text{cod})_2$  (2.8 mg, 0.01 mmol, 10 mol%), and **L10** (12.6 mg, 0.015 mmol, 15 mol%) were added into a 4 mL glass bottle in THF (1 mL). The mixture was stirred at room temperature for 30 mins, then brominated fluoroethanol benzoate (**BFEB**) (29.6 mg, 0.12 mmol, 1.2 equiv.), acid chlorides **1** (0.1 mmol, 1.0 equiv.), Mn (16.5 mg, 0.3 mmol, 3 equiv.), cobalt(II) phthalocyanine (CoPc) (2.9 mg, 0.005 mmol, 5 mol%) were added and keep stirring at  $-10\text{ }^\circ\text{C}$  for 12 hours. After evaporation under reduced pressure to remove the solvent, the mixture was passed through a short column of silica gel to remove the metal complex. The residue was purified by flash chromatography on silica gel (PE : EA = 50: 1) to afford the desired chiral product **2**. The racemic products were obtained by employing **L1** as the ligand under otherwise identical conditions.

## 5 Characterization Data for New Compounds

### (*S*)-3-fluoro-1-oxo-1-phenylpropan-2-yl benzoate (2a)

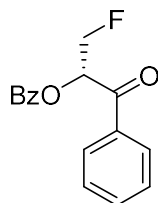

22.3 mg, 82% yield, 93% ee, PE : EA = 50: 1. White solid; m.p.: 104-105 °C;  $[\alpha]_{\text{D}}^{25} = -60.8$  (*c* 1.0, CH<sub>2</sub>Cl<sub>2</sub>); **<sup>1</sup>H NMR** (500 MHz, Chloroform-*d*)  $\delta$  7.92 (d, *J* = 7.7 Hz, 2H), 7.82 (d, *J* = 7.7 Hz, 2H), 7.41 (q, *J* = 7.2 Hz, 2H), 7.29 (dt, *J* = 15.4, 7.7 Hz, 4H), 6.19 (dt, *J* = 22.2, 4.5 Hz, 1H), 4.75 (dd, *J* = 47.0, 4.5 Hz, 2H). **<sup>19</sup>F NMR** (470 MHz, Chloroform-*d*)  $\delta$  -228.36 (td, *J* = 46.9, 22.2 Hz). **<sup>13</sup>C NMR** (126 MHz, Chloroform-*d*)  $\delta$  193.3 (d, *J* = 6.6 Hz), 165.7, 134.7, 134.0, 133.7, 130.1, 128.9, 128.6, 128.5, 81.6 (d, *J* = 177.6 Hz), 74.9 (d, *J* = 20.2 Hz); **HRMS** (ESI) *m/z* calcd. for C<sub>16</sub>H<sub>13</sub>O<sub>3</sub>FNa ([M+Na]<sup>+</sup>): 295.0746, found 295.0755; The enantiomeric excess was determined by Chiral HPLC (Chiralpak IA, 0.8 mL/min, *n*-Hexane : *i*-PrOH =90:10, Rt (major) 12.03 min, Rt (minor) 15.28 min.

### (*S*)-3-fluoro-1-oxo-1-(*p*-tolyl)propan-2-yl benzoate (2b)

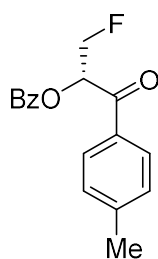

22.3 mg, 78% yield, 88% ee, PE : EA = 50: 1. White solid; m.p.: 96-97 °C;  $[\alpha]_{\text{D}}^{25} = -38.6$  (*c* 1.0, CH<sub>2</sub>Cl<sub>2</sub>); **<sup>1</sup>H NMR** (500 MHz, Chloroform-*d*)  $\delta$  7.97 – 7.87 (m, 2H), 7.76 – 7.70 (m, 2H), 7.43 – 7.36 (m, 1H), 7.27 (t, *J* = 7.9 Hz, 2H), 7.10 (d, *J* = 8.0 Hz, 2H), 6.19 (dt, *J* = 21.8, 4.5 Hz, 1H), 4.74 (dd, *J* = 47.0, 4.5 Hz, 2H), 2.22 (s, 3H). **<sup>19</sup>F NMR** (470 MHz, Chloroform-*d*)  $\delta$  -228.28 (td, *J* = 47.0, 21.9 Hz). **<sup>13</sup>C NMR** (126 MHz,



Chloroform-*d*)  $\delta$  193.3 (d,  $J = 6.8$  Hz), 166.3, 145.8, 134.20, 132.7, 130.6, 130.2, 129.6, 129.3, 129.1, 82.3 (d,  $J = 177.6$  Hz), 75.4 (d,  $J = 20.2$  Hz), 22.3; **HRMS** (ESI)  $m/z$  calcd. for  $C_{17}H_{15}O_3FNa$  ( $[M+Na]^+$ ): 309.0903, found 309.0909; The enantiomeric excess was determined by Chiral HPLC (Chiralpak IB, 0.8 mL/min, *n*-Hexane : *i*PrOH =90:10, Rt (major) 8.71 min, Rt (minor) 11.09 min.

**(S)-3-fluoro-1-oxo-1-(*m*-tolyl)propan-2-yl benzoate (2c)**

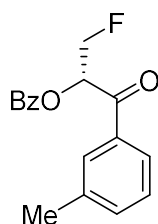

23.5 mg, 82% yield, 88% ee, PE : EA = 50: 1. White solid; m.p.: 102-103 °C;  $[\alpha]_D^{25} = -38.4$  (*c* 1.0,  $CH_2Cl_2$ );  **$^1H$  NMR** (500 MHz, Chloroform-*d*)  $\delta$  7.94 – 7.82 (m, 2H), 7.57 (d,  $J = 8.4$  Hz, 2H), 7.35 (td,  $J = 7.5, 1.4$  Hz, 1H), 7.22 (t,  $J = 7.9$  Hz, 2H), 7.18 (d,  $J = 7.8$  Hz, 1H), 7.14 (t,  $J = 7.5$  Hz, 1H), 6.14 (dt,  $J = 22.4, 4.5$  Hz, 1H), 4.69 (dd,  $J = 47.0, 4.5$  Hz, 2H), 2.17 (s, 3H).  **$^{19}F$  NMR** (470 MHz, Chloroform-*d*)  $\delta$  -228.19 (td,  $J = 46.9, 22.4$  Hz).  **$^{13}C$  NMR** (126 MHz, Chloroform-*d*)  $\delta$  194.1 (d,  $J = 6.6$  Hz), 166.4, 139.6, 135.6, 135.4, 134.4, 130.8, 129.8, 129.7, 129.5, 129.2, 126.5, 82.4 (d,  $J = 177.6$  Hz), 75.7 (d,  $J = 20.2$  Hz), 22.1; **HRMS** (ESI)  $m/z$  calcd. for  $C_{17}H_{15}O_3FNa$  ( $[M+Na]^+$ ): 309.0903, found 309.0910; The enantiomeric excess was determined by Chiral HPLC (Chiralpak IB, 0.8 mL/min, *n*-Hexane : *i*PrOH =90:10, Rt (major) 8.03 min, Rt (minor) 9.56 min.

**(S)-1-(4-(*tert*-butyl)phenyl)-3-fluoro-1-oxopropan-2-yl benzoate (2d)**

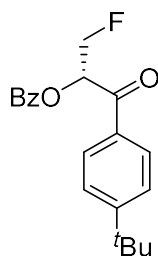

25.3 mg, 77% yield, 91% ee, PE : EA = 50: 1. White solid; m.p.: 100-101 °C;  $[\alpha]_D^{25} = -29.4$  (*c* 1.0, CH<sub>2</sub>Cl<sub>2</sub>); **<sup>1</sup>H NMR** (500 MHz, Chloroform-*d*)  $\delta$  7.96 – 7.91 (m, 2H), 7.81 – 7.76 (m, 2H), 7.40 (dt, *J* = 7.7, 3.7 Hz, 1H), 7.35 – 7.30 (m, 2H), 7.30 – 7.23 (m, 2H), 6.22 (dt, *J* = 21.6, 4.6 Hz, 1H), 4.98 – 4.56 (m, 2H), 1.15 (s, 9H). **<sup>19</sup>F NMR** (470 MHz, Chloroform-*d*)  $\delta$  -228.19 (td, *J* = 46.8, 21.6 Hz). **<sup>13</sup>C NMR** (126 MHz, Chloroform-*d*)  $\delta$  193.2 (d, *J* = 6.8 Hz), 166.4, 158.8, 134.3, 132.7, 130.8, 129.7, 129.3, 129.2, 126.7, 82.4 (d, *J* = 177.8 Hz), 75.4 (d, *J* = 20.2 Hz), 36.0, 31.7; **HRMS** (ESI) *m/z* calcd. for C<sub>20</sub>H<sub>21</sub>O<sub>3</sub>FNa ([M+Na]<sup>+</sup>): 351.1372, found 351.1378; The enantiomeric excess was determined by Chiral HPLC (Chiralpak IB, 0.8 mL/min, *n*-Hexane : <sup>t</sup>PrOH =90:10, R<sub>t</sub> (major) 7.17 min, R<sub>t</sub> (minor) 9.45 min.

**(S)-3-fluoro-1-(4-methoxyphenyl)-1-oxopropan-2-yl benzoate (2e)**

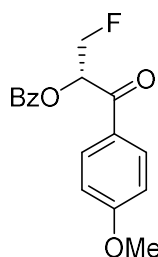

20.3 mg, 67% yield, 92% ee, PE : EA = 50: 1. White solid; m.p.: 95-96 °C;  $[\alpha]_D^{25} = -48.2$  (*c* 1.0, CH<sub>2</sub>Cl<sub>2</sub>); **<sup>1</sup>H NMR** (500 MHz, Chloroform-*d*)  $\delta$  8.14 – 8.09 (m, 2H), 8.04 – 7.99 (m, 2H), 7.62 – 7.55 (m, 1H), 7.46 (ddt, *J* = 8.5, 6.5, 1.2 Hz, 2H), 6.99 – 6.93 (m, 2H), 6.37 (dt, *J* = 21.2, 4.7 Hz, 1H), 4.92 (dd, *J* = 47.0, 4.7 Hz, 2H), 3.86 (s, 3H). **<sup>19</sup>F NMR** (470 MHz, Chloroform-*d*)  $\delta$  -228.14 (td, *J* = 46.9, 21.3 Hz). **<sup>13</sup>C NMR** (126 MHz, Chloroform-*d*)  $\delta$  191.4 (d, *J* = 7.3 Hz), 165.7, 164.3, 133.6, 131.1, 130.1, 129.0, 128.5, 127.5, 114.2, 81.8 (d, *J* = 177.7 Hz), 74.5 (d, *J* = 19.9 Hz), 55.6; **HRMS** (ESI)

$m/z$  calcd. for  $C_{17}H_{15}O_4FNa$  ( $[M+Na]^+$ ): 325.0852, found 325.0860; The enantiomeric excess was determined by Chiral HPLC (Chiralpak IB, 0.8 mL/min, *n*-Hexane : *i*-PrOH =90:10,  $R_t$  (major) 13.12 min,  $R_t$  (minor) 16.75 min.

**(*S*)-1-(3,5-dimethoxyphenyl)-3-fluoro-1-oxopropan-2-yl benzoate (2f)**

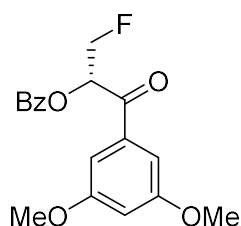

27.9 mg, 84% yield, 96% ee, PE : EA = 50: 1. White solid; m.p.: 50-51 °C;  $[\alpha]_D^{25} = -14.4$  ( $c$  1.0,  $CH_2Cl_2$ );  $^1H$  NMR (500 MHz, Chloroform-*d*)  $\delta$  8.15 – 8.07 (m, 2H), 7.59 (ddt,  $J = 8.8, 7.2, 1.3$  Hz, 1H), 7.52 – 7.40 (m, 2H), 7.13 (d,  $J = 2.3$  Hz, 2H), 6.68 (t,  $J = 2.3$  Hz, 1H), 6.32 (dt,  $J = 22.3, 4.4$  Hz, 1H), 4.93 (dd,  $J = 47.0, 4.4$  Hz, 2H), 3.81 (s, 6H).  $^{19}F$  NMR (470 MHz, Chloroform-*d*)  $\delta$  -228.41 (td,  $J = 47.1, 22.2$  Hz).  $^{13}C$  NMR (126 MHz, Chloroform-*d*)  $\delta$  192.9 (d,  $J = 6.8$  Hz), 165.7, 161.1, 136.4, 133.7, 130.1, 128.9, 128.5, 106.5, 106.2, 81.7 (d,  $J = 177.8$  Hz), 74.9 (d,  $J = 20.2$  Hz), 55.6; HRMS (ESI)  $m/z$  calcd. for  $C_{18}H_{17}O_5FNa$  ( $[M+Na]^+$ ): 355.0958, found 355.0965; The enantiomeric excess was determined by Chiral HPLC (Chiralpak IB, 0.8 mL/min, *n*-Hexane : *i*-PrOH =90:10,  $R_t$  (major) 13.15 min,  $R_t$  (minor) 11.97 min.

**(*S*)-3-fluoro-1-oxo-1-(4-(trifluoromethoxy)phenyl)propan-2-yl benzoate (2g)**

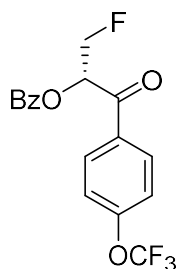

28.5 mg, 80% yield, 95% ee, PE : EA = 50: 1. White solid; m.p.: 63-64 °C;  $[\alpha]_D^{25} = -44.0$  ( $c$  1.0,  $CH_2Cl_2$ );  $^1H$  NMR (500 MHz, Chloroform-*d*)  $\delta$  7.95 – 7.85 (m, 4H), 7.46

- 7.38 (m, 1H), 7.28 (t,  $J = 7.8$  Hz, 2H), 7.16 – 7.09 (m, 2H), 6.10 (ddd,  $J = 22.4, 4.9, 3.9$  Hz, 1H), 4.91 – 4.57 (m, 2H).  $^{19}\text{F}$  NMR (470 MHz, Chloroform- $d$ )  $\delta$  -57.60, -228.57 (tdd,  $J = 47.2, 22.6, 4.3$  Hz).  $^{13}\text{C}$  NMR (126 MHz, Chloroform- $d$ )  $\delta$  193.0 (d,  $J = 6.0$  Hz), 166.4, 154.0, 134.6, 133.6, 131.5, 130.8, 129.4, 129.3, 121.3, 121.0 (q,  $J = 259.3$  Hz), 82.3 (d,  $J = 177.3$  Hz), 75.6 (d,  $J = 20.7$  Hz); HRMS (ESI)  $m/z$  calcd. for  $\text{C}_{17}\text{H}_{12}\text{O}_4\text{F}_4\text{Na}$  ( $[\text{M}+\text{Na}]^+$ ): 379.0569, found 379.0572; The enantiomeric excess was determined by Chiral HPLC (Chiralpak IB, 0.8 mL/min,  $n$ -Hexane :  $i$ PrOH =90:10, Rt (major) 7.64 min, Rt (minor) 9.88 min.

### **(*S*)-3-fluoro-1-oxo-1-(4-((trifluoromethyl)thio)phenyl)propan-2-yl**

#### **benzoate (2h)**

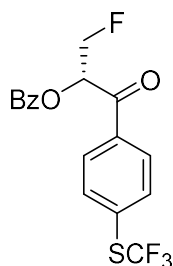

19.7 mg, 53% yield, 92% ee, PE : EA = 50: 1. White solid; m.p.: 66-67 °C;  $[\alpha]_{\text{D}}^{25} = -33.4$  ( $c$  1.0,  $\text{CH}_2\text{Cl}_2$ );  $^1\text{H}$  NMR (500 MHz, Chloroform- $d$ )  $\delta$  7.97 – 7.93 (m, 2H), 7.90 (d,  $J = 8.4$  Hz, 2H), 7.63 (d,  $J = 8.1$  Hz, 2H), 7.50 – 7.45 (m, 1H), 7.33 (t,  $J = 7.8$  Hz, 2H), 6.14 (ddd,  $J = 22.7, 5.1, 3.7$  Hz, 1H), 4.82 (ddd,  $J = 46.9, 4.4, 2.9$  Hz, 2H).  $^{19}\text{F}$  NMR (470 MHz, Chloroform- $d$ )  $\delta$  -41.48, -228.61 (td,  $J = 46.9, 22.7$  Hz).  $^{13}\text{C}$  NMR (126 MHz, Chloroform- $d$ )  $\delta$  193.9 (d,  $J = 6.0$  Hz), 166.4, 137.0, 136.4, 134.6, 131.9 (d,  $J = 2.3$  Hz), 129.9 (q,  $J = 309.96$  Hz), 130.8, 130.0, 129.3, 129.3, 82.2 (d,  $J = 177.5$  Hz), 75.7 (d,  $J = 20.7$  Hz); HRMS (ESI)  $m/z$  calcd. for  $\text{C}_{17}\text{H}_{12}\text{O}_3\text{F}_4\text{NaS}$  ( $[\text{M}+\text{Na}]^+$ ): 395.0341, found 395.0339; The enantiomeric excess was determined by Chiral HPLC (Chiralpak IB, 0.8 mL/min,  $n$ -Hexane :  $i$ PrOH =90:10, Rt (major) 8.57 min, Rt (minor) 12.02 min.

**(S)-3-fluoro-1-(4-fluorophenyl)-1-oxopropan-2-yl benzoate(2i)**

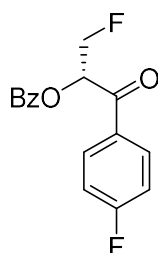

12.8 mg, 44% yield, 90% ee, PE : EA = 50: 1. White solid; m.p.: 81-82 °C;  $[\alpha]_D^{25} = -76.4$  (*c* 1.0, CH<sub>2</sub>Cl<sub>2</sub>); <sup>1</sup>H NMR (500 MHz, Chloroform-*d*) δ 7.89 – 7.79 (m, 4H), 7.36 (t, *J* = 7.5 Hz, 1H), 7.22 (t, *J* = 7.7 Hz, 2H), 6.92 (t, *J* = 8.4 Hz, 2H), 6.07 (dt, *J* = 22.3, 4.5 Hz, 1H), 4.70 (dd, *J* = 47.0, 4.6 Hz, 2H). <sup>19</sup>F NMR (470 MHz, Chloroform-*d*) δ -103.02 (tt, *J* = 8.8, 5.1 Hz), -228.44 (td, *J* = 46.9, 22.4 Hz). <sup>13</sup>C NMR (126 MHz, Chloroform-*d*) δ 192.8 (d, *J* = 6.3 Hz), 166.9 (d, *J* = 256.7 Hz), 166.4, 134.5, 132.1 (d, *J* = 9.6 Hz), 131.8 (d, *J* = 3.1 Hz), 130.8, 129.5, 129.3, 116.9 (d, *J* = 22.1 Hz), 82.3 (d, *J* = 177.3 Hz), 75.5 (d, *J* = 20.4 Hz). HRMS (ESI) *m/z* calcd. for C<sub>16</sub>H<sub>12</sub>O<sub>3</sub>F<sub>2</sub>Na ([M+Na]<sup>+</sup>): 313.0652, found 313.0661; The enantiomeric excess was determined by Chiral HPLC (Chiralpak IB, 0.8 mL/min, *n*-Hexane : <sup>i</sup>PrOH =90:10, Rt (major) 9.28 min, Rt (minor) 10.88 min.

**(S)-3-fluoro-1-(3-fluorophenyl)-1-oxopropan-2-yl benzoate (2j)**

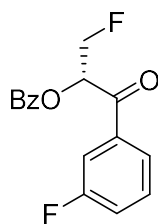

18.6 mg, 64% yield, 94% ee, PE : EA = 50: 1. White solid; m.p.: 56-57 °C;  $[\alpha]_D^{25} = -57.8$  (*c* 1.0, CH<sub>2</sub>Cl<sub>2</sub>); <sup>1</sup>H NMR (500 MHz, Chloroform-*d*) δ 7.87 (d, *J* = 7.9 Hz, 2H), 7.57 (d, *J* = 7.7 Hz, 1H), 7.47 (dt, *J* = 9.1, 2.2 Hz, 1H), 7.37 (t, *J* = 7.5 Hz, 1H), 7.23 (td, *J* = 8.1, 2.6 Hz, 3H), 7.07 (td, *J* = 8.2, 2.8 Hz, 1H), 6.05 (dt, *J* = 22.6, 4.4 Hz, 1H), 4.83 – 4.60 (m, 2H). <sup>19</sup>F NMR (470 MHz, Chloroform-*d*) δ -110.87 (td, *J* = 8.8, 5.4 Hz), -228.49 (td, *J* = 46.8, 22.5 Hz). <sup>13</sup>C NMR (126 MHz, Chloroform-*d*) δ 193.2 (dd, *J* =

6.4, 2.3 Hz), 166.4, 163.6 (d,  $J = 249.0$  Hz), 137.4 (d,  $J = 6.5$  Hz), 134.5, 131.4 (d,  $J = 7.4$  Hz), 130.8, 129.4, 129.3, 125.0 (d,  $J = 3.2$  Hz), 121.8 (d,  $J = 21.6$  Hz), 116.2 (d,  $J = 22.8$  Hz), 82.2 (d,  $J = 177.4$  Hz), 75.7 (d,  $J = 20.7$  Hz); **HRMS** (ESI)  $m/z$  calcd. for  $C_{16}H_{12}O_3F_2Na$  ( $[M+Na]^+$ ): 313.0652, found 313.0660; The enantiomeric excess was determined by Chiral HPLC (Chiralpak IB, 0.8 mL/min, *n*-Hexane : *i*PrOH =90:10, Rt (major) 8.61 min, Rt (minor) 10.01 min.

### (*S*)-3-fluoro-1-(2-fluorophenyl)-1-oxopropan-2-yl benzoate (2k)

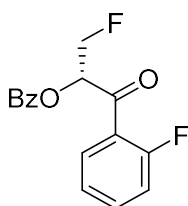

22.4 mg, 77% yield, 85% ee, PE : EA = 50: 1. White solid; m.p.: 48-49 °C;  $[\alpha]_D^{25} = -89.0$  ( $c$  1.0,  $CH_2Cl_2$ );  **$^1H$  NMR** (500 MHz, Chloroform-*d*)  $\delta$  8.11 (d,  $J = 7.8$  Hz, 2H), 7.92 (td,  $J = 7.5, 1.8$  Hz, 1H), 7.59 (td,  $J = 7.3, 5.4$  Hz, 2H), 7.46 (t,  $J = 7.7$  Hz, 2H), 7.29 (t,  $J = 7.6$  Hz, 1H), 7.18 (dd,  $J = 11.3, 8.3$  Hz, 1H), 6.26 (dt,  $J = 25.7, 3.8$  Hz, 1H), 5.08 – 4.83 (m, 2H).  **$^{19}F$  NMR** (470 MHz, Chloroform-*d*)  $\delta$  -109.20 (dt,  $J = 11.1, 6.0$  Hz), -229.63 (td,  $J = 47.0, 25.4$  Hz).  **$^{13}C$  NMR** (126 MHz, Chloroform-*d*)  $\delta$  190.8 (dd,  $J = 6.9, 3.8$  Hz), 165.8, 161.5 (d,  $J = 253.6$  Hz), 135.7 (d,  $J = 9.2$  Hz), 133.7, 131.3 (d,  $J = 2.7$  Hz), 130.1, 129.1, 128.6, 125.2 (d,  $J = 3.2$  Hz), 123.4 (d,  $J = 13.7$  Hz), 116.7 (d,  $J = 23.5$  Hz), 81.1 (dd,  $J = 177.5, 2.7$  Hz), 78.2 (dd,  $J = 19.6, 7.8$  Hz); **HRMS** (ESI)  $m/z$  calcd. for  $C_{16}H_{12}O_3F_2Na$  ( $[M+Na]^+$ ): 313.0652, found 313.0661; The enantiomeric excess was determined by Chiral HPLC (Chiralpak IB, 0.8 mL/min, *n*-Hexane : *i*PrOH =90:10, Rt (major) 8.15 min, Rt (minor) 8.57 min.

**(S)-3-fluoro-1-oxo-1-(3,4,5-trifluorophenyl)propan-2-yl benzoate (2l)**

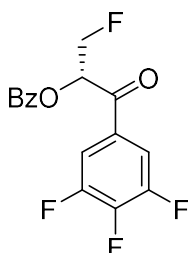

15.7 mg, 48% yield, 94% ee, PE : EA = 50: 1. White solid; m.p.: 48-49 °C;  $[\alpha]_D^{25} = -45.4$  (*c* 1.0, CH<sub>2</sub>Cl<sub>2</sub>); **<sup>1</sup>H NMR** (500 MHz, Chloroform-*d*)  $\delta$  7.89 (dd, *J* = 8.2, 1.4 Hz, 2H), 7.50 (t, *J* = 6.9 Hz, 2H), 7.43 (t, *J* = 7.6 Hz, 1H), 7.29 (t, *J* = 7.8 Hz, 2H), 5.90 (dt, *J* = 23.0, 4.3 Hz, 1H), 4.75 (dt, *J* = 47.0, 4.1 Hz, 2H). **<sup>19</sup>F NMR** (470 MHz, Chloroform-*d*)  $\delta$  -131.33 – -131.48 (m), -150.46 (tt, *J* = 20.1, 6.3 Hz), -228.49 (td, *J* = 46.8, 23.2 Hz). **<sup>13</sup>C NMR** (126 MHz, Chloroform-*d*)  $\delta$  191.8, 166.2, 151.9 (ddd, *J* = 253.5, 10.2, 3.3 Hz), 144.3 (dt, *J* = 249.48, 15.12 Hz), 134.7, 130.9 (d, *J* = 4.2 Hz), 130.6, 129.3, 128.9, 114.1 (dd, *J* = 17.2, 5.7 Hz), 82.0 (d, *J* = 177.2 Hz), 75.4 (d, *J* = 21.1 Hz); **HRMS** (ESI) *m/z* calcd. for C<sub>16</sub>H<sub>10</sub>O<sub>3</sub>F<sub>4</sub>Na ([M+Na]<sup>+</sup>): 349.0464, found 349.0466; The enantiomeric excess was determined by Chiral HPLC (Chiralpak IB, 0.8 mL/min, *n*-Hexane : *i*-PrOH = 90:10, Rt (major) 9.02 min, Rt (minor) 10.21 min.

**(S)-1-(4-chlorophenyl)-3-fluoro-1-oxopropan-2-yl benzoate (2m)**

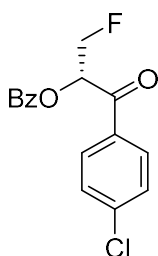

25.5 mg, 83% yield, 94% ee, PE : EA = 50: 1. White solid; m.p.: 53-54 °C;  $[\alpha]_D^{25} = -37.0$  (*c* 1.0, CH<sub>2</sub>Cl<sub>2</sub>); **<sup>1</sup>H NMR** (500 MHz, Chloroform-*d*)  $\delta$  7.90 (dd, *J* = 8.4, 1.4 Hz, 2H), 7.76 (d, *J* = 8.6 Hz, 2H), 7.41 (td, *J* = 7.4, 1.5 Hz, 1H), 7.32 – 7.22 (m, 4H), 6.08 (dt, *J* = 22.4, 4.4 Hz, 1H), 4.89 – 4.63 (m, 2H). **<sup>19</sup>F NMR** (470 MHz, Chloroform-*d*)  $\delta$  -228.53 (td, *J* = 46.9, 22.5 Hz). **<sup>13</sup>C NMR** (126 MHz, Chloroform-*d*)  $\delta$  193.3 (d, *J* = 6.0 Hz), 166.4, 141.3, 134.5, 133.7, 130.8, 130.0, 129.4, 129.3, 82.3 (d, *J* = 177.3 Hz), 75.5

(d,  $J = 20.6$  Hz); **HRMS** (ESI)  $m/z$  calcd. for  $C_{16}H_{12}O_3FNaCl$  ( $[M+Na]^+$ ): 329.0357, found 329.0364; The enantiomeric excess was determined by Chiral HPLC (Chiralpak IB, 0.8 mL/min, *n*-Hexane : *i*PrOH =90:10,  $R_t$  (major) 9.36 min,  $R_t$  (minor) 11.67 min.

**(S)-1-(3-chloro-4-fluorophenyl)-3-fluoro-1-oxopropan-2-yl benzoate**  
**(2n)**

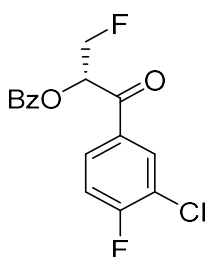

24.0 mg, 74% yield, 95% ee, PE : EA = 50: 1. White solid; m.p.: 69-70 °C;  $[\alpha]_D^{25} = -71.4$  ( $c$  1.0,  $CH_2Cl_2$ );  **$^1H$  NMR** (500 MHz, Chloroform-*d*)  $\delta$  7.97 – 7.86 (m, 3H), 7.74 (ddd,  $J = 8.6, 4.5, 2.3$  Hz, 1H), 7.42 (t,  $J = 7.4$  Hz, 1H), 7.28 (t,  $J = 7.7$  Hz, 2H), 7.06 (t,  $J = 8.6$  Hz, 1H), 6.00 (ddd,  $J = 22.7, 5.0, 3.7$  Hz, 1H), 4.75 (dt,  $J = 46.9, 4.1$  Hz, 2H).  **$^{19}F$  NMR** (470 MHz, Chloroform-*d*)  $\delta$  -105.54 (td,  $J = 7.7, 4.4$  Hz), -228.46 (td,  $J = 46.9, 22.7$  Hz).  **$^{13}C$  NMR** (126 MHz, Chloroform-*d*)  $\delta$  191.7 (d,  $J = 5.9$  Hz), 165.6, 161.5 (d,  $J = 258.8$  Hz), 133.9, 131.9 (d,  $J = 3.8$  Hz), 131.8, 130.0, 129.1 (d,  $J = 8.6$  Hz), 128.6, 128.5, 122.4 (d,  $J = 18.3$  Hz), 117.2 (d,  $J = 21.8$  Hz), 81.5 (d,  $J = 177.2$  Hz), 74.8 (d,  $J = 20.7$  Hz); **HRMS** (ESI)  $m/z$  calcd. for  $C_{16}H_{11}O_3F_2NaCl$  ( $[M+Na]^+$ ): 347.0262, found 347.0268; The enantiomeric excess was determined by Chiral HPLC (Chiralpak IB, 0.8 mL/min, *n*-Hexane : *i*PrOH =90:10,  $R_t$  (major) 10.02 min,  $R_t$  (minor) 11.47 min.



**(S)-1-(4-bromophenyl)-3-fluoro-1-oxopropan-2-yl benzoate (2o)**

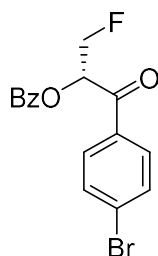

28.8 mg, 82% yield, 94% ee, PE : EA = 50: 1. White solid; m.p.: 61-62 °C;  $[\alpha]_D^{25} = -85.8$  (*c* 1.0, CH<sub>2</sub>Cl<sub>2</sub>); <sup>1</sup>H NMR (500 MHz, Chloroform-*d*) δ 8.12 – 8.06 (m, 2H), 7.90 – 7.85 (m, 2H), 7.66 – 7.57 (m, 3H), 7.46 (t, *J* = 7.7 Hz, 2H), 6.26 (dt, *J* = 22.3, 4.3 Hz, 1H), 5.02 – 4.83 (m, 2H). <sup>19</sup>F NMR (470 MHz, Chloroform-*d*) δ -228.58 (td, *J* = 46.9, 22.4 Hz). <sup>13</sup>C NMR (126 MHz, Chloroform-*d*) δ 192.8 (d, *J* = 6.2 Hz), 165.6, 133.8, 133.5, 132.3, 130.1, 130.1, 129.4, 128.7, 128.6, 81.5 (d, *J* = 177.4 Hz), 74.8 (d, *J* = 20.5 Hz); HRMS (ESI) *m/z* calcd. for C<sub>16</sub>H<sub>12</sub>O<sub>3</sub>FNaBr ([M+Na]<sup>+</sup>): 372.9852, found 372.9861; The enantiomeric excess was determined by Chiral HPLC (Chiralpak IB, 0.8 mL/min, *n*-Hexane : <sup>i</sup>PrOH = 90:10, Rt (major) 9.78 min, Rt (minor) 12.57 min.

**(S)-1-(3-bromophenyl)-3-fluoro-1-oxopropan-2-yl benzoate (2p)**

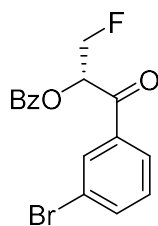

17.2 mg, 49% yield, 87% ee, PE : EA = 50: 1. White solid; m.p.: 80-81 °C;  $[\alpha]_D^{25} = -30.4$  (*c* 1.0, CH<sub>2</sub>Cl<sub>2</sub>); <sup>1</sup>H NMR (500 MHz, Chloroform-*d*) δ 7.95 (t, *J* = 1.8 Hz, 1H), 7.93 – 7.88 (m, 2H), 7.74 (dt, *J* = 7.8, 1.4 Hz, 1H), 7.53 (dd, *J* = 8.1, 2.0 Hz, 1H), 7.42 (tq, *J* = 7.2, 1.7 Hz, 1H), 7.31 – 7.24 (m, 2H), 7.18 (t, *J* = 7.9 Hz, 1H), 6.06 (ddd, *J* = 22.9, 5.1, 3.6 Hz, 1H), 4.75 (ddd, *J* = 47.0, 4.4, 2.8 Hz, 2H). <sup>19</sup>F NMR (470 MHz, Chloroform-*d*) δ -228.43 (td, *J* = 46.8, 23.1 Hz). <sup>13</sup>C NMR (126 MHz, Chloroform-*d*) δ 193.3 (d, *J* = 6.0 Hz), 166.3, 137.5, 137.2, 134.5, 132.3, 131.2, 130.8, 129.7, 129.3, 127.8, 123.9, 82.2 (d, *J* = 177.5 Hz), 75.7 (dd, *J* = 20.5, 11.6 Hz); HRMS (ESI) *m/z*

calcd. for  $C_{16}H_{12}O_3FNaBr$  ( $[M+Na]^+$ ): 372.9852, found 372.9848; The enantiomeric excess was determined by Chiral HPLC (Chiralpak IB, 0.8 mL/min, *n*-Hexane : *i*-PrOH =90:10, Rt (major) 9.31 min, Rt (minor) 10.80 min.

### (*S*)-3-fluoro-1-(4-iodophenyl)-1-oxopropan-2-yl benzoate (2q)

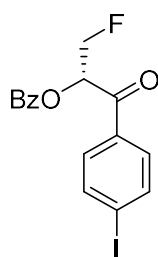

31.5 mg, 79% yield, 94% ee, PE : EA = 50: 1. White solid; m.p.: 72-73 °C;  $[\alpha]_D^{25} = -52.8$  (*c* 1.0,  $CH_2Cl_2$ );  $^1H$  NMR (500 MHz, Chloroform-*d*)  $\delta$  8.11 – 8.06 (m, 2H), 7.86 (d, *J* = 8.5 Hz, 2H), 7.71 (d, *J* = 8.6 Hz, 2H), 7.64 – 7.57 (m, 1H), 7.47 (t, *J* = 7.8 Hz, 2H), 6.25 (ddd, *J* = 22.2, 4.9, 3.9 Hz, 1H), 5.05 – 4.75 (m, 2H).  $^{19}F$  NMR (470 MHz, Chloroform-*d*)  $\delta$  -228.62 (td, *J* = 47.1, 22.2 Hz).  $^{13}C$  NMR (126 MHz, Chloroform-*d*)  $\delta$  193.1 (d, *J* = 6.2 Hz), 165.6, 138.3, 134.0, 133.8, 130.1, 129.9, 128.7, 128.6, 102.3, 81.5 (d, *J* = 177.4 Hz), 74.7 (d, *J* = 20.6 Hz); HRMS (ESI) *m/z* calcd. for  $C_{16}H_{12}O_3FNaI$  ( $[M+Na]^+$ ): 420.9713, found 420.9717; The enantiomeric excess was determined by Chiral HPLC (Chiralpak IB, 0.8 mL/min, *n*-Hexane : *i*-PrOH =90:10, Rt (major) 11.13 min, Rt (minor) 14.75 min.

### (*S*)-3-fluoro-1-oxo-1-(4-(trifluoromethyl)phenyl)propan-2-yl benzoate (2r)

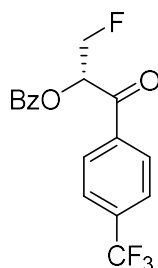

17.4 mg, 51% yield, 76% ee, PE : EA = 50: 1. White solid; m.p.: 63-64 °C;  $[\alpha]_D^{25} = -$

35.2 (*c* 1.0, CH<sub>2</sub>Cl<sub>2</sub>); **<sup>1</sup>H NMR** (500 MHz, Chloroform-*d*) δ 7.87 (dd, *J* = 14.4, 7.9 Hz, 4H), 7.52 (d, *J* = 8.1 Hz, 2H), 7.38 (t, *J* = 7.4 Hz, 1H), 7.24 (t, *J* = 7.7 Hz, 2H), 6.05 (dt, *J* = 22.9, 4.3 Hz, 1H), 4.73 (dt, *J* = 46.9, 3.6 Hz, 2H). **<sup>19</sup>F NMR** (470 MHz, Chloroform-*d*) δ -63.31, -228.77 (td, *J* = 46.9, 22.8 Hz). **<sup>13</sup>C NMR** (126 MHz, Chloroform-*d*) δ 196.0 (d, *J* = 5.8 Hz), 168.4, 140.3, 137.8 (q, *J* = 33.0 Hz), 136.6, 132.8, 131.7, 131.3, 131.2, 128.7 (q, *J* = 3.8 Hz), 126.1 (q, *J* = 273.0 Hz), 84.2 (d, *J* = 177.4 Hz), 77.8 (d, *J* = 20.8 Hz); **HRMS** (ESI) *m/z* calcd. for C<sub>17</sub>H<sub>12</sub>O<sub>3</sub>F<sub>4</sub>Na ([M+Na]<sup>+</sup>): 363.0620, found 363.0624; The enantiomeric excess was determined by Chiral HPLC (Chiralpak IB, 0.8 mL/min, *n*-Hexane : <sup>i</sup>PrOH =90:10, Rt (major) 8.32 min, Rt (minor) 10.99 min.

### **methyl (*S*)-4-(2-(benzoyloxy)-3-fluoropropanoyl)benzoate (2s)**

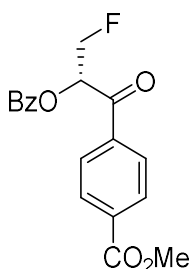

13.2 mg, 40% yield, 92% ee, PE : EA = 50: 1. White solid; m.p.: 95-96 °C; [ $\alpha$ ]<sub>D</sub><sup>25</sup> = -10.6 (*c* 1.0, CH<sub>2</sub>Cl<sub>2</sub>); **<sup>1</sup>H NMR** (500 MHz, Chloroform-*d*) δ 8.14 (d, *J* = 8.4 Hz, 2H), 8.07 (dd, *J* = 16.7, 8.0 Hz, 4H), 7.60 (tq, *J* = 7.2, 1.5 Hz, 1H), 7.46 (t, *J* = 7.8 Hz, 2H), 6.30 (ddd, *J* = 23.1, 4.9, 3.7 Hz, 1H), 4.95 (ddd, *J* = 46.9, 4.3, 1.9 Hz, 2H), 3.94 (s, 3H). **<sup>19</sup>F NMR** (470 MHz, Chloroform-*d*) δ -228.66 (td, *J* = 46.9, 22.9 Hz). **<sup>13</sup>C NMR** (126 MHz, Chloroform-*d*) δ 193.6 (d, *J* = 6.2 Hz), 166.0, 165.6, 138.0, 134.6, 133.8, 130.0, 128.6, 128.5, 128.1, 81.5 (d, *J* = 177.4 Hz), 75.2 (d, *J* = 20.6 Hz), 52.6; **HRMS** (ESI) *m/z* calcd. for C<sub>18</sub>H<sub>15</sub>O<sub>5</sub>FNa ([M+Na]<sup>+</sup>): 353.0801, found 353.0809; The enantiomeric excess was determined by Chiral HPLC (Chiralpak IB, 0.8 mL/min, *n*-Hexane : <sup>i</sup>PrOH =90:10, Rt (major) 16.69 min, Rt (minor) 18.29 min.

**(S)-1-([1,1'-biphenyl]-4-yl)-3-fluoro-1-oxopropan-2-yl benzoate (2t)**

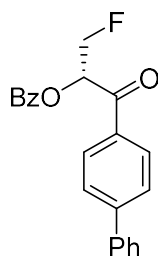

28.6 mg, 82% yield, 94% ee, PE : EA = 50: 1. White solid; m.p.: 105-106 °C;  $[\alpha]_D^{25} = -79.2$  (*c* 1.0, CH<sub>2</sub>Cl<sub>2</sub>); **<sup>1</sup>H NMR** (500 MHz, Chloroform-*d*)  $\delta$  8.03 – 7.87 (m, 4H), 7.56 – 7.49 (m, 2H), 7.46 – 7.36 (m, 3H), 7.27 (td, *J* = 7.6, 3.9 Hz, 4H), 7.24 – 7.19 (m, 1H), 6.22 (dt, *J* = 22.0, 4.5 Hz, 1H), 4.78 (dd, *J* = 47.0, 4.5 Hz, 2H). **<sup>19</sup>F NMR** (470 MHz, Chloroform-*d*)  $\delta$  -228.27 (td, *J* = 47.1, 22.0 Hz). **<sup>13</sup>C NMR** (126 MHz, Chloroform-*d*)  $\delta$  193.4 (d, *J* = 6.5 Hz), 166.3, 147.3, 140.1, 134.3, 133.9, 130.7, 129.8, 129.6, 129.5, 129.1, 129.1, 128.1, 127.9, 82.3 (d, *J* = 177.4 Hz), 75.4 (d, *J* = 20.3 Hz); **HRMS** (ESI) *m/z* calcd. for C<sub>22</sub>H<sub>17</sub>O<sub>3</sub>FNa ([M+Na]<sup>+</sup>): 371.1059, found 371.1064; The enantiomeric excess was determined by Chiral HPLC (Chiralpak IB, 0.8 mL/min, *n*-Hexane : <sup>*i*</sup>PrOH = 90:10, Rt (major) 13.04 min, Rt (minor) 16.67 min.

**(S)-3-fluoro-1-(naphthalen-2-yl)-1-oxopropan-2-yl benzoate (2u)**

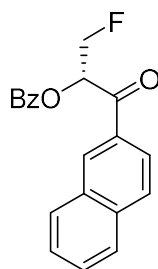

26.1 mg, 81% yield, 91% ee, PE : EA = 50: 1. White solid; m.p.: 85-86 °C;  $[\alpha]_D^{25} = -44.6$  (*c* 1.0, CH<sub>2</sub>Cl<sub>2</sub>); **<sup>1</sup>H NMR** (500 MHz, Chloroform-*d*)  $\delta$  8.40 (s, 1H), 7.94 (d, *J* = 7.7 Hz, 2H), 7.84 (dd, *J* = 8.6, 1.8 Hz, 1H), 7.78 (d, *J* = 8.1 Hz, 1H), 7.73 (d, *J* = 8.7 Hz, 1H), 7.68 (d, *J* = 8.1 Hz, 1H), 7.46 – 7.34 (m, 3H), 7.26 (t, *J* = 7.7 Hz, 2H), 6.35 (dt, *J* = 21.9, 4.5 Hz, 1H), 4.81 (dd, *J* = 47.0, 4.5 Hz, 2H). **<sup>19</sup>F NMR** (470 MHz, Chloroform-*d*)  $\delta$  -228.11 (td, *J* = 46.9, 21.8 Hz). **<sup>13</sup>C NMR** (126 MHz, Chloroform-*d*)  $\delta$  193.8 (d, *J* = 6.6 Hz), 166.3, 136.6, 134.3, 133.0, 132.6, 131.2, 130.7, 130.4, 129.7,

129.5, 129.5, 129.1, 128.4, 127.7, 124.5, 82.4 (d,  $J = 177.8$  Hz), 75.5 (d,  $J = 20.3$  Hz); **HRMS** (ESI)  $m/z$  calcd. for  $C_{20}H_{15}O_3FNa$  ( $[M+Na]^+$ ): 345.0903, found 345.0910; The enantiomeric excess was determined by Chiral HPLC (Chiralpak IB, 0.8 mL/min, *n*-Hexane : *i*PrOH =90:10,  $R_t$  (major) 13.35 min,  $R_t$  (minor) 19.51 min.

### **(S)-3-fluoro-1-(naphthalen-1-yl)-1-oxopropan-2-yl benzoate (2v)**

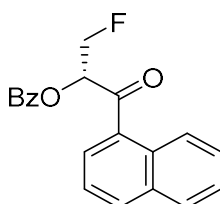

23.2 mg, 72% yield, 96% ee, PE : EA = 50: 1. White solid; m.p.: 94-95 °C;  $[\alpha]_D^{25} = -24.8$  ( $c$  1.0,  $CH_2Cl_2$ );  **$^1H$  NMR** (500 MHz, Chloroform-*d*)  $\delta$  8.34 (d,  $J = 8.4$  Hz, 1H), 8.02 (dd,  $J = 8.0, 1.4$  Hz, 2H), 7.96 – 7.92 (m, 2H), 7.81 (dd,  $J = 8.1, 1.4$  Hz, 1H), 7.55 – 7.43 (m, 4H), 7.37 (t,  $J = 7.8$  Hz, 2H), 6.27 (ddd,  $J = 26.9, 4.6, 2.7$  Hz, 1H), 4.97 – 4.74 (m, 2H).  **$^{19}F$  NMR** (470 MHz, Chloroform-*d*)  $\delta$  -228.45 (td,  $J = 47.2, 27.0$  Hz).  **$^{13}C$  NMR** (126 MHz, Acetonitrile-*d*<sub>3</sub>)  $\delta$  198.6 (d,  $J = 5.3$  Hz), 167.2, 135.5, 135.4, 134.7, 134.6, 131.5, 131.2, 130.7, 130.4, 130.2, 129.6, 129.2, 128.5, 126.5, 126.3, 83.9 (d,  $J = 173.0$  Hz), 79.4 (d,  $J = 19.1$  Hz); **HRMS** (ESI)  $m/z$  calcd. for  $C_{20}H_{15}O_3FNa$  ( $[M+Na]^+$ ): 345.0903, found 345.0910; The enantiomeric excess was determined by Chiral HPLC (Chiralpak IB, 0.8 mL/min, *n*-Hexane : *i*PrOH =90:10,  $R_t$  (major) 12.17 min,  $R_t$  (minor) 15.19 min.

### **(S)-3-fluoro-1-(furan-2-yl)-1-oxopropan-2-yl benzoate (2w)**

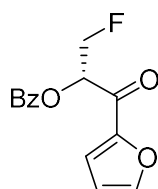

13.9 mg, 53% yield, 70% ee, PE : EA = 50: 1. White solid; m.p.: 69-70 °C;  $[\alpha]_D^{25} = -37.0$  ( $c$  1.0,  $CH_2Cl_2$ );  **$^1H$  NMR** (500 MHz, Chloroform-*d*)  $\delta$  8.13 (ddd,  $J = 11.6, 8.3, 1.4$  Hz, 2H), 7.66 (d,  $J = 1.7$  Hz, 1H), 7.61 (tt,  $J = 7.0, 1.4$  Hz, 1H), 7.48 (t,  $J = 7.8$  Hz,

2H), 7.41 (d,  $J = 3.6$  Hz, 1H), 6.60 (dd,  $J = 3.7, 1.7$  Hz, 1H), 6.17 (ddd,  $J = 22.9, 5.4, 3.0$  Hz, 1H), 5.08 – 4.86 (m, 2H).  $^{19}\text{F}$  NMR (470 MHz, Chloroform- $d$ )  $\delta$  -228.97 (td,  $J = 46.8, 22.9$  Hz).  $^{13}\text{C}$  NMR (126 MHz, Chloroform- $d$ )  $\delta$  180.92 (d,  $J = 6.9$  Hz), 165.62, 150.67, 147.43, 133.70, 130.20, 130.09, 128.85, 128.56, 128.50, 119.64, 112.86, 81.39 (d,  $J = 177.9$  Hz), 75.04 (d,  $J = 20.2$  Hz); HRMS (ESI)  $m/z$  calcd. for  $\text{C}_{14}\text{H}_{11}\text{O}_4\text{NaF}$  ( $[\text{M}+\text{Na}]^+$ ): 285.0539, found 285.0543; The enantiomeric excess was determined by Chiral HPLC (Chiralpak IB, 0.8 mL/min,  $n$ -Hexane :  $i$ PrOH =90:10,  $R_t$  (major) 13.07 min,  $R_t$  (minor) 17.35 min.

**(*S*)-1-(5-bromofuran-2-yl)-3-fluoro-1-oxopropan-2-yl benzoate (2x)**

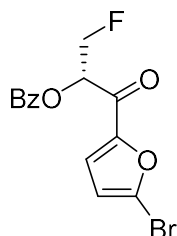

14.3 mg, 42% yield, 79% ee, PE : EA = 50: 1. White solid; m.p.: 62-63 °C;  $[\alpha]_{\text{D}}^{25} = -36.8$  ( $c$  1.0,  $\text{CH}_2\text{Cl}_2$ );  $^1\text{H}$  NMR (500 MHz, Chloroform- $d$ )  $\delta$  8.13 (d,  $J = 7.7$  Hz, 2H), 7.62 (t,  $J = 7.5$  Hz, 1H), 7.48 (t,  $J = 7.7$  Hz, 2H), 7.33 (d,  $J = 3.7$  Hz, 1H), 6.54 (d,  $J = 3.6$  Hz, 1H), 6.09 (ddd,  $J = 23.2, 5.2, 3.1$  Hz, 1H), 5.08 – 4.84 (m, 2H).  $^{19}\text{F}$  NMR (470 MHz, Chloroform- $d$ )  $\delta$  -229.20 (td,  $J = 46.8, 23.3$  Hz).  $^{13}\text{C}$  NMR (126 MHz, Chloroform- $d$ )  $\delta$  179.8 (d,  $J = 6.7$  Hz), 165.6, 152.3, 133.8, 130.1, 129.9, 128.7, 128.6, 121.6, 115.0, 81.3 (d,  $J = 177.9$  Hz), 74.8 (d,  $J = 20.4$  Hz); HRMS (ESI)  $m/z$  calcd. for  $\text{C}_{14}\text{H}_{10}\text{O}_4\text{FNaBr}$  ( $[\text{M}+\text{Na}]^+$ ): 362.9644, found 362.9652; The enantiomeric excess was determined by Chiral HPLC (Chiralpak IB, 0.8 mL/min,  $n$ -Hexane :  $i$ PrOH =99:1,  $R_t$  (major) 19.69 min,  $R_t$  (minor) 23.27 min.

**(S)-1-(benzofuran-2-yl)-3-fluoro-1-oxopropan-2-yl benzoate (2y)**

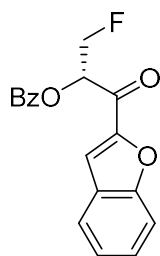

17.2 mg, 55% yield, 76% ee, PE : EA = 50: 1. White solid; m.p.: 91-92 °C;  $[\alpha]_{\text{D}}^{25} = -113.8$  (*c* 1.0, CH<sub>2</sub>Cl<sub>2</sub>); **<sup>1</sup>H NMR** (400 MHz, Chloroform-*d*)  $\delta$  8.16 (d, *J* = 7.7 Hz, 2H), 7.74 (t, *J* = 4.1 Hz, 2H), 7.61 (dd, *J* = 16.4, 8.3 Hz, 2H), 7.51 (dt, *J* = 15.2, 7.4 Hz, 3H), 7.34 (t, *J* = 7.5 Hz, 1H), 6.31 (ddd, *J* = 23.1, 5.5, 3.1 Hz, 1H), 5.06 (dddd, *J* = 46.7, 24.4, 10.5, 4.3 Hz, 2H). **<sup>19</sup>F NMR** (470 MHz, Chloroform-*d*)  $\delta$  -228.94 (td, *J* = 46.8, 23.1 Hz). **<sup>13</sup>C NMR** (126 MHz, Chloroform-*d*)  $\delta$  183.1 (d, *J* = 6.9 Hz), 165.6, 155.9, 150.4, 133.8, 130.1, 129.2, 128.8, 128.6, 126.8, 124.3, 123.7, 115.3, 112.6, 81.3 (d, *J* = 177.9 Hz), 75.3 (d, *J* = 20.3 Hz); **HRMS** (ESI) *m/z* calcd. for C<sub>18</sub>H<sub>13</sub>O<sub>4</sub>FNa ([M+Na]<sup>+</sup>): 335.0696, found 335.0704; The enantiomeric excess was determined by Chiral HPLC (Chiralpak IB, 0.8 mL/min, *n*-Hexane : <sup>i</sup>PrOH = 90:10, *R*<sub>t</sub> (major) 12.28 min, *R*<sub>t</sub> (minor) 14.42 min.

**(S)-3-fluoro-1-oxo-1-(thiophen-2-yl)propan-2-yl benzoate (2z)**

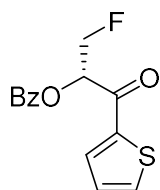

18.4 mg, 66% yield, 90% ee, PE : EA = 50: 1. White solid; m.p.: 56-57 °C;  $[\alpha]_{\text{D}}^{25} = -28.0$  (*c* 1.0, CH<sub>2</sub>Cl<sub>2</sub>); **<sup>1</sup>H NMR** (500 MHz, Chloroform-*d*)  $\delta$  8.14 (d, *J* = 7.6 Hz, 2H), 7.95 (d, *J* = 3.9 Hz, 1H), 7.73 (d, *J* = 4.9 Hz, 1H), 7.62 (t, *J* = 7.4 Hz, 1H), 7.48 (t, *J* = 7.6 Hz, 2H), 7.17 (t, *J* = 4.4 Hz, 1H), 6.16 (ddd, *J* = 21.4, 5.6, 3.4 Hz, 1H), 5.06 – 4.86 (m, 2H). **<sup>19</sup>F NMR** (470 MHz, Chloroform-*d*)  $\delta$  -228.42 (tdd, *J* = 46.8, 21.3, 3.1 Hz). **<sup>13</sup>C NMR** (126 MHz, Chloroform-*d*)  $\delta$  185.8 (d, *J* = 6.7 Hz), 165.6, 140.8, 135.4, 133.8, 133.6, 130.1, 128.8, 128.6, 128.5, 81.9 (d, *J* = 178.3 Hz), 75.6 (d, *J* = 20.6 Hz); **HRMS**

(ESI)  $m/z$  calcd. for  $C_{14}H_{11}O_3FNaS$  ( $[M+Na]^+$ ): 301.0311, found 301.0320; The enantiomeric excess was determined by Chiral HPLC (Chiralpak IB, 0.8 mL/min, *n*-Hexane : *i*PrOH =90:10,  $R_t$  (major) 11.95 min,  $R_t$  (minor) 16.64 min.

**(S)-1-fluoro-3-oxo-5-phenylpent-4-en-2-yl benzoate (2a')**

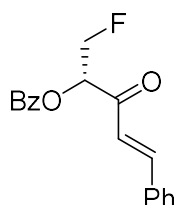

20.0 mg, 67% yield, 71% ee, PE : EA = 50: 1. White solid; m.p.: 70-71 °C;  $[\alpha]_D^{25} = -366.4$  (*c* 1.0,  $CH_2Cl_2$ );  $^1H$  NMR (500 MHz, Chloroform-*d*)  $\delta$  7.99 (dd,  $J = 8.3, 1.4$  Hz, 2H), 7.63 (d,  $J = 15.8$  Hz, 1H), 7.45 (td,  $J = 7.3, 1.5$  Hz, 1H), 7.39 – 7.35 (m, 2H), 7.32 (t,  $J = 7.8$  Hz, 2H), 7.24 – 7.19 (m, 3H), 6.84 (d,  $J = 15.8$  Hz, 1H), 5.59 (ddd,  $J = 25.3, 4.9, 2.9$  Hz, 1H), 4.87 – 4.63 (m, 2H).  $^{19}F$  NMR (470 MHz, Chloroform-*d*)  $\delta$  -230.41 (td,  $J = 47.0, 25.3$  Hz).  $^{13}C$  NMR (126 MHz, Acetonitrile-*d*<sub>3</sub>)  $\delta$  192.5 (d,  $J = 6.0$  Hz), 166.0, 145.1, 134.8, 134.3, 131.7, 130.2, 129.8, 129.6, 129.4, 129.4, 121.9, 82.5 (d,  $J = 172.8$  Hz), 78.4 (d,  $J = 19.1$  Hz); HRMS (ESI)  $m/z$  calcd. for  $C_{18}H_{15}O_3FNa$  ( $[M+Na]^+$ ): 321.0903, found 321.0911; The enantiomeric excess was determined by Chiral HPLC (Chiralpak IB, 0.8 mL/min, *n*-Hexane : *i*PrOH =90:10,  $R_t$  (major) 12.50 min,  $R_t$  (minor) 16.39 min.

**(S)-1-cyclopropyl-3-fluoro-1-oxopropan-2-yl benzoate (2b')**

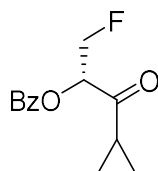

13.9 mg, 59% yield, 64% ee, PE : EA = 50: 1. White solid; m.p.: 63-64 °C;  $[\alpha]_D^{25} = -23.0$  (*c* 1.0,  $CH_2Cl_2$ );  $^1H$  NMR (500 MHz, Chloroform-*d*)  $\delta$  8.08 (dt,  $J = 8.5, 1.6$  Hz, 2H), 7.55 (td,  $J = 7.2, 1.4$  Hz, 1H), 7.41 (t,  $J = 7.8$  Hz, 2H), 5.56 (ddd,  $J = 27.5, 4.6, 2.7$  Hz, 1H), 4.95 – 4.70 (m, 2H), 2.15 (ddd,  $J = 7.9, 4.6, 3.3$  Hz, 1H), 1.19 – 1.11 (m, 1H),



1.06 (dtd,  $J = 10.6, 4.7, 2.1$  Hz, 1H), 1.01 – 0.87 (m, 2H).  $^{19}\text{F}$  NMR (470 MHz, Chloroform- $d$ )  $\delta$  -230.29 (td,  $J = 47.5, 27.6$  Hz).  $^{13}\text{C}$  NMR (126 MHz, Chloroform- $d$ )  $\delta$  203.2 (d,  $J = 5.3$  Hz), 164.6, 132.7, 129.0, 127.9, 127.6, 80.7 (d,  $J = 176.1$  Hz), 77.3 (d,  $J = 19.6$  Hz), 16.7, 11.5, 11.0; HRMS (ESI)  $m/z$  calcd. for  $\text{C}_{13}\text{H}_{13}\text{O}_3\text{FNa}$  ( $[\text{M}+\text{Na}]^+$ ): 259.0746, found 259.0749; The enantiomeric excess was determined by Chiral HPLC (Chiralpak IB, 0.8 mL/min,  $n$ -Hexane :  $i$ PrOH =90:10,  $R_t$  (major) 8.95 min,  $R_t$  (minor) 9.56 min.

### (*S*)-1-fluoro-3-oxohexan-2-yl benzoate (2c')

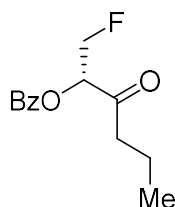

9.1 mg, 38% yield, 66% ee, PE : EA = 50 : 1. White solid; m.p.: 95-96 °C;  $[\alpha]_{\text{D}}^{25} = -17.4$  ( $c$  1.0,  $\text{CH}_2\text{Cl}_2$ );  $^1\text{H}$  NMR (500 MHz, Chloroform- $d$ )  $\delta$  8.14 (dd,  $J = 8.5, 1.3$  Hz, 2H), 7.67 – 7.60 (m, 1H), 7.50 (t,  $J = 7.8$  Hz, 2H), 5.51 (ddd,  $J = 28.7, 4.1, 2.7$  Hz, 1H), 5.02 – 4.71 (m, 2H), 2.70 – 2.47 (m, 2H), 1.66 (hd,  $J = 7.3, 2.4$  Hz, 2H), 0.93 (t,  $J = 7.4$  Hz, 3H).  $^{19}\text{F}$  NMR (470 MHz, Chloroform- $d$ )  $\delta$  -231.05 – -231.40 (m).  $^{13}\text{C}$  NMR (126 MHz, Chloroform- $d$ )  $\delta$  204.0 (d,  $J = 4.6$  Hz), 164.7, 132.8, 129.0, 127.9, 127.6, 81.0 (d,  $J = 175.2$  Hz), 76.8 (d,  $J = 19.8$  Hz), 40.5, 15.2, 12.5; HRMS (ESI)  $m/z$  calcd. for  $\text{C}_{13}\text{H}_{15}\text{O}_3\text{FNa}$  ( $[\text{M}+\text{Na}]^+$ ): 261.0903, found 261.0909; The enantiomeric excess was determined by Chiral HPLC (Chiralpak IB, 0.8 mL/min,  $n$ -Hexane :  $i$ PrOH =90:10,  $R_t$  (major) 7.96 min,  $R_t$  (minor) 8.43 min.

### (*S*)-1-fluoro-3-oxononan-2-yl benzoate (2d')

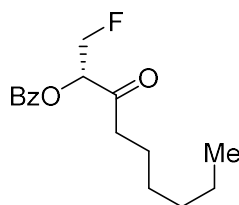

10.9 mg, 39% yield, 54% ee, PE : EA = 50 : 1. White solid; m.p.: 43-44 °C;  $[\alpha]_{\text{D}}^{25} = -$

46.6 (*c* 1.0, CH<sub>2</sub>Cl<sub>2</sub>); **<sup>1</sup>H NMR** (500 MHz, Chloroform-*d*) δ 8.17 – 8.11 (m, 2H), 7.63 (td, *J* = 7.3, 1.5 Hz, 1H), 7.57 – 7.43 (m, 2H), 5.51 (ddd, *J* = 28.7, 4.1, 2.6 Hz, 1H), 4.86 (dddd, *J* = 72.1, 47.8, 10.4, 3.4 Hz, 2H), 2.74 – 2.45 (m, 2H), 1.61 (dp, *J* = 10.8, 7.0 Hz, 2H), 1.33 – 1.23 (m, 6H), 0.86 (t, *J* = 6.8 Hz, 3H). **<sup>19</sup>F NMR** (470 MHz, Chloroform-*d*) δ -231.13 (td, *J* = 47.1, 28.7 Hz). **<sup>13</sup>C NMR** (126 MHz, Chloroform-*d*) δ 205.1 (d, *J* = 4.6 Hz), 165.7, 133.8, 130.0, 128.9, 128.7, 82.0 (d, *J* = 175.4 Hz), 77.8 (d, *J* = 19.8 Hz), 39.7, 31.6, 28.7, 22.8, 22.4, 14.0.; **HRMS** (ESI) *m/z* calcd. for C<sub>16</sub>H<sub>21</sub>O<sub>3</sub>FNa ([M+Na]<sup>+</sup>): 303.1372, found 303.1380; The enantiomeric excess was determined by Chiral HPLC (Chiralpak IB, 0.8 mL/min, *n*-Hexane : *i*PrOH =99:1, Rt (major) 7.17 min, Rt (minor) 7.68 min.

### **(*S*)-1-fluoro-3-oxo-5-phenylpentan-2-yl benzoate (2e')**

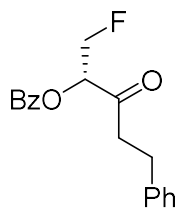

19.2 mg, 64% yield, 54% ee, PE : EA = 50: 1. White solid; m.p.: 47-48 °C; [ $\alpha$ ]<sub>D</sub><sup>25</sup> = -12.0 (*c* 1.0, CH<sub>2</sub>Cl<sub>2</sub>); **<sup>1</sup>H NMR** (500 MHz, Chloroform-*d*) δ 7.98 (dd, *J* = 8.3, 1.5 Hz, 2H), 7.49 (td, *J* = 7.4, 1.5 Hz, 1H), 7.35 (t, *J* = 7.8 Hz, 2H), 7.13 (t, *J* = 7.5 Hz, 2H), 7.04 (dd, *J* = 7.2, 5.5 Hz, 3H), 5.38 (ddd, *J* = 28.5, 4.0, 2.6 Hz, 1H), 4.70 (dddd, *J* = 73.5, 47.8, 10.5, 3.3 Hz, 2H), 2.92 – 2.70 (m, 4H). **<sup>19</sup>F NMR** (470 MHz, Chloroform-*d*) δ -231.19 (td, *J* = 47.2, 28.6 Hz). **<sup>13</sup>C NMR** (126 MHz, Chloroform-*d*) δ 205.0 (d, *J* = 4.6 Hz), 166.4, 141.2, 134.6, 130.8, 129.5, 129.4, 129.3, 129.1, 127.0, 82.7 (d, *J* = 175.5 Hz), 78.6 (d, *J* = 19.8 Hz), 42.1, 29.6; **HRMS** (ESI) *m/z* calcd. for C<sub>18</sub>H<sub>17</sub>O<sub>3</sub>FNa ([M+Na]<sup>+</sup>): 323.1059, found 323.1050; The enantiomeric excess was determined by Chiral HPLC (Chiralpak IB, 0.8 mL/min, *n*-Hexane : *i*PrOH =90:10, Rt (major) 8.18 min, Rt (minor) 10.15 min.

**(S)-1-(6-(3-adamantan-1-yl)-4-methoxyphenyl)naphthalen-2-yl)-3-fluoro-1-oxopropan-2-yl benzoate e (2f')**

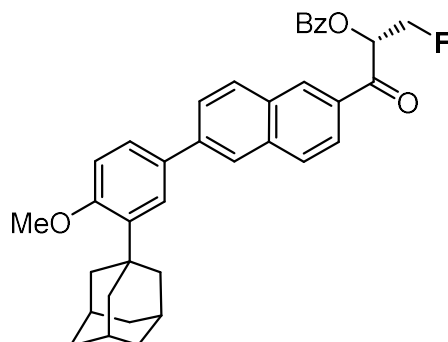

43.3 mg, 77% yield, 82% ee, PE : EA = 50: 1. White solid; m.p.: 302-303 °C;  $[\alpha]_D^{25} = -65.2$  (*c* 1.0, CH<sub>2</sub>Cl<sub>2</sub>); **<sup>1</sup>H NMR** (400 MHz, Chloroform-*d*) δ 8.58 (s, 1H), 8.14 (d, *J* = 7.7 Hz, 2H), 8.06 – 7.91 (m, 4H), 7.82 (dd, *J* = 8.5, 1.7 Hz, 1H), 7.65 – 7.51 (m, 3H), 7.46 (t, *J* = 7.7 Hz, 2H), 6.99 (d, *J* = 8.4 Hz, 1H), 6.55 (dt, *J* = 21.7, 4.6 Hz, 1H), 5.00 (dd, *J* = 47.0, 4.5 Hz, 2H), 3.90 (s, 3H), 2.18 (s, 6H), 2.10 (s, 3H), 1.80 (s, 6H). **<sup>19</sup>F NMR** (376 MHz, Chloroform-*d*) δ -227.82 (td, *J* = 46.8, 21.7 Hz). **<sup>13</sup>C NMR** (101 MHz, Chloroform-*d*) δ 191.9 (d, *J* = 6.8 Hz), 164.7, 158.1, 141.2, 138.0, 135.4, 132.6, 131.2, 130.4, 130.1, 129.4, 129.1, 129.0, 127.9, 127.9, 127.5, 125.8, 124.9, 124.7, 123.7, 123.2, 111.1, 80.8 (d, *J* = 177.6 Hz), 73.8 (d, *J* = 20.2 Hz), 54.1, 52.4, 39.6, 36.2, 36.08, 28.1; **HRMS** (ESI) *m/z* calcd. for C<sub>37</sub>H<sub>35</sub>O<sub>4</sub>FN<sub>a</sub> ([*M*+Na]<sup>+</sup>): 585.2417, found 585.2421; The enantiomeric excess was determined by Chiral HPLC (Chiralpak IA, 0.8 mL/min, *n*-Hexane : *i*-PrOH =90:10, *R<sub>t</sub>* (major) 13.89 min, *R<sub>t</sub>* (minor) 17.65 min.

**Selected results of unsuccessful substrates**

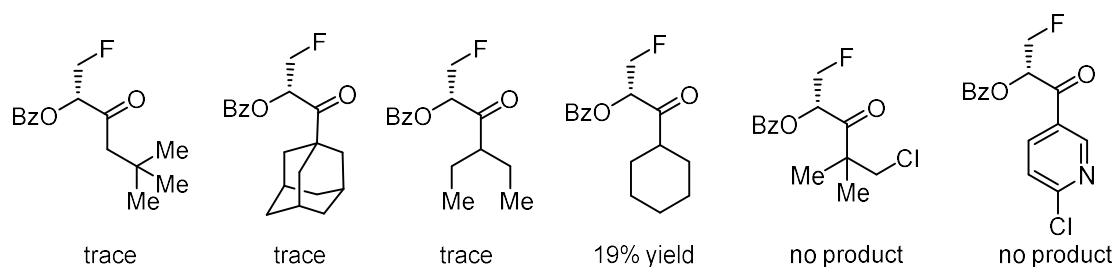

## 6 Gram-Scale Reaction

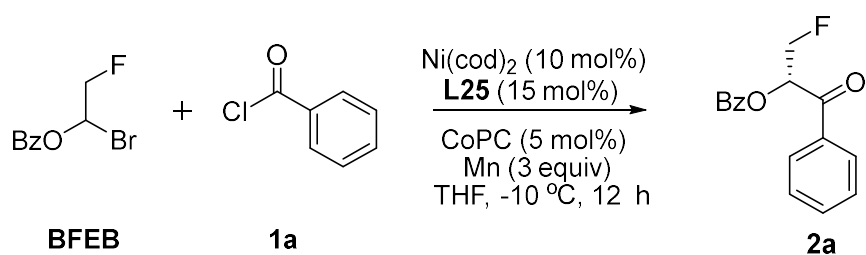

In a glove box,  $\text{Ni}(\text{cod})_2$  (95.2 mg, 0.34 mmol, 10 mol%), and **L1** (0.43g, 0.51 mmol, 15 mol%) were added into a 100 mL Schlenk flask equipped with a stirring bar in 34 mL Tetrahydrofuran (THF). The mixture was stirred at room temperature for 30 mins, then brominated fluoroethanol benzoate (**BFEB**) (1.00 g, 4.08 mmol, 1.2 equiv.), benzoyl chloride **1a** (0.48 g, 3.4 mmol, 1.0 equiv.),  $\text{Mn}$  (0.56 g, 10.2 mmol, 3 equiv.), cobalt(II) phthalocyanine ( $\text{CoPc}$ ) (98.6 mg, 0.17 mmol, 5 mol%) was added and keep stirring at  $-10\text{ }^\circ\text{C}$  for 12 hours. After evaporation under reduced pressure to remove the solvent, the mixture was passed through a short column of silica gel to remove the metal complex. The residue was purified by flash chromatography on silica gel (PE : EA = 50: 1) to afford the desired product **2a** (0.66 g, 72% yield, 91% ee).

## 7 Synthesis Transformation

### 7.1 Reduction of ketone group

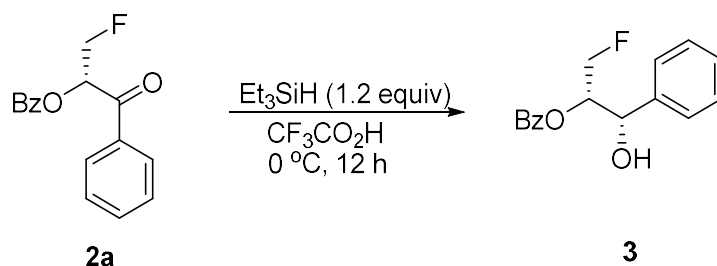

To a solution of **2a** (27.2 mg, 0.1 mmol, 1.0 equiv.) in 1 mL  $\text{CF}_3\text{CO}_2\text{H}$ ,  $\text{Et}_3\text{SiH}$  (14.0 mg, 0.12 mmol, 1.2 equiv.) was added. The mixture was stirred at 0 °C for 12 hours. The reaction was quenched by water, and the aqueous phase was extracted with  $\text{CH}_2\text{Cl}_2$  three times. The combined organic layers were washed with brine, dried over sodium sulfate and concentrated under reduced pressure. The crude product was purified by column chromatography on silica gel (PE : EA = 20: 1) to give pure product **3** (17.6 mg, 64% yield, 37:1 dr, 95% ee).<sup>[4]</sup>

#### (1*S*,2*S*)-3-fluoro-1-hydroxy-1-phenylpropan-2-yl benzoate (**3**)

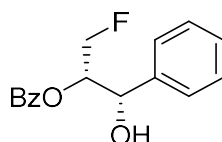

17.6 mg, 64% yield, 37:1 dr, 95% ee, PE : EA = 20: 1. White solid; m.p.: 63-64 °C;  $[\alpha]_{\text{D}}^{25} = -33.6$  ( $c$  1.0,  $\text{CH}_2\text{Cl}_2$ ); **<sup>1</sup>H NMR** (500 MHz, Chloroform-*d*)  $\delta$  7.90 (dd,  $J = 8.3$ , 1.4 Hz, 2H), 7.51 – 7.44 (m, 1H), 7.40 – 7.30 (m, 4H), 7.27 (dd,  $J = 8.3$ , 6.6 Hz, 2H), 7.23 – 7.19 (m, 1H), 5.38 (dddd,  $J = 22.2$ , 6.1, 5.1, 2.6 Hz, 1H), 5.06 (d,  $J = 6.1$  Hz, 1H), 4.86 – 4.52 (m, 2H), 2.61 (s, 1H). **<sup>19</sup>F NMR** (470 MHz, Chloroform-*d*)  $\delta$  -235.21 (td,  $J = 47.4$ , 22.4 Hz). **<sup>13</sup>C NMR** (126 MHz, Chloroform-*d*)  $\delta$  164.8, 138.5, 132.3, 128.7, 128.5, 127.8, 127.6, 127.4, 125.4, 80.3 (d,  $J = 171.9$  Hz), 75.0 (d,  $J = 18.1$  Hz), 71.4 (d,  $J = 7.0$  Hz); **HRMS** (ESI)  $m/z$  calcd. for  $\text{C}_{16}\text{H}_{15}\text{O}_3\text{FNa}$  ( $[\text{M}+\text{Na}]^+$ ): 297.0903, found 297.0906; The enantiomeric excess was determined by Chiral HPLC (Chiralpak IA, 0.4 mL/min, *n*-Hexane : *i*PrOH = 90:10,  $R_t$  (major) 23.77 min,  $R_t$  (minor) 26.26 min.

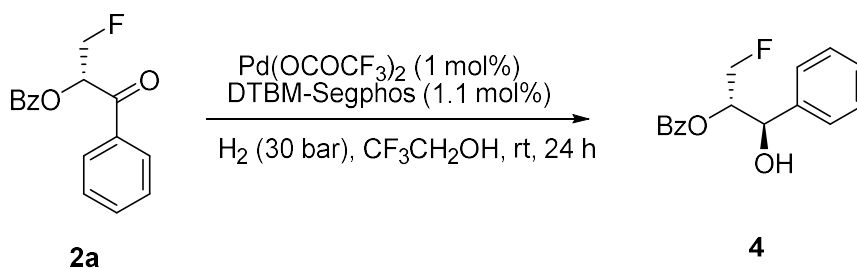

In a glove box, **2a** (27.2 mg, 0.1 mmol, 1.0 equiv.), (*R*)-DTBM-SegPHOS (1.3 mg, 1.1 mol%) and  $\text{Pd}(\text{OCOCF}_3)_2$  (0.33 mg, 1.0 mol%) were added into a Teflon reaction tube in 1 mL trifluoroethanol (TFE). Then the tube was transferred into a stainless-steel autoclave which was attached to the high-pressure hydrogen cylinders, and the system was purged three times with hydrogen to remove argon. Then the autoclave was charged with hydrogen (30 bar). The reaction was stirred at room temperature for 24 h. The hydrogen gas was released slowly and carefully in a fume hood. After evaporation under reduced pressure to remove the solvent, the mixture was passed through a short column of silica gel to remove the metal complex. The residue was purified by flash chromatography on silica gel (PE : EA = 20 : 1) to afford the desired product **4** (13.4 mg, 50% yield, 5:1 dr, 96% ee).<sup>[5]</sup>

### (1*R*,2*S*)-3-fluoro-1-hydroxy-1-phenylpropan-2-yl benzoate (**4**)

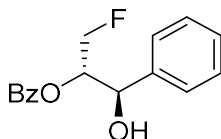

13.4 mg, 50% yield, 5:1 dr, 96% ee, PE : EA = 20: 1. White solid; m.p.: 63-64 °C;  $[\alpha]_D^{25} = -12.8$  (*c* 1.0,  $\text{CH}_2\text{Cl}_2$ ); **<sup>1</sup>H NMR** (500 MHz, Chloroform-*d*)  $\delta$  8.01 (dd, *J* = 8.0, 1.6 Hz, 2H), 7.53 – 7.49 (m, 1H), 7.41 – 7.34 (m, 4H), 7.29 (dd, *J* = 8.2, 6.2 Hz, 2H), 7.27 – 7.24 (m, 1H), 5.41 – 5.30 (m, 1H), 5.04 (d, *J* = 7.3 Hz, 1H), 4.40 (dddd, *J* = 129.7, 46.8, 10.5, 3.6 Hz, 2H), 2.52 (s, 1H). **<sup>19</sup>F NMR** (470 MHz, Chloroform-*d*)  $\delta$  -233.93 (tdd, *J* = 47.4, 23.9, 5.5 Hz). **<sup>13</sup>C NMR** (126 MHz, Chloroform-*d*)  $\delta$  164.8, 138.5, 132.3, 128.7, 128.5, 127.8, 127.6, 127.4, 125.4, 80.3 (d, *J* = 171.9 Hz), 75.0 (d, *J* = 18.1 Hz), 71.4 (d, *J* = 7.0 Hz); **HRMS** (ESI) *m/z* calcd. for  $\text{C}_{16}\text{H}_{15}\text{O}_3\text{FNa}$  ( $[\text{M}+\text{Na}]^+$ ): 297.0903, found 297.0906; The enantiomeric excess was determined by Chiral HPLC (Chiralpak IA, 0.4 mL/min, *n*-Hexane : *i*PrOH = 90:10, *R*<sub>t</sub> (major) 27.32 min, *R*<sub>t</sub> (minor)

28.62 min.

## 7.2 Wittig reaction

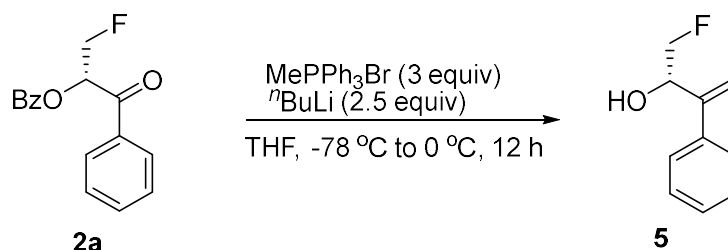

An oven-dried flask was charged with methyltriphenylphosphonium bromide (107.2 mg, 0.30 mmol, 3.0 equiv.), and THF (0.50 mL) was added under N<sub>2</sub> atmosphere. The resulting suspension was cooled to -78 °C, and n-BuLi (0.11 mL, 0.25 mmol, 2.5 equiv, 2.5 M solution in hexanes) was added dropwise. After the resulting orange solution was stirred for 30 mins, a solution of **2a** (27.2 mg, 0.1 mmol, 1.0 equiv.) in THF (0.25 mL) was added to the reaction mixture. The reaction was stirred at 0 °C for 12 hours. The reaction was quenched with saturated aqueous NH<sub>4</sub>Cl solution. The aqueous layer was extracted with ethyl acetate (3 × 2.0 mL) and the combined organic layers were washed with brine, dried over anhydrous Na<sub>2</sub>SO<sub>4</sub> and concentrated in vacuo. The product was purified by flash column chromatography on silica (PE : EA = 20 : 1) to give compound **5** (11.1 mg, 67% yield, 91% ee).<sup>[6]</sup>

### (*S*)-1-fluoro-3-phenylbut-3-en-2-ol (**5**)

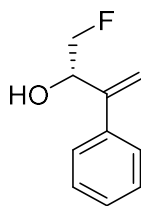

11.1 mg, 67% yield, 91% ee, PE : EA = 20: 1. White solid; m.p.: 79-80 °C;  $[\alpha]_D^{25} = -156.4$  (*c* 1.0, CH<sub>2</sub>Cl<sub>2</sub>); <sup>1</sup>H NMR (500 MHz, Chloroform-*d*) δ 7.33 – 7.21 (m, 5H), 5.43 (dt, *J* = 27.5, 1.2 Hz, 2H), 4.90 (dd, *J* = 16.7, 7.3 Hz, 1H), 4.45 – 4.11 (m, 2H), 2.32 (d, *J* = 3.7 Hz, 1H). <sup>19</sup>F NMR (470 MHz, Chloroform-*d*) δ -224.34 (td, *J* = 47.7, 16.9 Hz). <sup>13</sup>C NMR (126 MHz, Chloroform-*d*) δ 145.0 (d, *J* = 7.9 Hz), 138.0, 127.6, 127.1, 125.6, 114.1, 85.0 (d, *J* = 172.8 Hz), 71.4 (d, *J* = 19.8 Hz); HRMS (ESI) *m/z* calcd. for

C<sub>10</sub>H<sub>11</sub>OFK ([M+K]<sup>+</sup>): 205.0431, found 205.0436; The enantiomeric excess was determined by Chiral HPLC (Chiralpak IA, 0.8 mL/min, *n*-Hexane : *i*PrOH =90:10, Rt (major) 9.36 min, Rt (minor) 8.09 min.

### 7.3 Baeyer-Villiger oxidation

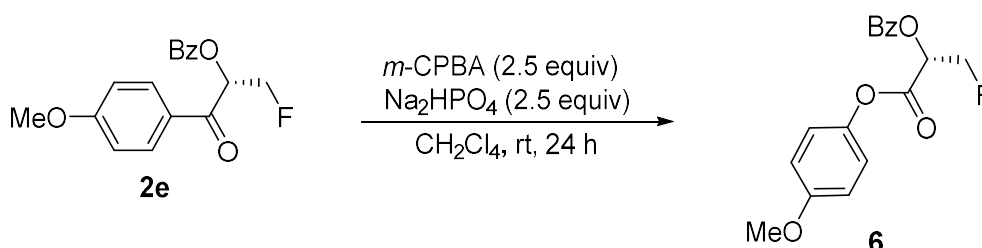

To a solid of **2e** (30.2 mg, 0.1 mmol, 1.0 equiv.) in CH<sub>2</sub>Cl<sub>2</sub> (1 mL), was added *m*-CPBA (43.1 mg, 0.25 mmol, 2.5 equiv.) and Na<sub>2</sub>HPO<sub>4</sub> (35.6 mg, 0.25 mmol, 2.5 equiv.) at room temperature. After being stirred at room temperature for 24 h, the mixture was poured into water (3.0 mL) and saturated sodium hydrogen carbonate (3.0 mL), the organic layer was separated and the aqueous phase was extracted with CH<sub>2</sub>Cl<sub>2</sub> (3 × 2.0 mL). The combined organic layers were washed with saturated brine, dried over MgSO<sub>4</sub> and concentrated under reduced pressure. The residue was purified by column chromatography on silica gel (eluting with petroleum ether/ethyl acetate) to give product **6** (26.7 mg, 84% yield, 88% ee).<sup>[7]</sup>

#### (*S*)-3-fluoro-1-(4-methoxyphenoxy)-1-oxopropan-2-yl benzoate(**6**)

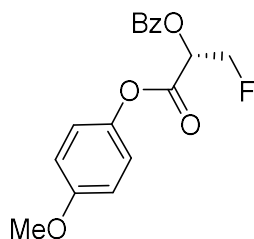

26.7 mg, 84% yield, 88% ee, PE : EA = 20: 1. White solid; m.p.: 97-98 °C; [ $\alpha$ ]<sub>D</sub><sup>25</sup> = -57.3 (*c* 1.0, CH<sub>2</sub>Cl<sub>2</sub>); <sup>1</sup>H NMR (500 MHz, Chloroform-*d*)  $\delta$  8.19 – 8.13 (m, 2H), 7.65 – 7.58 (m, 1H), 7.48 (t, *J* = 7.8 Hz, 2H), 7.07 – 7.04 (m, 2H), 6.90 – 6.87 (m, 2H), 5.76 (ddd, *J* = 27.4, 4.5, 2.4 Hz, 1H), 5.20 – 4.87 (m, 2H), 3.79 (s, 3H). <sup>19</sup>F NMR (470 MHz, Chloroform-*d*)  $\delta$  -229.26 (td, *J* = 46.9, 27.1 Hz). <sup>13</sup>C NMR (126 MHz, Chloroform-*d*)  $\delta$  164.66, 164.62 (d, *J* = 7.9 Hz), 156.63, 142.58, 132.74, 129.09, 127.73, 127.53, 121.01, 113.51, 80.77 (d, *J* = 177.6 Hz), 70.94 (d, *J* = 20.2 Hz), 54.58. ; HRMS (ESI)



$m/z$  calcd. For  $C_{17}H_{15}O_5FNa$  ( $[M+Na]^+$ ): 341.0801, found 341.0795; The enantiomeric excess was determined by Chiral HPLC (Chiralpak IB, 0.8 mL/min, *n*-Hexane : *i*-PrOH = 90:10, Rt (major) 10.71 min, Rt (minor) 12.25 min.

## 8 Mechanistic Studies

### 8.1 Radical Trapping Experiment

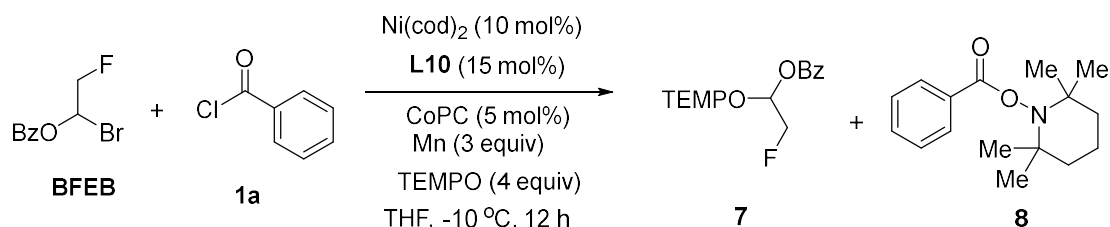

In a glove box,  $\text{Ni}(\text{cod})_2$  (2.8 mg, 0.01 mmol, 10 mol%), and **L10** (12.6 mg, 0.015 mmol, 15 mol%) were added into a 4 mL glass bottle in 1 mL Tetrahydrofuran (THF). The mixture was stirred at room temperature for 30 mins, then brominated fluoroethanol benzoate (**BFEb**) (29.6 mg, 0.12 mmol, 1.2 equiv.), benzoyl chloride **1a** (14.1 mg, 0.1 mmol, 1.0 equiv.), Mn (16.5 mg, 0.3 mmol, 3 equiv.), cobalt(II) phthalocyanine (CoPc) (2.9 mg, 0.005 mmol, 5 mol%) and TEMPO (62.5 mg, 0.4 mmol, 4.0 equiv) was added and keep stirring at  $-10\text{ }^\circ\text{C}$  for 12 hours. After evaporation under reduced pressure to remove the solvent, the mixture was passed through a short column of silica gel to remove the metal complex. The residue was purified by flash chromatography on silica gel (PE : EA = 50: 1) to afford the desired product **8** (11.5 mg, 44% yield). Product **7** was evidently detected by HRMS and GCMS.

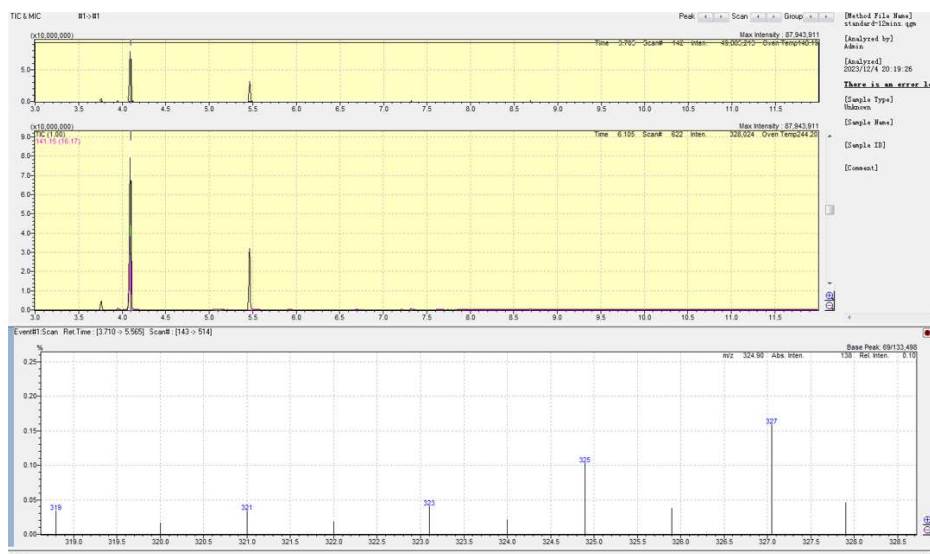

Figure S1. GC-MS data for **7**

## Single Mass Analysis

Tolerance = 5.0 mDa / DBE: min = -1.5, max = 50.0

Element prediction: Off

Number of isotope peaks used for i-FIT = 3

Monoisotopic Mass, Even Electron Ions

1321 formula(e) evaluated with 1 results within limits (up to 50 best isotopic matches for each mass)

Elements Used:

C: 18-18 H: 27-27 N: 0-100 O: 0-100 F: 1-4 Na: 0-1

37

240117-9-287-1 10 (0.072)

1: TOF MS ES+  
2.45e+002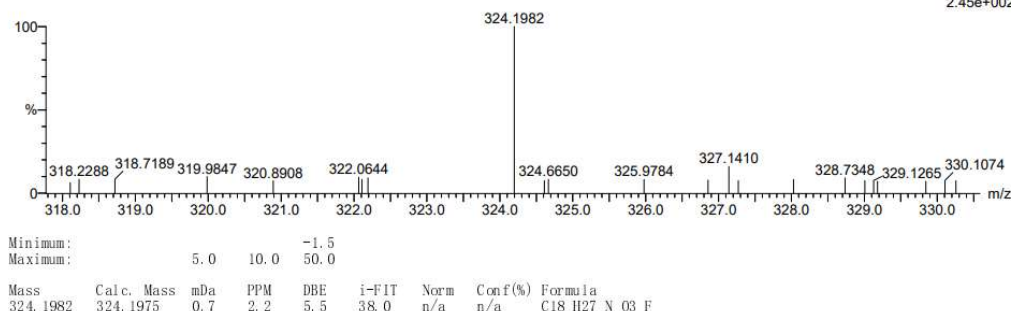

Figure S2. HRMS data for 7.

**2,2,6,6-tetramethylpiperidin-1-yl benzoate (8)**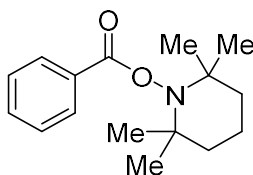

11.5 mg, 44% yield, PE : EA = 50: 1. White solid; m.p.: 83-84 °C;  $^1\text{H NMR}$  (500 MHz, Chloroform-*d*)  $\delta$  8.00 (d,  $J = 8.0$  Hz, 2H), 7.53 – 7.46 (m, 1H), 7.39 (t,  $J = 7.6$  Hz, 2H), 1.70 (dt,  $J = 14.9, 12.0$  Hz, 2H), 1.62 (d,  $J = 13.3$  Hz, 1H), 1.51 (dt,  $J = 12.5, 2.8$  Hz, 2H), 1.39 (dt,  $J = 13.2, 3.4$  Hz, 1H), 1.20 (s, 6H), 1.05 (s, 6H).  $^{13}\text{C NMR}$  (126 MHz, Chloroform-*d*)  $\delta$  165.4, 131.8, 128.7, 128.5, 127.4, 59.4, 38.1, 31.0, 19.8, 16.0; **HRMS** (ESI)  $m/z$  calcd. for  $\text{C}_{16}\text{H}_{23}\text{NO}_2\text{Na}$  ( $[\text{M}+\text{Na}]^+$ ): 284.1626, found 284.1631.

## 8.2 EPR Experiment

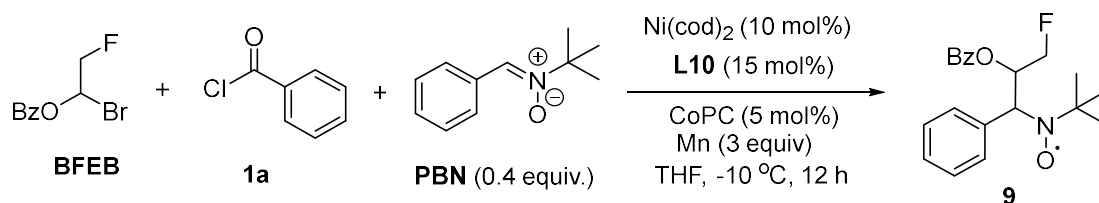

In a glove box,  $\text{Ni}(\text{cod})_2$  (2.8 mg, 0.01 mmol, 10 mol%), and **L10** (12.6 mg, 0.015 mmol, 15 mol%) were added into a 4 mL glass bottle in 1 mL Tetrahydrofuran (THF). The mixture was stirred at room temperature for 30 mins, then brominated fluoroethanol benzoate (**BFEB**) (29.6 mg, 0.12 mmol, 1.2 equiv.), benzoyl chloride **1a** (14.1 mg, 0.1 mmol, 1.0 equiv.), Mn (16.5 mg, 0.3 mmol, 3 equiv.), cobalt(II) phthalocyanine ( $\text{CoPc}$ ) (2.9 mg, 0.005 mmol, 5 mol%) and *N*-benzylidene-tertbutylamineoxide (**PBN**) (7.1 mg, 0.04 mmol, 0.4 equiv.) was added and keep stirring at  $-10\text{ }^\circ\text{C}$  for 1 hours and then analyzed by EPR (Figure S3).

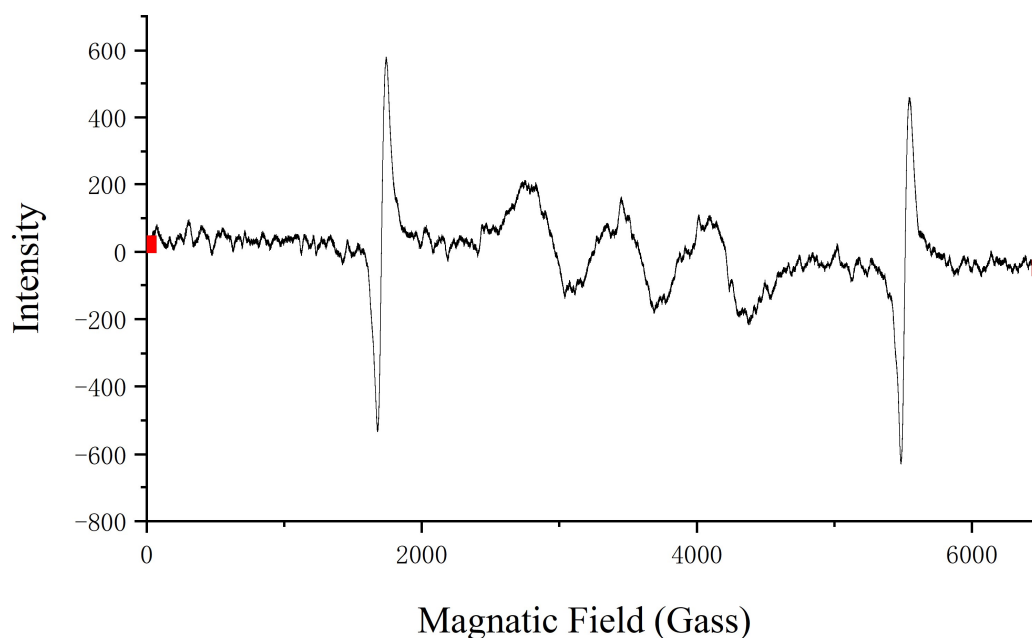

**Figure S3.** The EPR spectrum of **9**.

MEASUREMENT CONDITIONS

**MAGNET FIELD**

Sweep time  Center field  mT Sweep width +/-  x  mT

**AMP**

|                | CH1                                                                     | CH2                                                                           |
|----------------|-------------------------------------------------------------------------|-------------------------------------------------------------------------------|
| Mod. freq.     | <input type="text" value="100.00"/> kHz                                 | <input type="text" value="2nd"/> Mode                                         |
| Mod. width +/- | <input type="text" value="1.0"/> x <input type="text" value="0.1"/> mT  | <input type="text" value="2.000"/> x <input type="text" value="1"/> Amplitude |
| Phase          | <input type="text" value="0"/> deg                                      | <input type="text" value="0"/> deg                                            |
|                | <input type="text" value="10.00"/> x <input type="text" value="100"/> s | <input type="text" value="0.03"/> s                                           |

**MICRO WAVE**

Frequency  MHz Power  mW Phase  Coupling

Accumulation  Date  Mn  ESR data

Total waves  Tempe  UCR2M  Length

**SEQUENTIAL CONTROL**

-  +  (From  To )

Index

CLOSE

PX CONDITIONS

LOOK

PRINT

**Figure S4.** The measurement conditions of EPR.

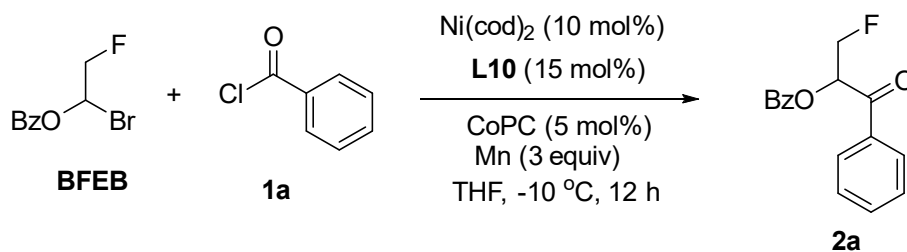

In a glove box,  $\text{Ni(cod)}_2$  (2.8 mg, 0.01 mmol, 10 mol%), and **L10** (12.6 mg, 0.015 mmol, 15 mol%) were added into a 4 mL glass bottle in 1 mL Tetrahydrofuran (THF). The mixture was stirred at room temperature for 30 mins, then brominated fluoroethanol benzoate (**BFEB**) (29.6 mg, 0.12 mmol, 1.2 equiv.), benzoyl chloride **1a** (14.1 mg, 0.1 mmol, 1.0 equiv.), Mn (16.5 mg, 0.3 mmol, 3 equiv.), cobalt(II) phthalocyanine (CoPc) (2.9 mg, 0.005 mmol, 5 mol%) was added and keep stirring at  $-10\text{ }^\circ\text{C}$  for 1 hours and then analyzed by EPR (Figure S5).

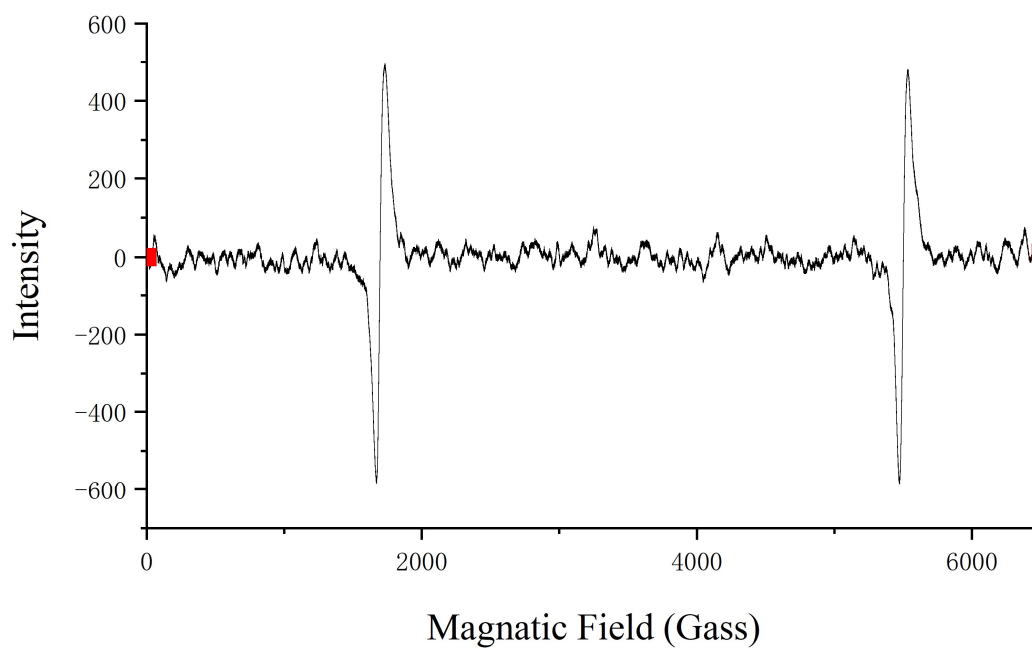

**Figure S5.** The EPR spectrum of **2a**.

*N*-benzylidene-tertbutylamineoxide (**PBN**) (7.1 mg, 0.04 mmol, 0.4 equiv.) was added into a 4 mL glass bottle in 1 mL Tetrahydrofuran (THF) and then analyzed by EPR (Figure S6).

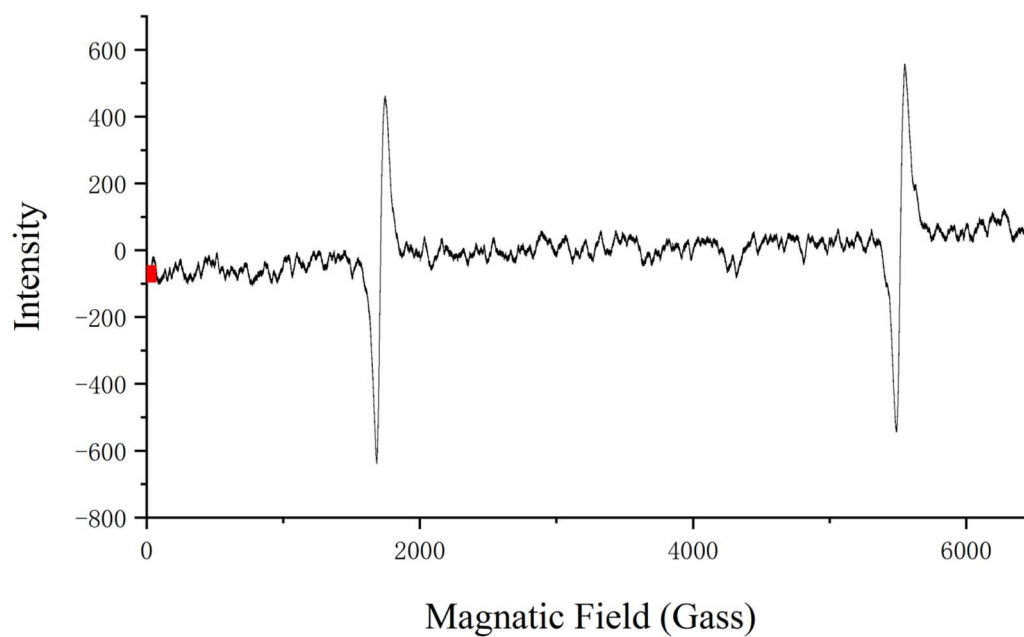

**Figure S6.** The EPR spectrum of PBN in THF

### 8.3 Stoichiometric reaction

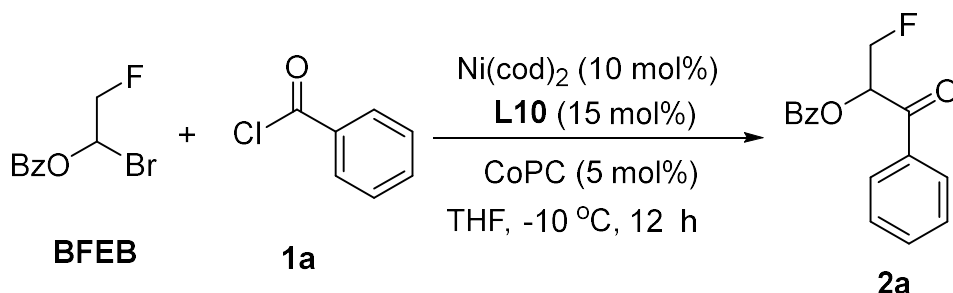

In a glove box,  $\text{Ni}(\text{cod})_2$  (2.8 mg, 0.01 mmol, 10 mol%), and **L1** (12.6 mg, 0.015 mmol, 15 mol%) were added into a 4 mL glass bottle in 1 mL Tetrahydrofuran (THF). The mixture was stirred at room temperature for 30 mins, then brominated fluoroethanol benzoate (**BFEB**) (29.6 mg, 0.12 mmol, 1.2 equiv.), benzoyl chloride **1a** (14.1 mg, 0.1 mmol, 1.0 equiv.), cobalt(II) phthalocyanine ( $\text{CoPc}$ ) (2.9 mg, 0.005 mmol, 5 mol%) was added and keep stirring at  $-10\text{ }^\circ\text{C}$  for 12 hours. Detected **2a** (trace) through TLC.

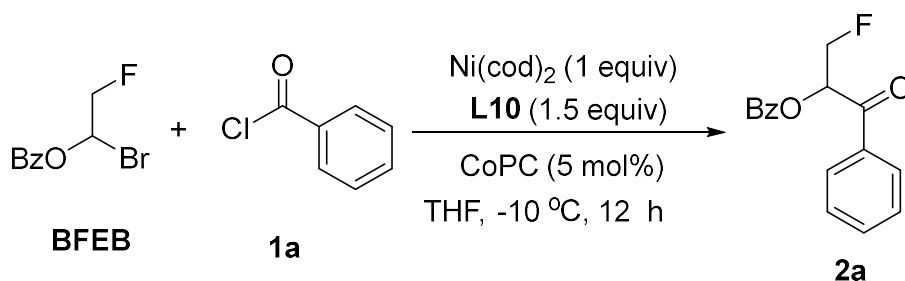

In a glove box,  $\text{Ni}(\text{cod})_2$  (27.5 mg, 0.1 mmol, 1.0 equiv.), and **L10** (125.8 mg, 0.15 mmol, 1.5 equiv.) were added into a 4 mL glass bottle in 1 mL Tetrahydrofuran (THF). The mixture was stirred at room temperature for 30 mins, then brominated fluoroethanol benzoate (**BFEB**) (29.6 mg, 0.12 mmol, 1.2 equiv.), benzoyl chloride **1a** (14.1 mg, 0.1 mmol, 1.0 equiv.), cobalt(II) phthalocyanine ( $\text{CoPc}$ ) (2.9 mg, 0.005 mmol, 5 mol%) was added and keep stirring at  $-10\text{ }^\circ\text{C}$  for 12 hours. After evaporation under reduced pressure to remove the solvent, the mixture was passed through a short column of silica gel to remove the metal complex. The residue was purified by flash chromatography on silica gel (PE : EA = 50: 1) to afford the desired product **2a** (21.8 mg, 80% yield, 93% ee).

## 8.4 Ligand effect and side-products examination

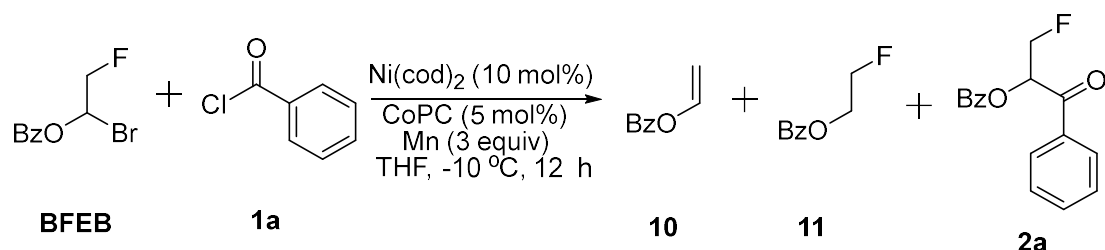

In a glove box, Ni(cod)<sub>2</sub> (27.5 mg, 0.1 mmol, 10 mol%), brominated fluoroethanol benzoate (**BFEB**) (0.30 g, 1.2 mmol, 1.2 equiv.), benzoyl chloride **1a** (0.14 g, 1 mmol, 1.0 equiv.), Mn (0.16 g, 3 mmol, 3 equiv.), cobalt(II) phthalocyanine (CoPc) (28.6 mg, 0.05 mmol, 5 mol%) were added into 50 mL Schlenk flask equipped with a stirring bar in 10 mL Tetrahydrofuran (THF). The mixture was stirred at -10 °C for 12 hours. After evaporation under reduced pressure to remove the solvent, the mixture was passed through a short column of silica gel to remove the metal complex. The residue was purified by flash chromatography on silica gel (PE : EA = 50: 1) to afford the product **10** (78.5 mg, 53% yield), product **11** (30.3 mg, 18% yield), product **2a** (trace).

### vinyl benzoate(**10**)

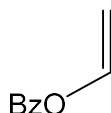

78.5 mg, 53% yield, PE : EA = 100: 1. Yellow oil; <sup>1</sup>H NMR (500 MHz, Chloroform-*d*) δ 8.03 (d, *J* = 7.6 Hz, 2H), 7.56 – 7.47 (m, 1H), 7.44 (dd, *J* = 14.0, 6.3 Hz, 1H), 7.38 (t, *J* = 7.7 Hz, 2H), 5.05 – 4.58 (m, 2H). <sup>13</sup>C NMR (126 MHz, Chloroform-*d*) δ 163.7, 141.5, 133.6, 130.0, 129.0, 128.6, 98.3; HRMS (ESI) *m/z* calcd. for C<sub>9</sub>H<sub>9</sub>O<sub>2</sub> ([M+H]<sup>+</sup>): 149.0603, found 149.0598.

### 2-fluoroethyl benzoate (**11**)

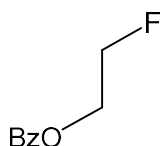

30.3 mg, 18% yield, PE : EA = 50: 1. Yellow oil; <sup>1</sup>H NMR (500 MHz, Chloroform-*d*)



$\delta$  8.12 – 8.04 (m, 2H), 7.61 – 7.54 (m, 1H), 7.45 (t,  $J = 7.8$  Hz, 2H), 4.85 – 4.48 (m, 2H), 4.71 – 4.57 (m, 2H).  $^{19}\text{F}$  NMR (470 MHz, Chloroform- $d$ )  $\delta$  -224.31 – -224.68 (m).  $^{13}\text{C}$  NMR (126 MHz, Chloroform- $d$ )  $\delta$  165.4, 132.2, 128.7, 128.7, 127.4, 80.4 (d,  $J = 170.8$  Hz), 62.8 (d,  $J = 20.2$  Hz); HRMS (ESI)  $m/z$  calcd. for  $\text{C}_9\text{H}_9\text{O}_2\text{NaF}$  ( $[\text{M}+\text{Na}]^+$ ): 191.0484, found 191.0487.

## 8.5 Probing the kinetic resolution of starting material

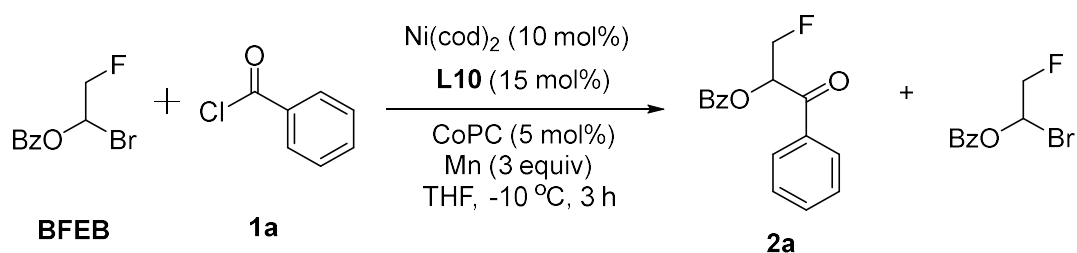

In a glove box,  $\text{Ni}(\text{cod})_2$  (2.8 mg, 0.01 mmol, 10 mol%), and **L10** (12.6 mg, 0.015 mmol, 15 mol%) were added into a 4 mL glass bottle in 1 mL Tetrahydrofuran (THF). The mixture was stirred at room temperature for 30 mins, then brominated fluoroethanol benzoate (**BFEB**) (29.6 mg, 0.12 mmol, 1.2 equiv.), benzoyl chloride **1a** (14.1 mg, 0.1 mmol, 1.0 equiv.), Mn (16.5 mg, 0.3 mmol, 3 equiv.), cobalt(II) phthalocyanine (CoPc) (2.9 mg, 0.005 mmol, 5 mol%) and keep stirring at  $-10^\circ\text{C}$  for 3 hours. After evaporation under reduced pressure to remove the solvent, the mixture was passed through a short column of silica gel to remove the metal complex. The residue was purified by flash chromatography on silica gel (PE : EA = 50: 1) to afford the desired product **2a** (14.2 mg, 52% yield, 92% ee) and the recovered **BFEB** (14.6 mg, 59% yield, 1.5% ee).

## 8.6 Comparing experiments with various acyl donors

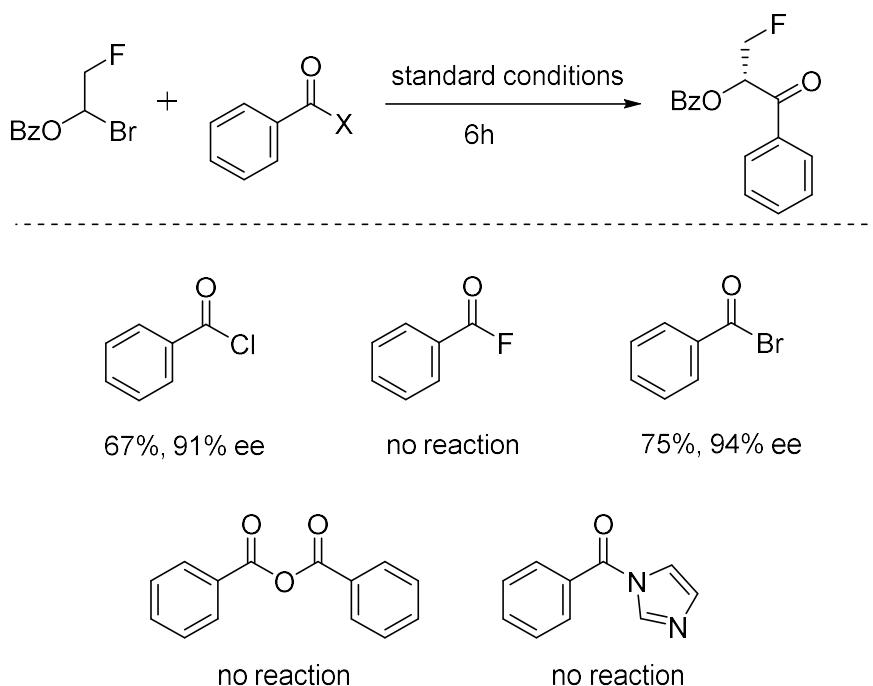

In a glove box, Ni(cod)<sub>2</sub> (2.8 mg, 0.01 mmol, 10 mol%), and **L10** (12.6 mg, 0.015 mmol, 15 mol%) were added into a 4 mL glass bottle in 1 mL Tetrahydrofuran (THF). The mixture was stirred at room temperature for 30 mins, then brominated fluoroethanol benzoate (**BFEB**) (29.6 mg, 0.12 mmol, 1.2 equiv.), acyl donors (0.1 mmol, 1.0 equiv.), Mn (16.5 mg, 0.3 mmol, 3 equiv.), cobalt(II) phthalocyanine (CoPc) (2.9 mg, 0.005 mmol, 5 mol%) and keep stirring at -10 °C for 6 hours. After evaporation under reduced pressure to remove the solvent, the mixture was passed through a short column of silica gel to remove the metal complex. The residue was purified by flash chromatography on silica gel (PE : EA = 50: 1) to afford the desired product **2a**. Acyl donors = benzoyl chloride, afford the desired product **2a** (18.2 mg, 67% yield, 91% ee). Acyl donors = benzoyl bromide, afford the desired product **2a** (20.4 mg, 75% yield, 94% ee).

## 8.7 Nonlinear Effect Study

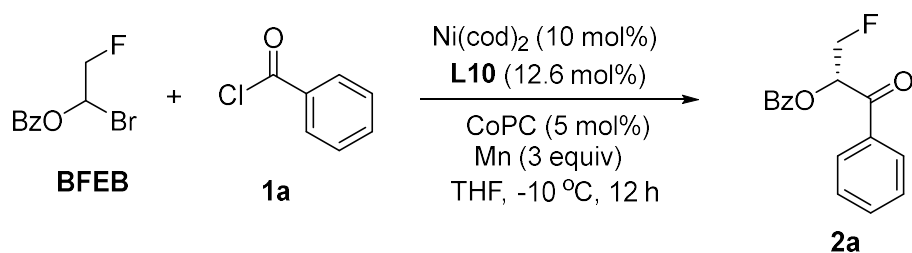

In a glove box, Ni(cod)<sub>2</sub> (2.8 mg, 0.01 mmol, 10 mol%), (4*S*,4'*S*,5*R*,5'*R*)-**L10** and (4*R*,4'*R*,5*S*,5'*S*)-**L10** (Table S1) were added into a 4 mL glass bottle in 1 mL Tetrahydrofuran (THF). The mixture was stirred at room temperature for 30 mins, then brominated fluoroethanol benzoate (**BFEB**) (29.6 mg, 0.12 mmol, 1.2 equiv.), benzoyl chloride **1a** (14.1 mg, 0.1 mmol, 1.0 equiv.), Mn (16.5 mg, 0.3 mmol, 3 equiv.), cobalt(II) phthalocyanine (CoPc) (2.9 mg, 0.005 mmol, 5 mol%) and keep stirring at -10 °C for 12 hours. After evaporation under reduced pressure to remove the solvent, the mixture was passed through a short column of silica gel to remove the metal complex. The residue was purified by flash chromatography on silica gel (PE : EA = 50: 1) to afford the desired product **2a**. The enantiomeric excess was determined by Chiral HPLC (Table S1, Figure S7).

| entry | ee of <b>L10</b> (%) | (4 <i>S</i> ,4' <i>S</i> ,5 <i>R</i> ,5' <i>R</i> )- <b>L10</b><br>(mol%) | (4 <i>R</i> ,4' <i>R</i> ,5 <i>S</i> ,5' <i>S</i> )- <b>L10</b><br>(mol%) | ee of <b>2a</b> (%) |
|-------|----------------------|---------------------------------------------------------------------------|---------------------------------------------------------------------------|---------------------|
| 1     | 20                   | 7.6                                                                       | 5                                                                         | 11                  |
| 2     | 40                   | 8.8                                                                       | 3.8                                                                       | 32                  |
| 3     | 60                   | 10.1                                                                      | 2.5                                                                       | 54                  |
| 4     | 80                   | 11.3                                                                      | 1.3                                                                       | 79                  |
| 5     | 99                   | 12.6                                                                      | 0                                                                         | 93                  |

**Table S1.** The amount of chiral ligand **L10** and ee of **2a**

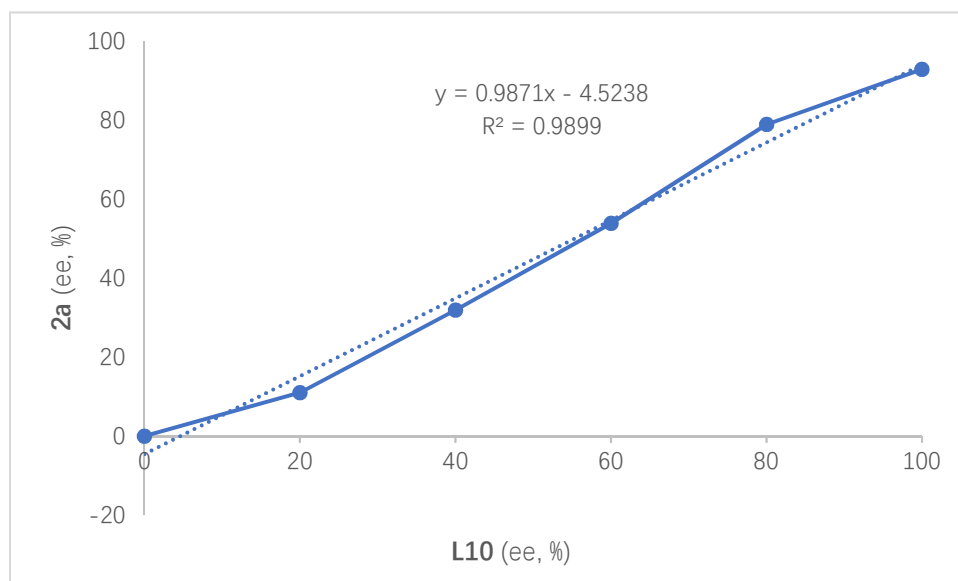

**Figure S7.** The ee of **2a** correlates linearly with the ee of the chiral ligand **L10**.

## 9 References

- [1] X.-Q. Mou, F.-M. Rong, H. Zhang, G. Chen, G. He, *Org. Lett.*, 2019, **21**, 4657–4661.
- [2] J. Wu, H. Wu, X. Liu, Y. Zhang, G. Huang, C. Zhang, *Org. Lett.*, 2022, **24**, 4322–4327.
- [3] B. Roh, A. O. Farah, B. Kim, T. Feoktistova, F. Moeller, K. D. Kim, P. H-Y. Cheong, H. G. Lee, *J. Am. Chem. Soc.*, 2023, **145**, 13, 7075–7083.
- [4] M. Fujita, T. Hiyama, *J. Org. Chem.*, 1988, **53**, 918-920.
- [5] J. Chen, D. Liu, N. Butt, C. Li, D. Fan, Y. Liu, W. Zhang, *Angew. Chem. Int. Ed.*, 2013, **52**, 11632–11636.
- [6] H. Ji, D. Lin, L. Tai, X. Li, Y. Shi, Q. Han, L. Chen, *J. Am. Chem. Soc.*, 2022, **144**, **50**, 23019–23029.
- [7] H-X. Zhang, J. Nie, H. Cai, J-A. Ma, *Org. Lett.*, 2014, **16**, 2542–2545.

## 10 NMR spectra of the related compound

$^1\text{H}$ ,  $^{13}\text{C}$ , and  $^{19}\text{F}$  NMR spectra of **BFEB**

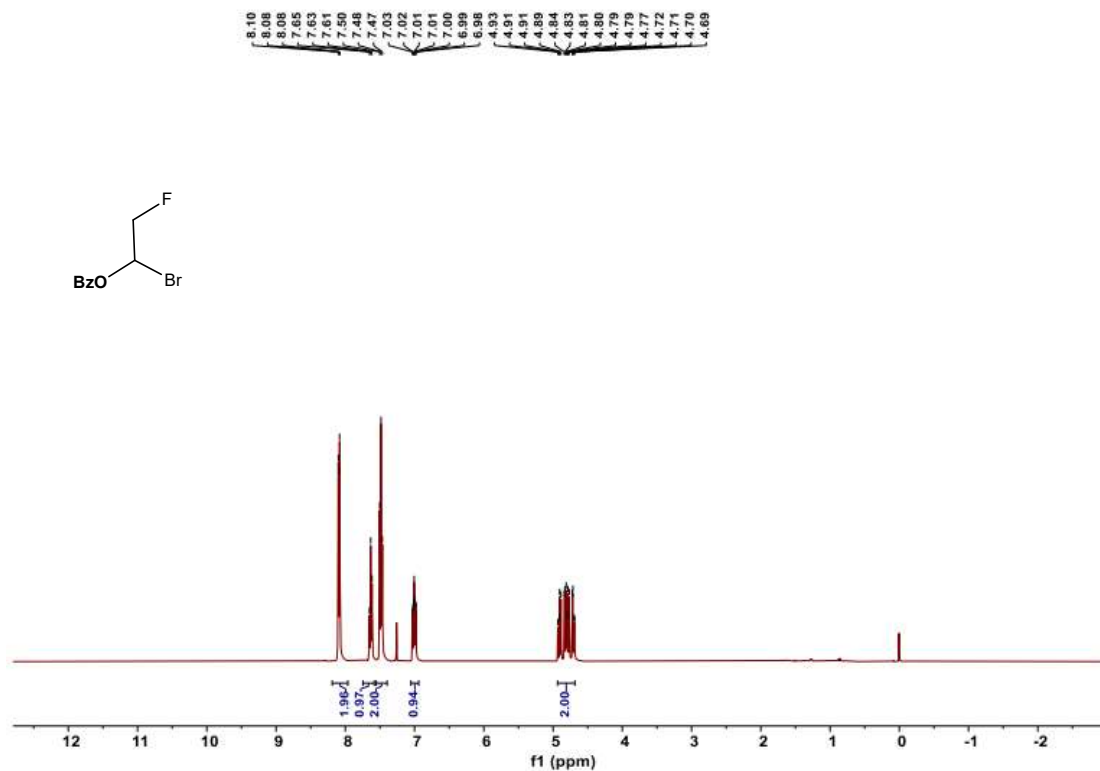

$^1\text{H}$  NMR (400 MHz, Chloroform-*d*) of **BFEB**

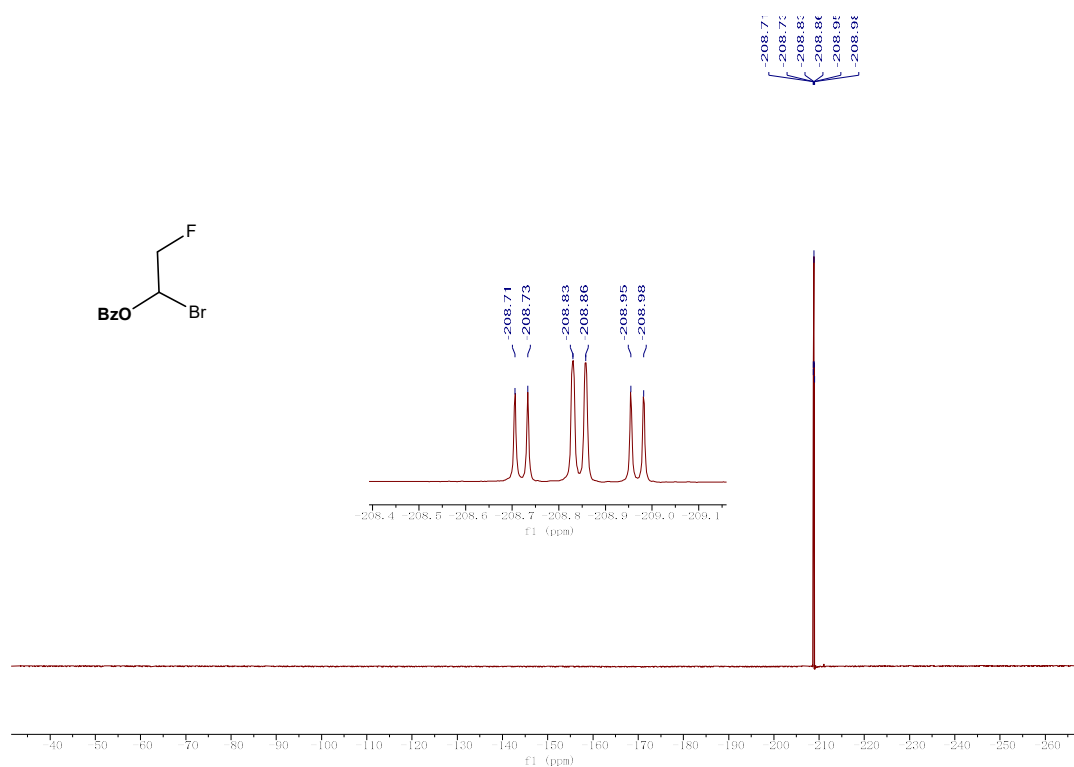

$^{19}\text{F}$  NMR (376 MHz, Chloroform-*d*) of **BFEB**

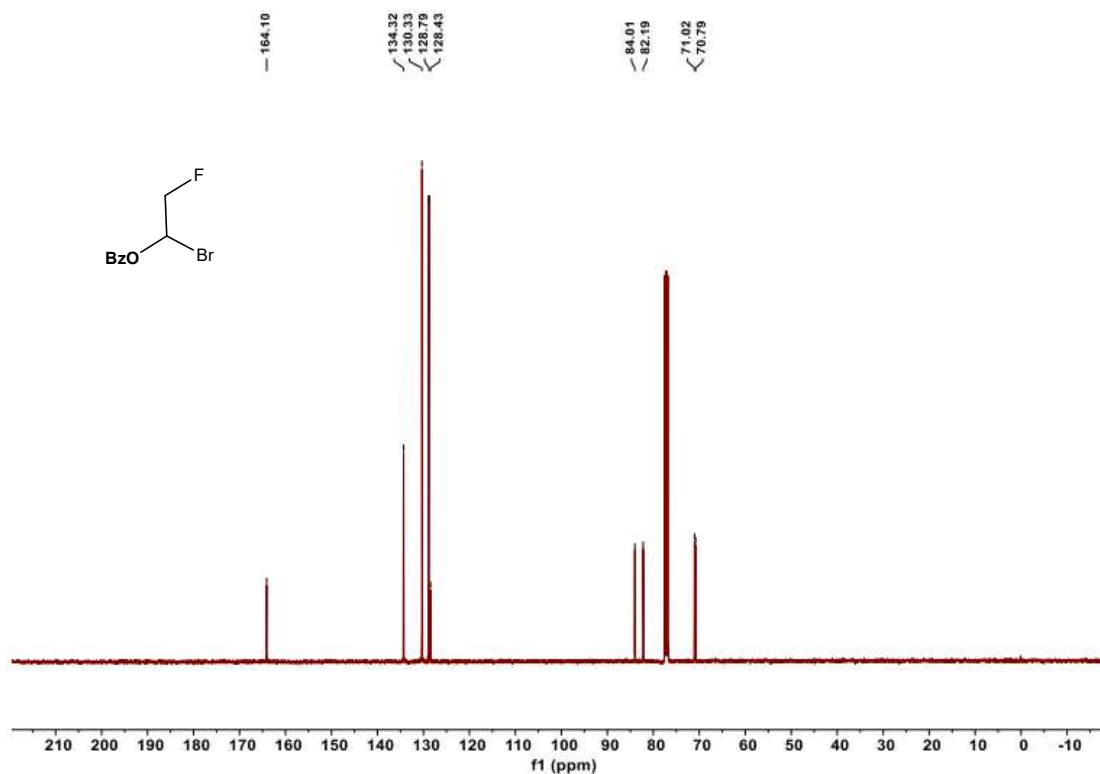

$^{13}\text{C}$  NMR (101 MHz, Chloroform-*d*) of BFEb  
 $^1\text{H}$ ,  $^{13}\text{C}$ , and  $^{19}\text{F}$  NMR spectra of **2a**

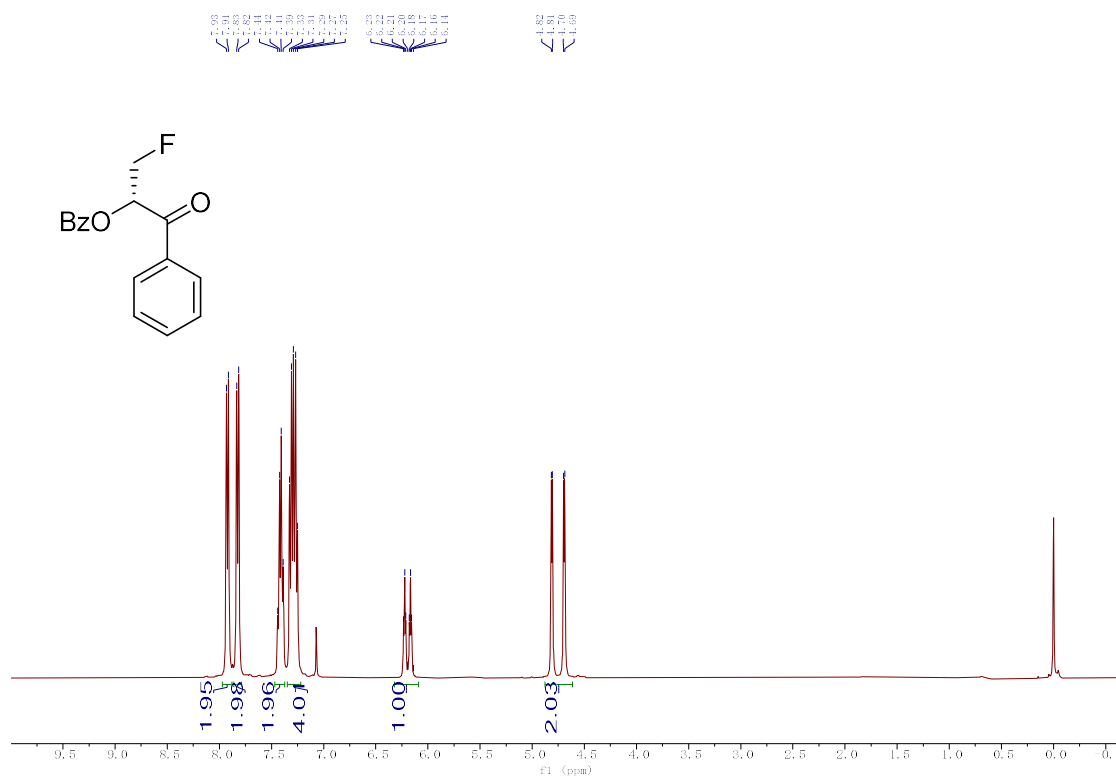

$^1\text{H}$  NMR (500 MHz, Chloroform-*d*) of **2a**

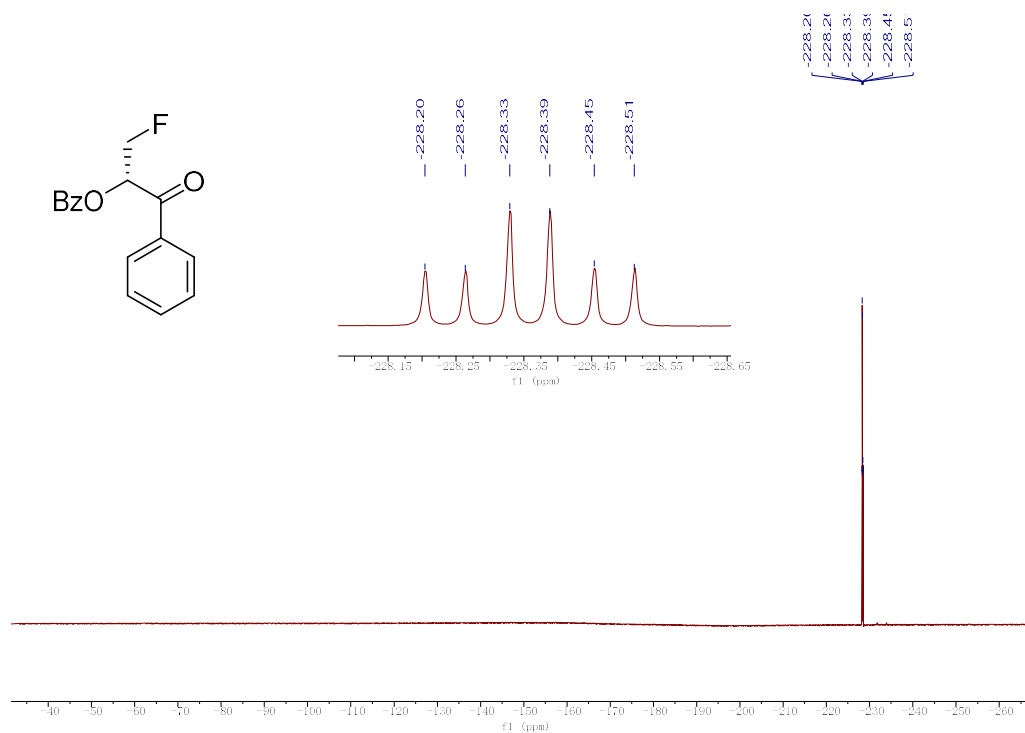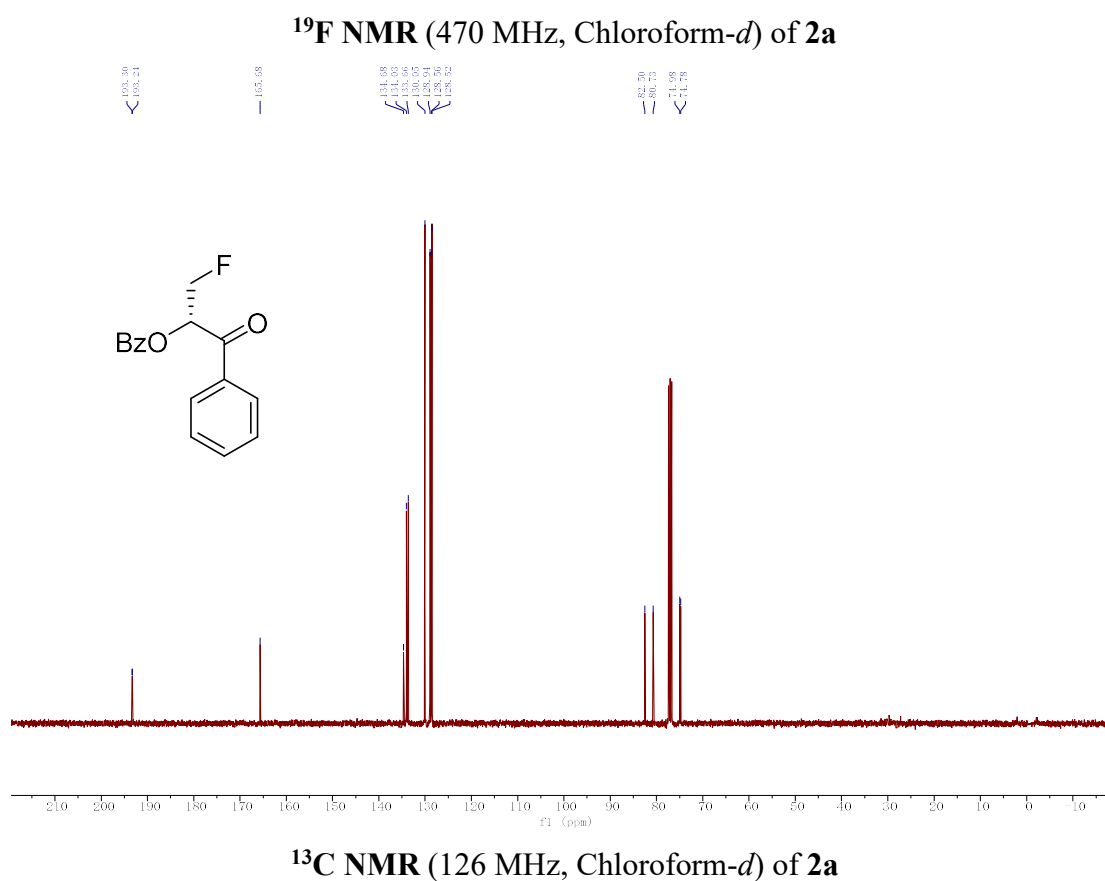



$^1\text{H}$ ,  $^{13}\text{C}$ , and  $^{19}\text{F}$  NMR spectra of **2b**

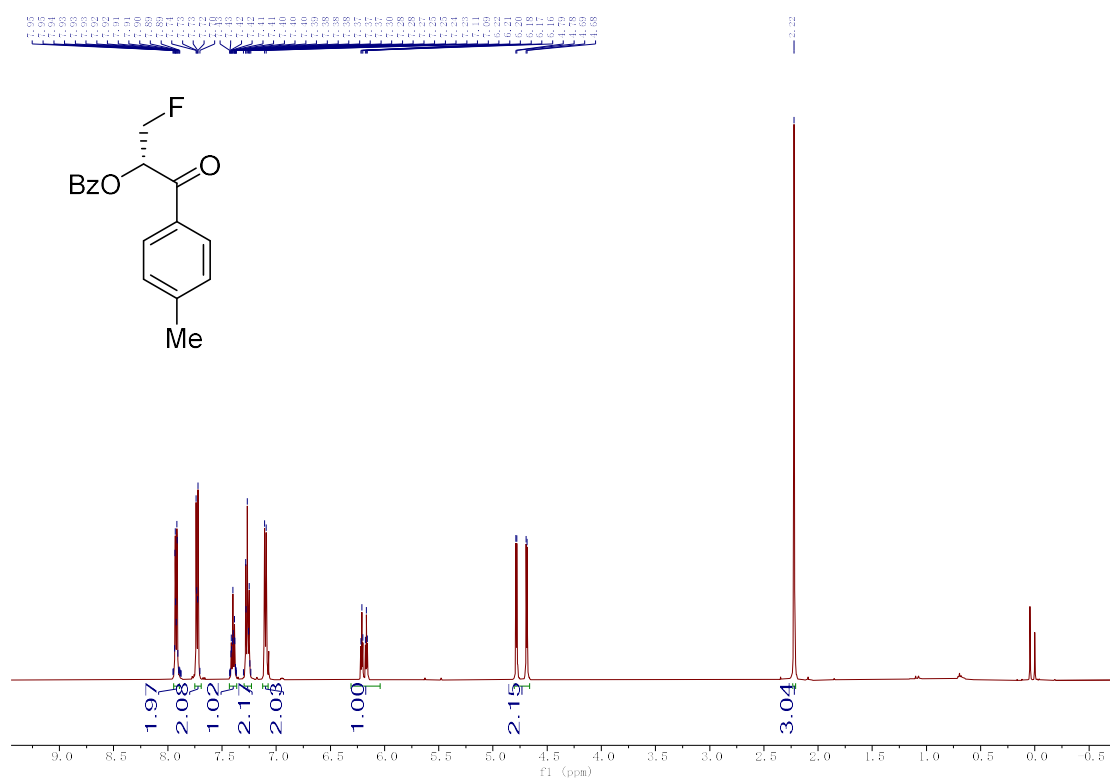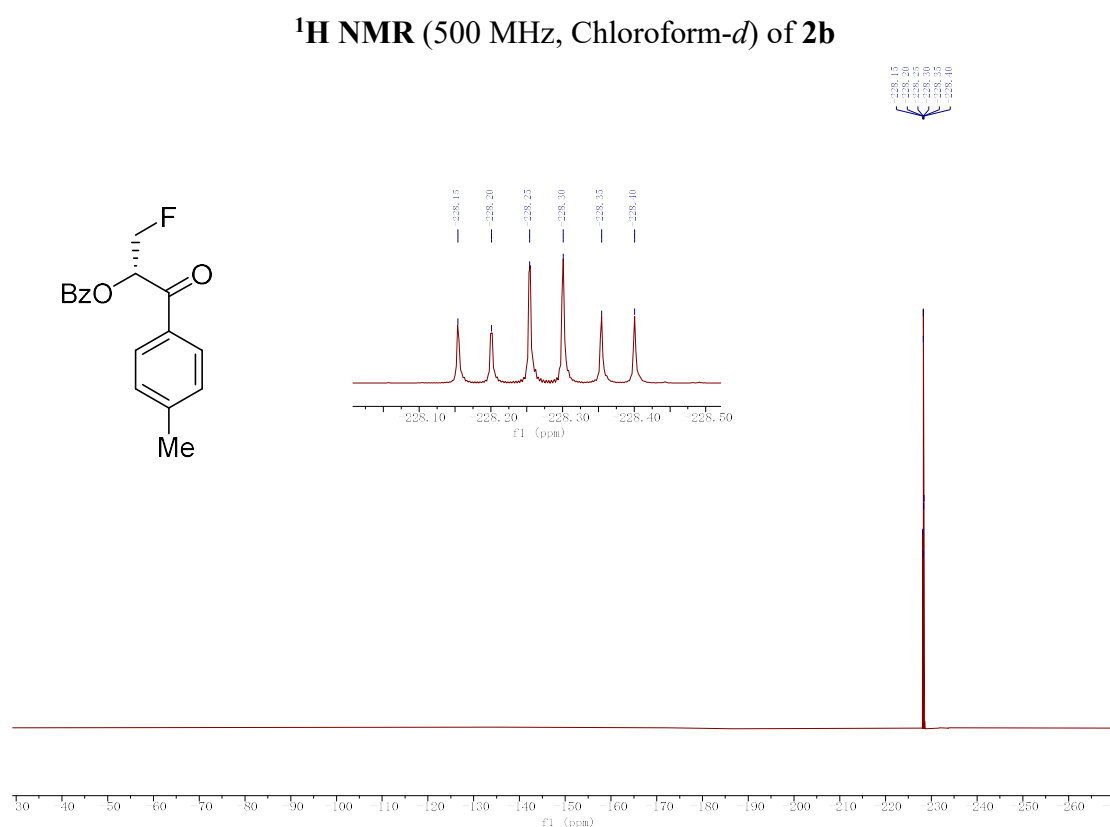

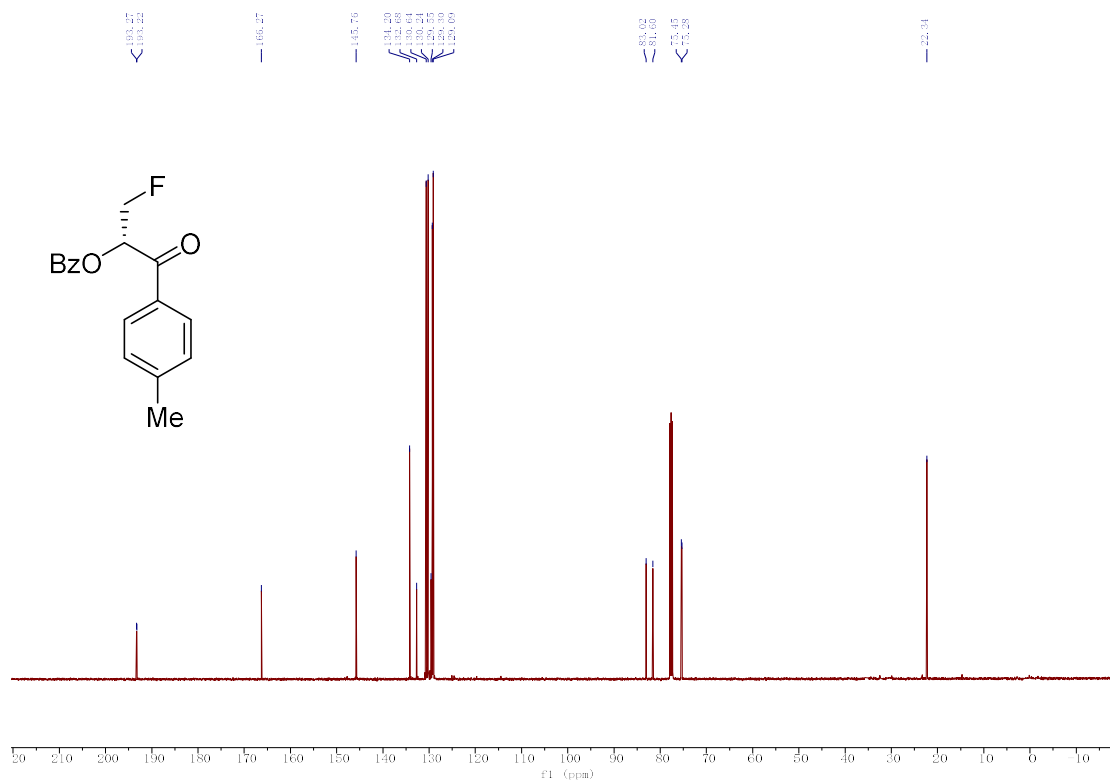

**<sup>13</sup>C NMR (126 MHz, Chloroform-*d*) of **2b****  
**<sup>1</sup>H, <sup>13</sup>C, and <sup>19</sup>F NMR spectra of **2c****

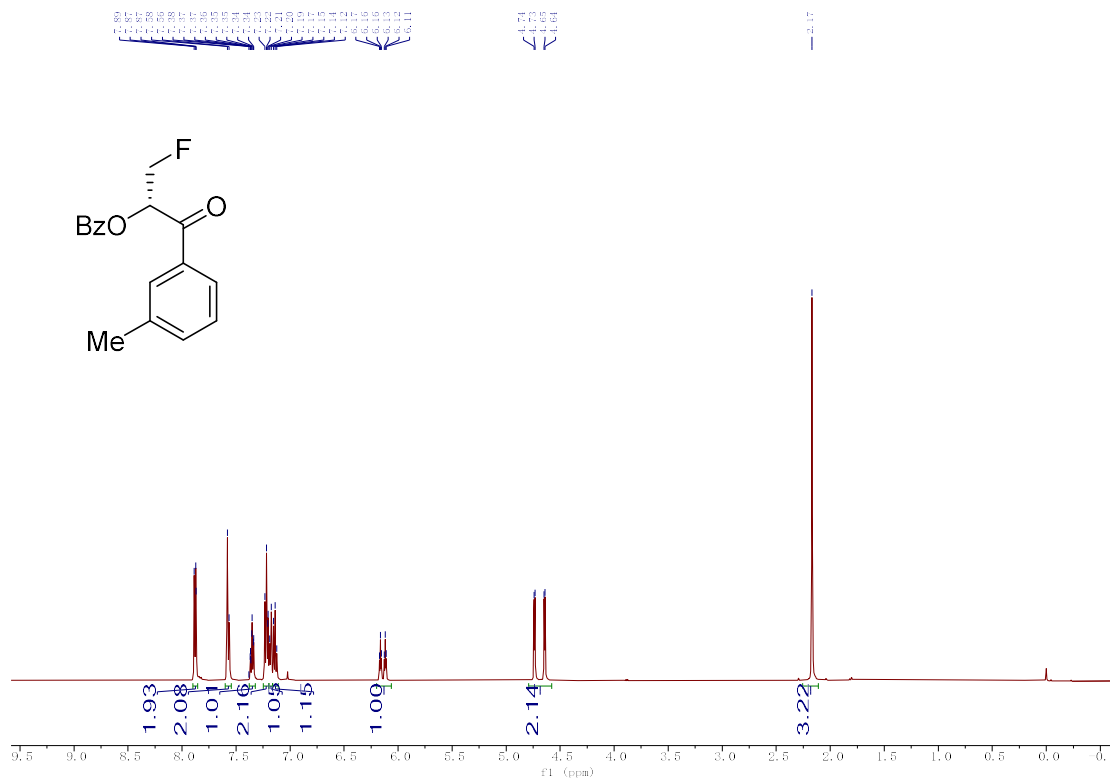

**<sup>1</sup>H NMR (500 MHz, Chloroform-*d*) of **2c****

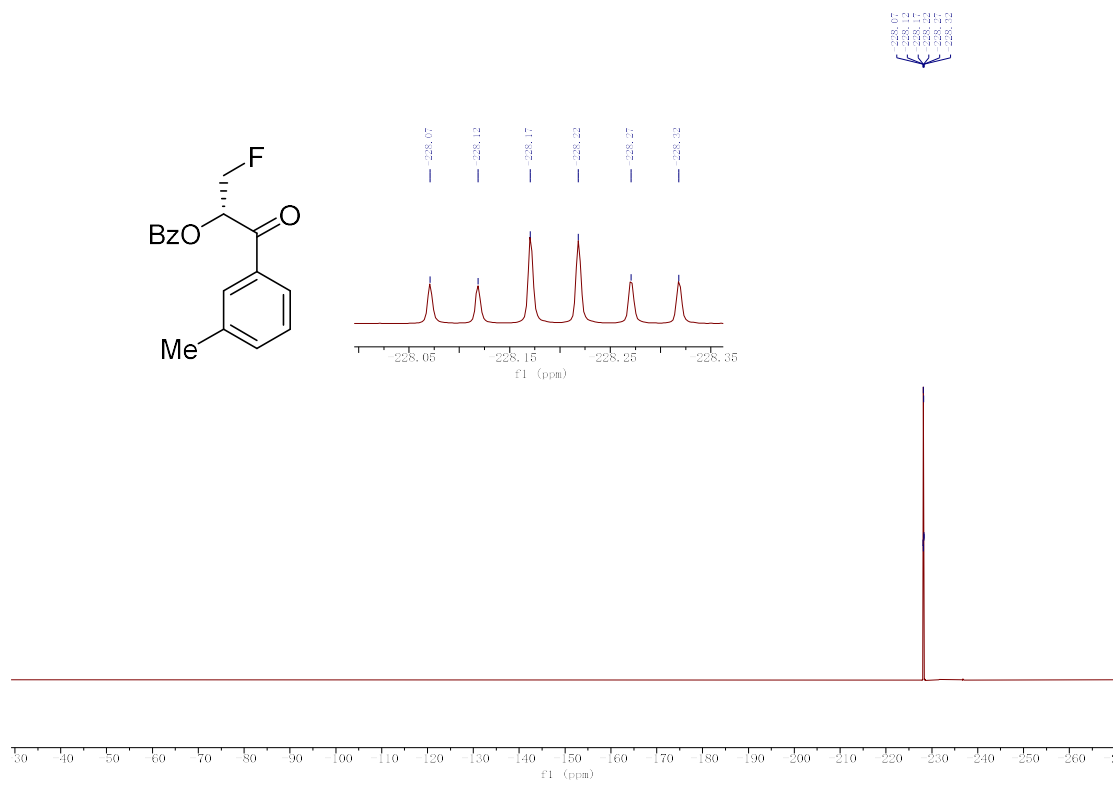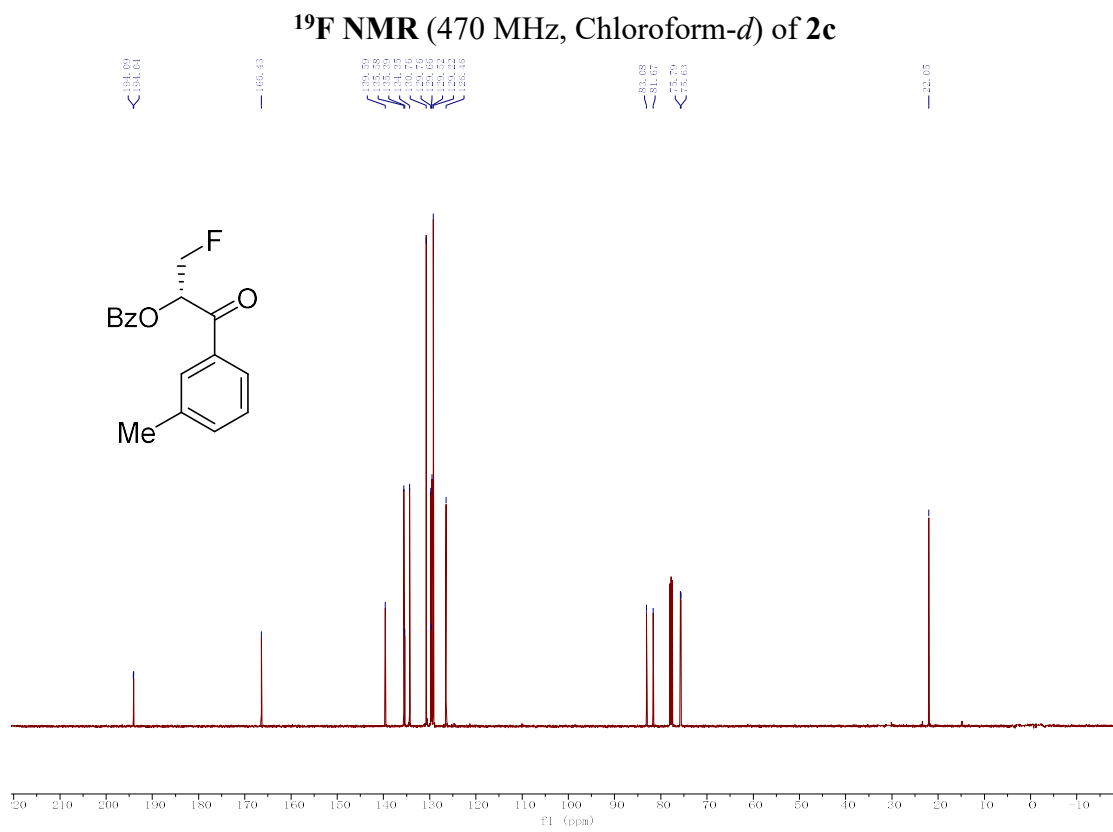

# $^1\text{H}$ , $^{13}\text{C}$ , and $^{19}\text{F}$ NMR spectra of **2d**

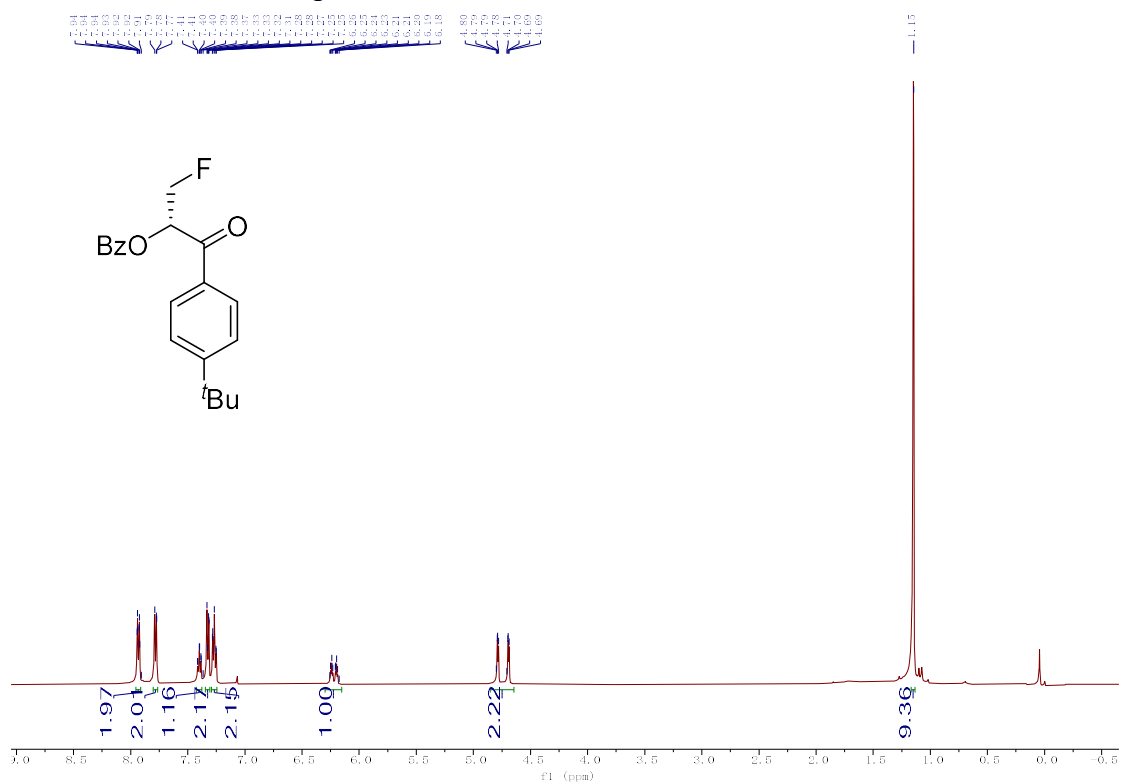

$^1\text{H}$  NMR (500 MHz, Chloroform-*d*) of **2d**

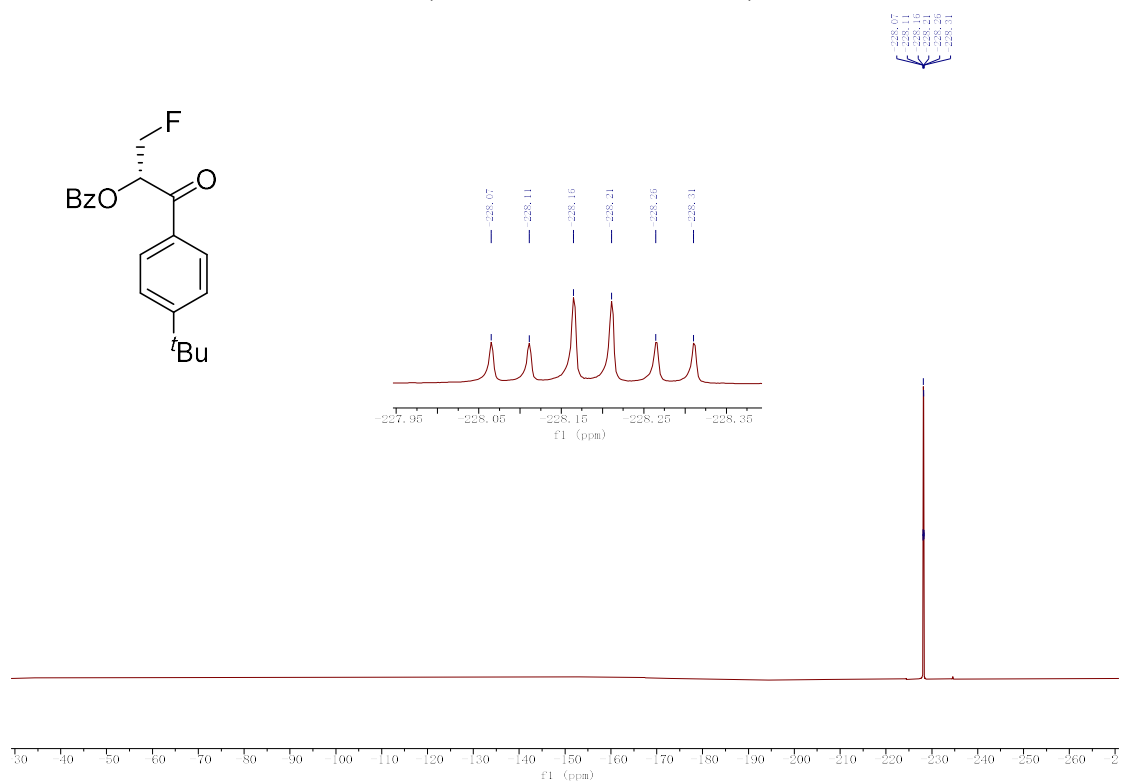

$^{19}\text{F}$  NMR (470 MHz, Chloroform-*d*) of **2d**

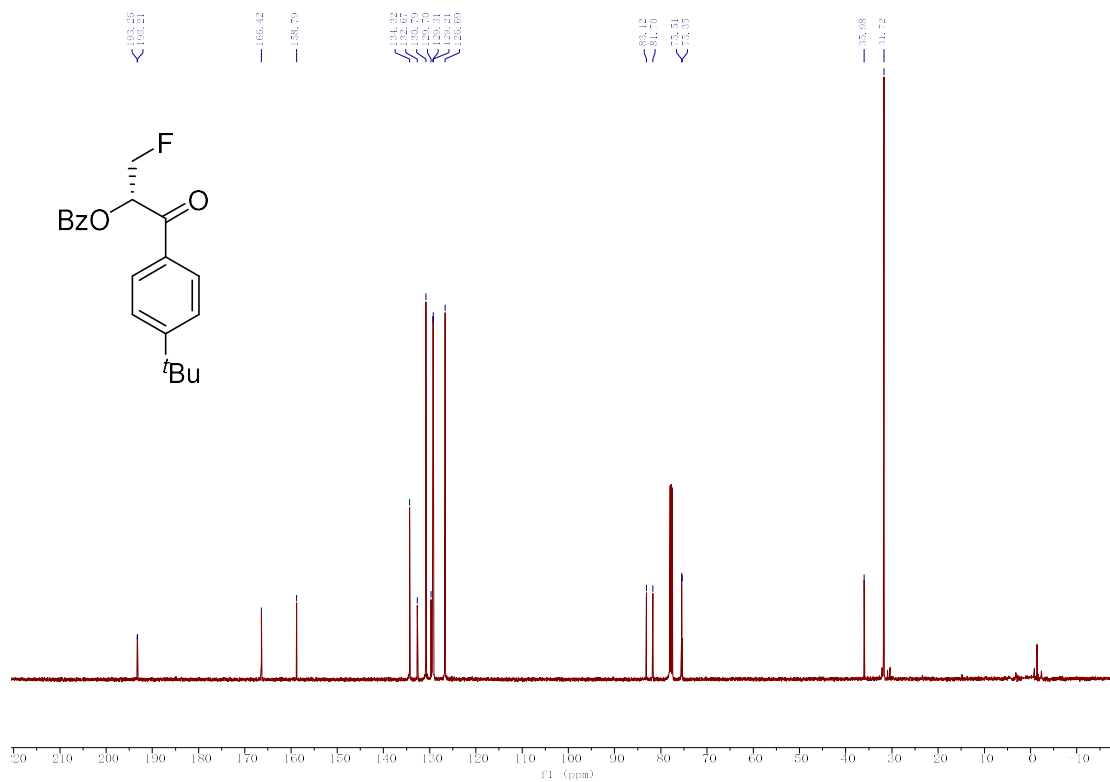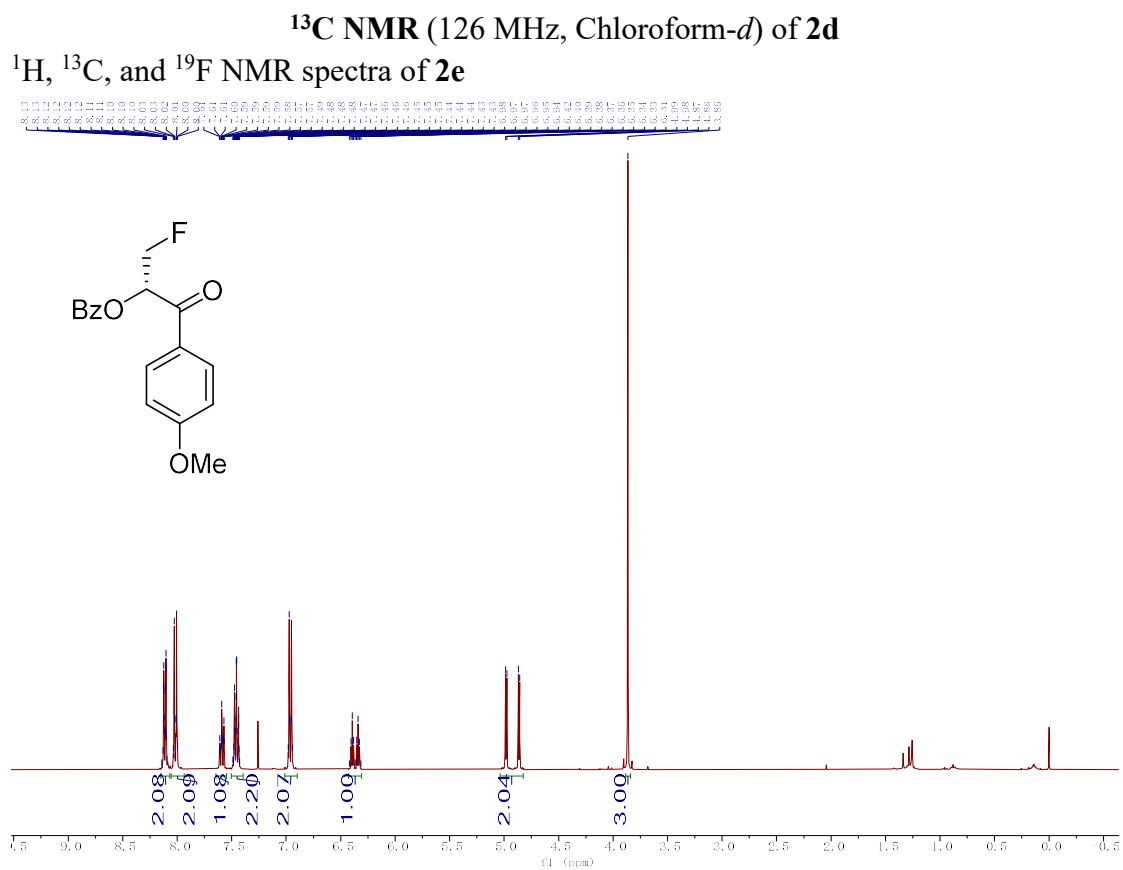

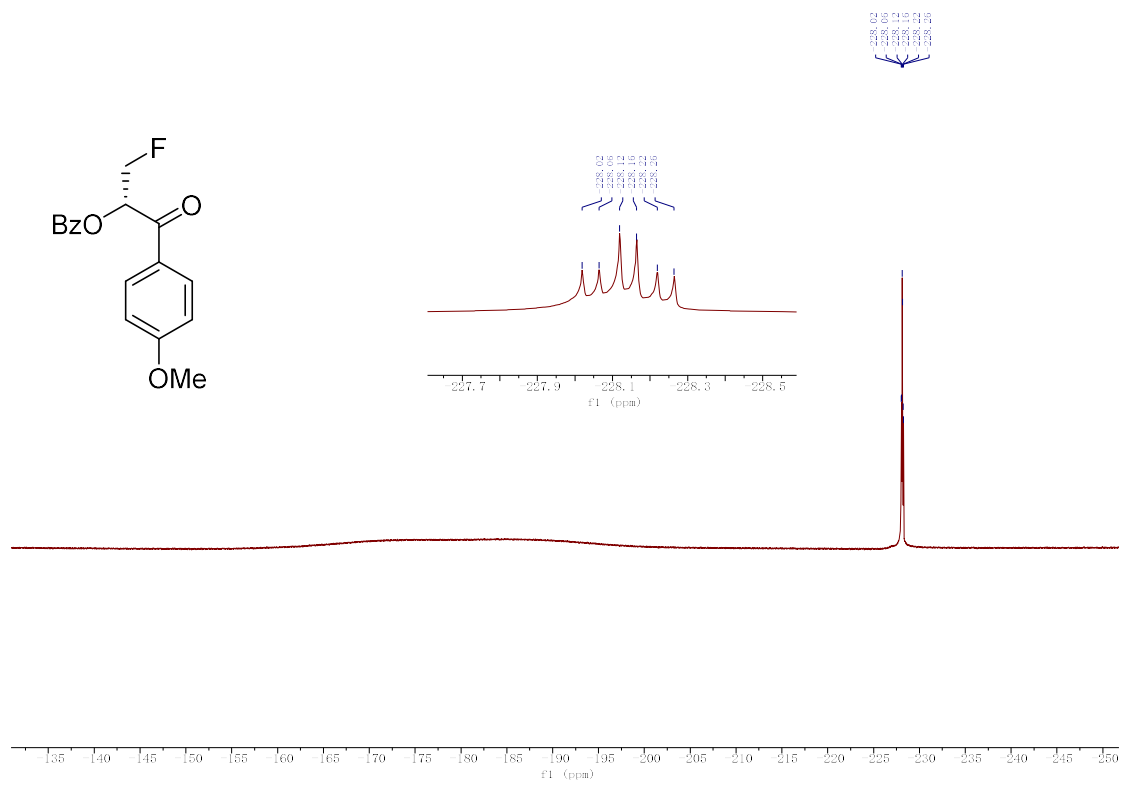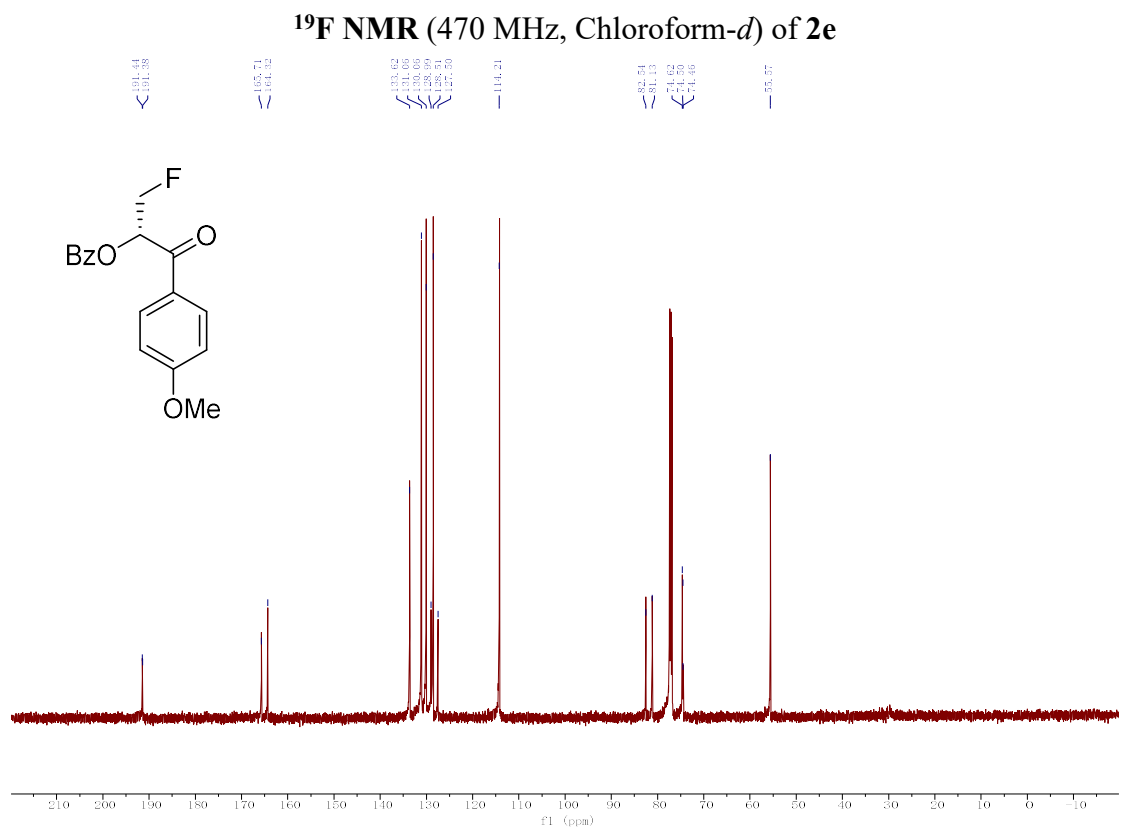

# $^1\text{H}$ , $^{13}\text{C}$ , and $^{19}\text{F}$ NMR spectra of **2f**

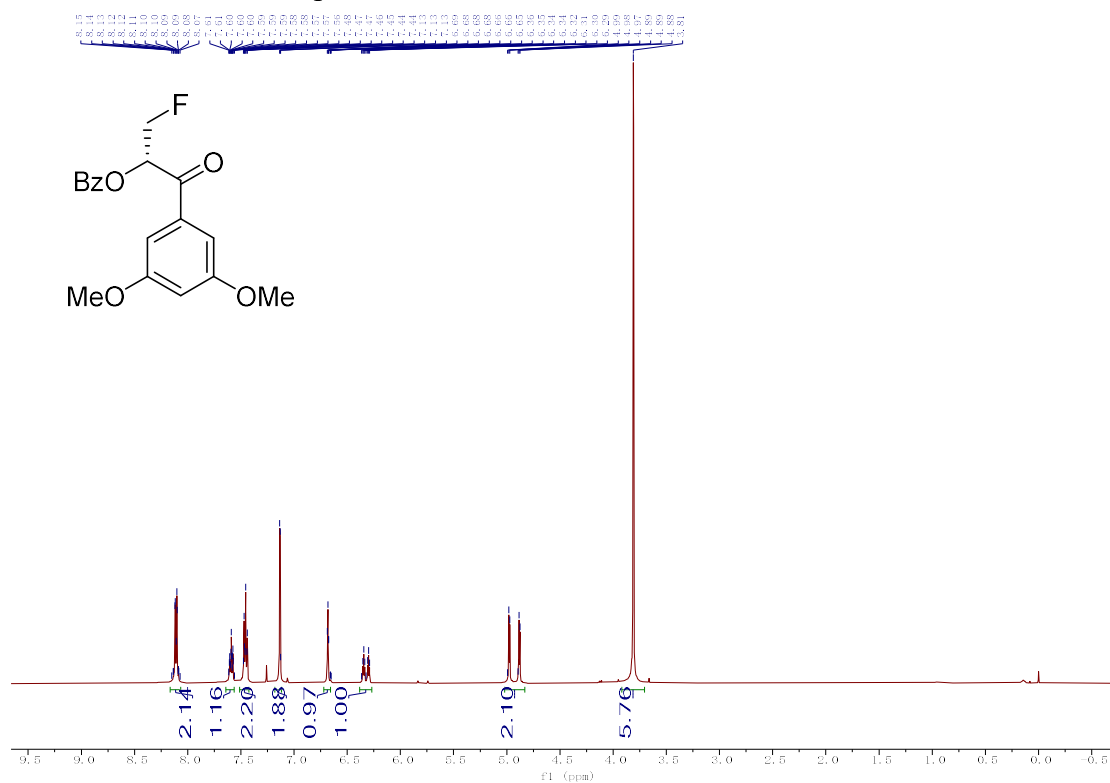

$^1\text{H}$  NMR (500 MHz, Chloroform-*d*) of **2f**

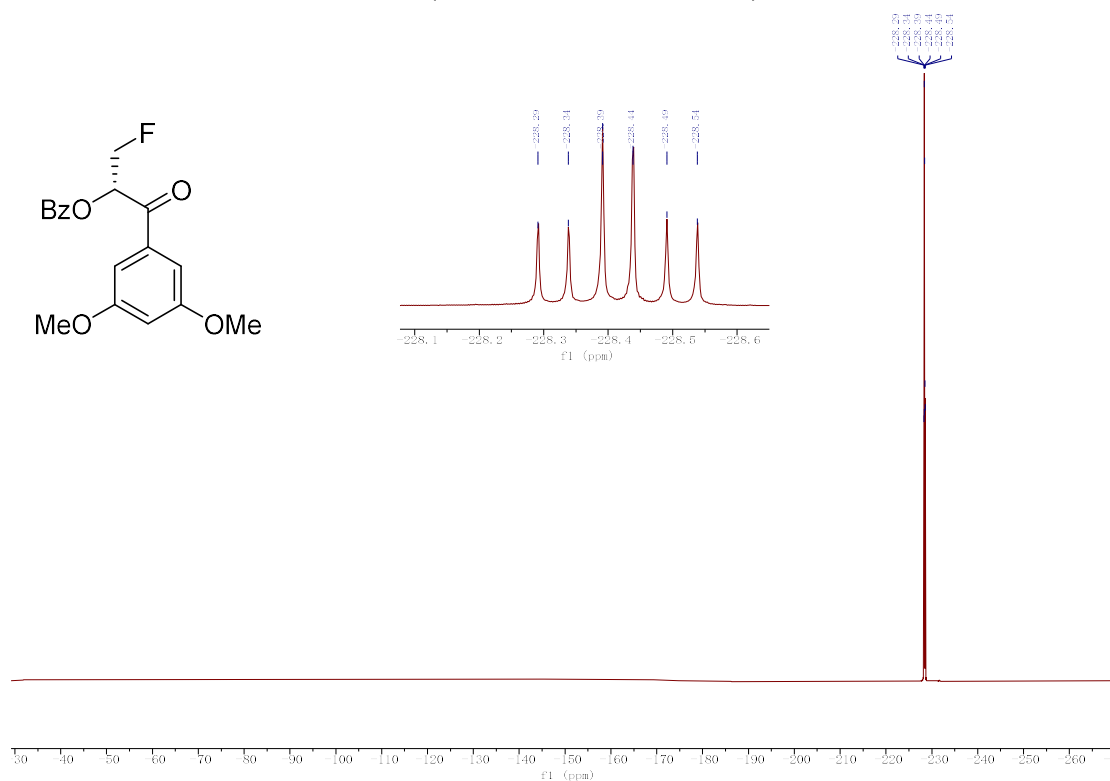

$^{19}\text{F}$  NMR (470 MHz, Chloroform-*d*) of **2f**

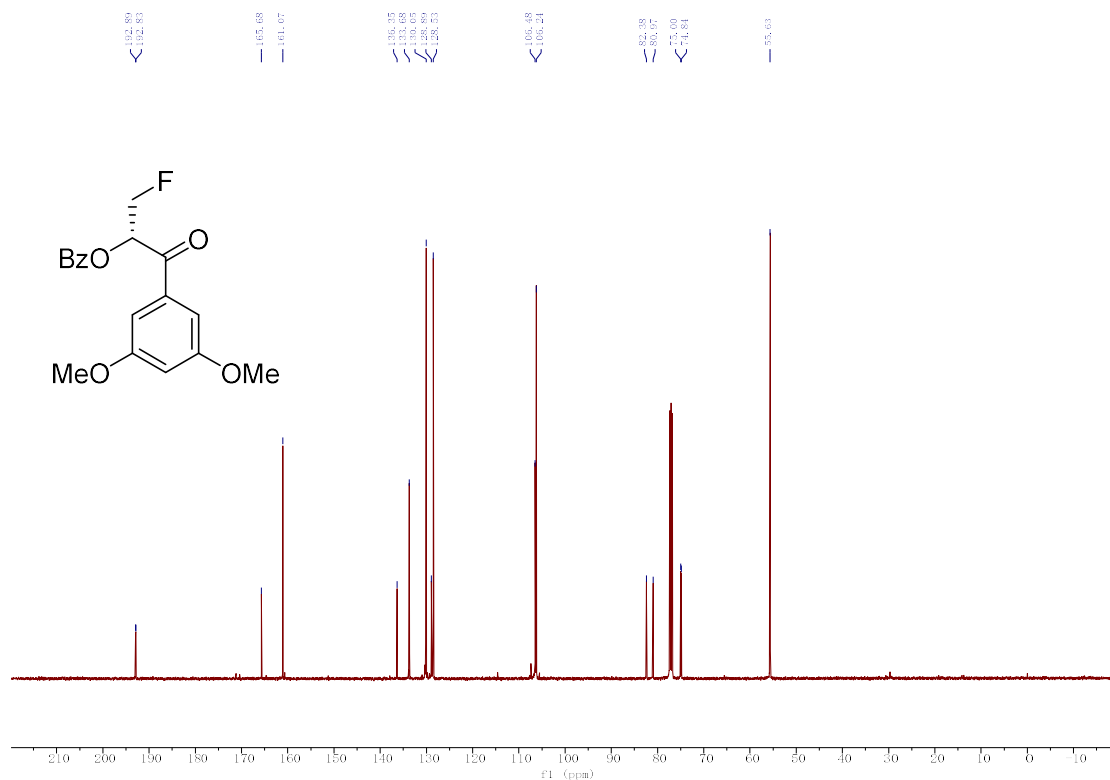

$^{13}\text{C}$  NMR (126 MHz, Chloroform-*d*) of **2f**  
 $^1\text{H}$ ,  $^{13}\text{C}$ , and  $^{19}\text{F}$  NMR spectra of **2g**

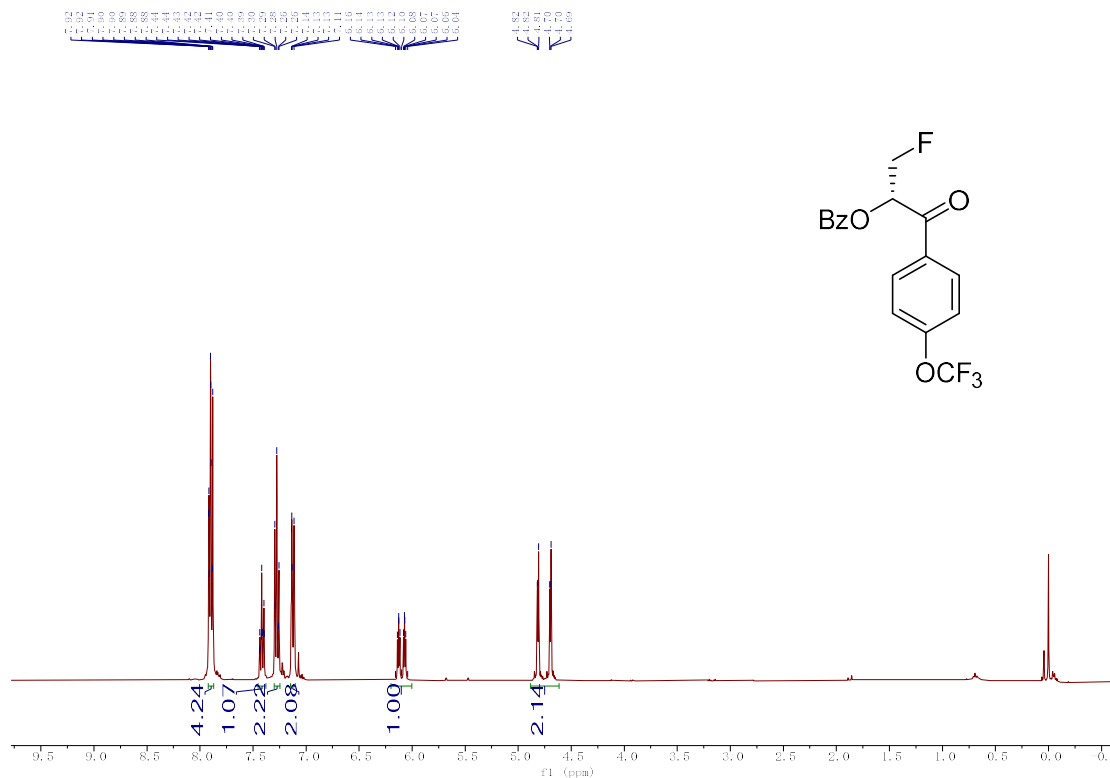

$^1\text{H}$  NMR (500 MHz, Chloroform-*d*) of **2g**



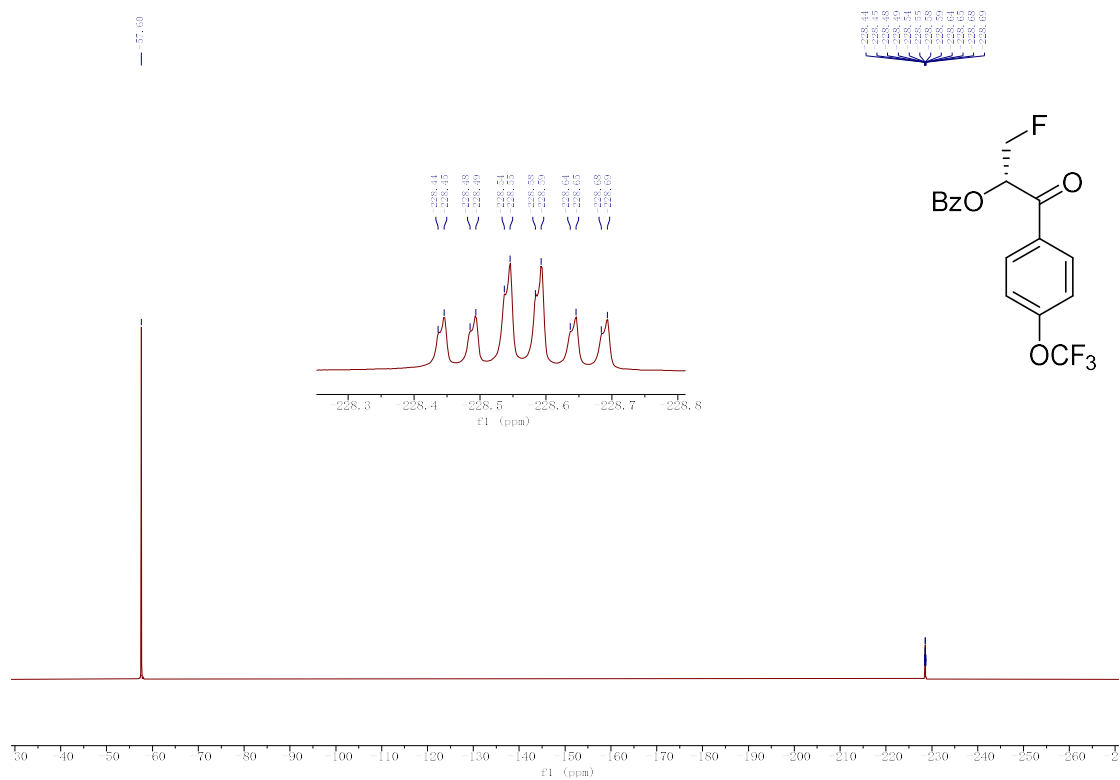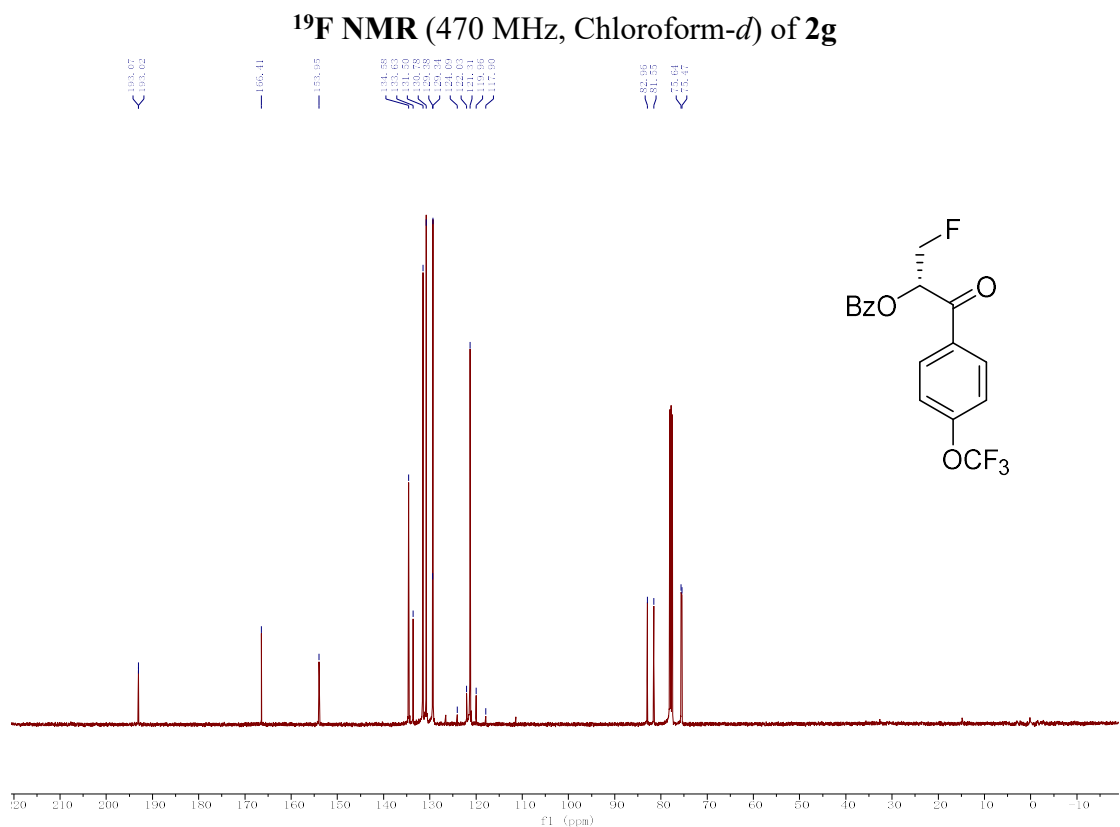

# $^1\text{H}$ , $^{13}\text{C}$ , and $^{19}\text{F}$ NMR spectra of **2h**

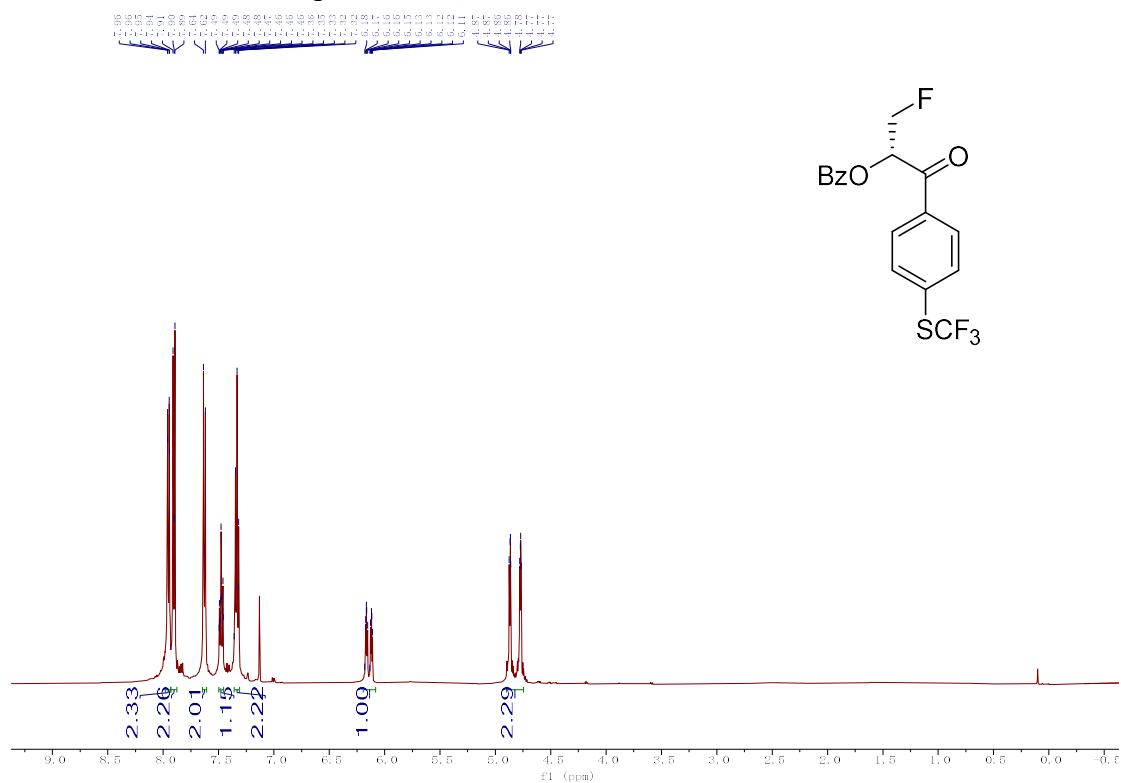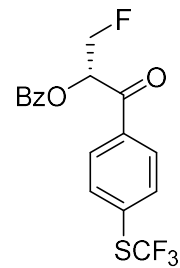

## $^1\text{H}$ NMR (500 MHz, Chloroform-*d*) of **2h**

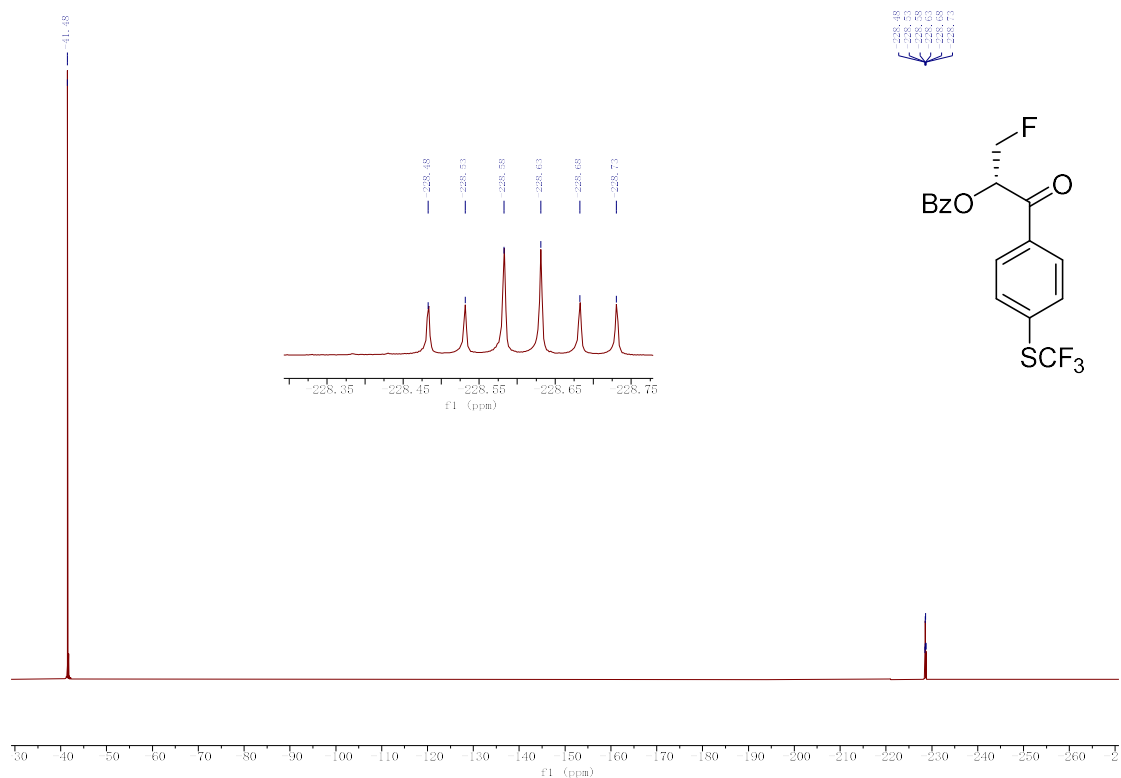

## $^{19}\text{F}$ NMR (470 MHz, Chloroform-*d*) of **2h**

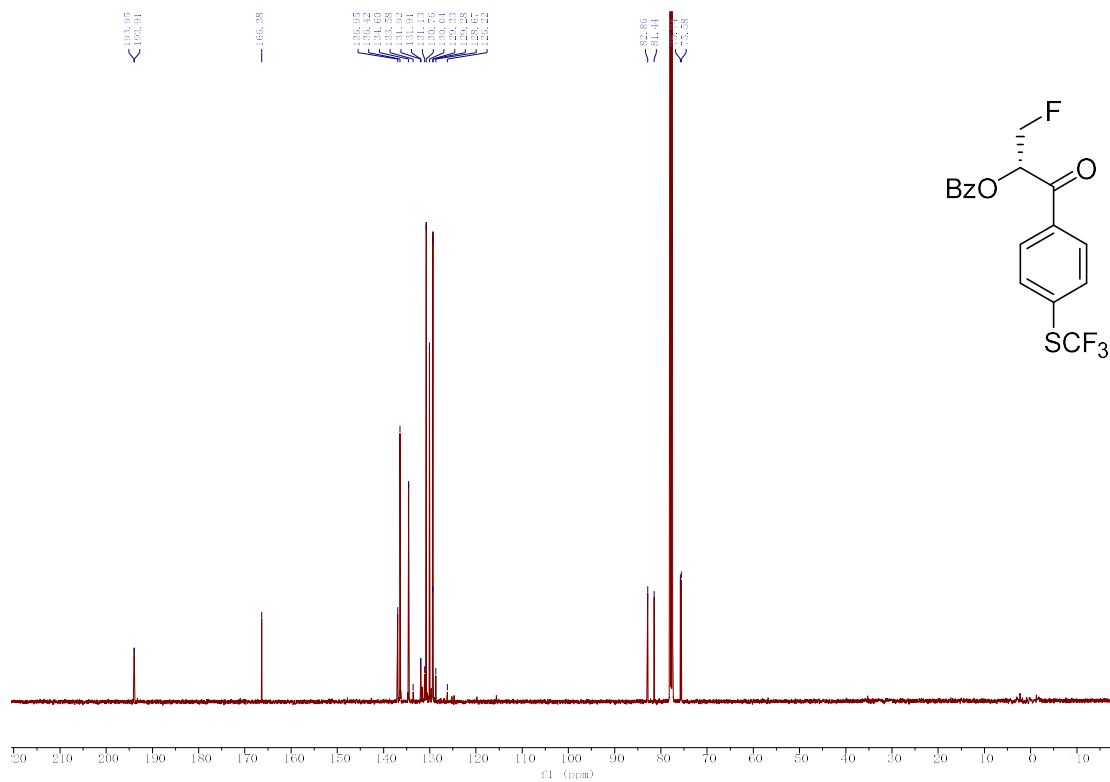

<sup>13</sup>C NMR (126 MHz, Chloroform-*d*) of **2h**  
<sup>1</sup>H, <sup>13</sup>C, and <sup>19</sup>F NMR spectra of **2i**

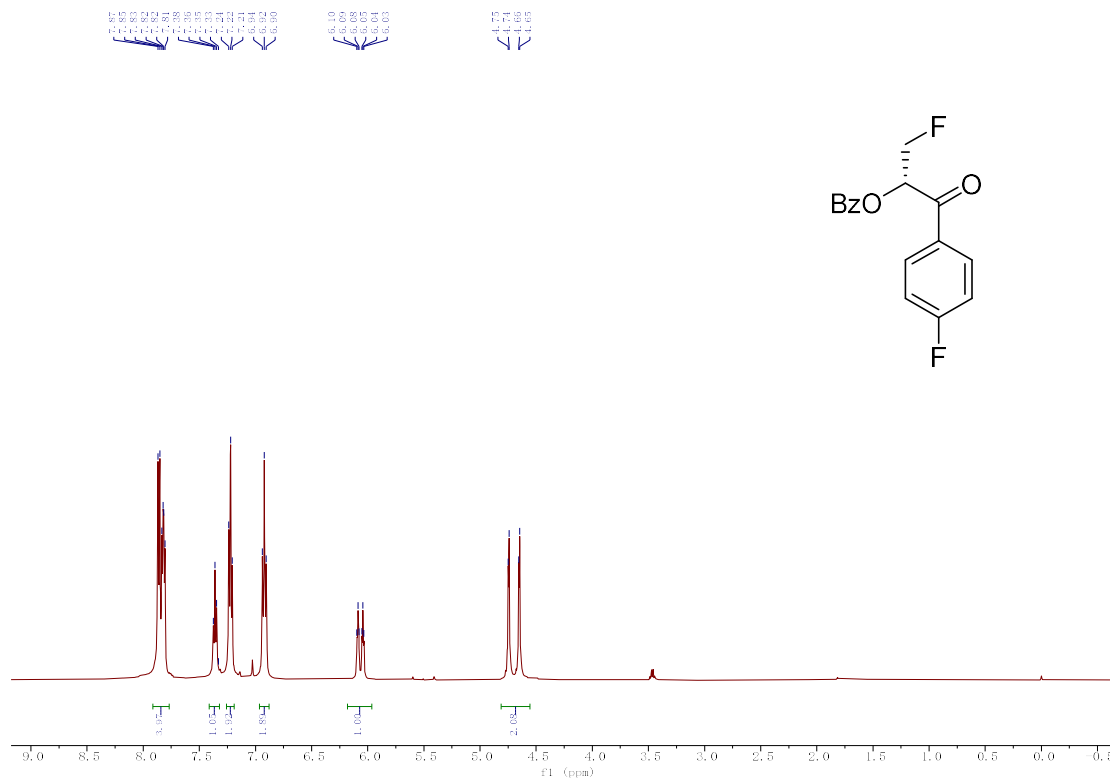

<sup>1</sup>H NMR (500 MHz, Chloroform-*d*) of **2i**

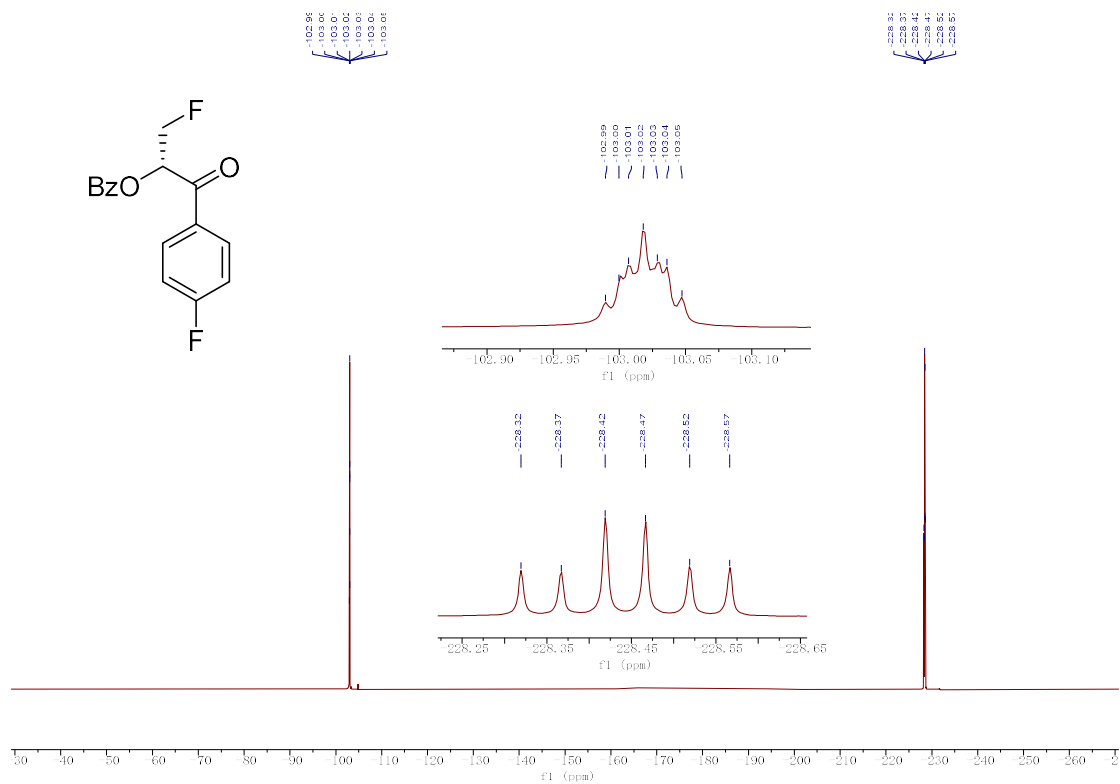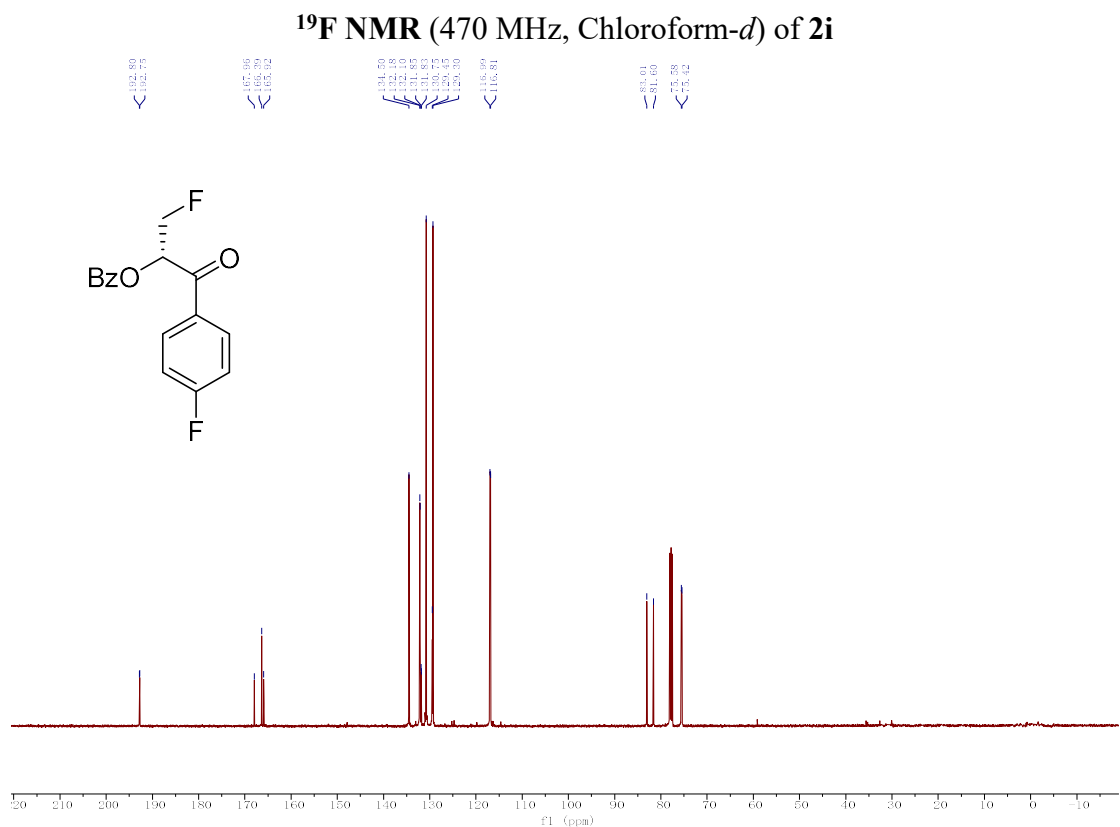

$^1\text{H}$ ,  $^{13}\text{C}$ , and  $^{19}\text{F}$  NMR spectra of **2j**

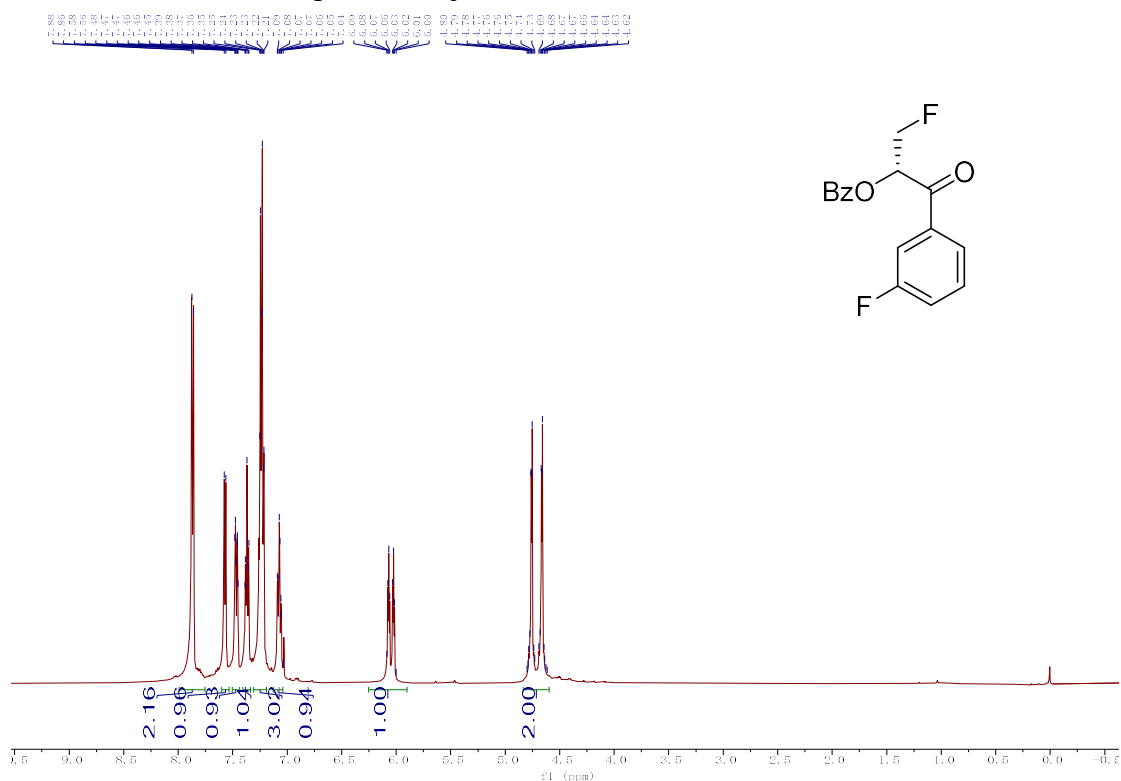

$^{13}\text{C}$  NMR (100 MHz, Chloroform-*d*) of **2j**

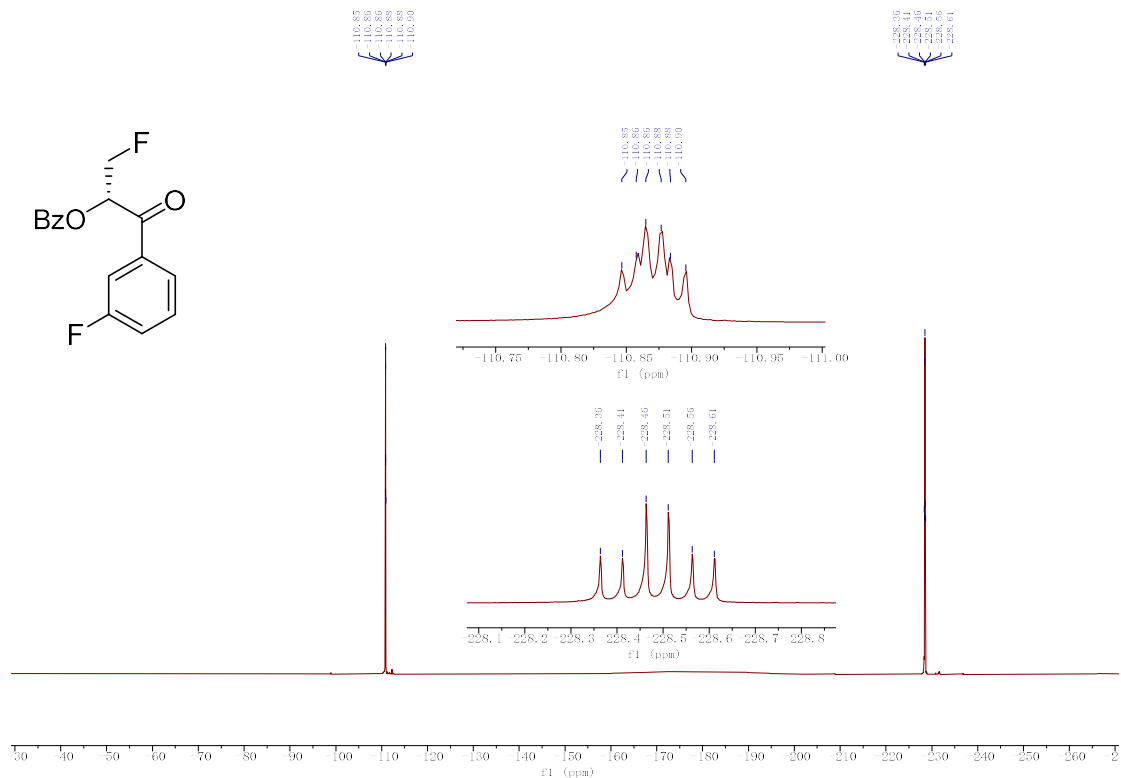

$^{19}\text{F}$  NMR (470 MHz, Chloroform-*d*) of **2j**



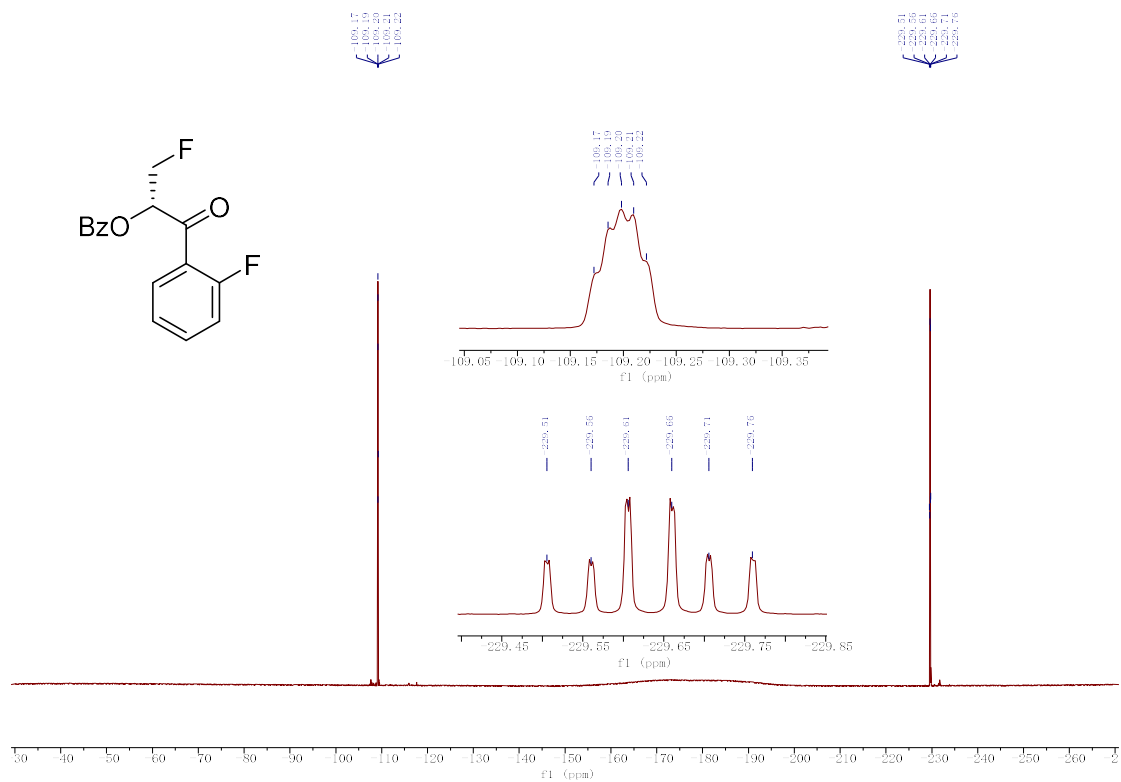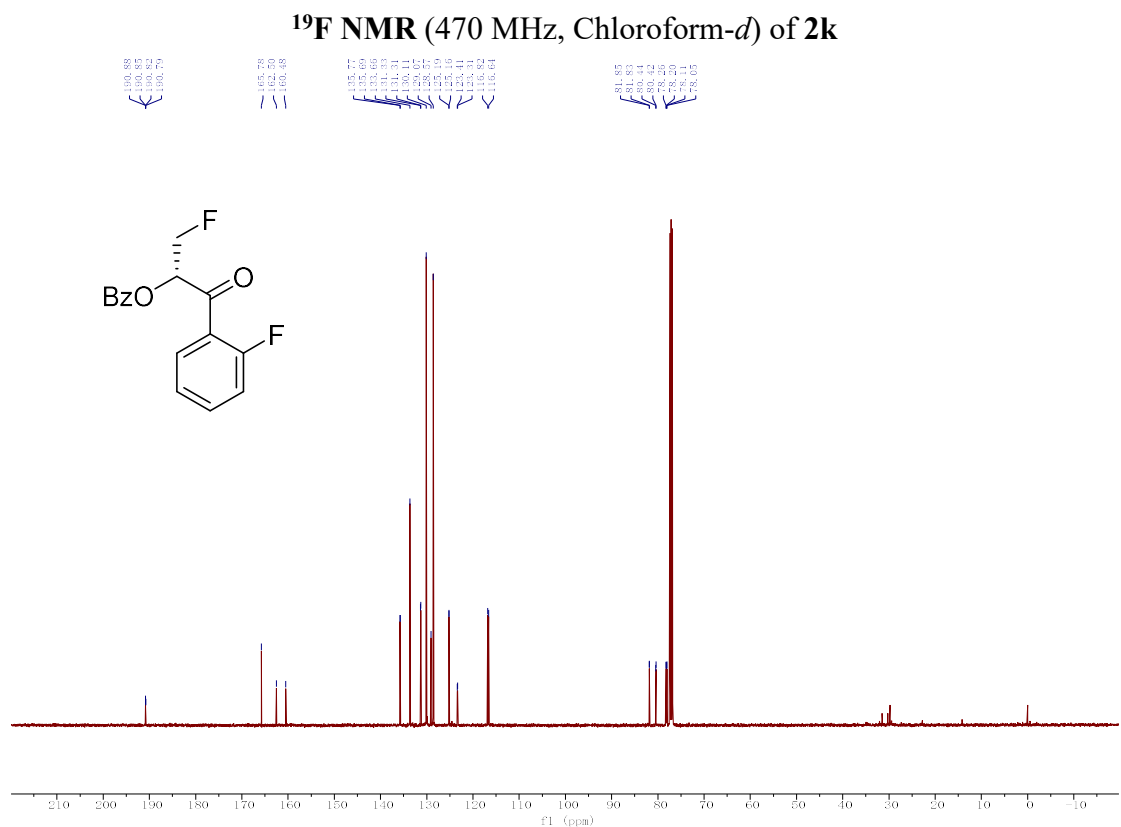

# $^1\text{H}$ , $^{13}\text{C}$ , and $^{19}\text{F}$ NMR spectra of **21**

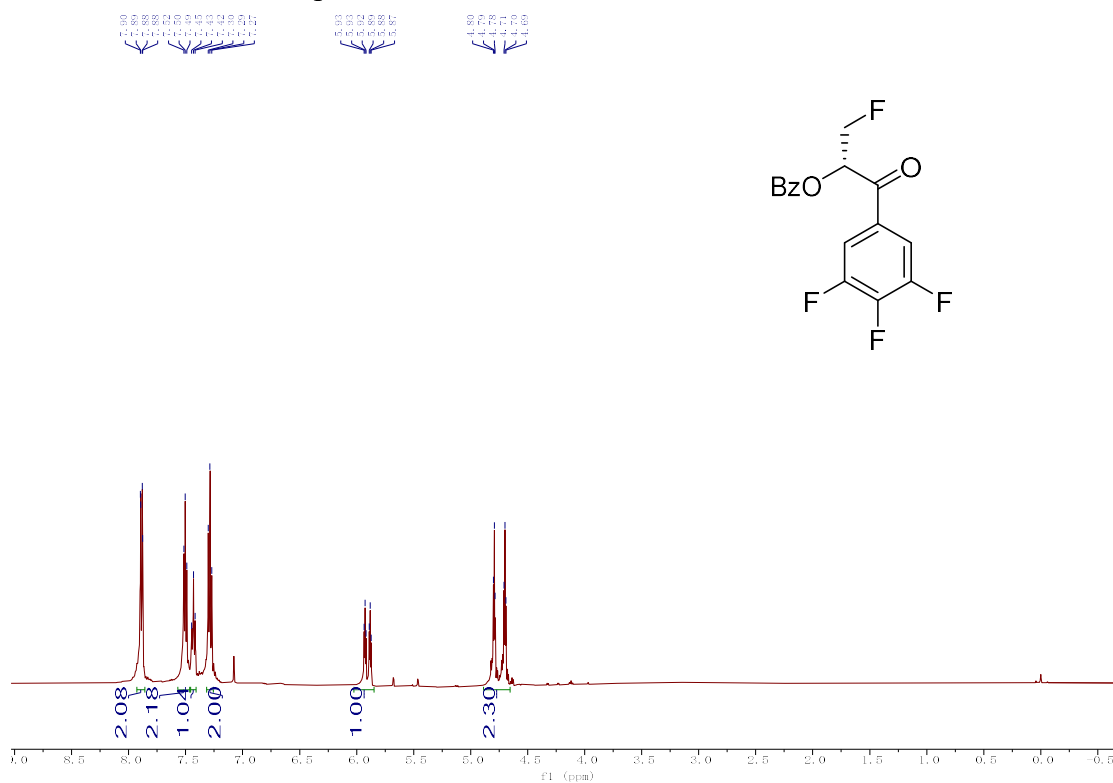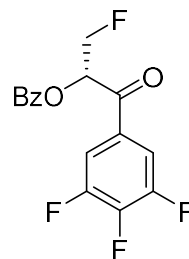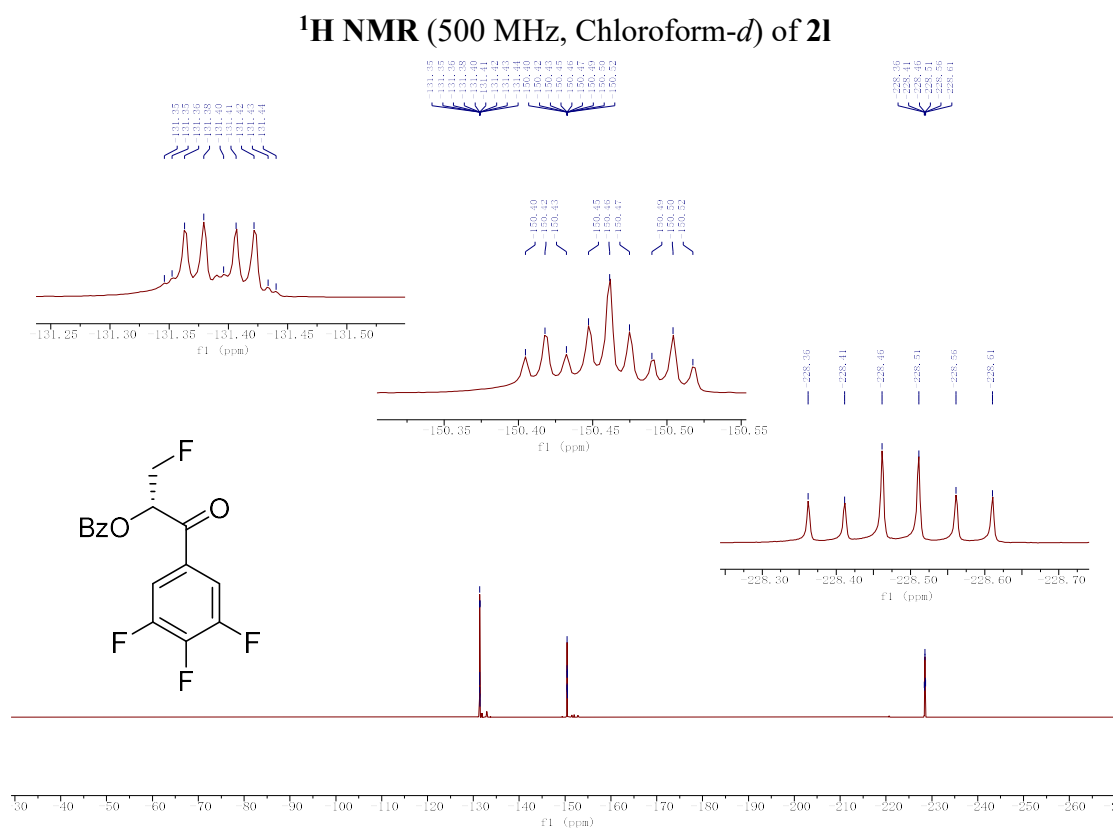

## $^{19}\text{F}$ NMR (470 MHz, Chloroform-*d*) of **21**



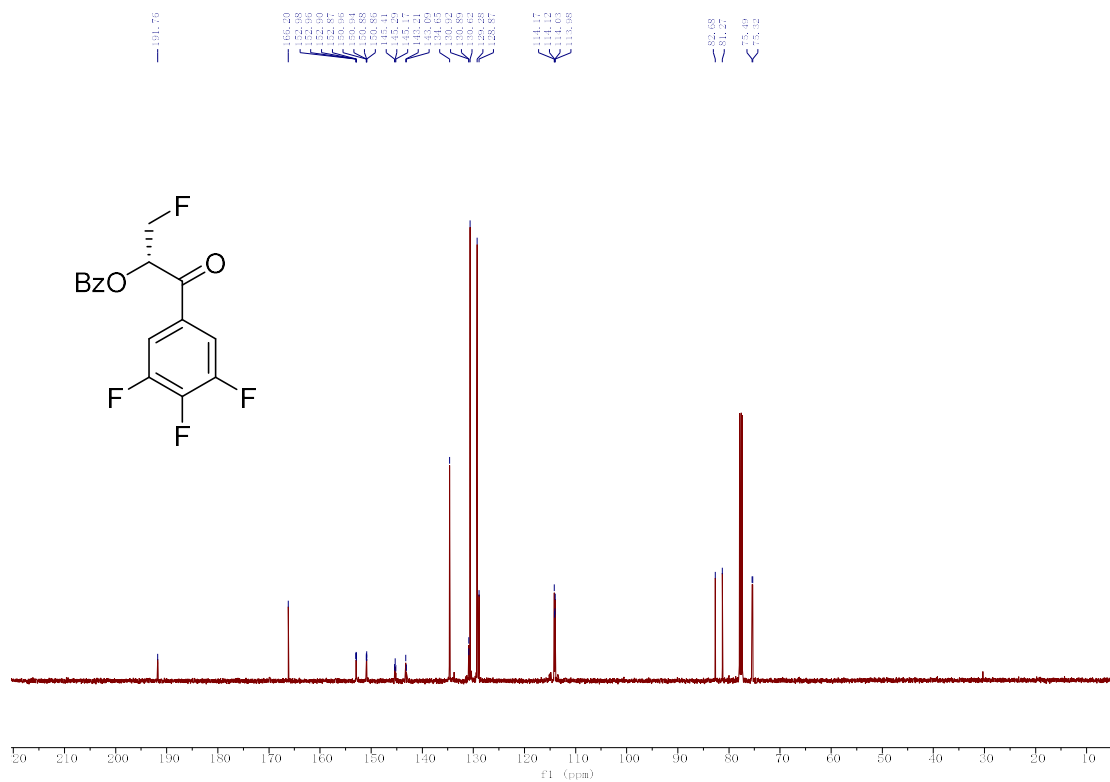

$^{13}\text{C}$  NMR (126 MHz, Chloroform-*d*) of **2l**  
 $^1\text{H}$ ,  $^{13}\text{C}$ , and  $^{19}\text{F}$  NMR spectra of **2m**

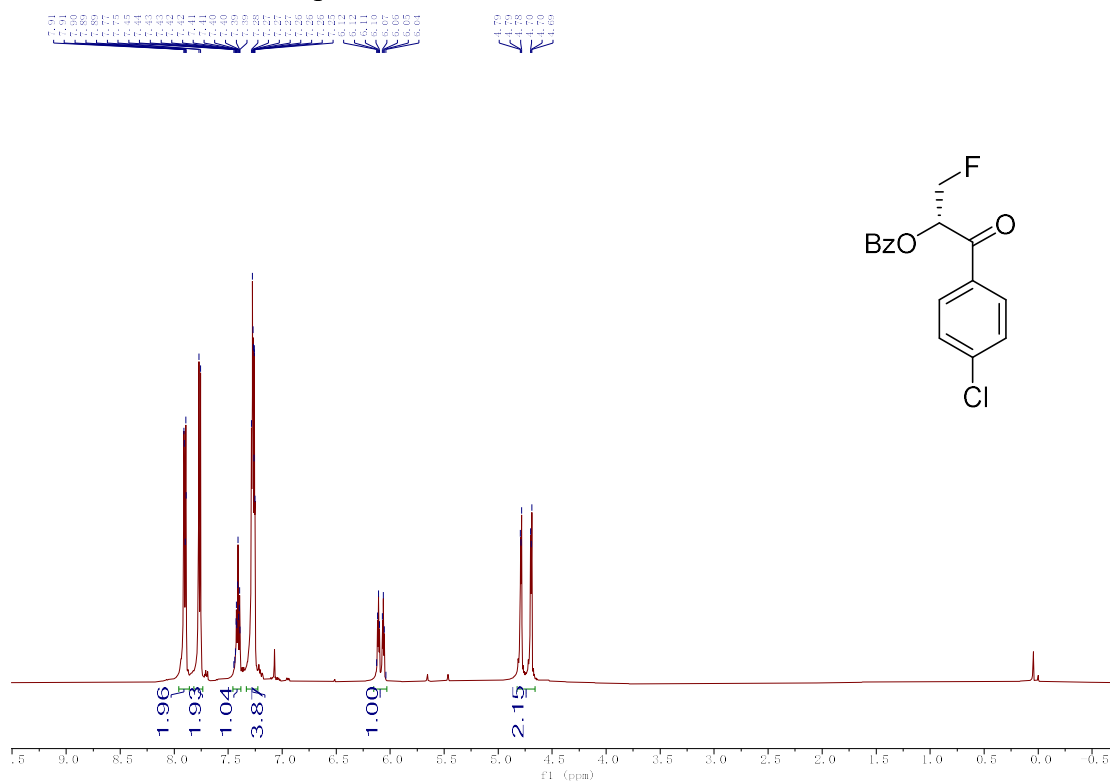

$^1\text{H}$  NMR (500 MHz, Chloroform-*d*) of **2m**

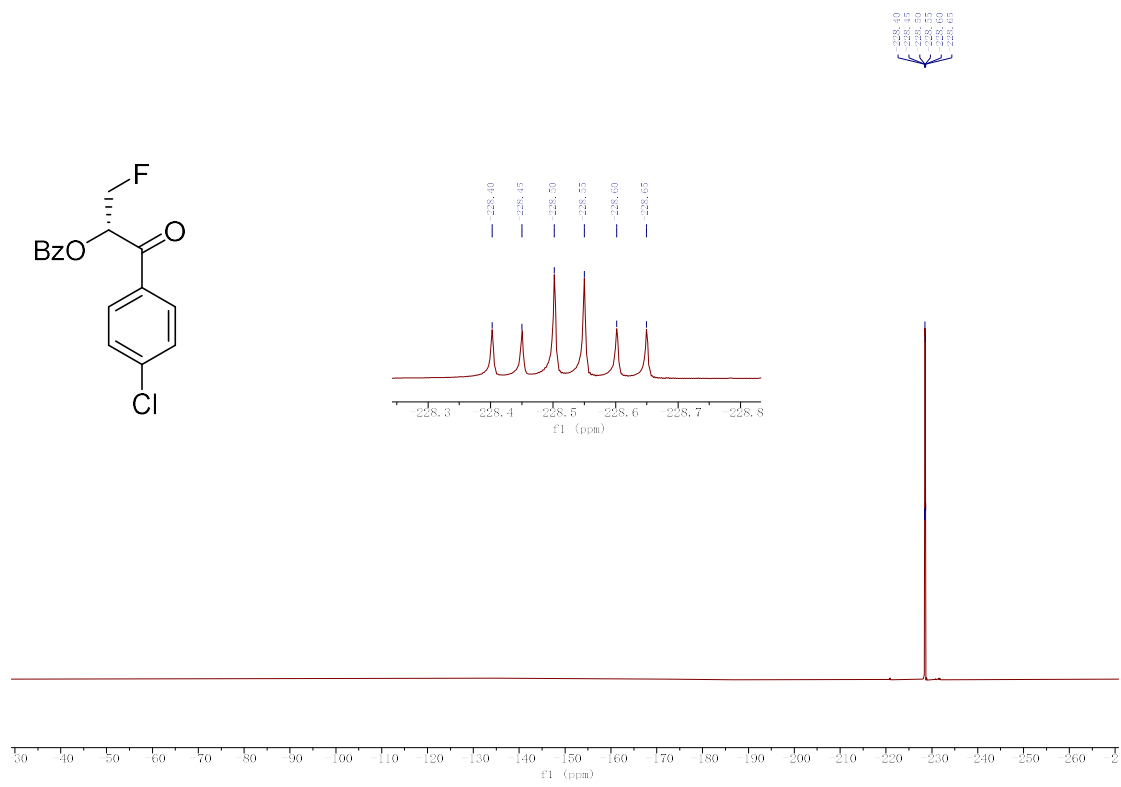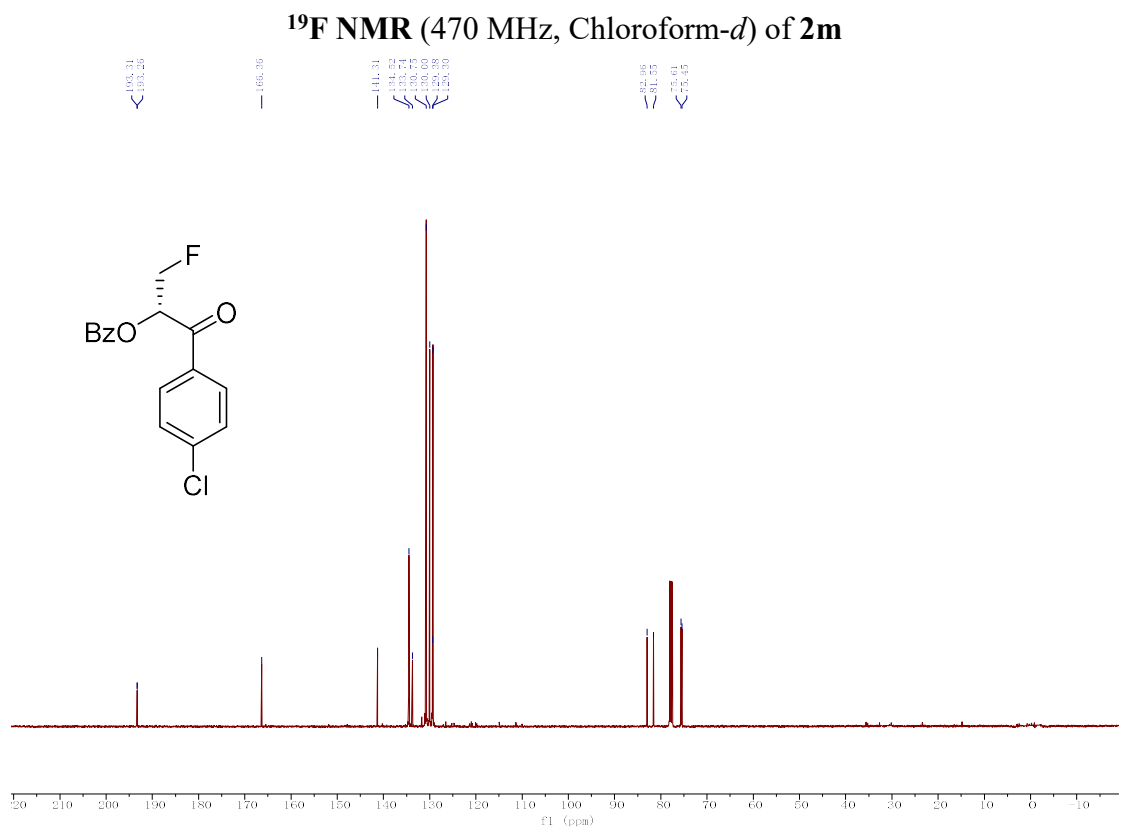

$^1\text{H}$ ,  $^{13}\text{C}$ , and  $^{19}\text{F}$  NMR spectra of **2n**

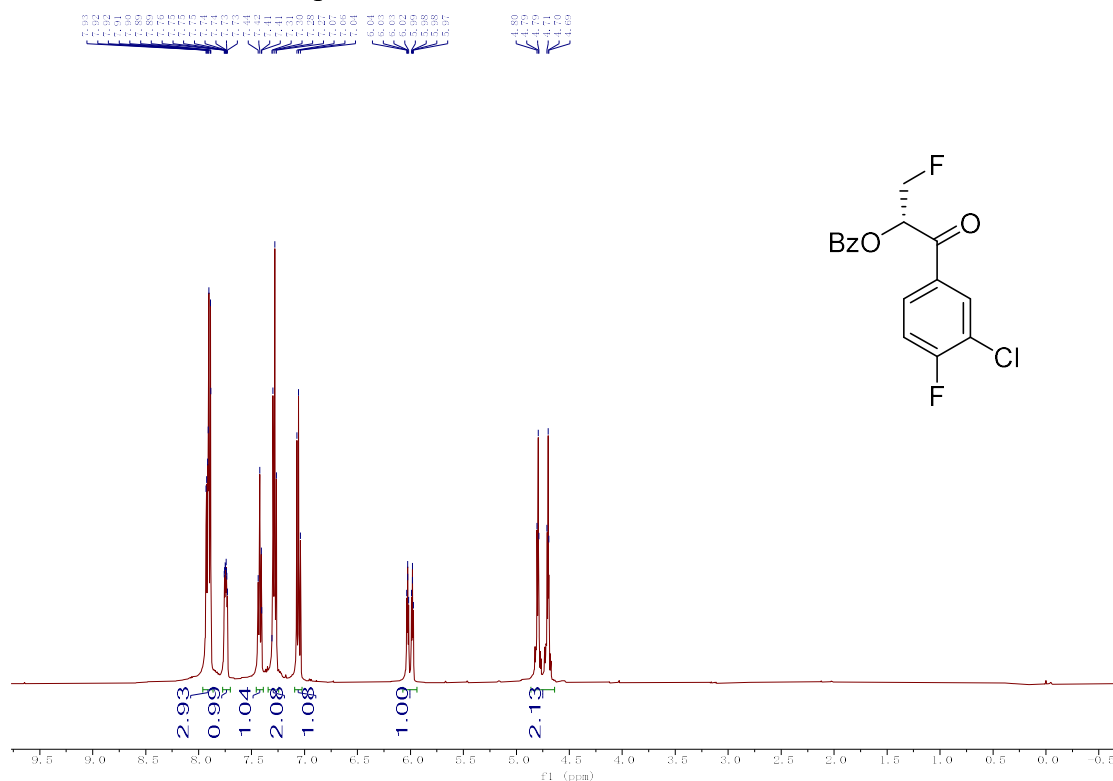

$^1\text{H}$  NMR (500 MHz, Chloroform-*d*) of **2n**

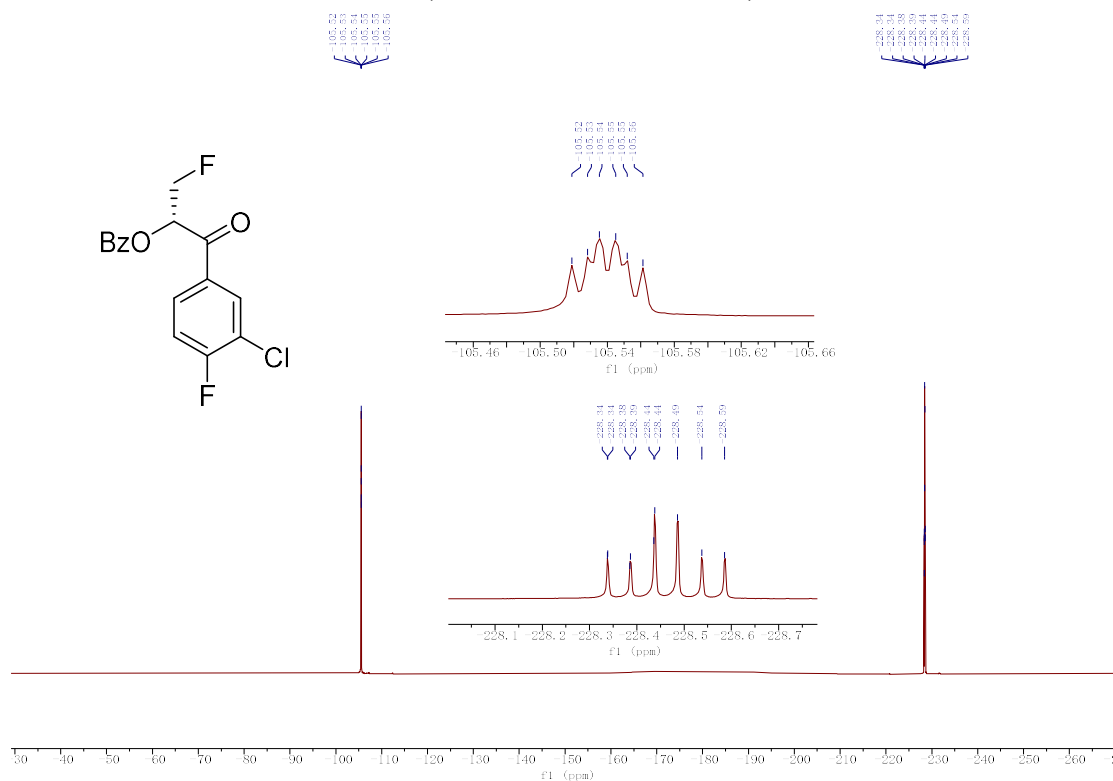

$^{19}\text{F}$  NMR (470 MHz, Chloroform-*d*) of **2n**

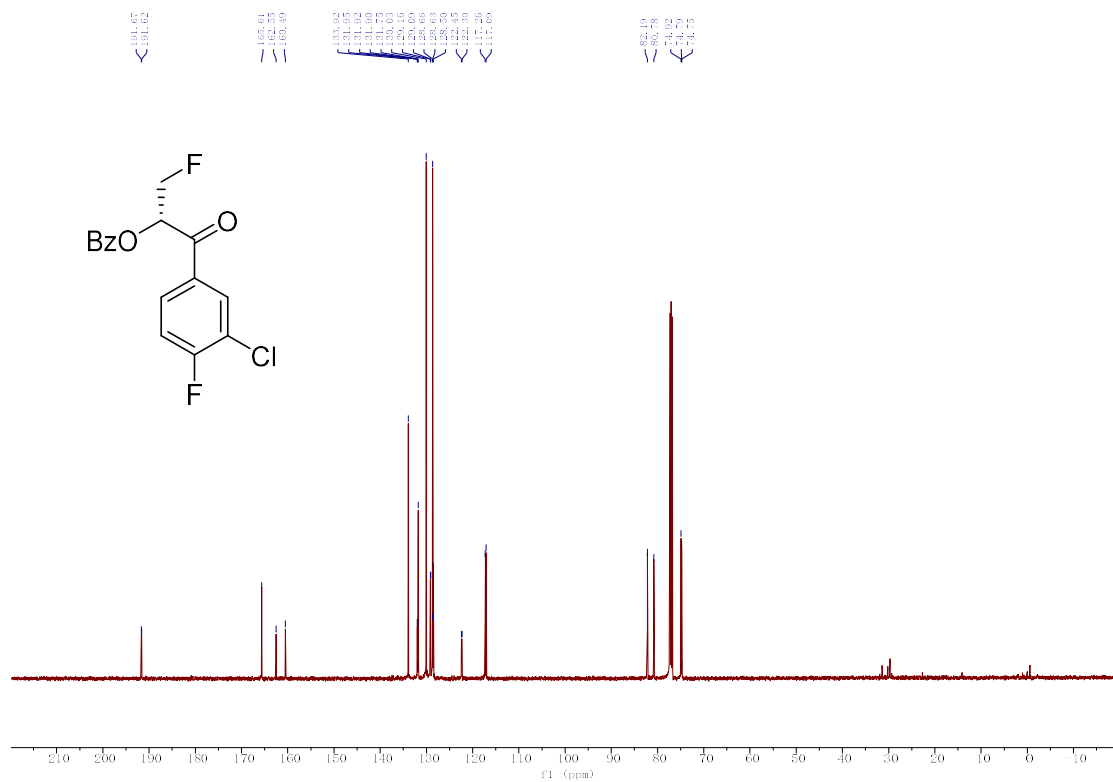

**$^{13}\text{C}$  NMR (126 MHz, Chloroform-*d*) of **2n****  
 $^1\text{H}$ ,  $^{13}\text{C}$ , and  $^{19}\text{F}$  NMR spectra of **2o**

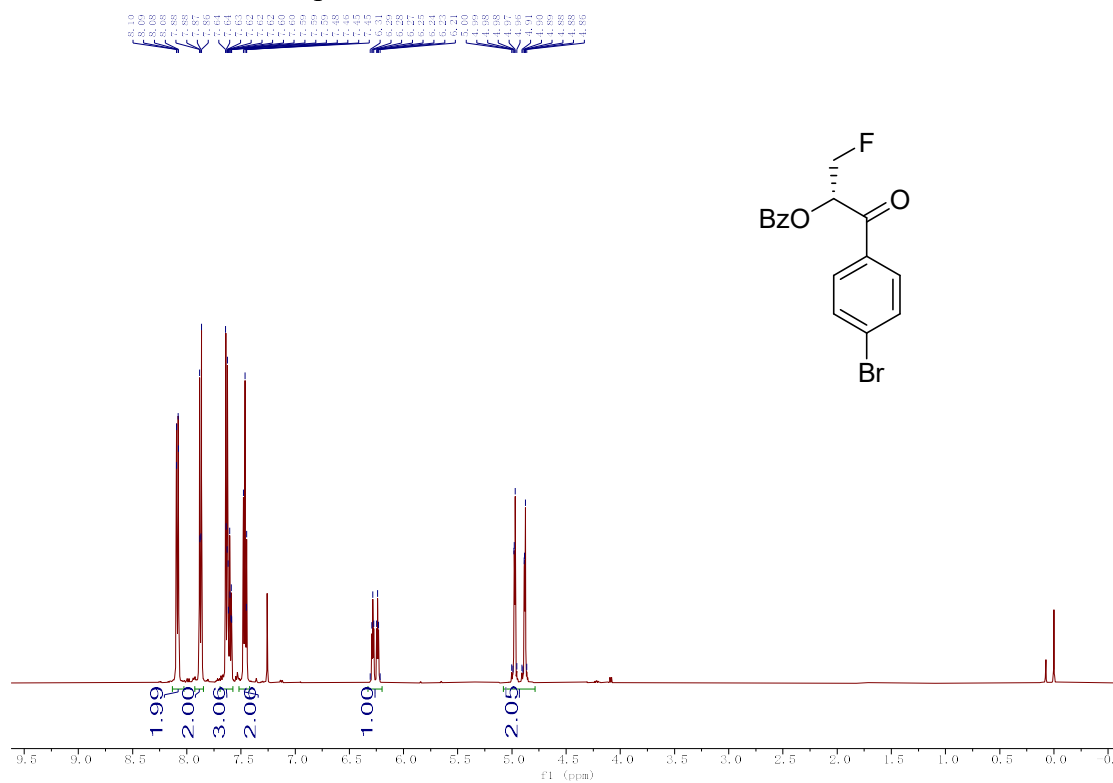

**$^1\text{H}$  NMR (500 MHz, Chloroform-*d*) of **2o****

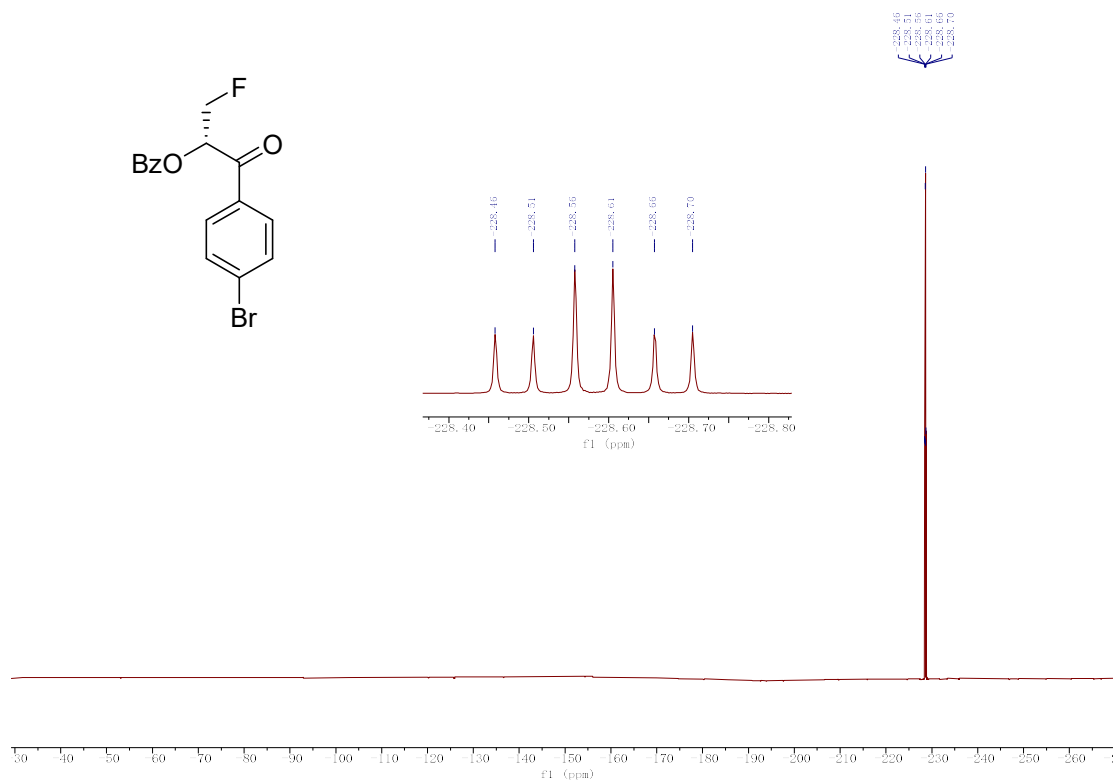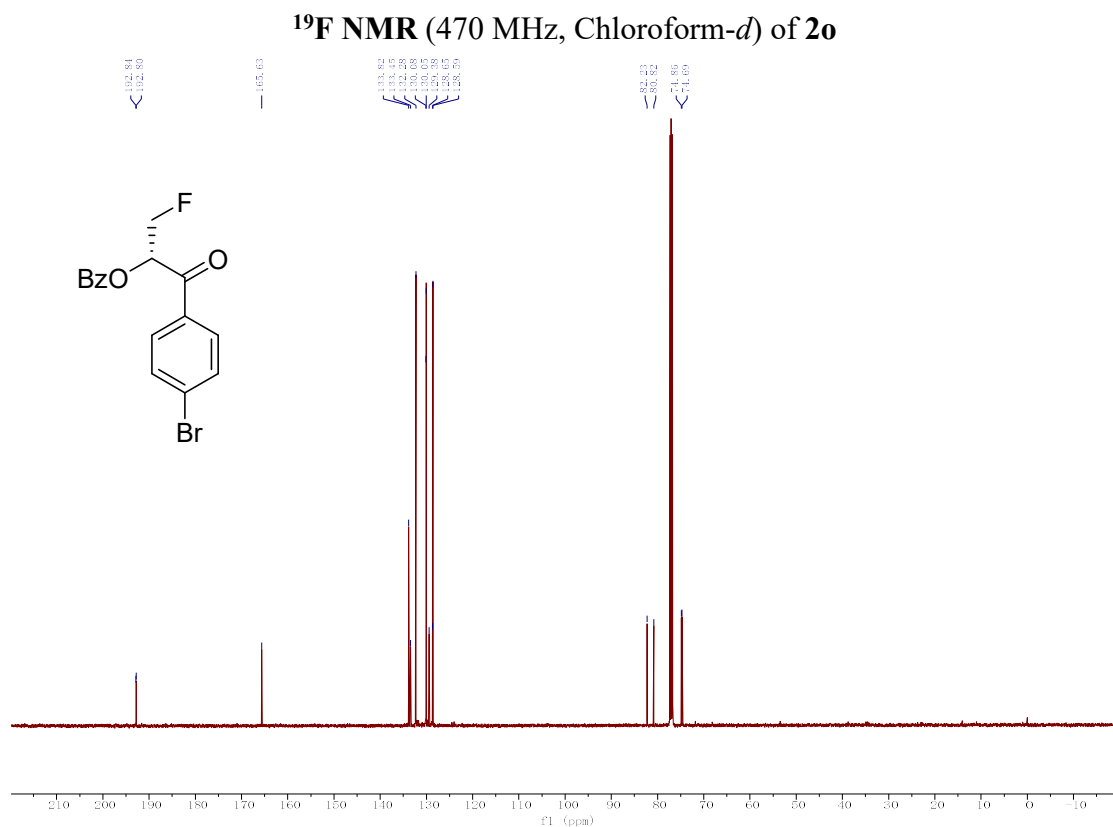

$^1\text{H}$ ,  $^{13}\text{C}$ , and  $^{19}\text{F}$  NMR spectra of **2p**

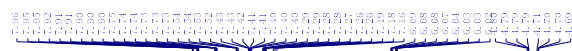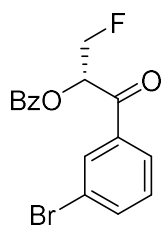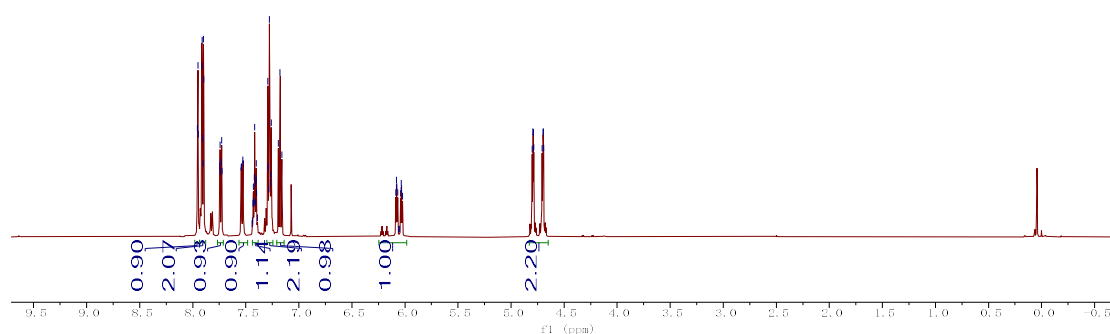

$^1\text{H}$  NMR (500 MHz, Chloroform-*d*) of **2p**

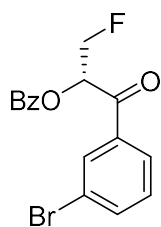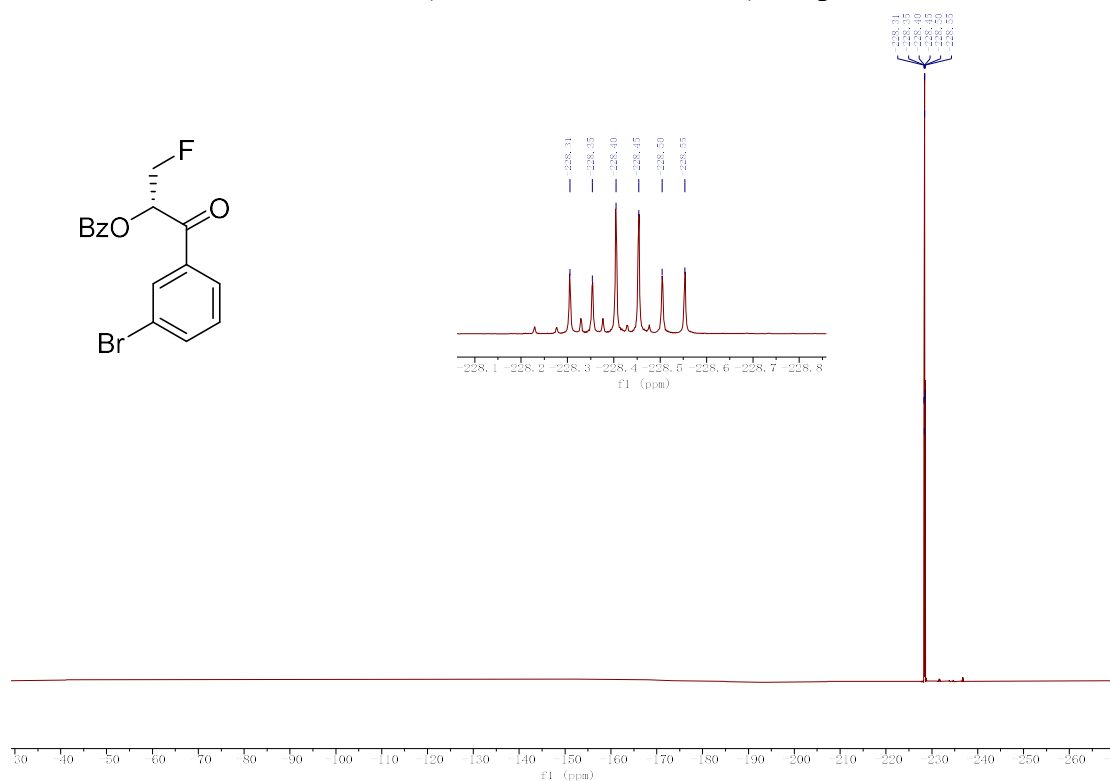

$^{19}\text{F}$  NMR (470 MHz, Chloroform-*d*) of **2p**

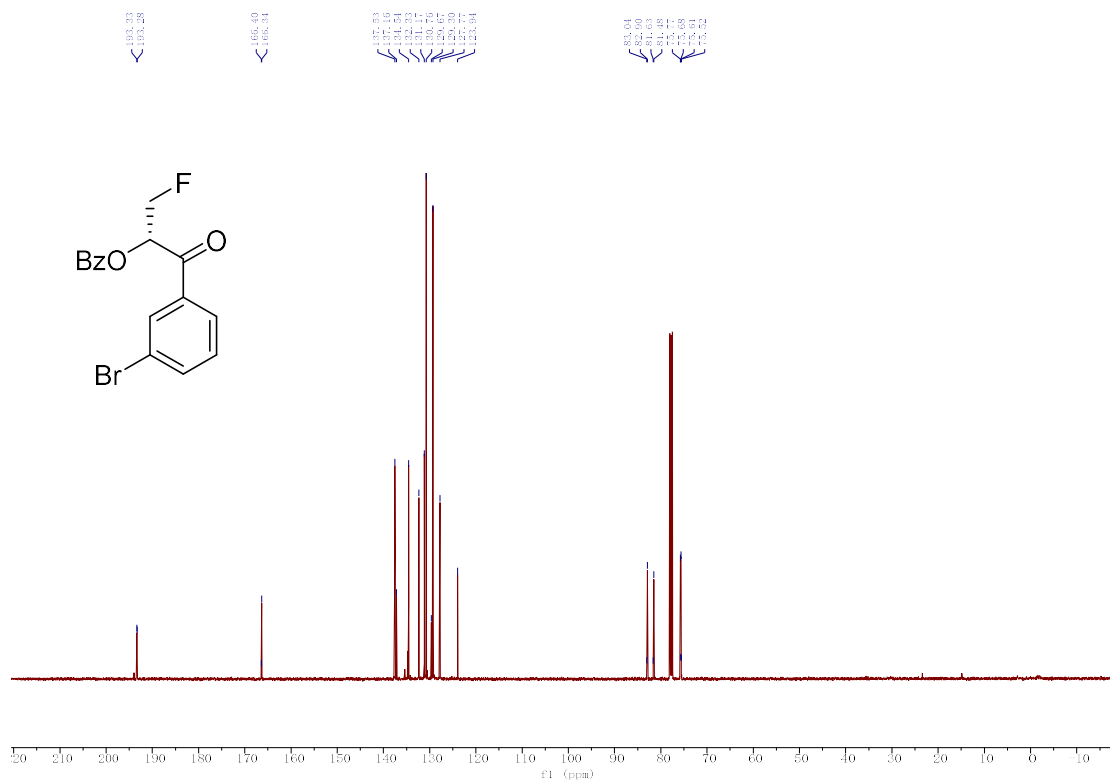

<sup>13</sup>C NMR (126 MHz, Chloroform-*d*) of 2p  
<sup>1</sup>H, <sup>13</sup>C, and <sup>19</sup>F NMR spectra of 2q

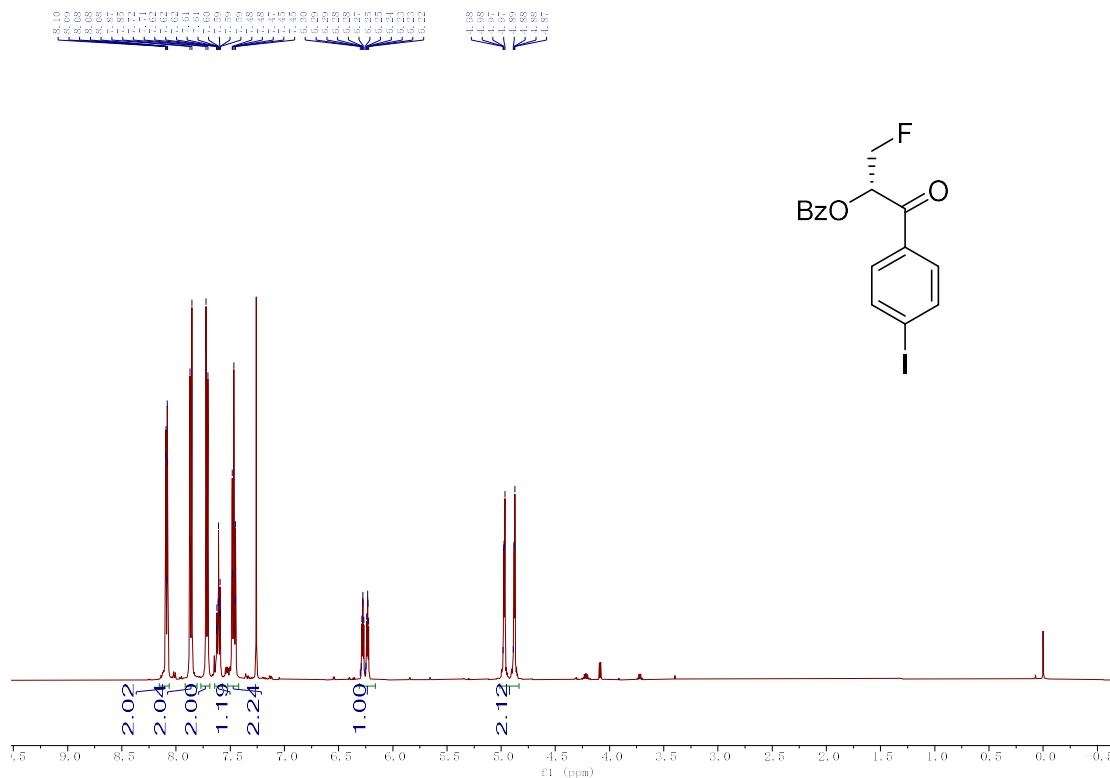

<sup>1</sup>H NMR (500 MHz, Chloroform-*d*) of 2q

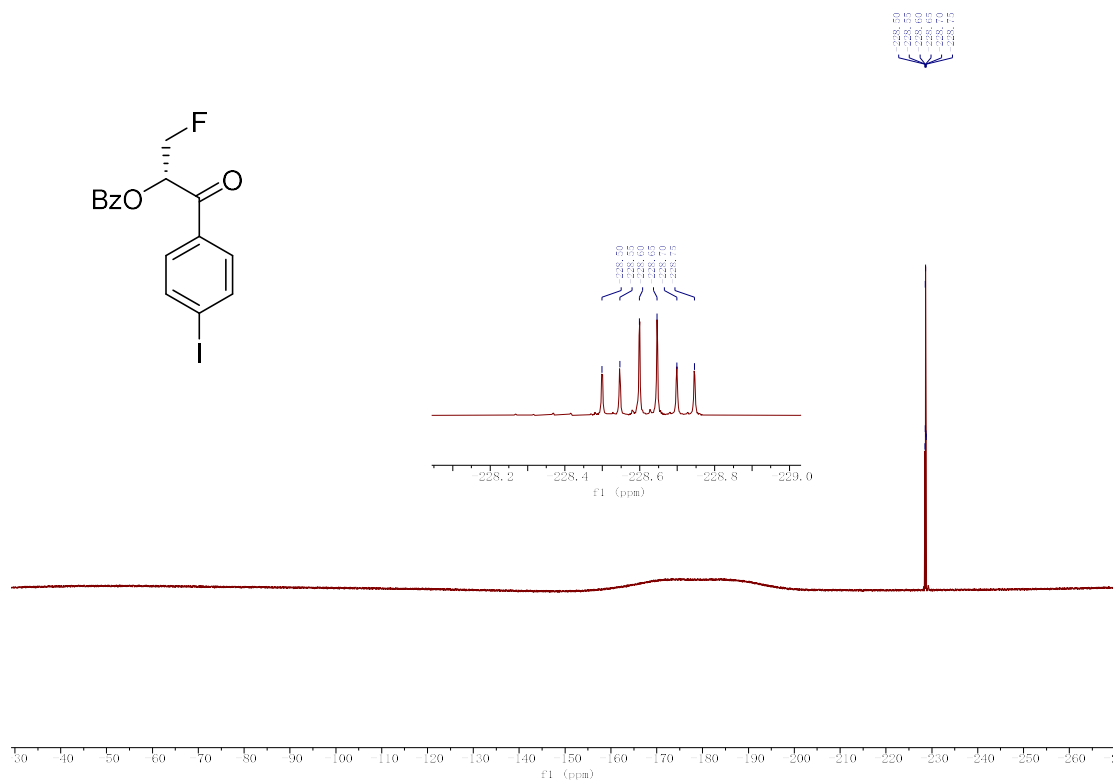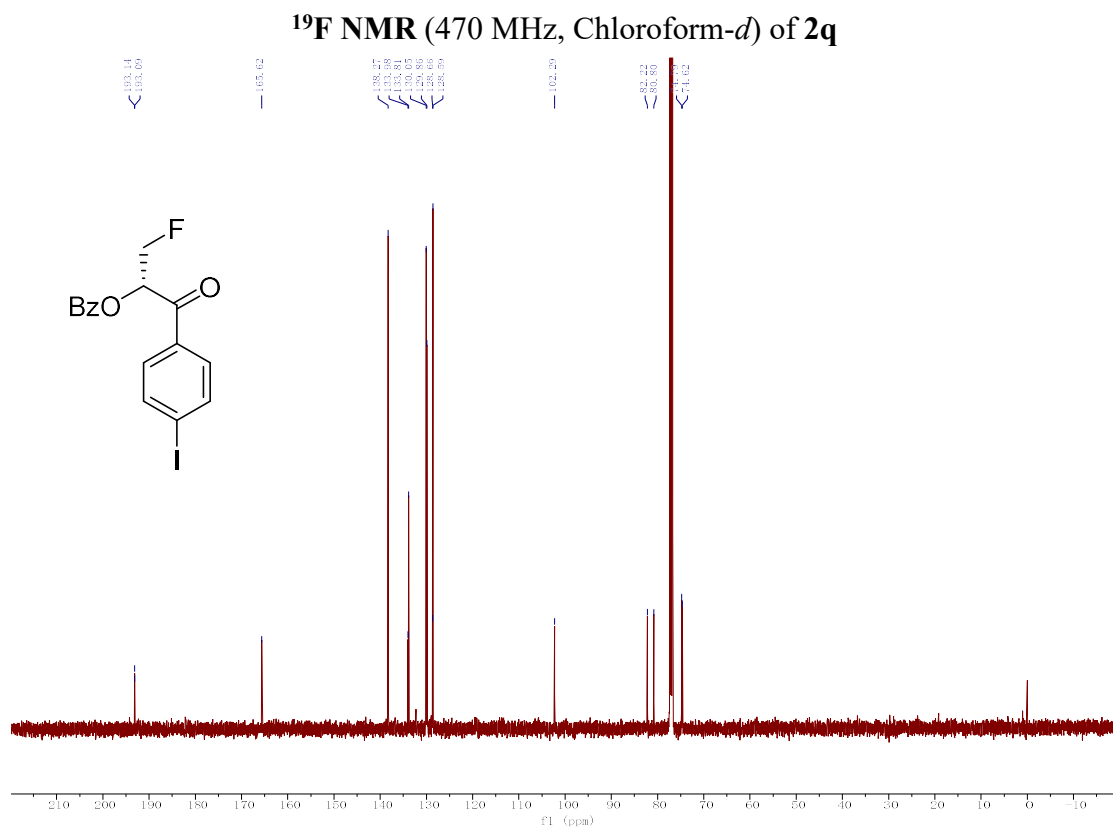



$^1\text{H}$ ,  $^{13}\text{C}$ , and  $^{19}\text{F}$  NMR spectra of **2r**

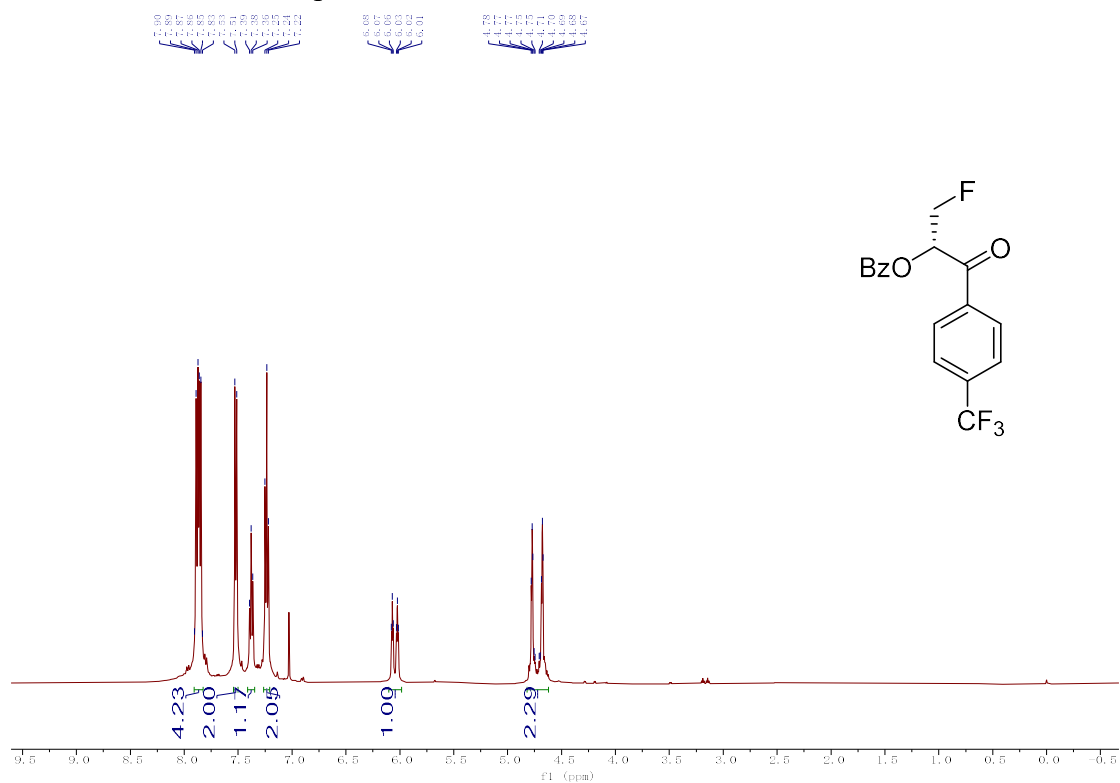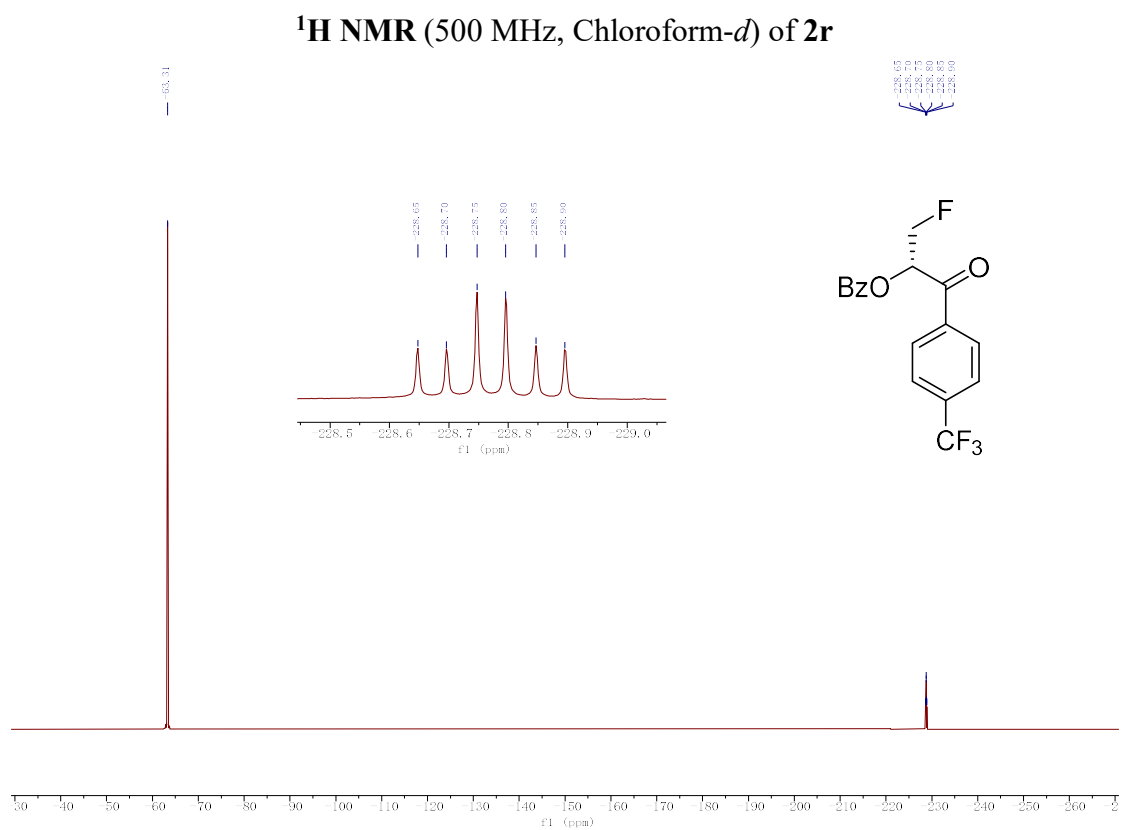

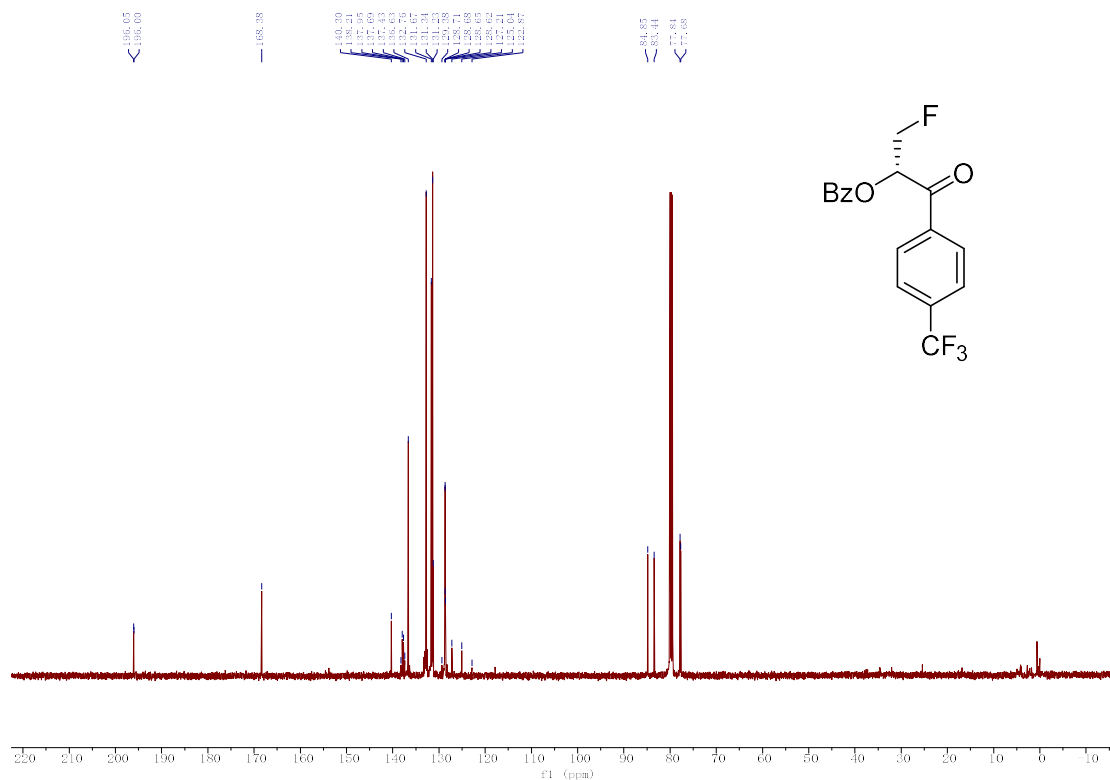

<sup>13</sup>C NMR (126 MHz, Chloroform-*d*) of **2r**  
<sup>1</sup>H, <sup>13</sup>C, and <sup>19</sup>F NMR spectra of **2s**

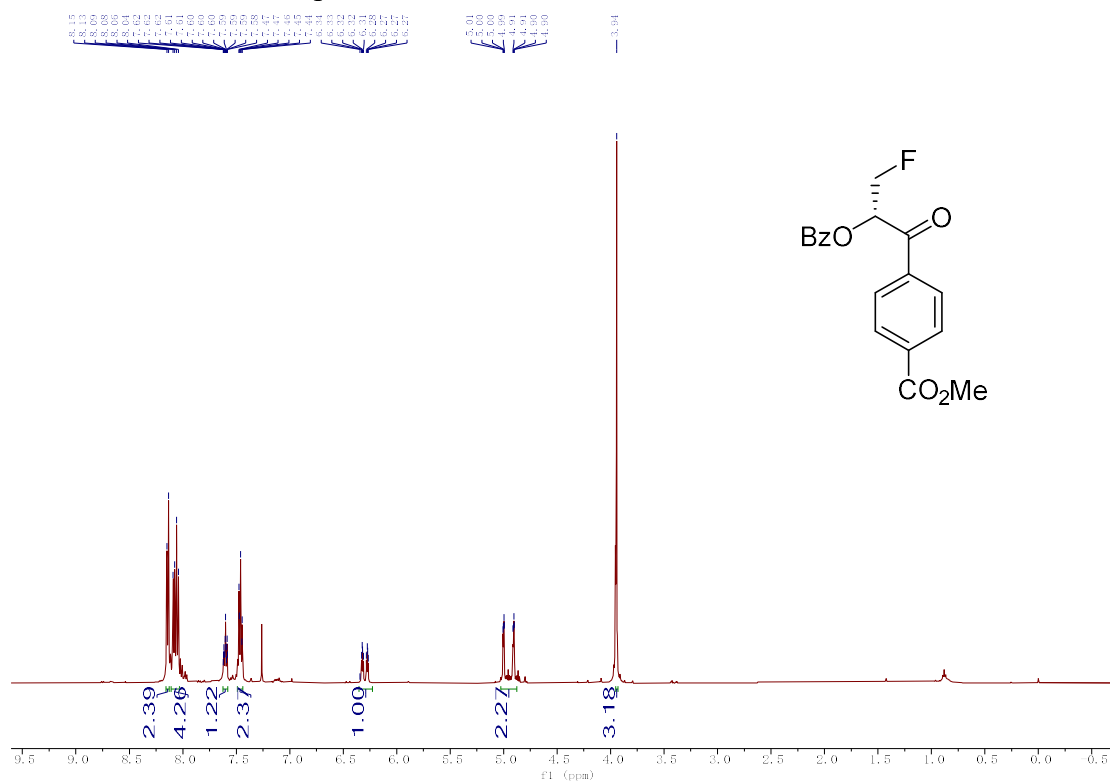

<sup>1</sup>H NMR (500 MHz, Chloroform-*d*) of **2s**

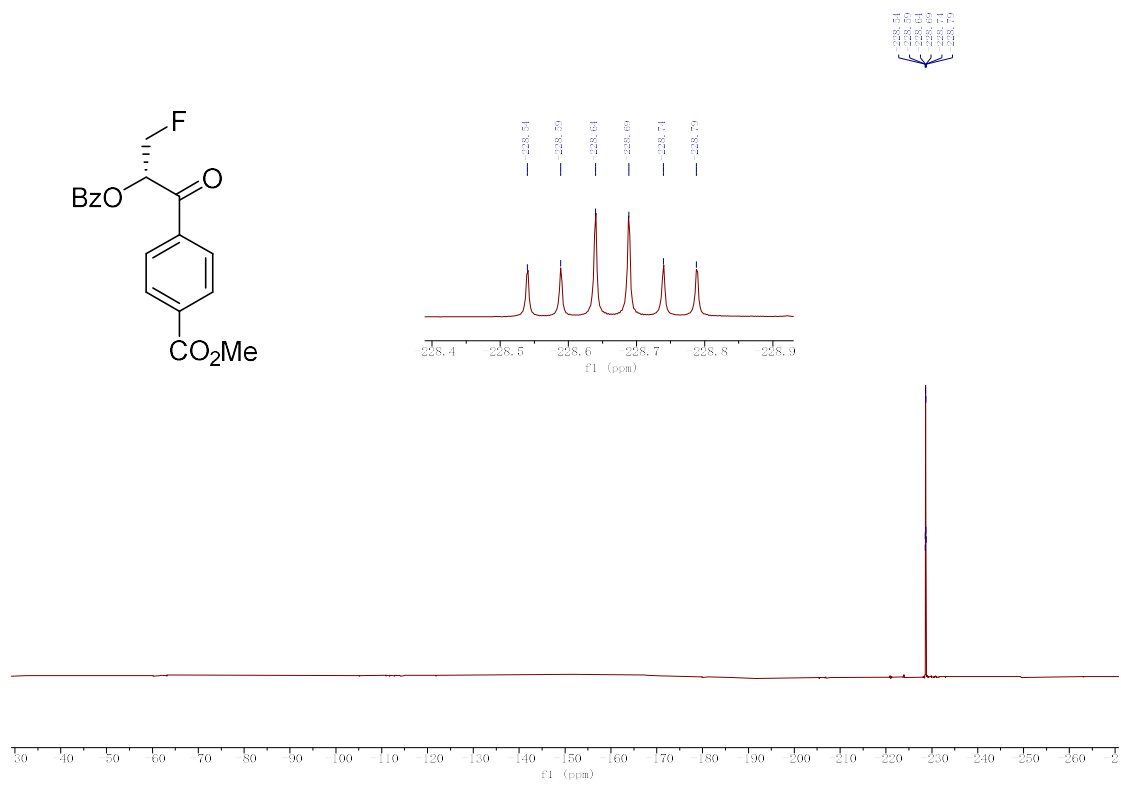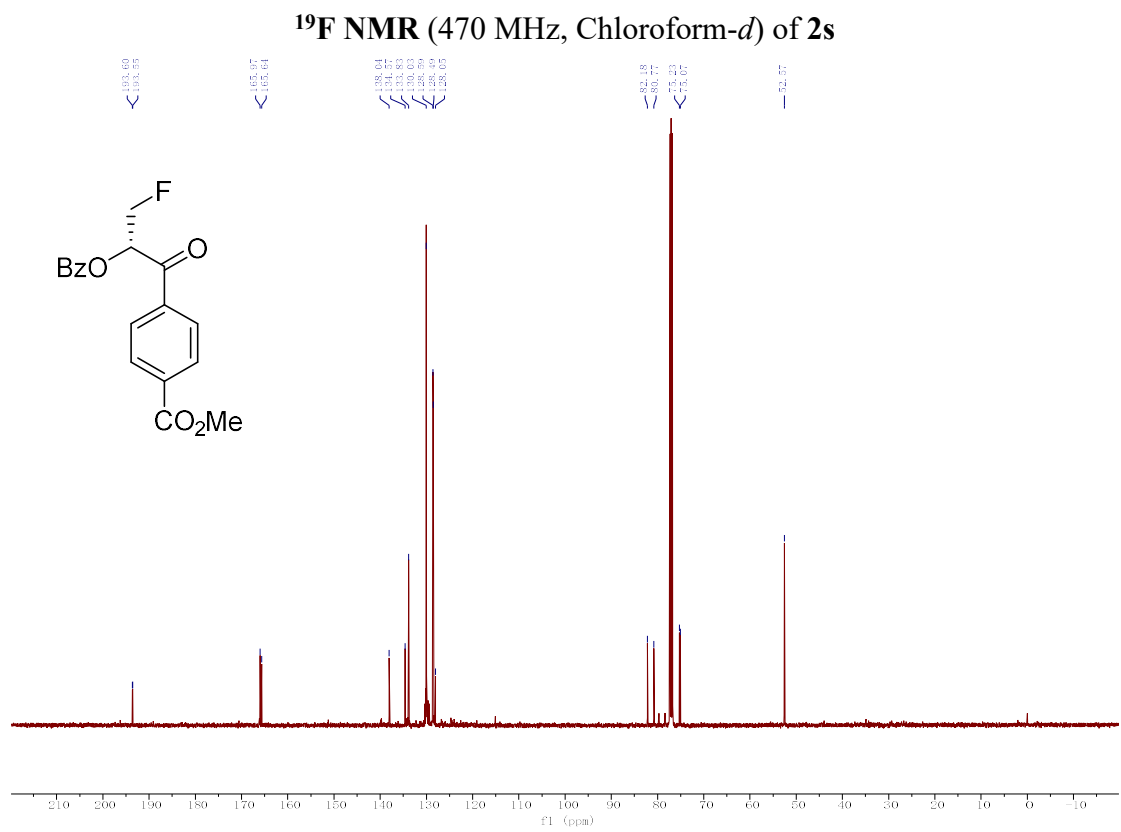

# $^1\text{H}$ , $^{13}\text{C}$ , and $^{19}\text{F}$ NMR spectra of **2t**

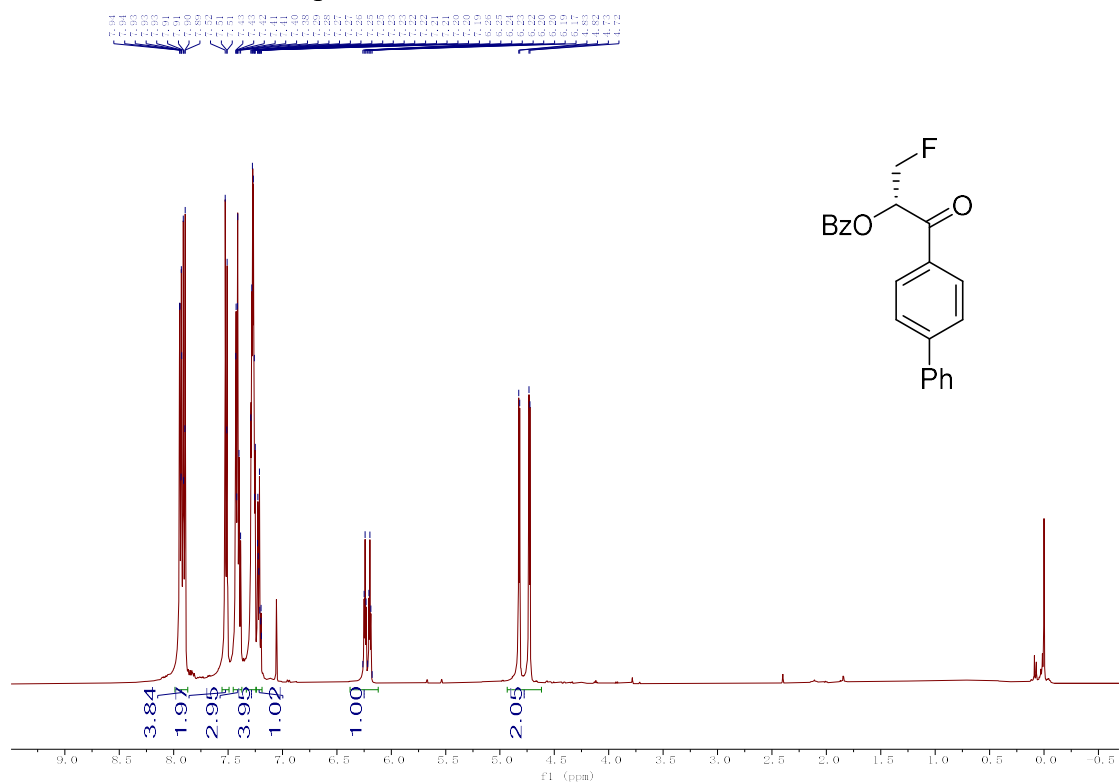

$^1\text{H}$  NMR (500 MHz, Chloroform-*d*) of **2t**

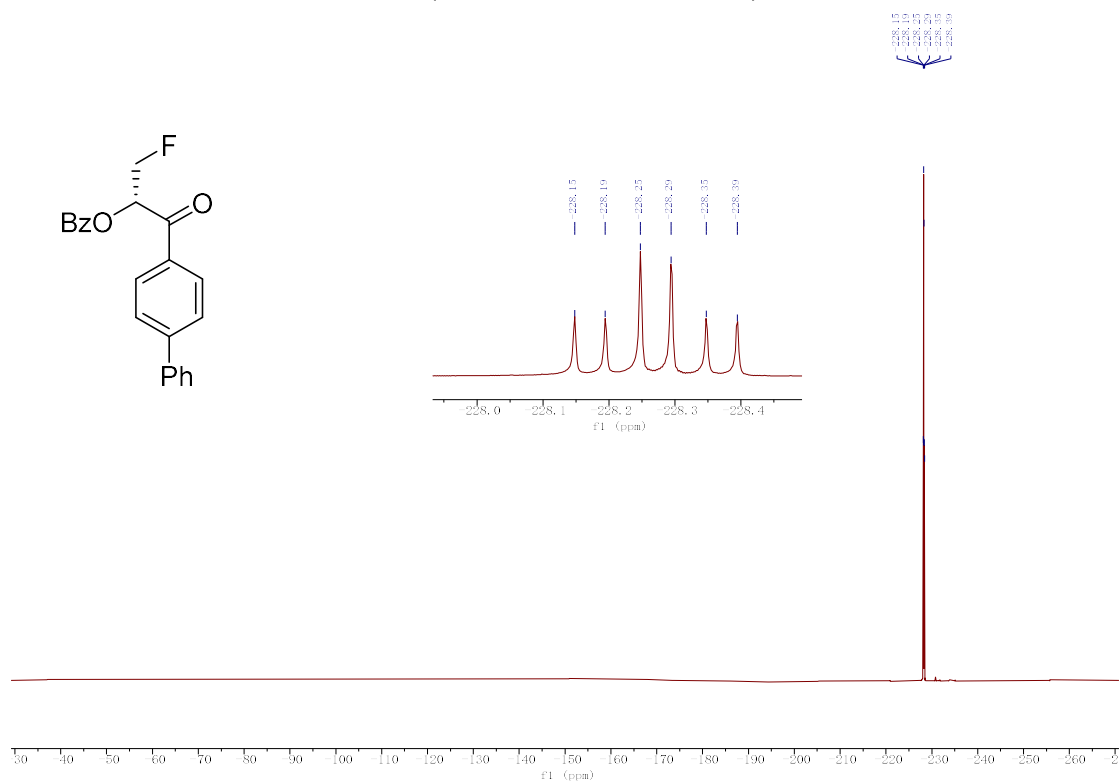

$^{19}\text{F}$  NMR (470 MHz, Chloroform-*d*) of **2t**



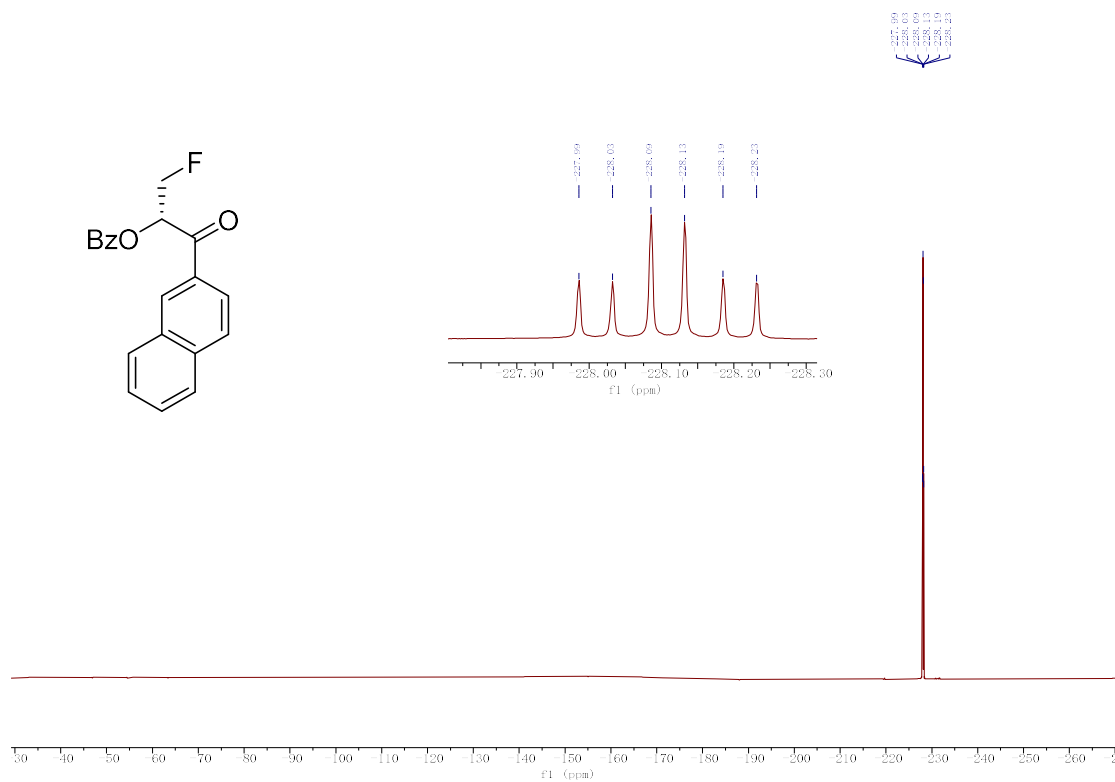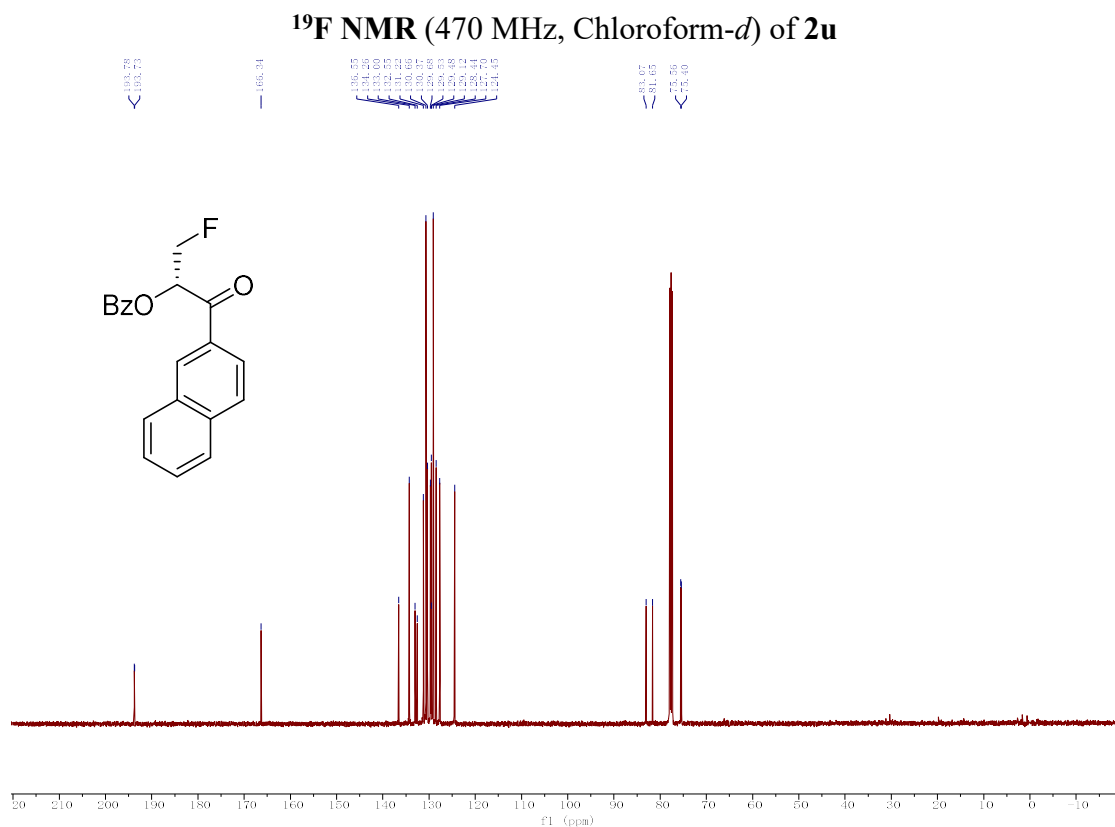

# <sup>1</sup>H, <sup>13</sup>C, and <sup>19</sup>F NMR spectra of **2v**

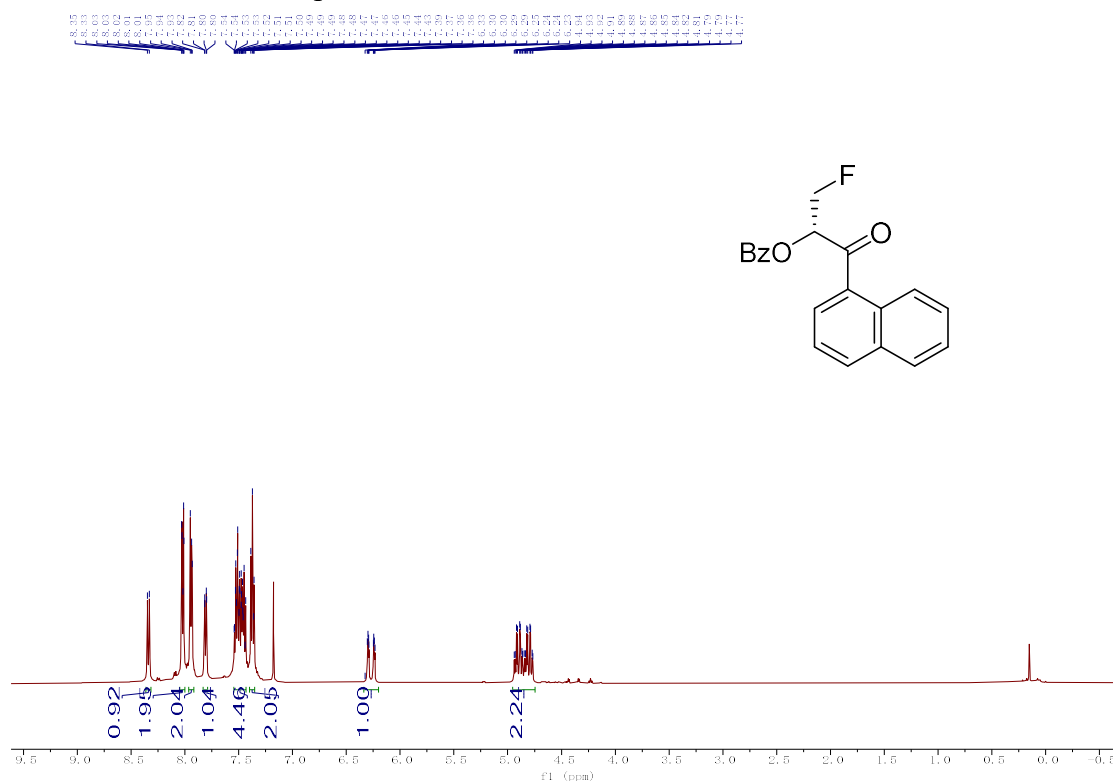

<sup>1</sup>H NMR (500 MHz, Chloroform-d) of **2v**

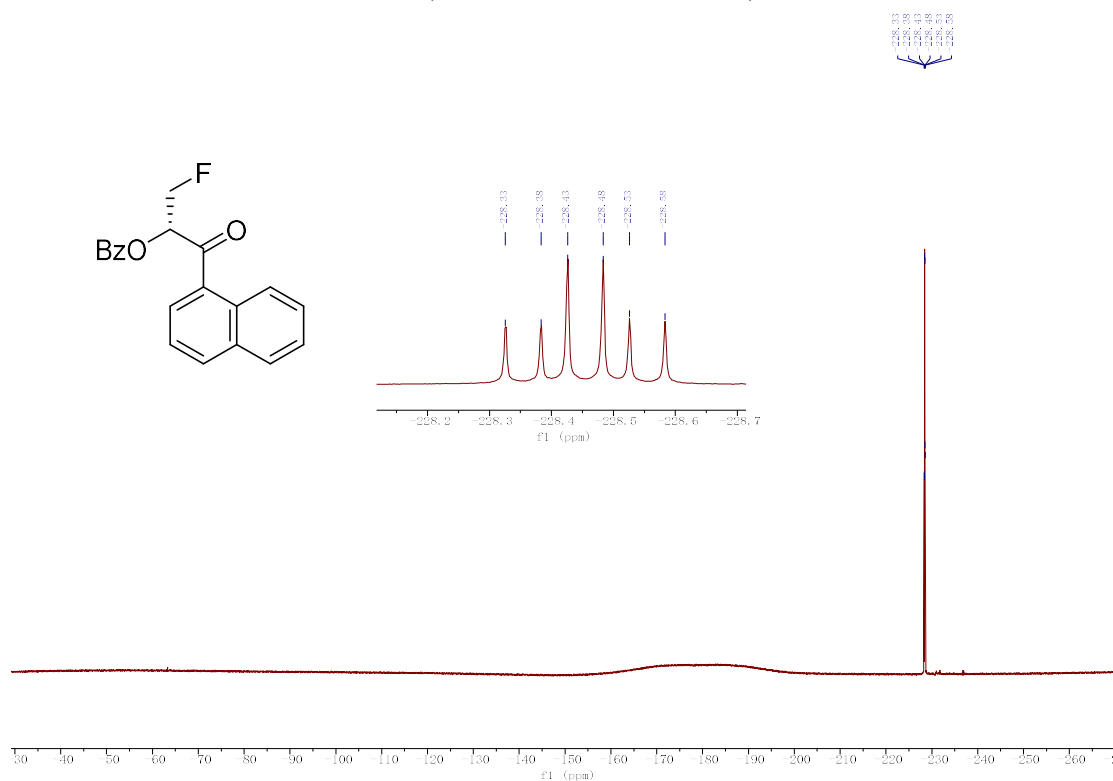

<sup>19</sup>F NMR (470 MHz, Chloroform-d) of **2v**

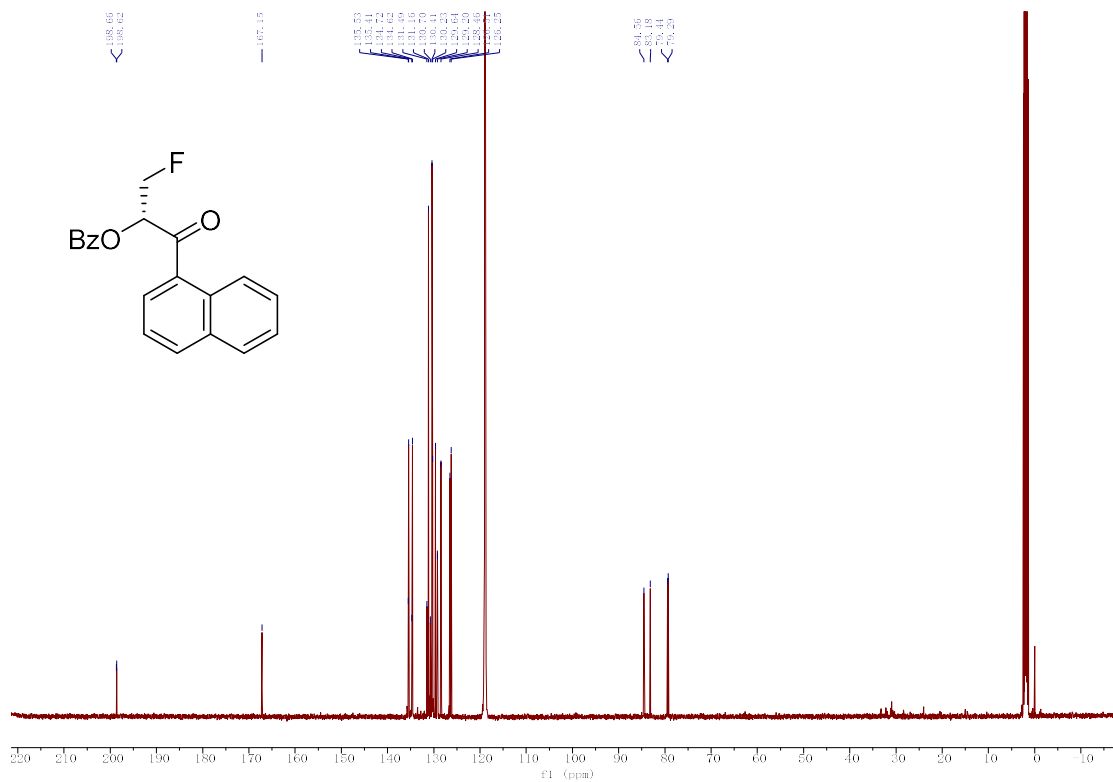

$^{13}\text{C}$  NMR (126 MHz, Acetonitrile- $d_3$ ) of 2v  
 $^1\text{H}$ ,  $^{13}\text{C}$ , and  $^{19}\text{F}$  NMR spectra of 2w

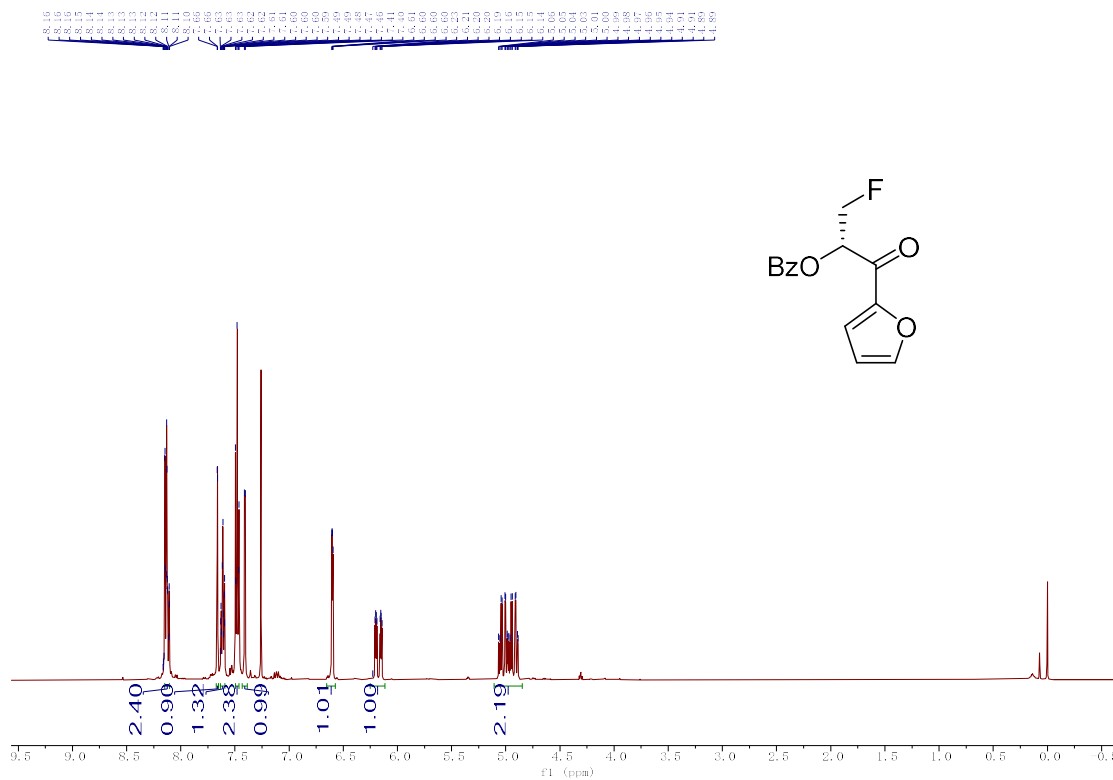

$^1\text{H}$  NMR (500 MHz, Chloroform- $d$ ) of 2w



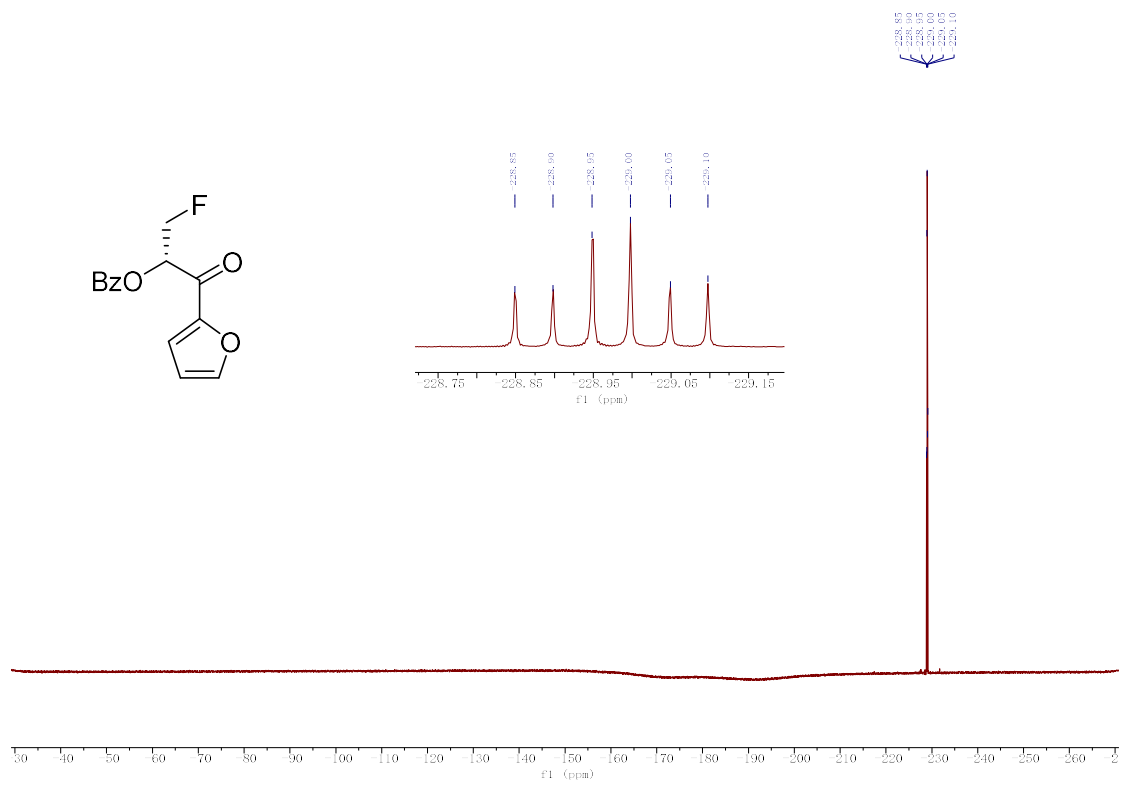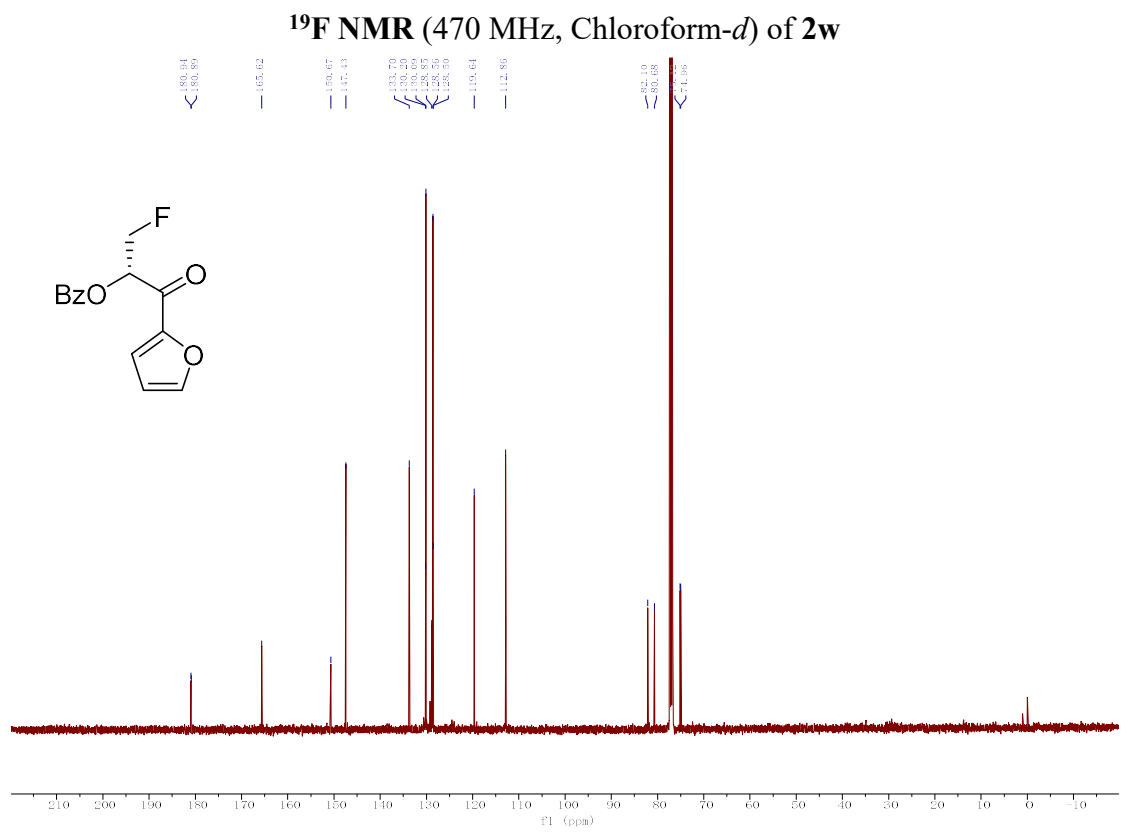

# $^1\text{H}$ , $^{13}\text{C}$ , and $^{19}\text{F}$ NMR spectra of **2x**

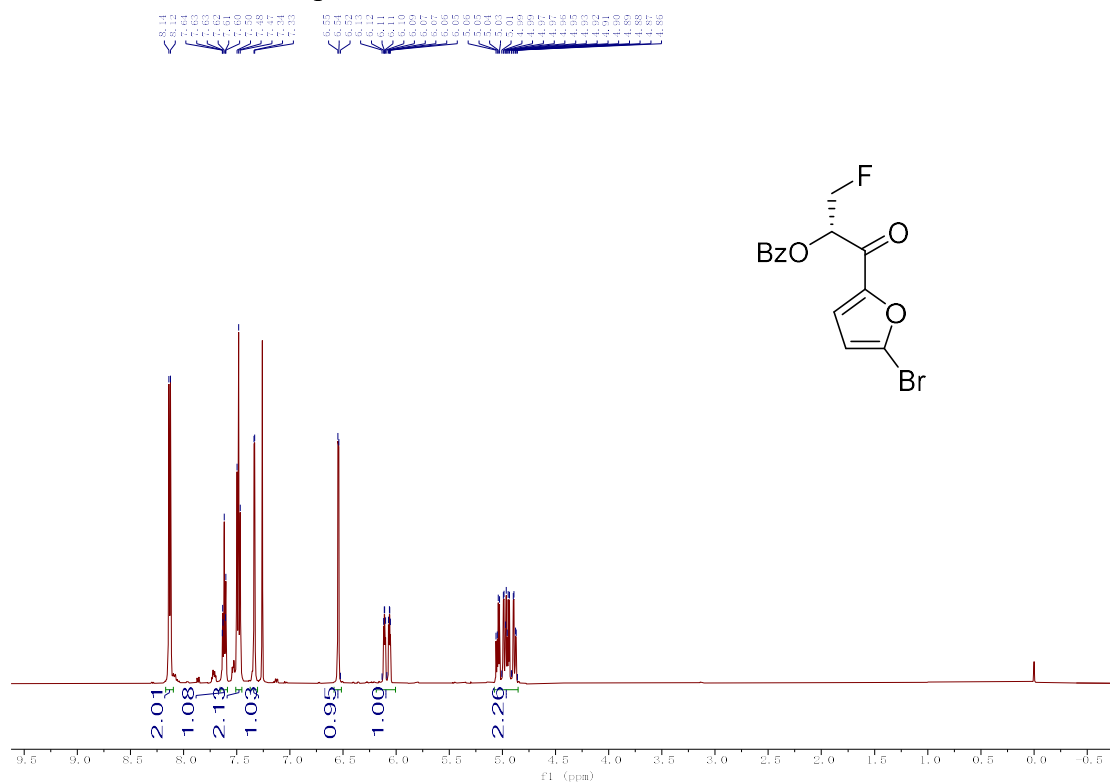

$^1\text{H}$  NMR (500 MHz, Chloroform-*d*) of **2x**

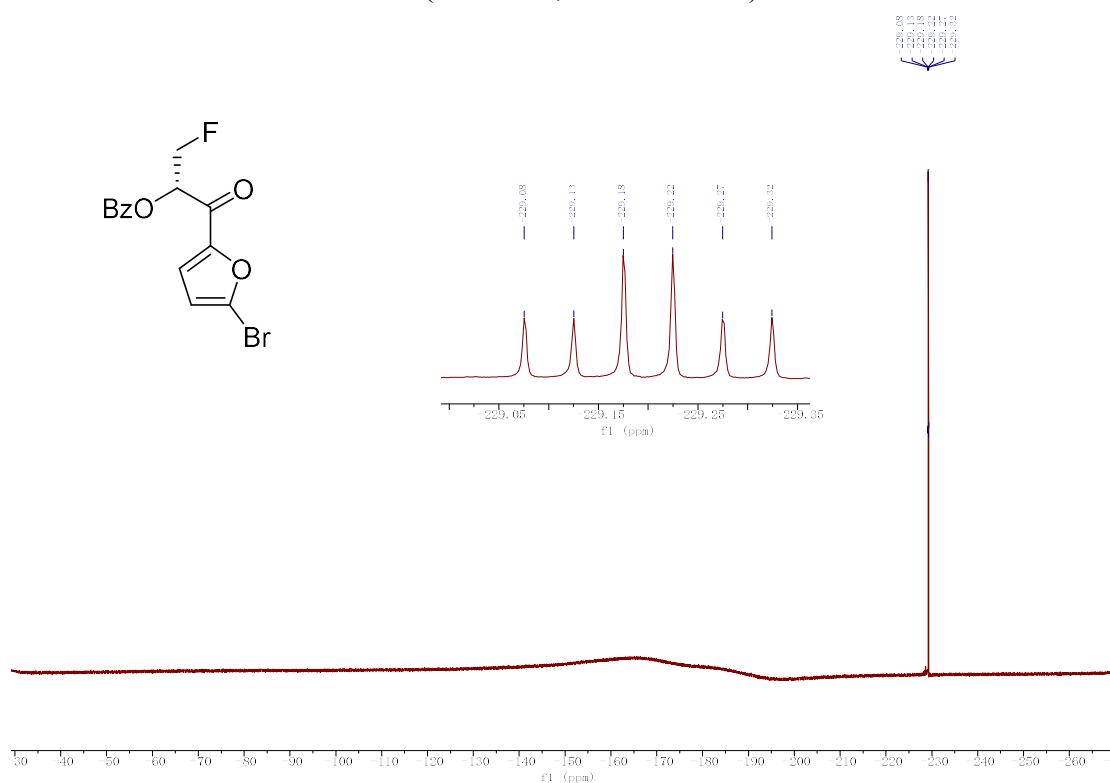

$^{19}\text{F}$  NMR (470 MHz, Chloroform-*d*) of **2x**

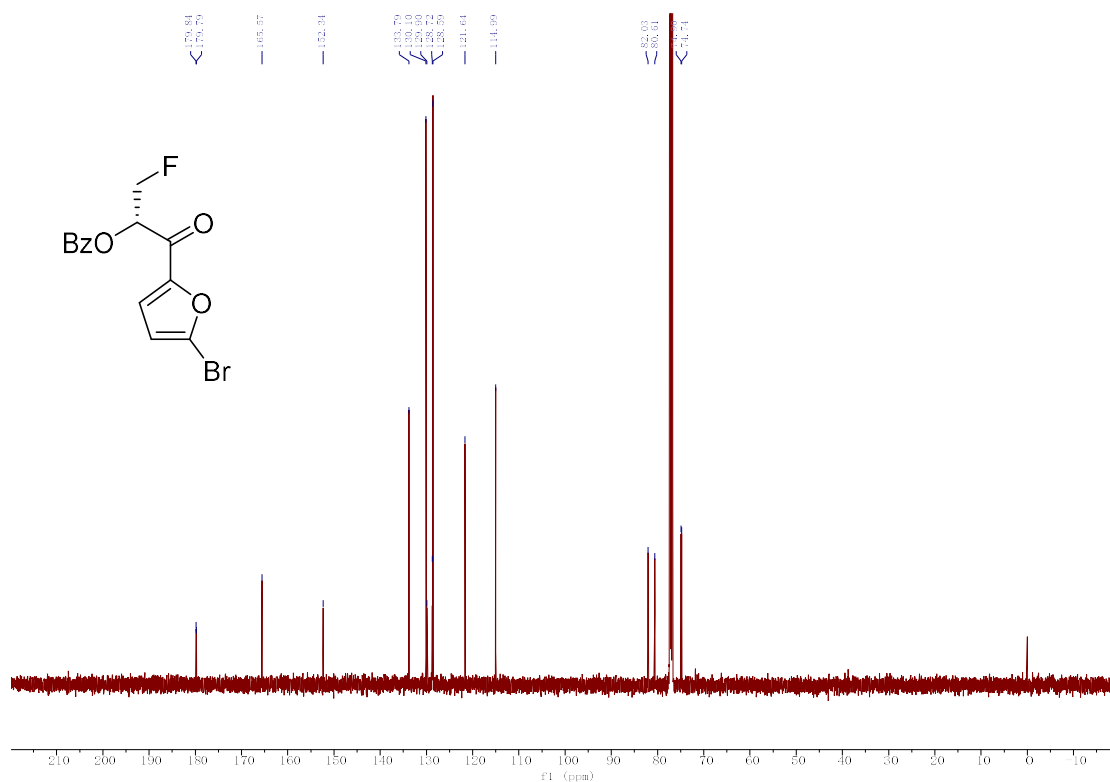

$^{13}\text{C}$  NMR (126 MHz, Chloroform-*d*) of **2x**  
 $^1\text{H}$ ,  $^{13}\text{C}$ , and  $^{19}\text{F}$  NMR spectra of **2y**

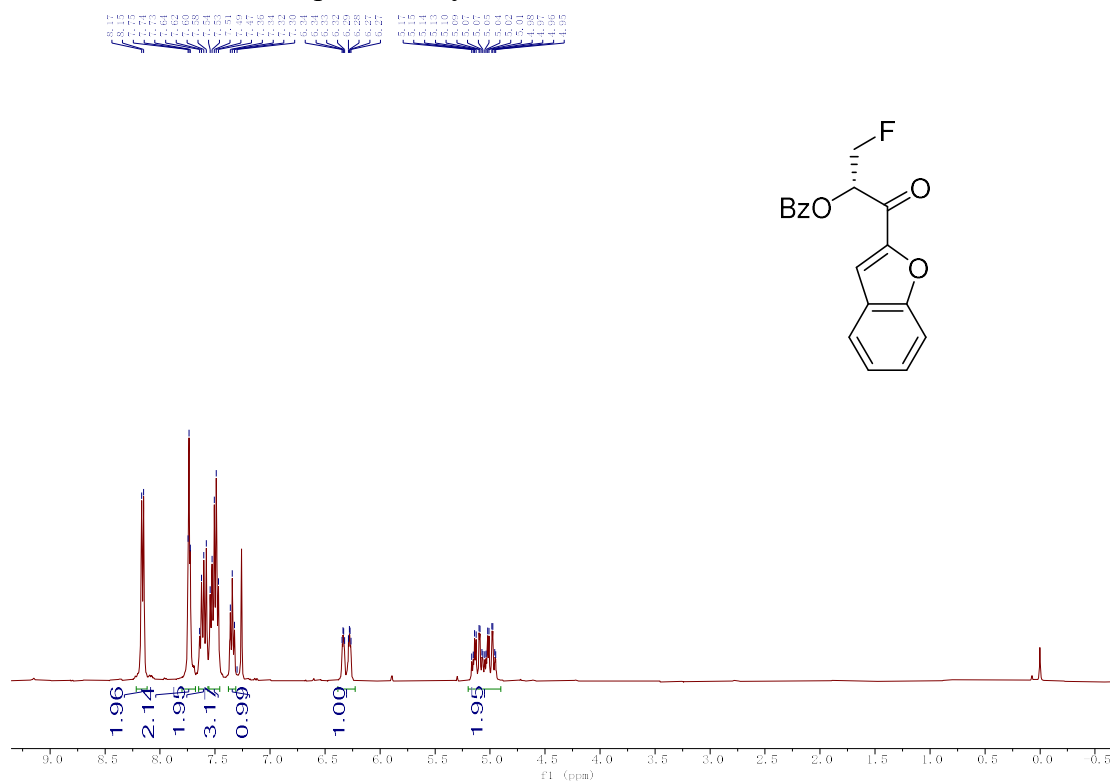

$^1\text{H}$  NMR (500 MHz, Chloroform-*d*) of **2y**

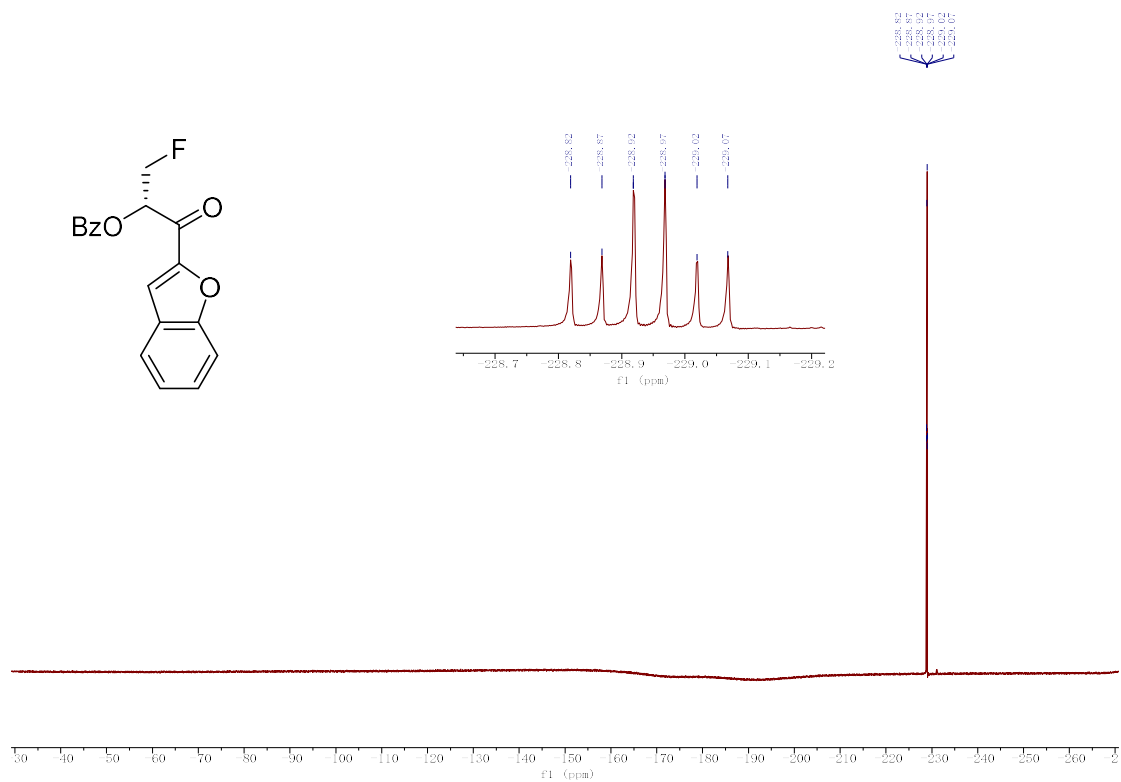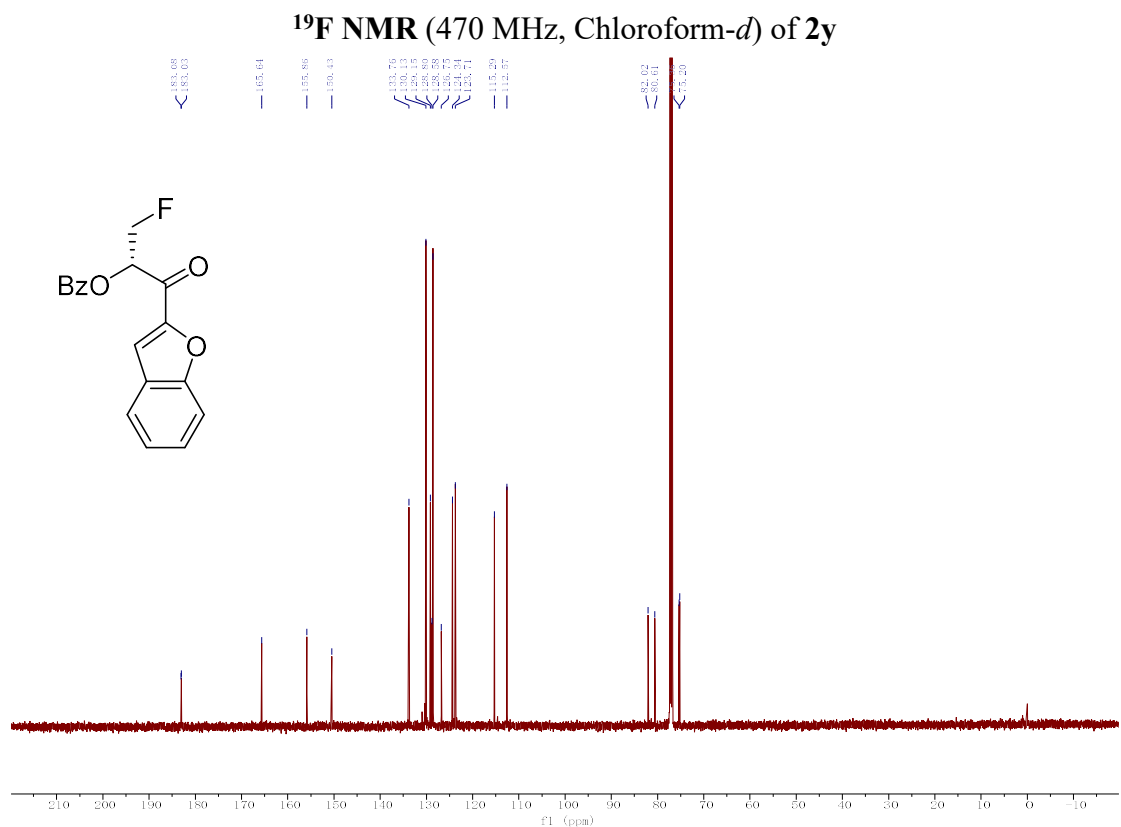

$^1\text{H}$ ,  $^{13}\text{C}$ , and  $^{19}\text{F}$  NMR spectra of **2z**

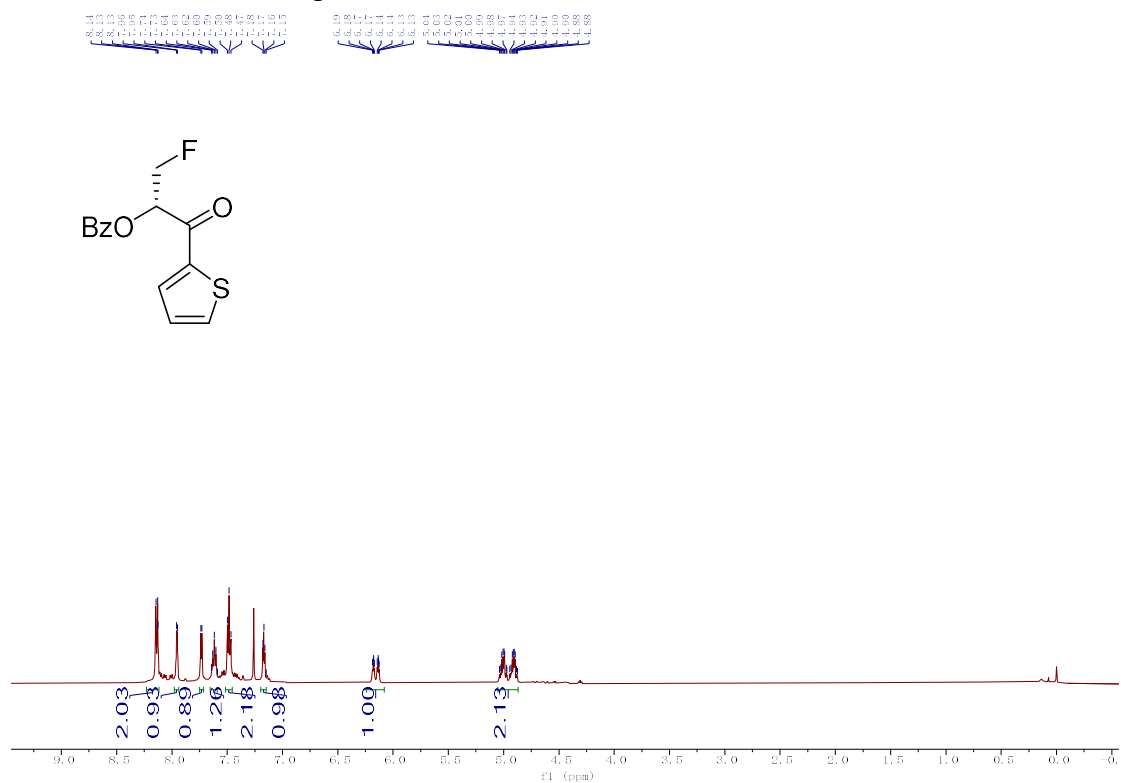

$^1\text{H}$  NMR (500 MHz, Chloroform-*d*) of **2z**

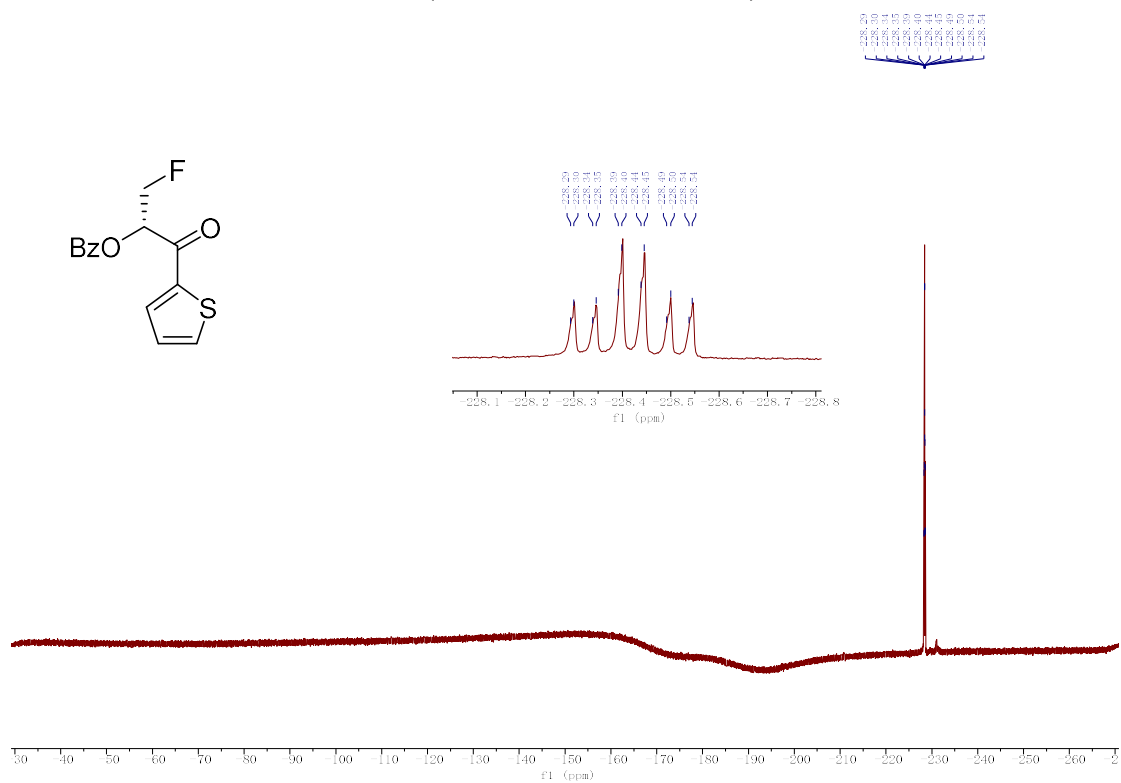

$^{19}\text{F}$  NMR (470 MHz, Chloroform-*d*) of **2z**

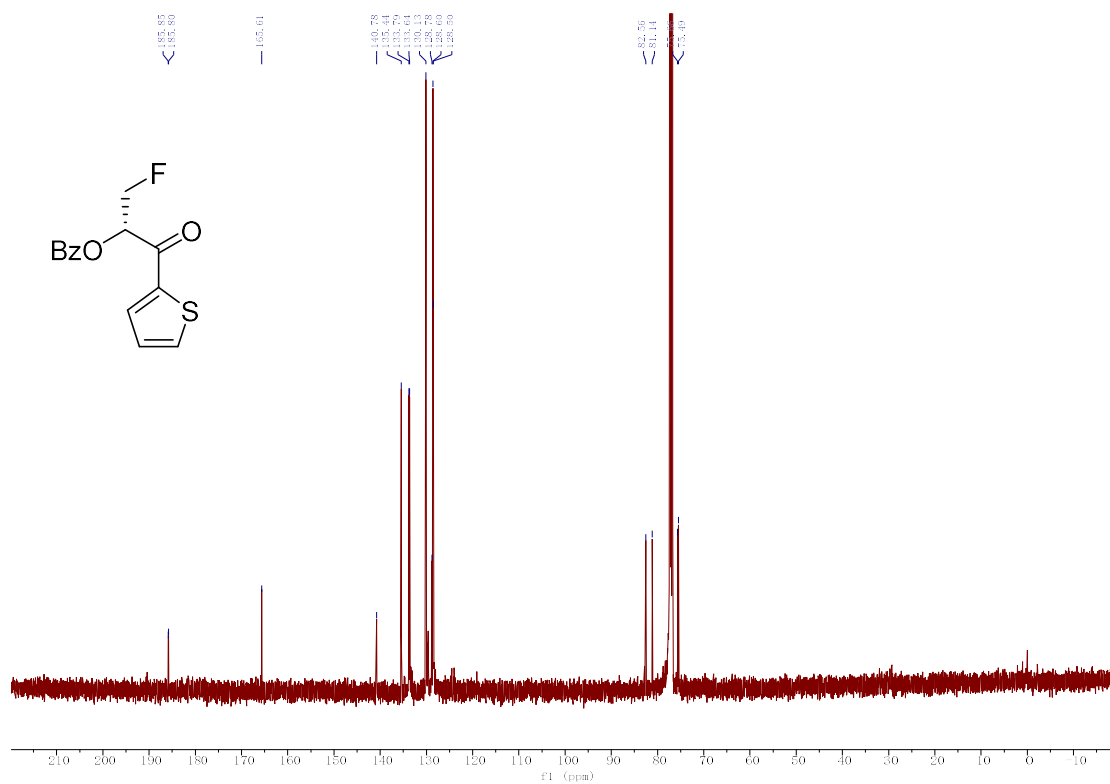

<sup>13</sup>C NMR (126 MHz, Chloroform-*d*) of **2z**

<sup>1</sup>H, <sup>13</sup>C, and <sup>19</sup>F NMR spectra of **2a'**

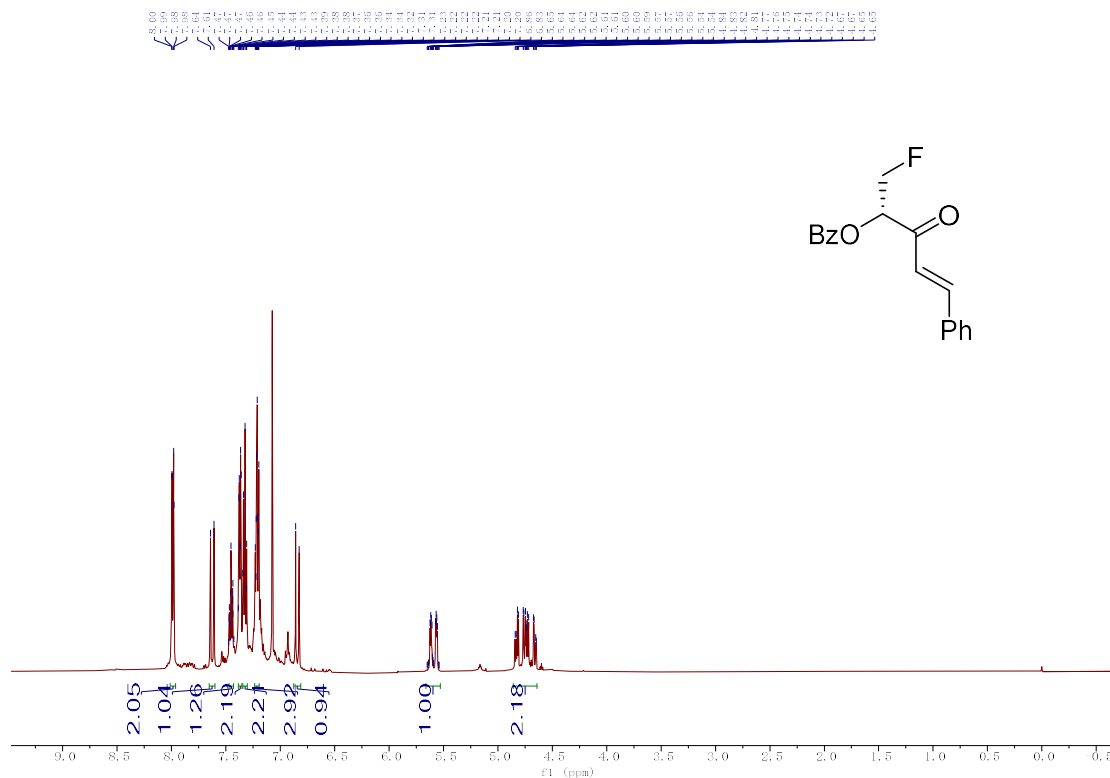

<sup>1</sup>H NMR (500 MHz, Chloroform-*d*) of **2a'**

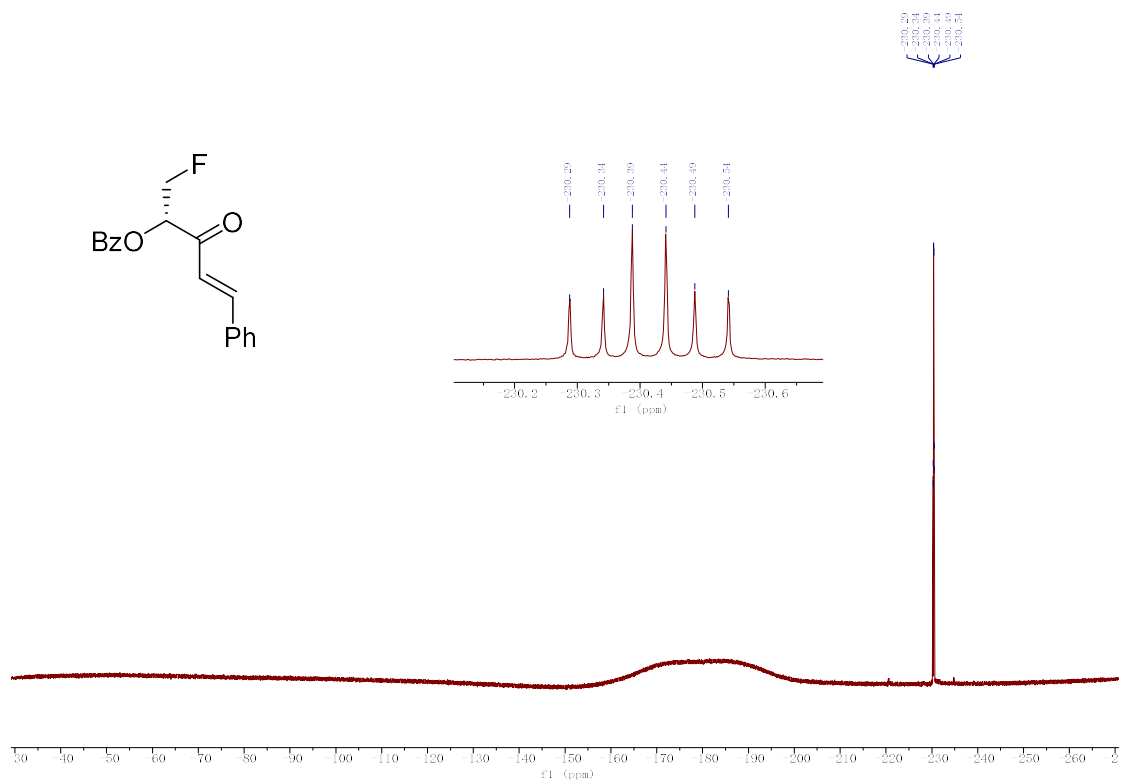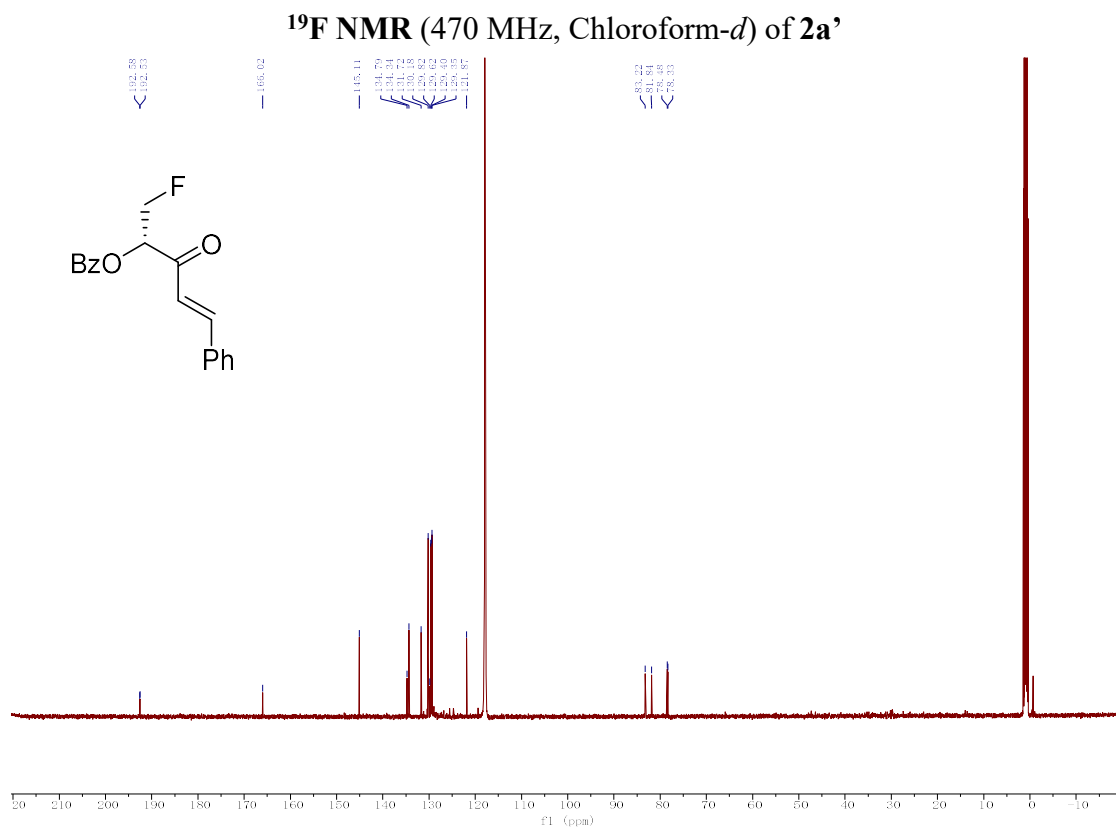

$^1\text{H}$ ,  $^{13}\text{C}$ , and  $^{19}\text{F}$  NMR spectra of **2b'**

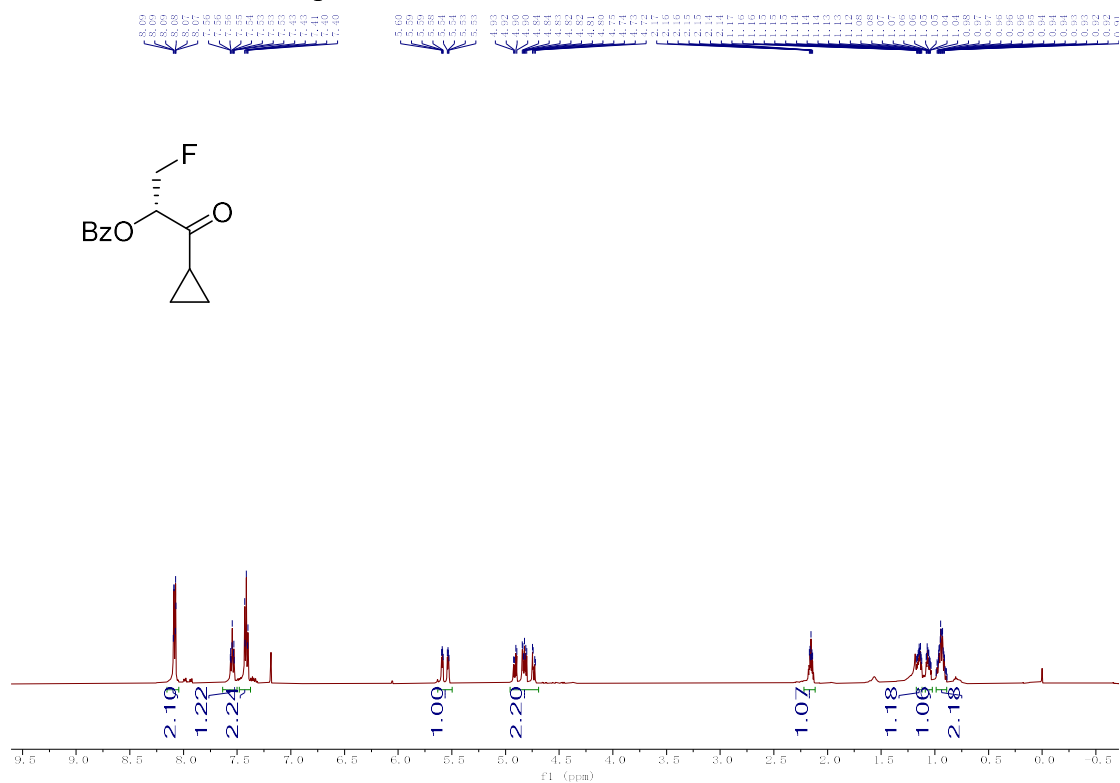

$^1\text{H}$  NMR (500 MHz, Chloroform-*d*) of **2b'**

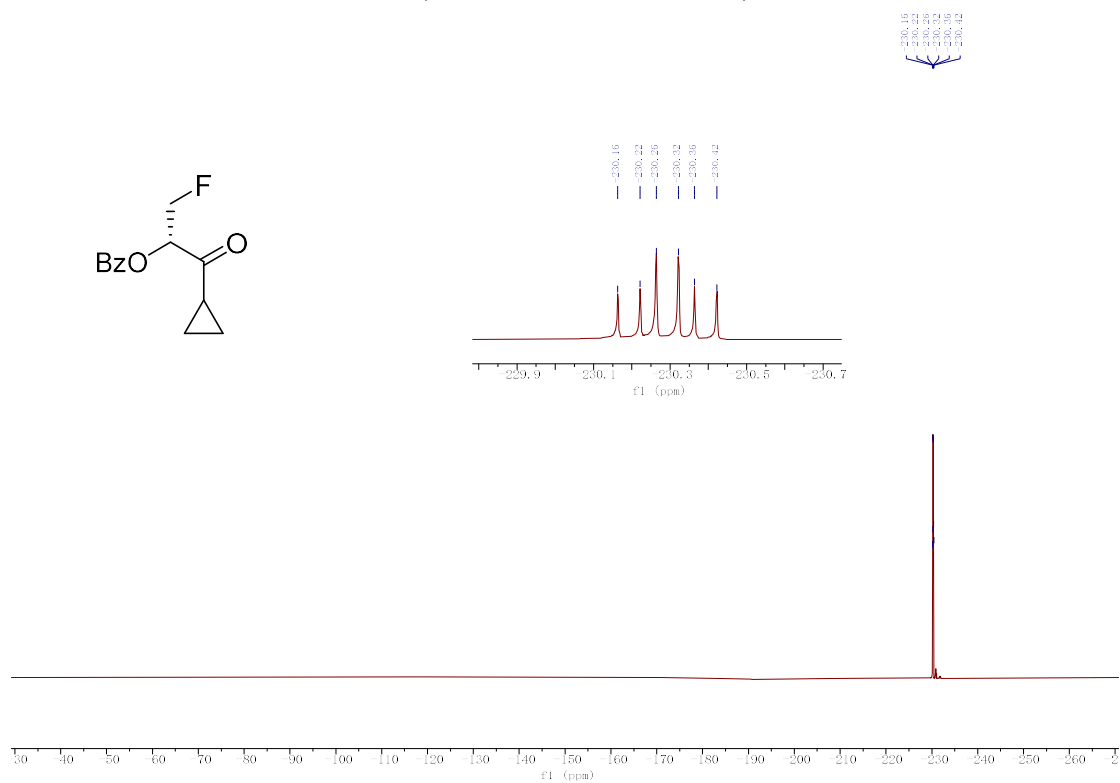

$^{19}\text{F}$  NMR (470 MHz, Chloroform-*d*) of **2b'**



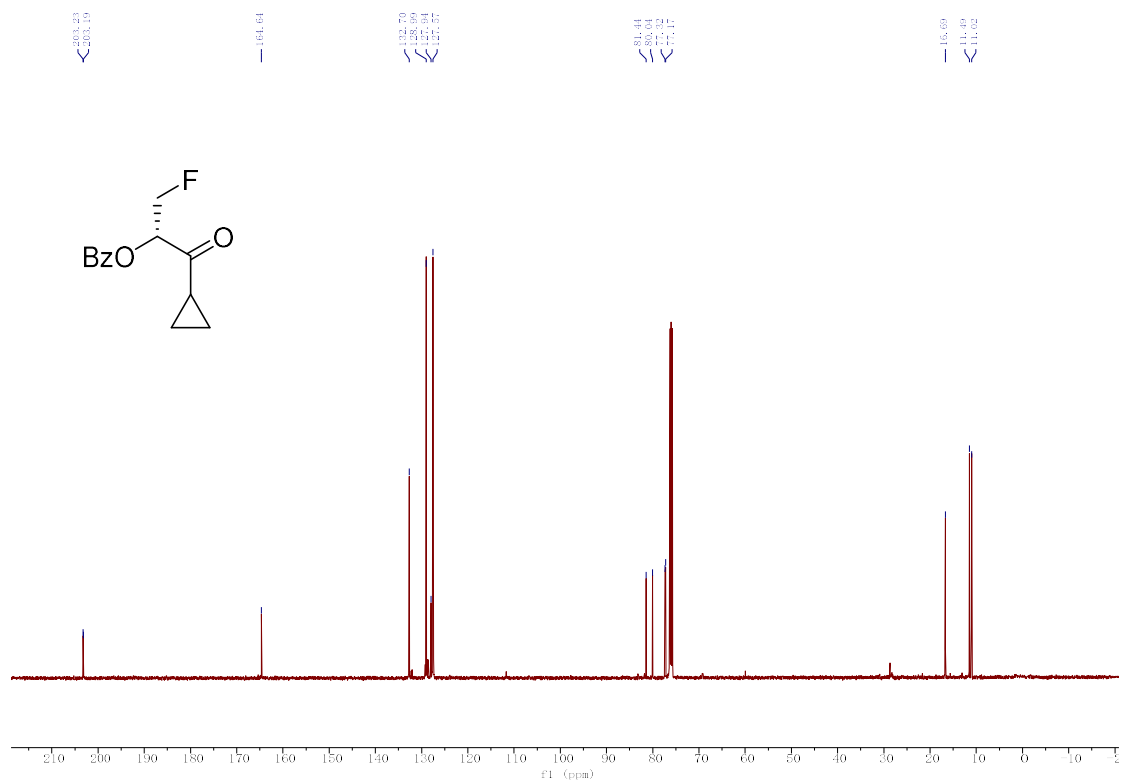

<sup>13</sup>C NMR (126 MHz, Chloroform-*d*) of **2b'**

<sup>1</sup>H, <sup>13</sup>C, and <sup>19</sup>F NMR spectra of **2c'**

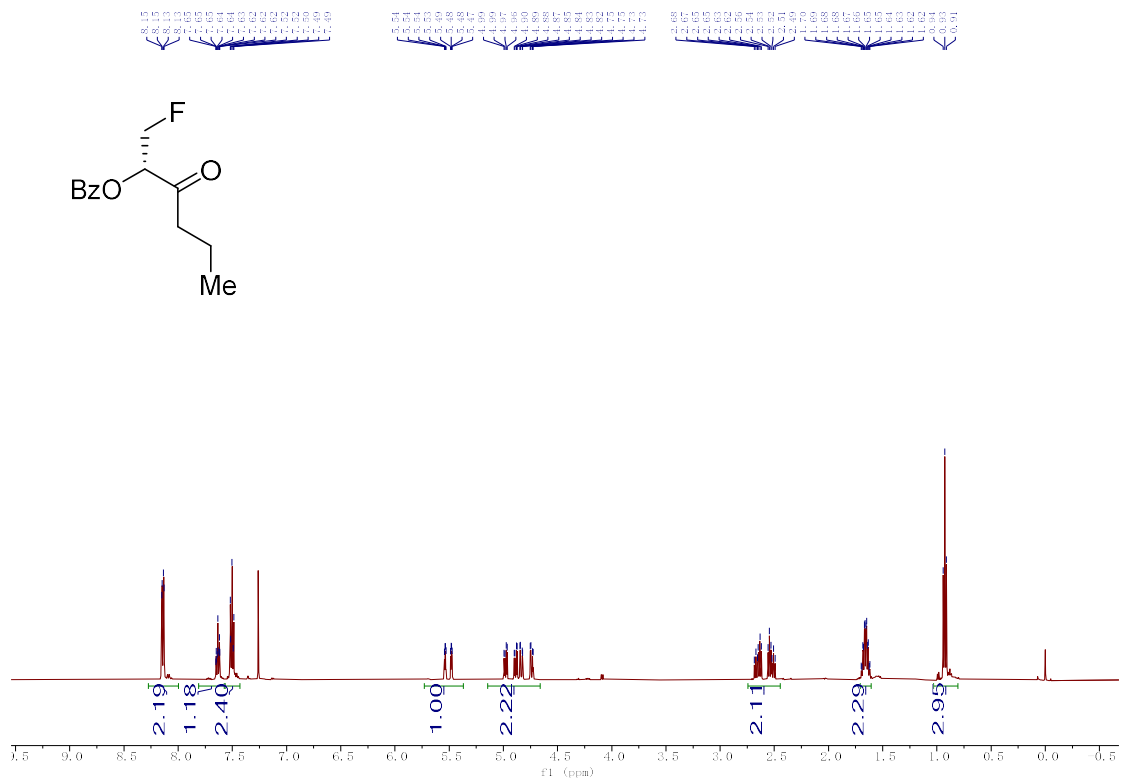

<sup>1</sup>H NMR (500 MHz, Chloroform-*d*) of **2c'**

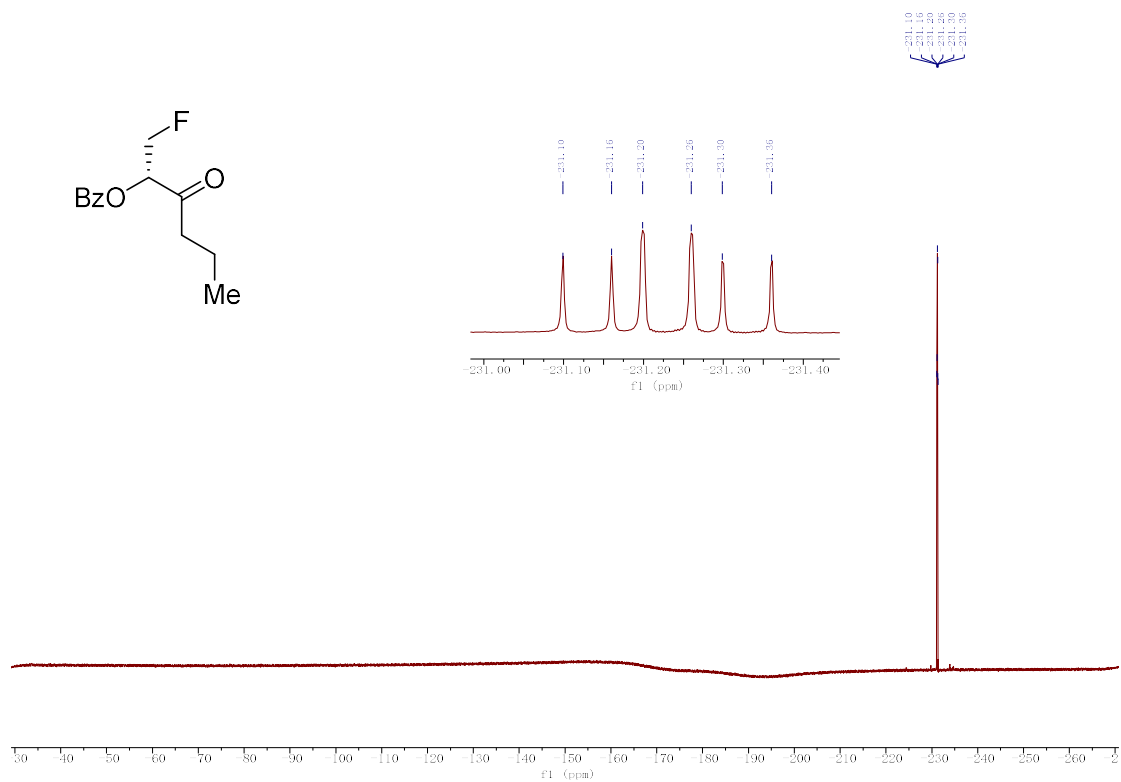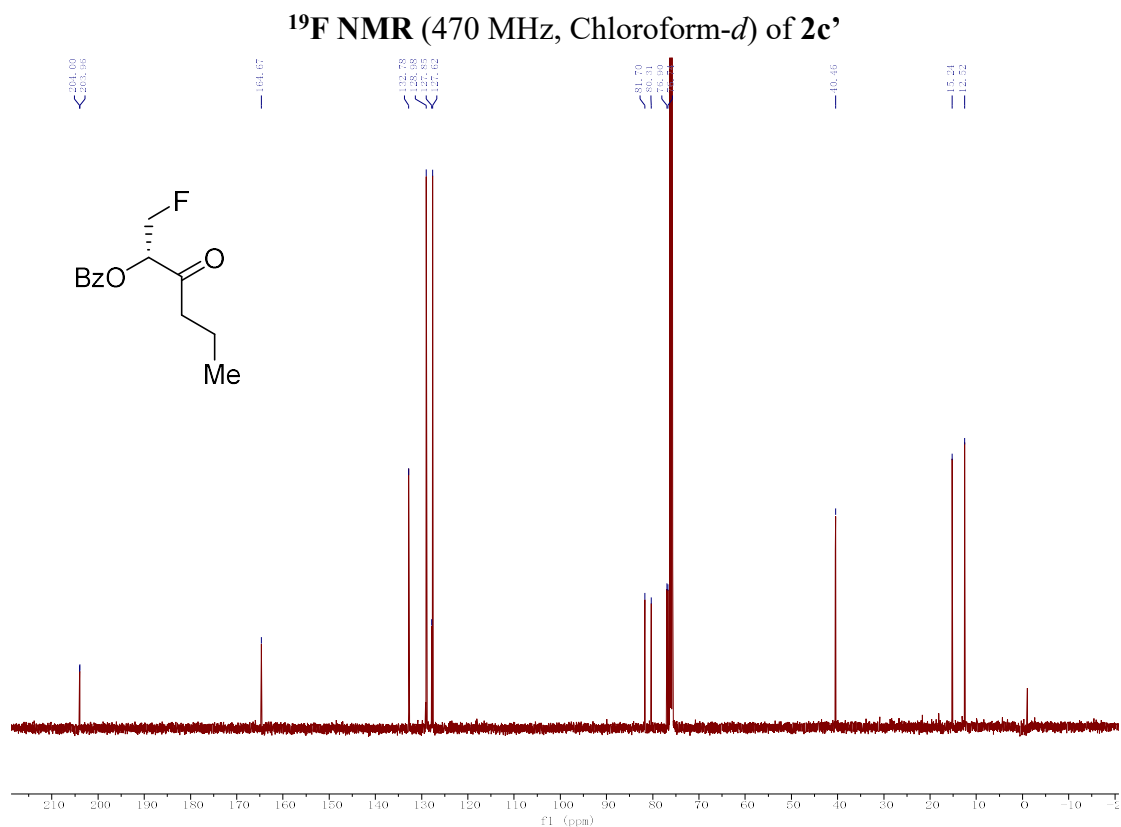

$^1\text{H}$ ,  $^{13}\text{C}$ , and  $^{19}\text{F}$  NMR spectra of **2d'**

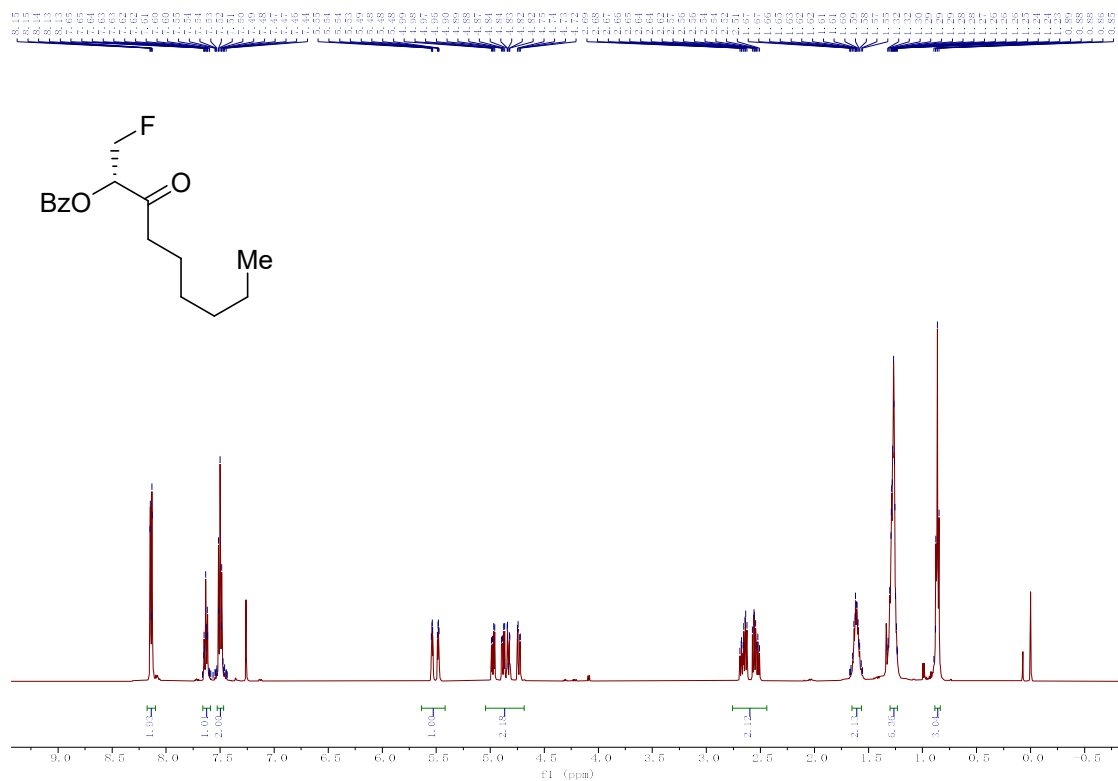

$^1\text{H}$  NMR (500 MHz, Chloroform-*d*) of **2d'**

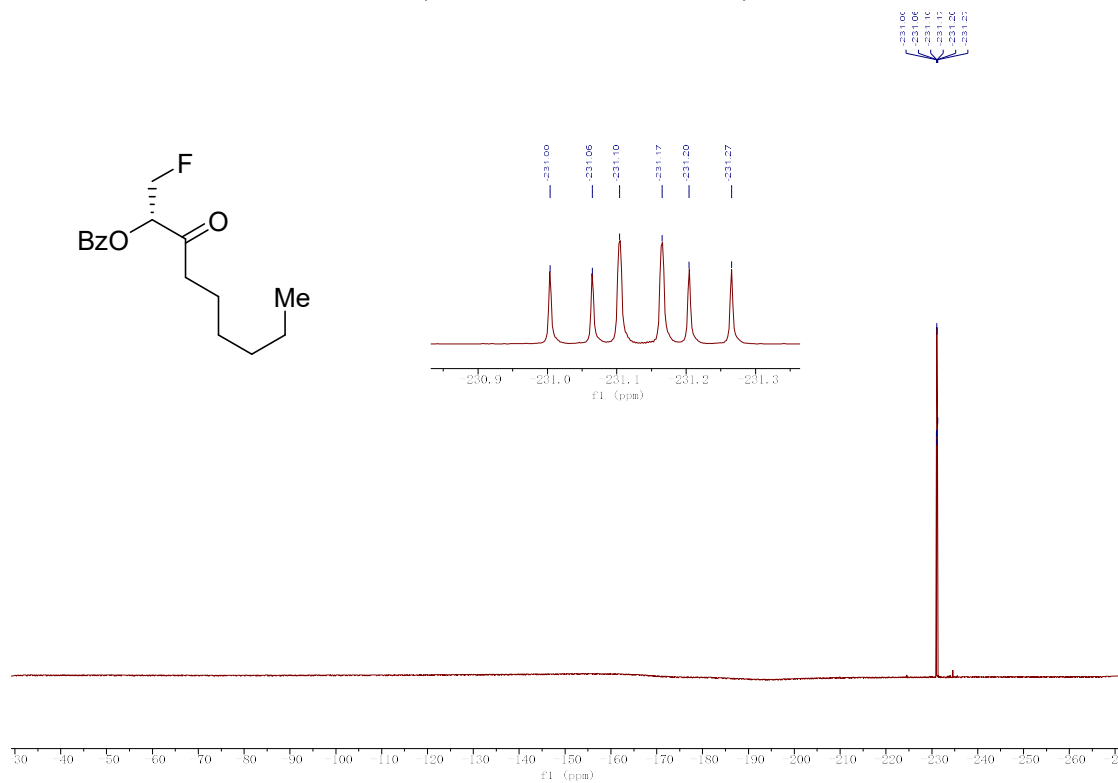

$^{19}\text{F}$  NMR (470 MHz, Chloroform-*d*) of **2d'**

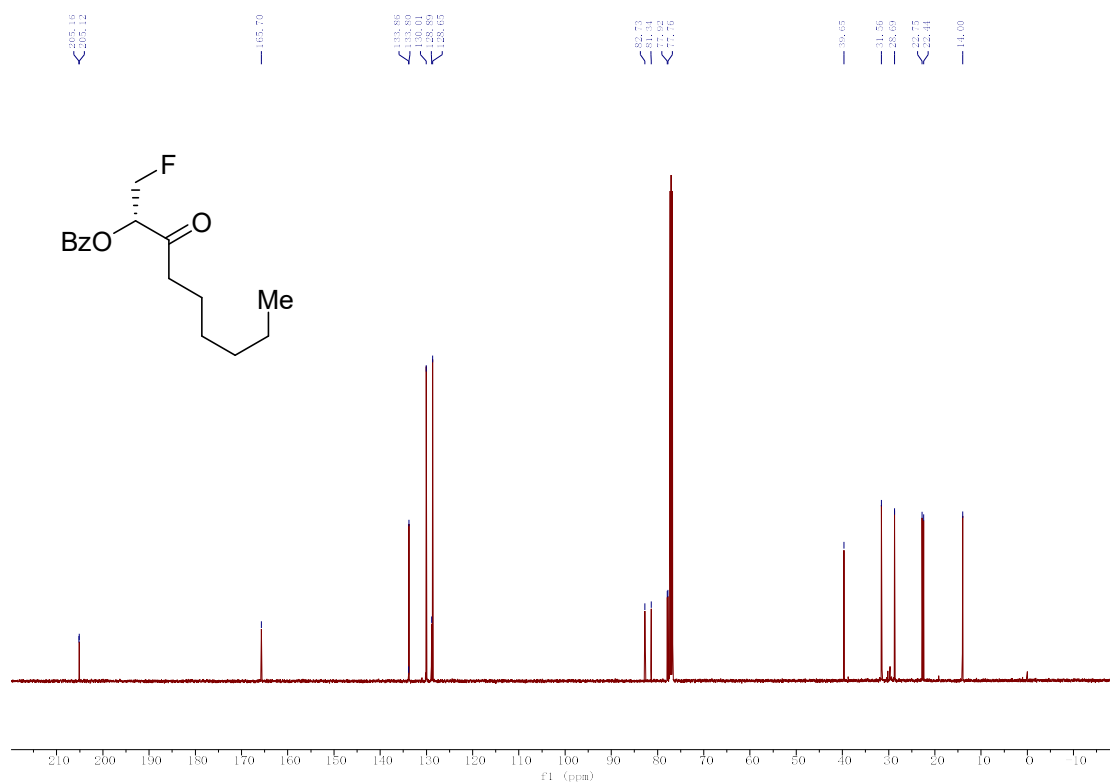

<sup>13</sup>C NMR (126 MHz, Chloroform-*d*) of **2d'**

<sup>1</sup>H, <sup>13</sup>C, and <sup>19</sup>F NMR spectra of **2e'**

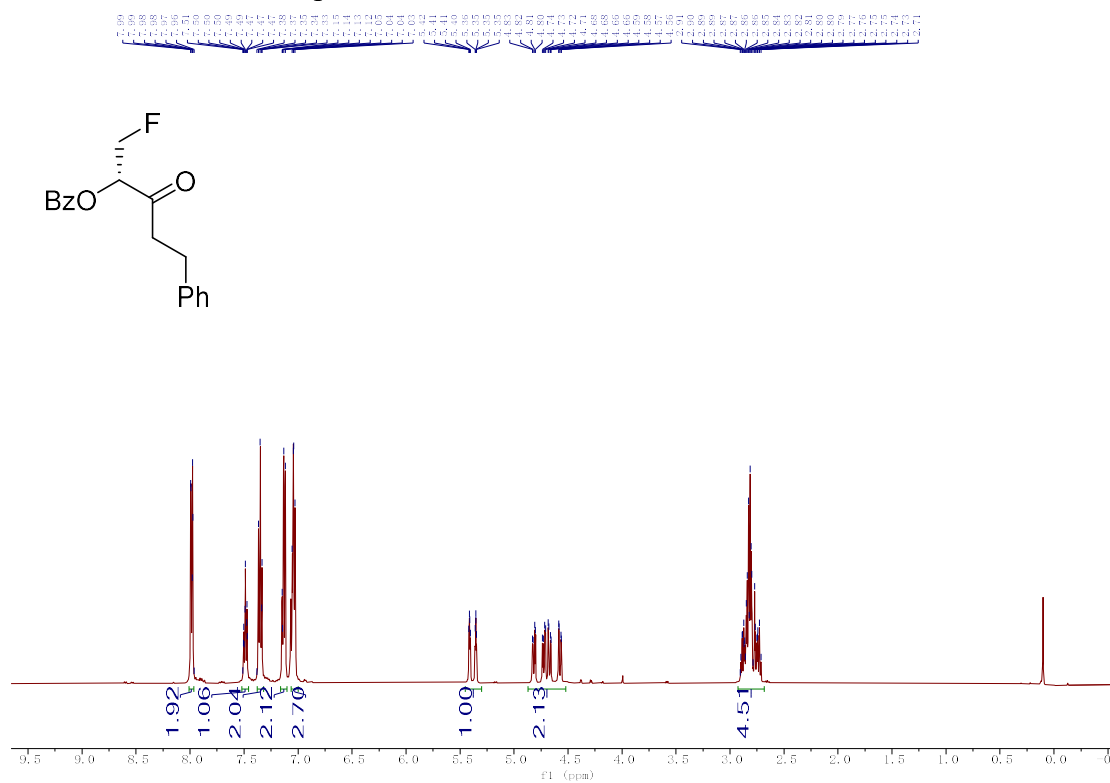

<sup>1</sup>H NMR (500 MHz, Chloroform-*d*) of **2e'**

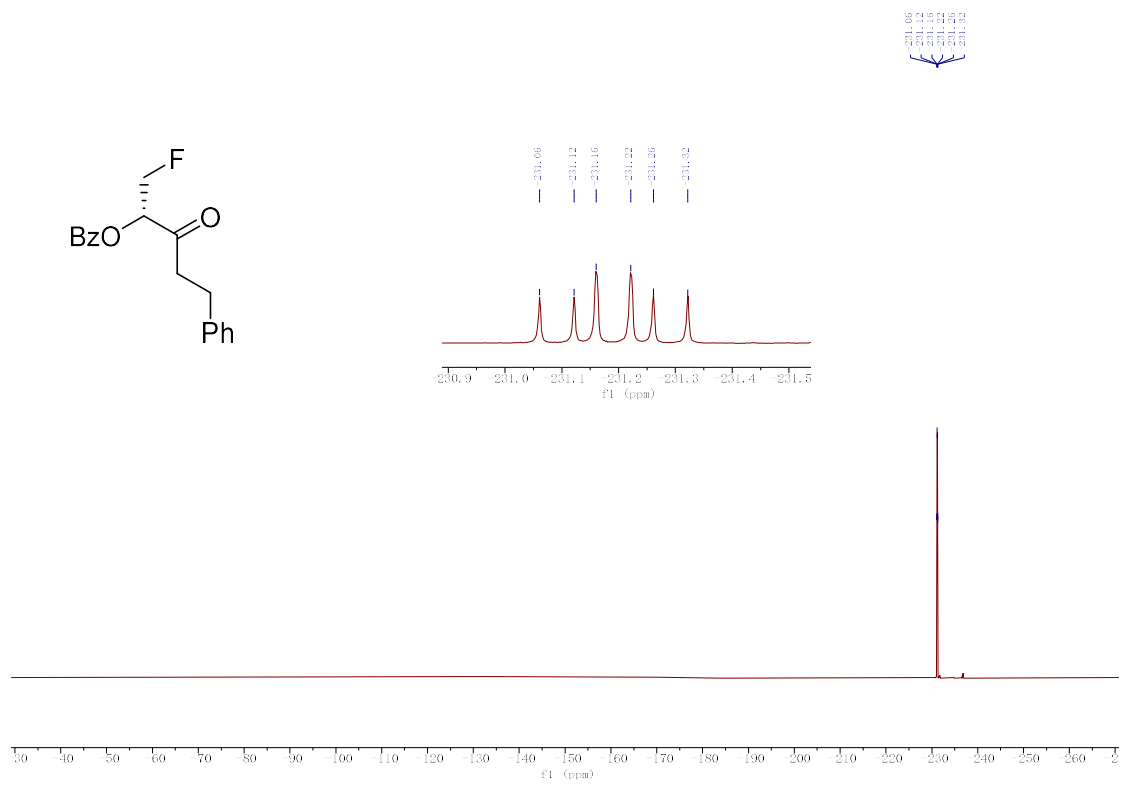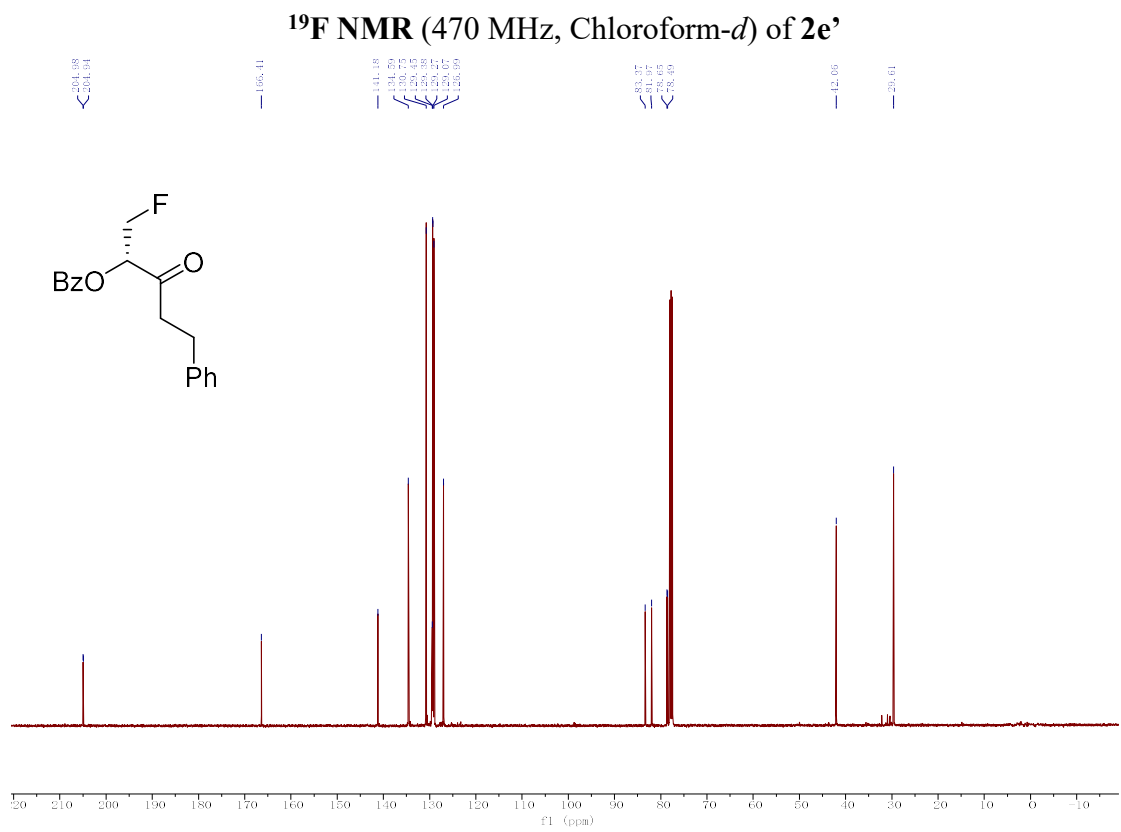

# $^1\text{H}$ , $^{13}\text{C}$ , and $^{19}\text{F}$ NMR spectra of **2f**

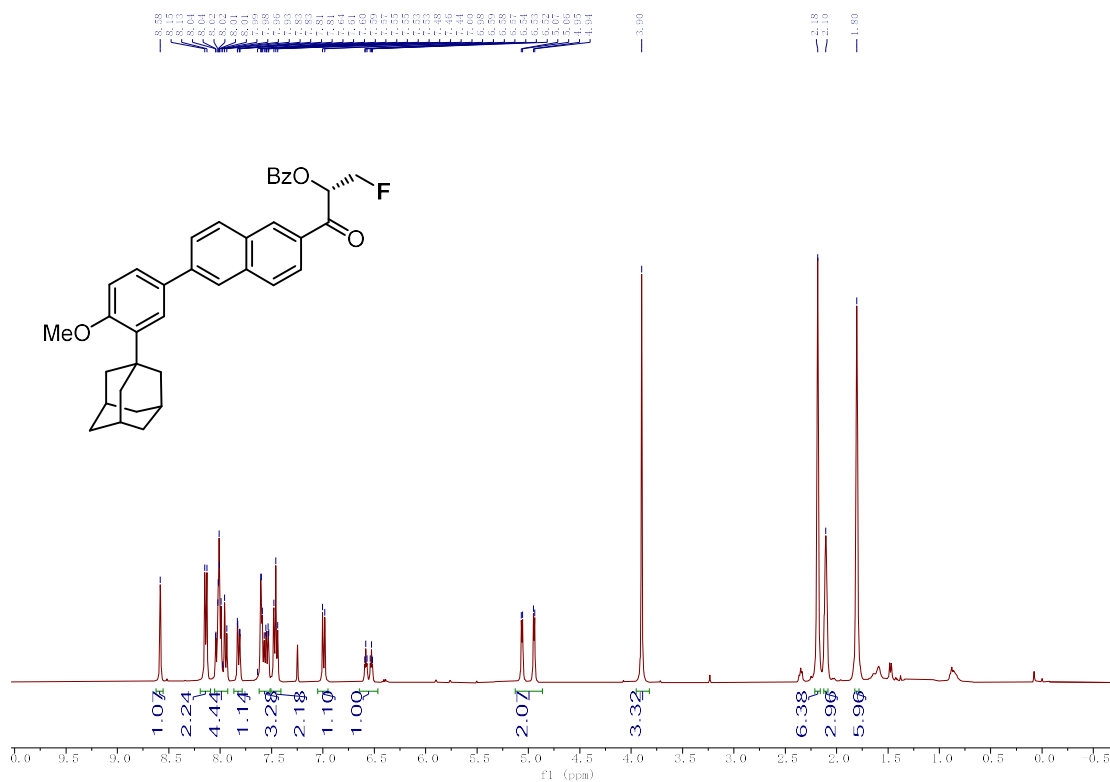

$^1\text{H}$  NMR (400 MHz, Chloroform-*d*) of **2f**

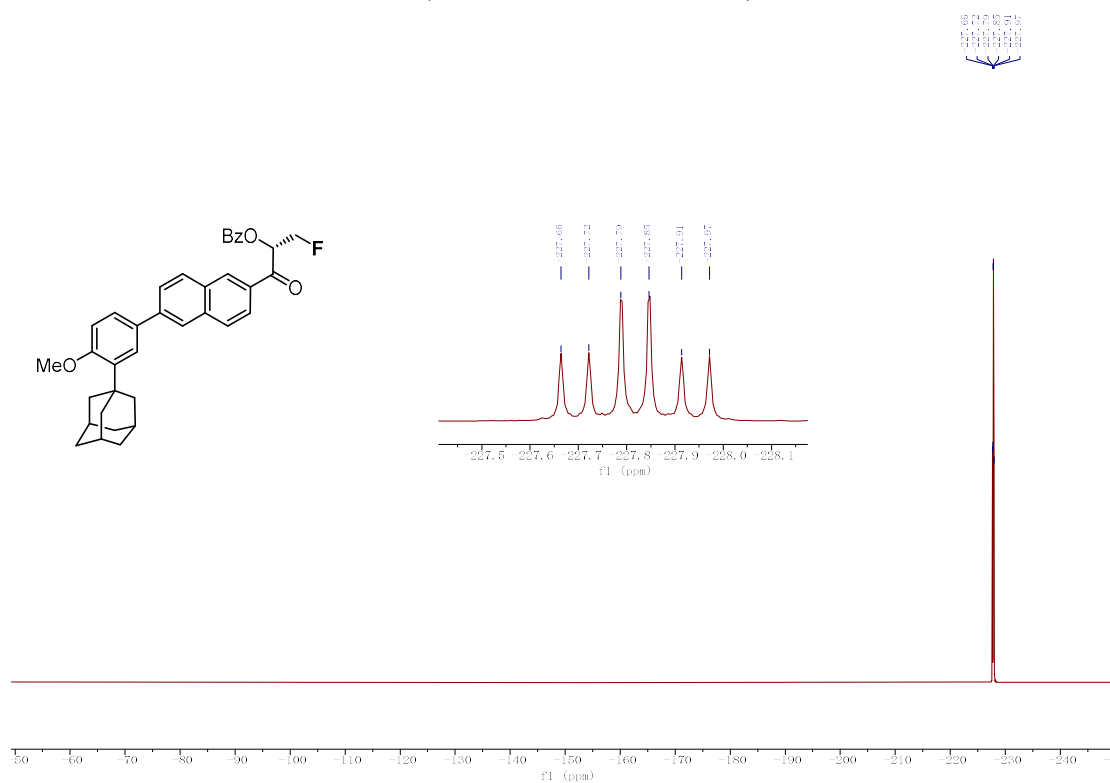

$^{19}\text{F}$  NMR (376 MHz, Chloroform-*d*) of **2f**

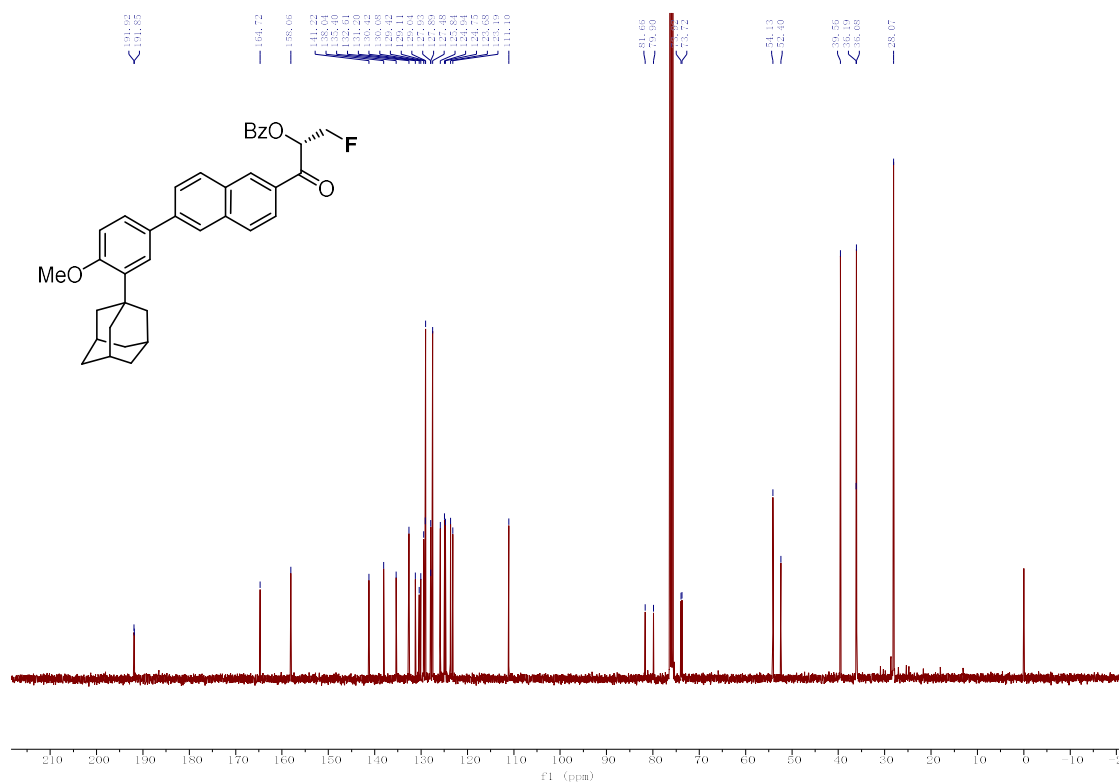

<sup>13</sup>C NMR (101 MHz, Chloroform-*d*) of **2f**  
<sup>1</sup>H, <sup>13</sup>C, and <sup>19</sup>F NMR spectra of **3**

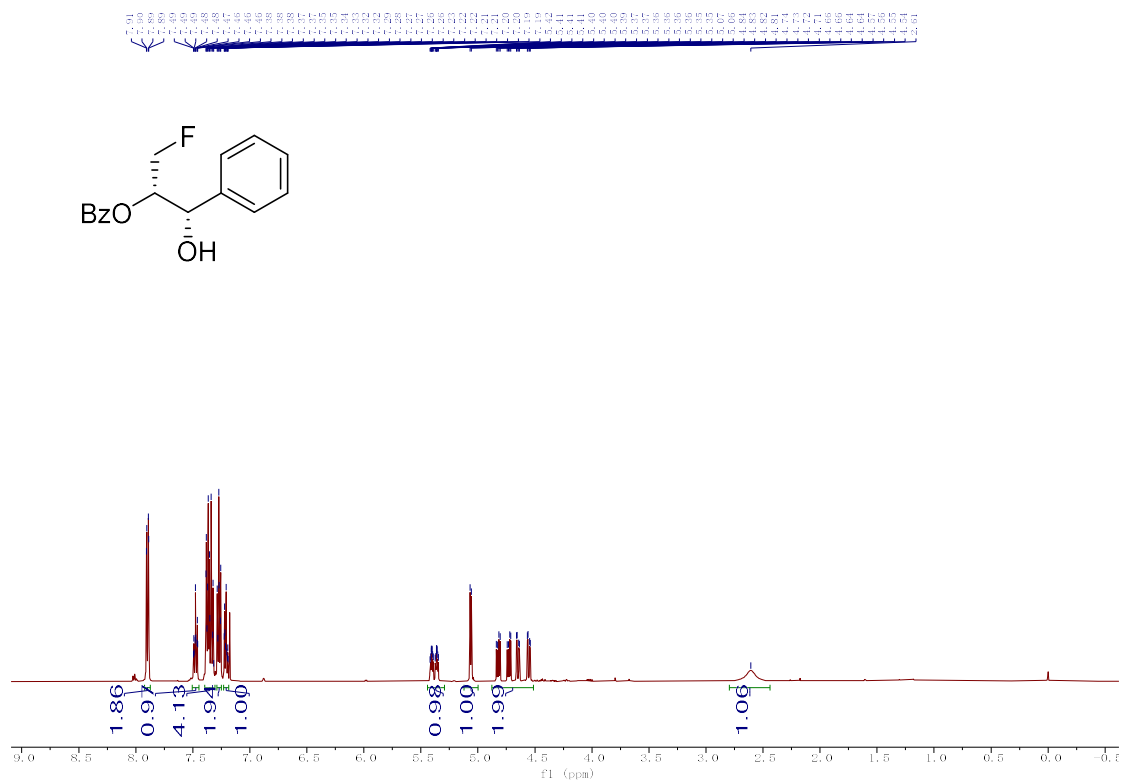

<sup>1</sup>H NMR (500 MHz, Chloroform-*d*) of **3**

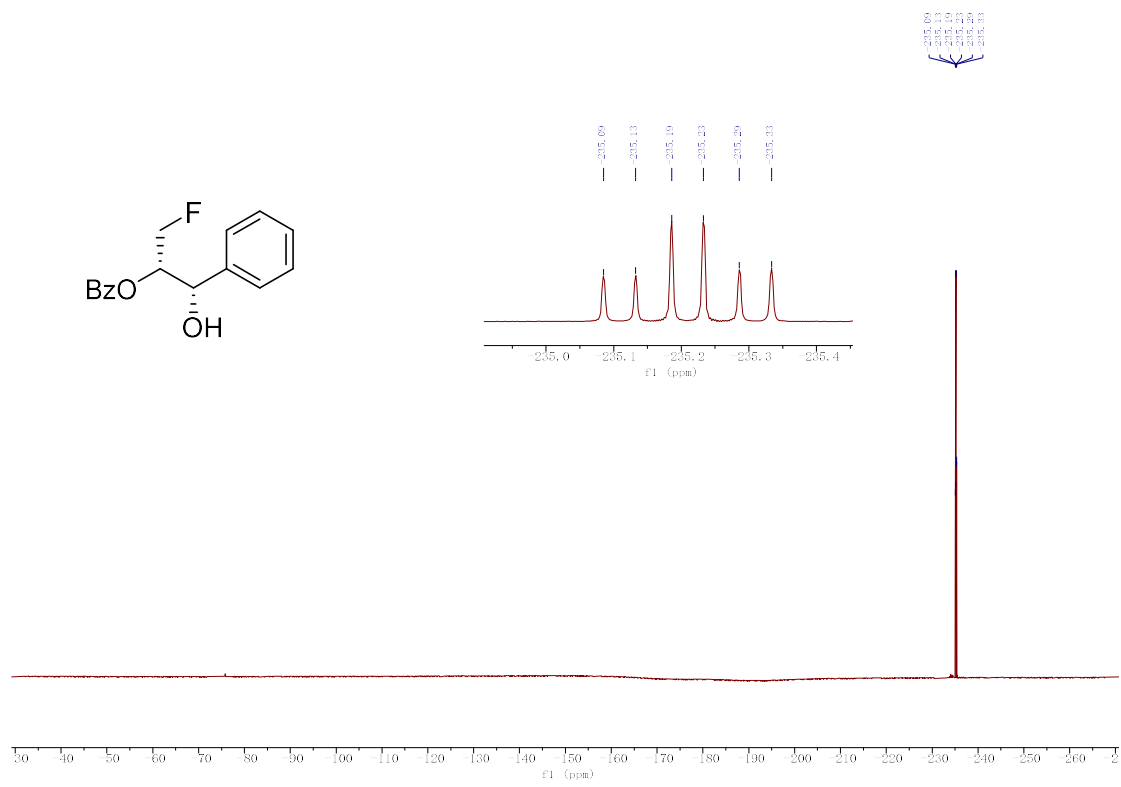

$^{19}\text{F}$  NMR (470 MHz, Chloroform- $d$ ) of **3**

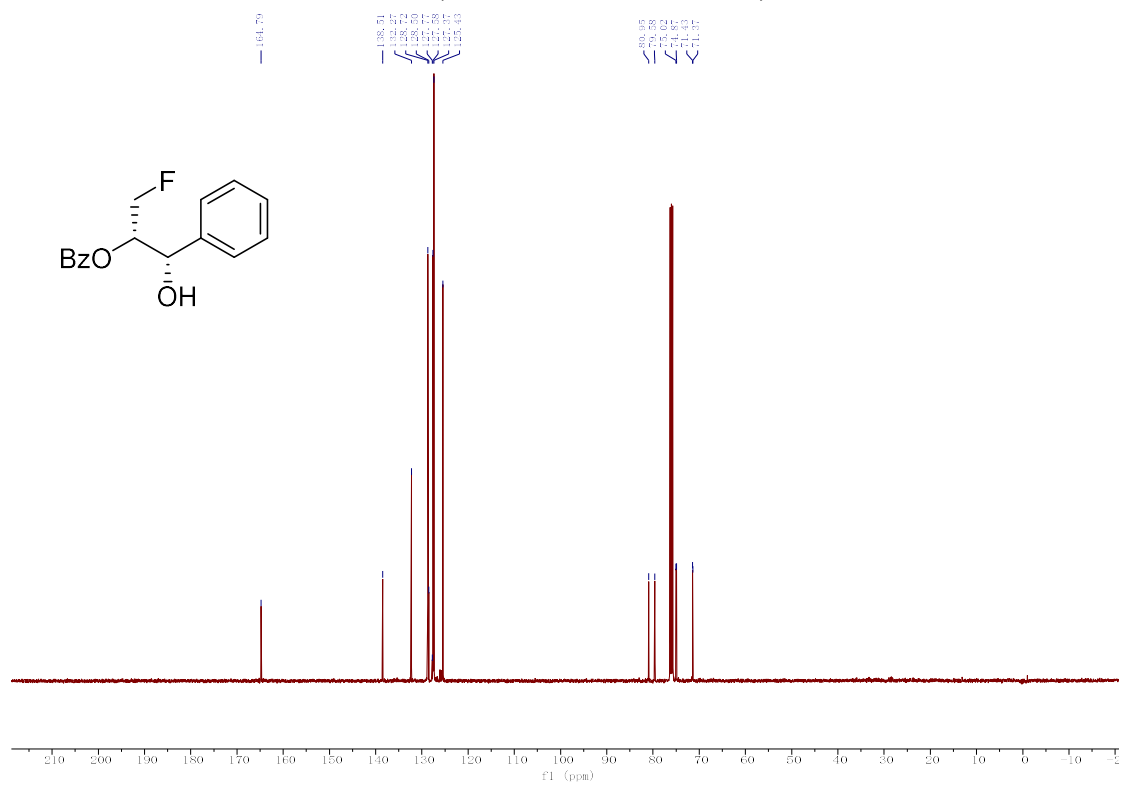

$^{13}\text{C}$  NMR (126 MHz, Chloroform- $d$ ) of **3**



# $^1\text{H}$ , $^{13}\text{C}$ , and $^{19}\text{F}$ NMR spectra of 4

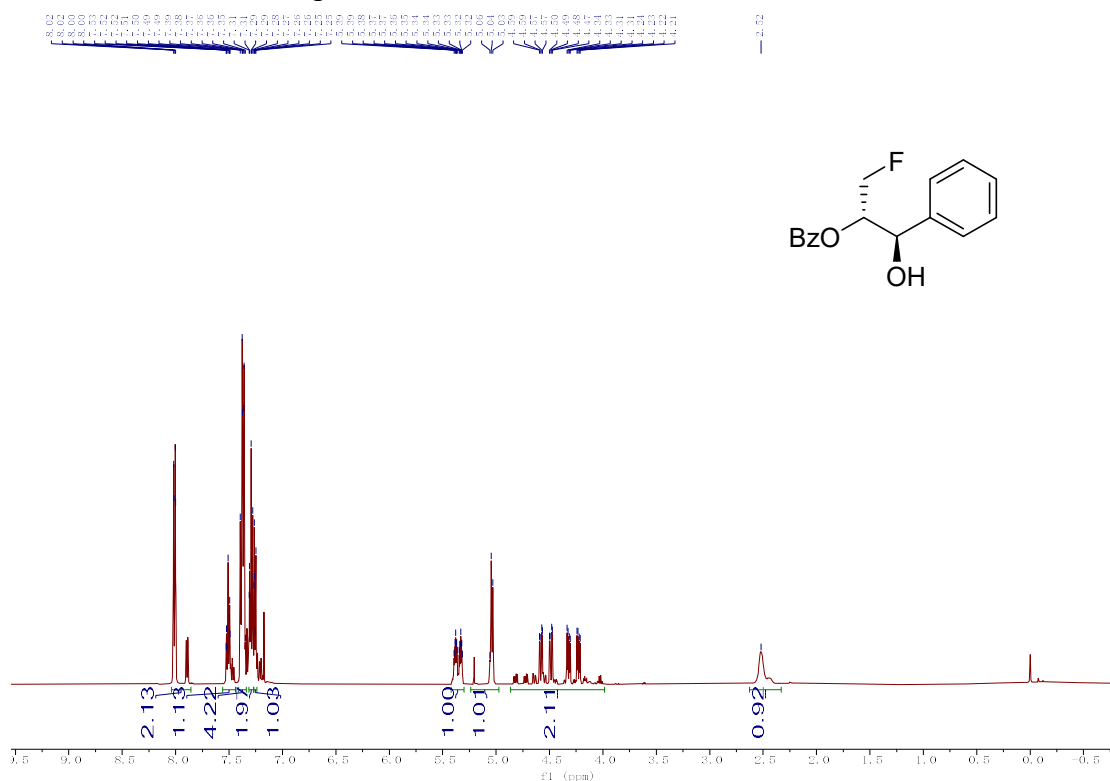

$^1\text{H}$  NMR (500 MHz, Chloroform- $d$ ) of 4

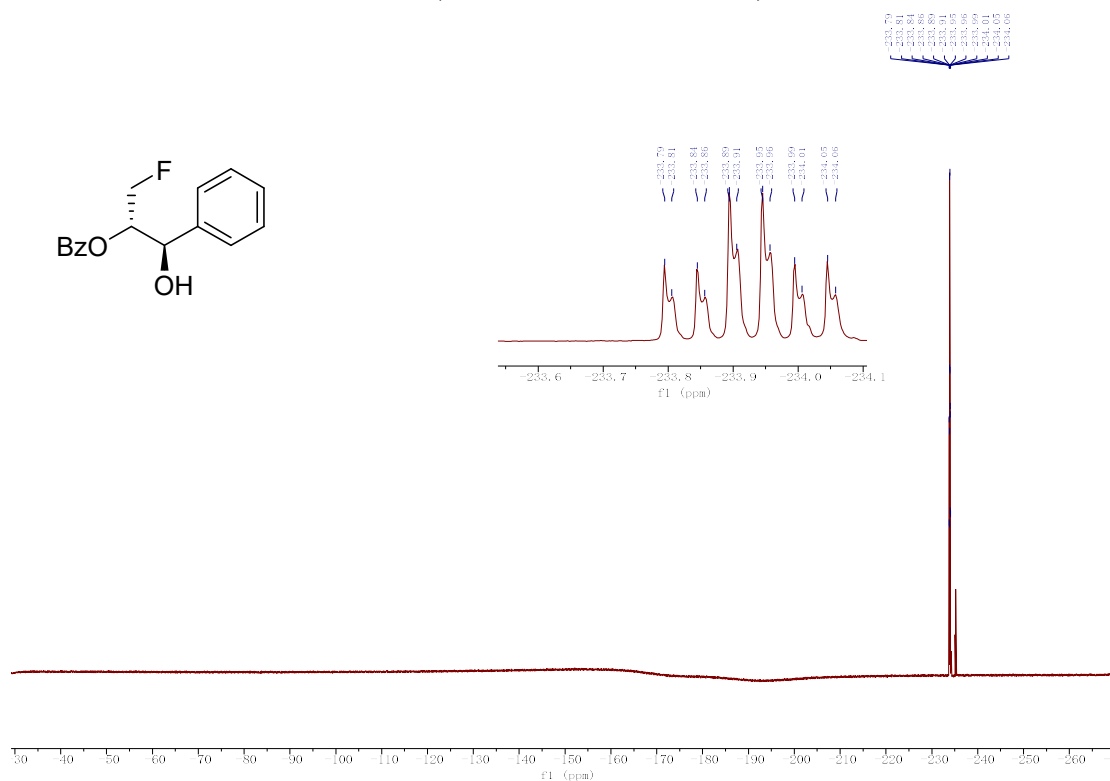

$^{19}\text{F}$  NMR (470 MHz, Chloroform- $d$ ) of 4



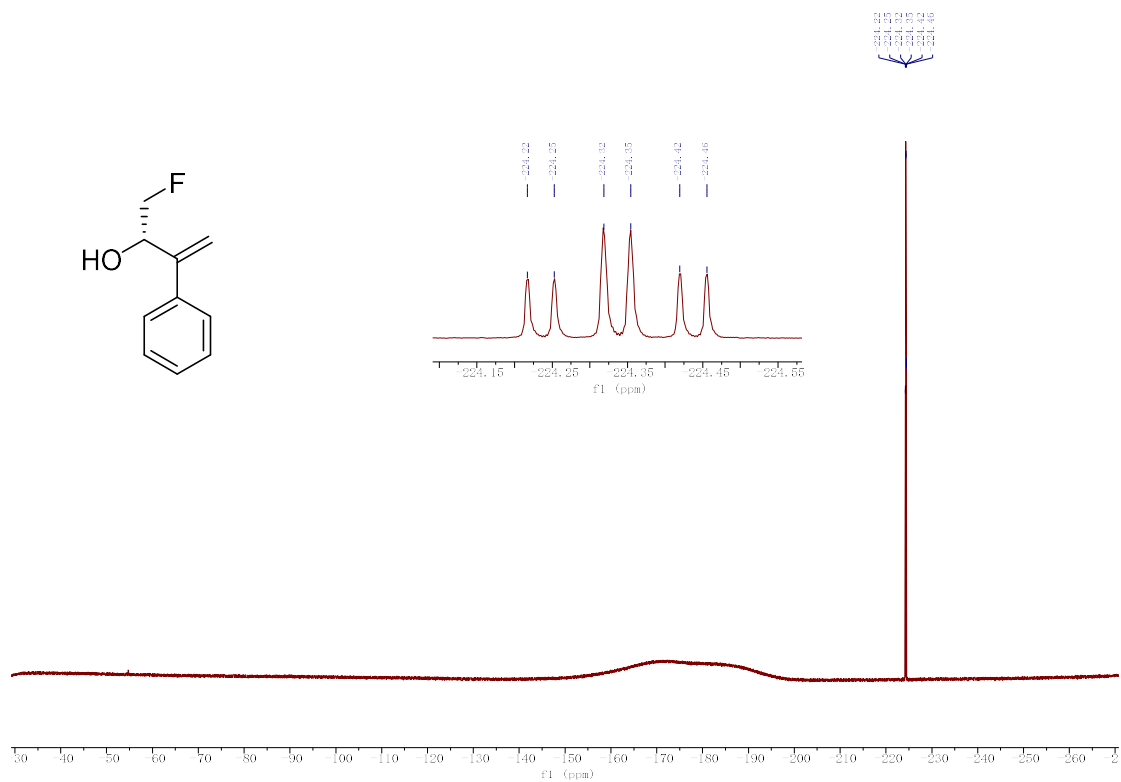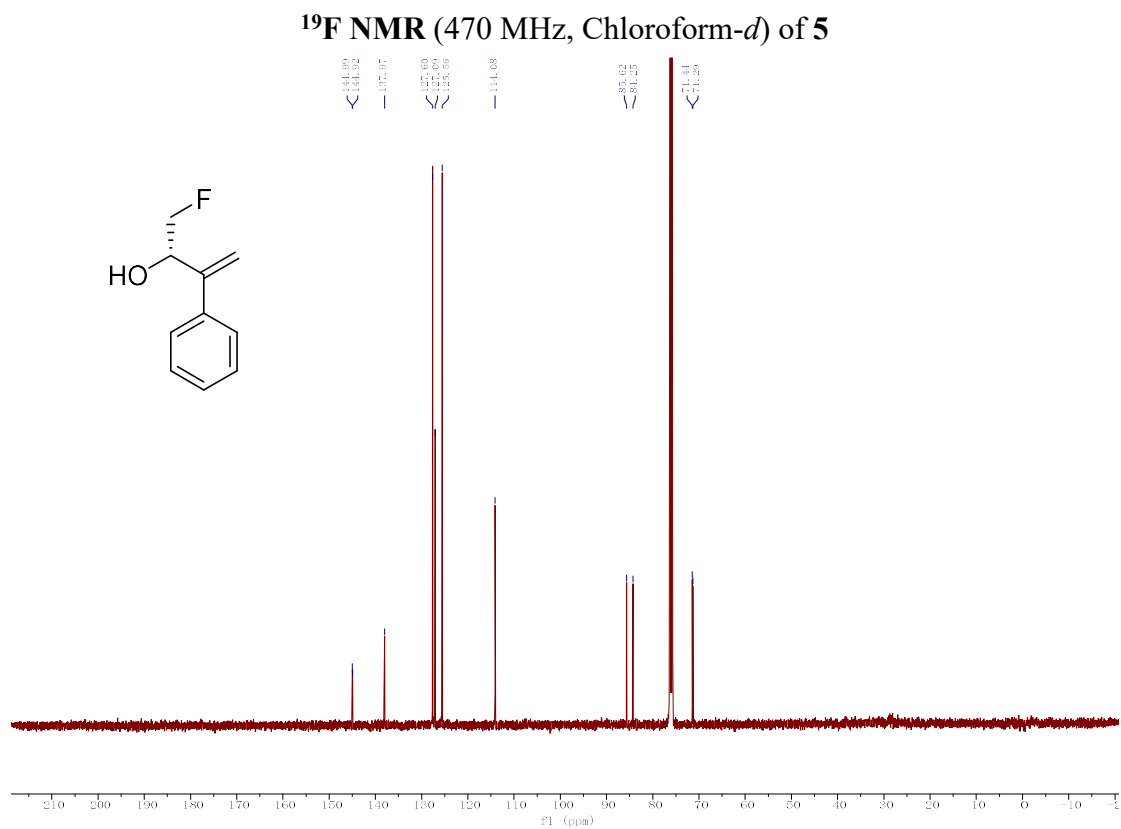

# $^1\text{H}$ and $^{13}\text{C}$ NMR spectra of 6

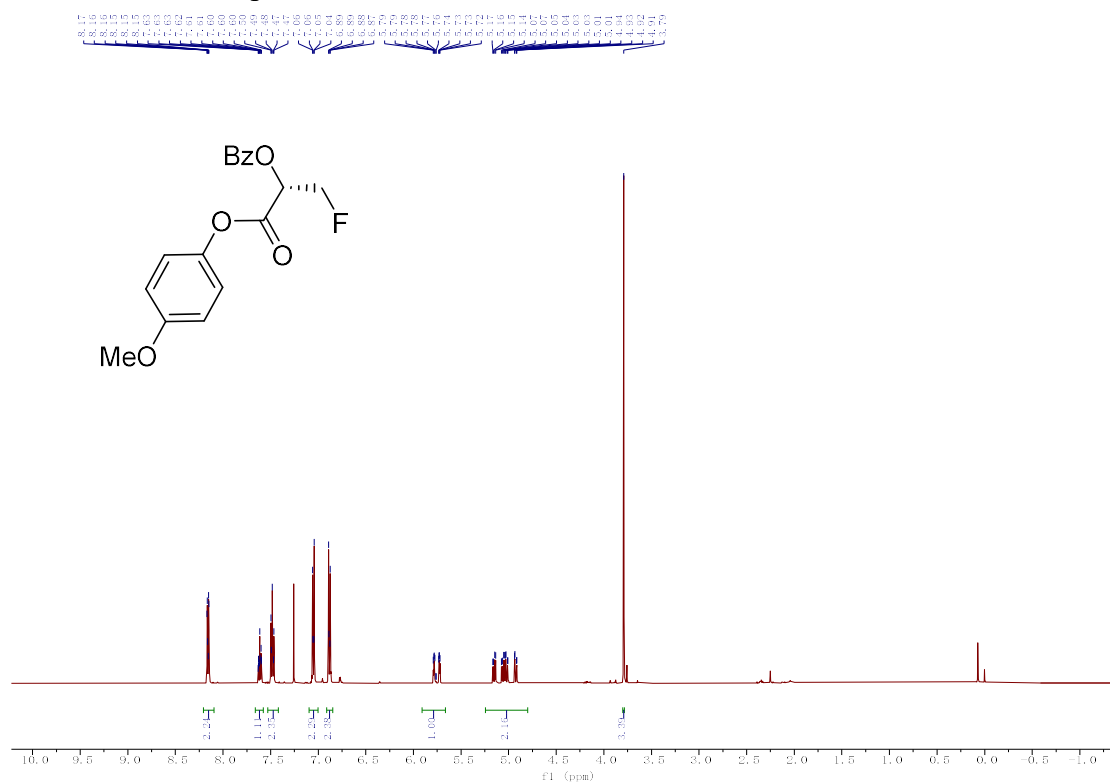

$^1\text{H}$  NMR (500 MHz, Chloroform-*d*) of 6

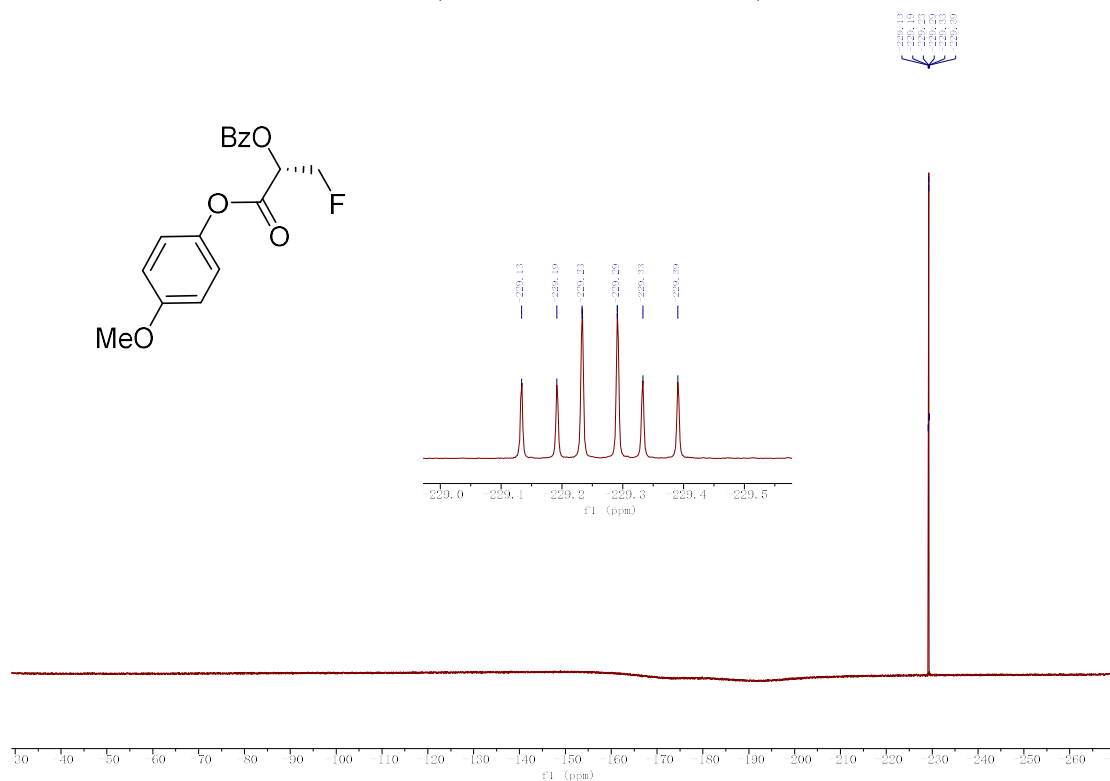

$^{19}\text{F}$  NMR (470 MHz, Chloroform-*d*) of 6

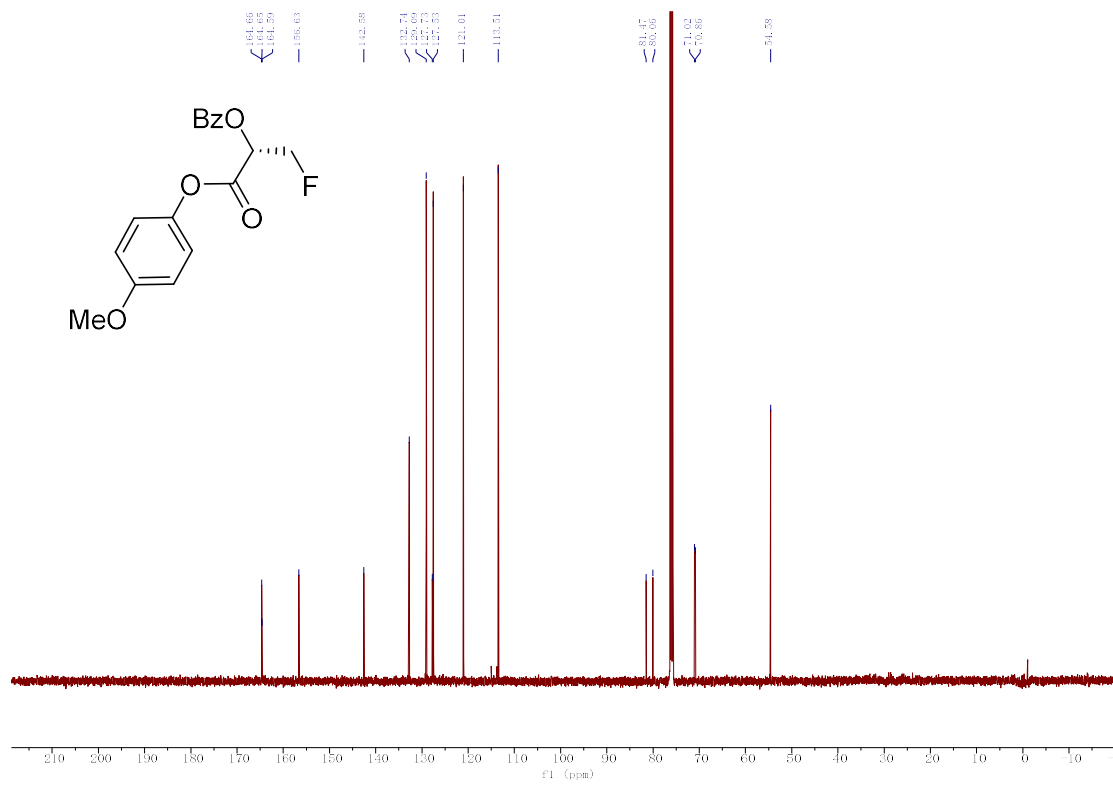

$^{13}\text{C}$  NMR (126 MHz, Chloroform-*d*) of **6**

$^1\text{H}$  and  $^{13}\text{C}$  NMR spectra of **8**

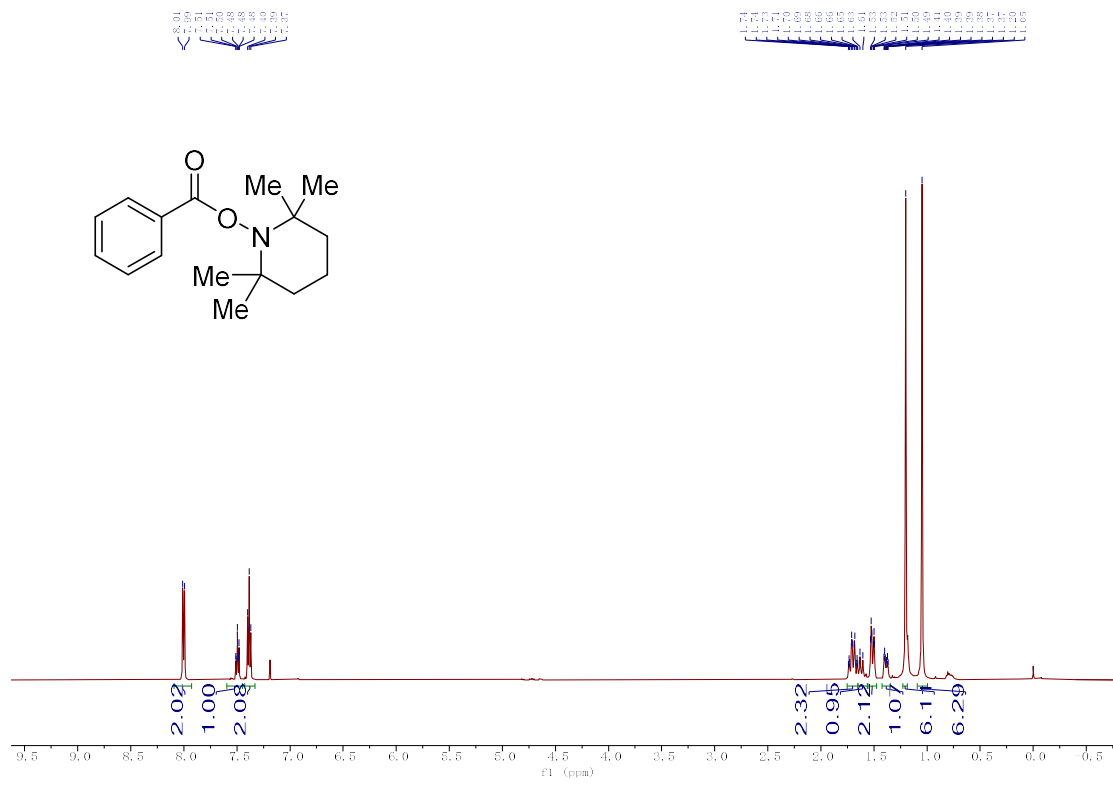

$^1\text{H}$  NMR (500 MHz, Chloroform-*d*) of **8**

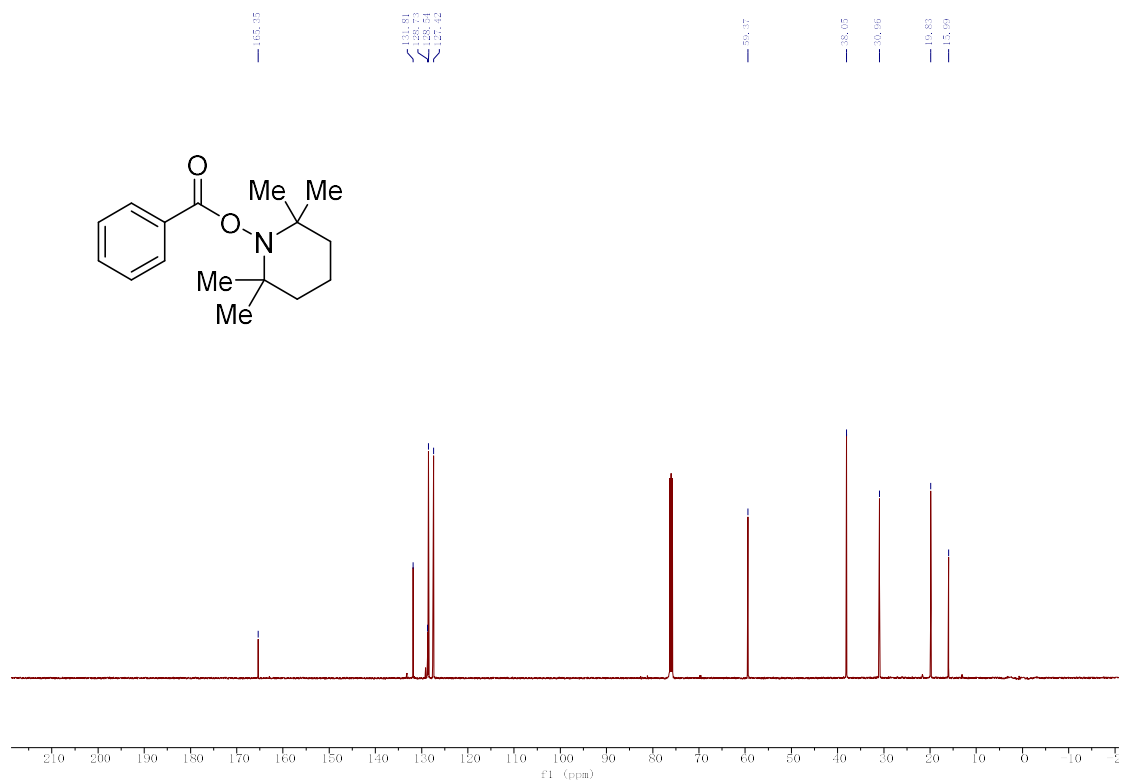

$^{13}\text{C}$  NMR (126 MHz, Chloroform-*d*) of **8**

$^1\text{H}$  and  $^{13}\text{C}$  NMR spectra of **10**

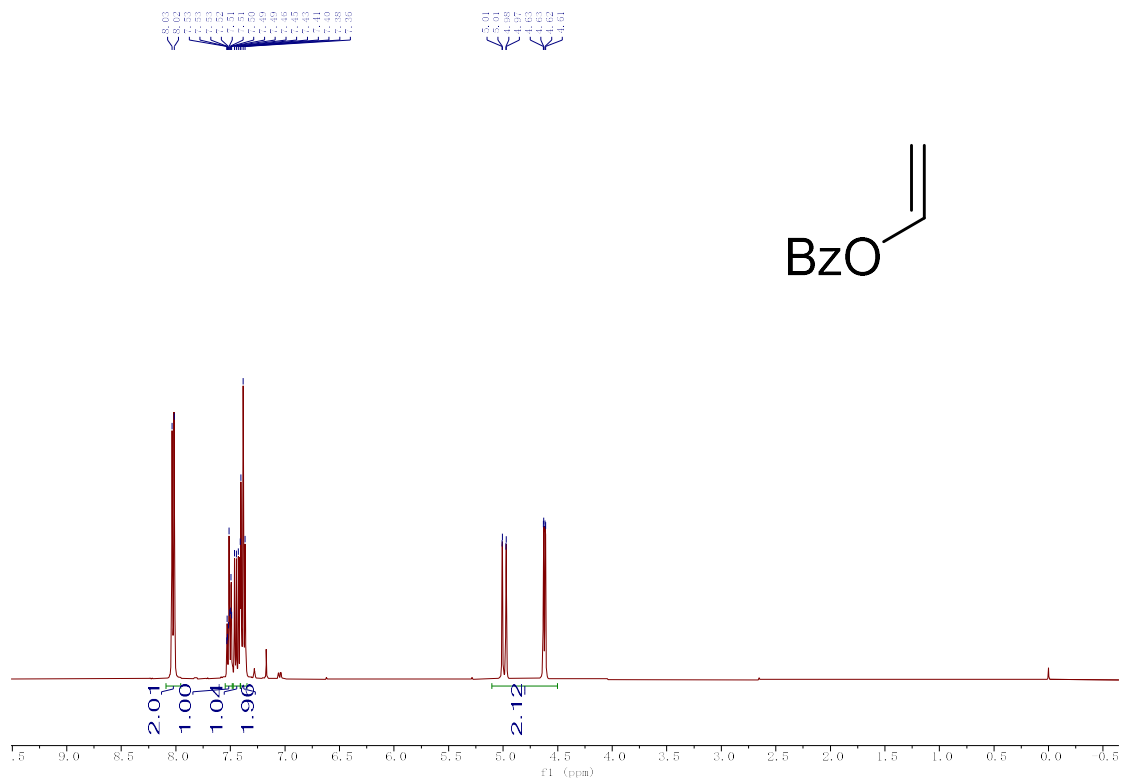

$^1\text{H}$  NMR (500 MHz, Chloroform-*d*) of **10**

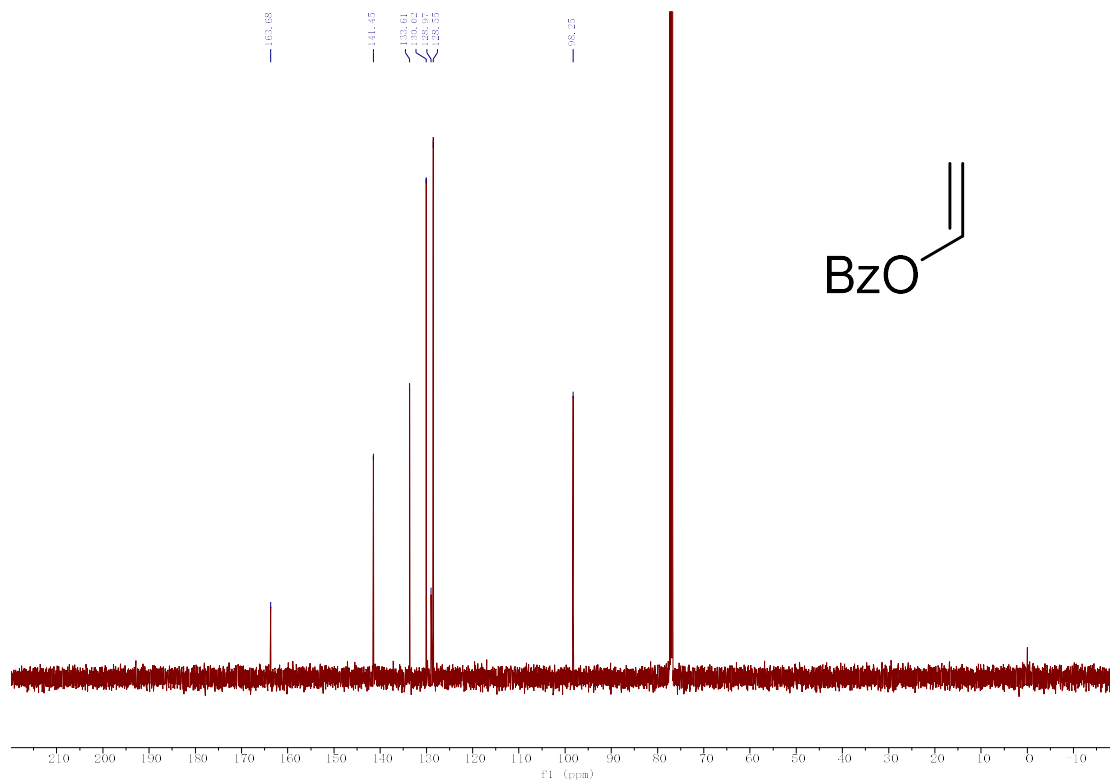

<sup>13</sup>C NMR (126 MHz, Chloroform-*d*) of **10**

<sup>1</sup>H, <sup>13</sup>C, and <sup>19</sup>F NMR spectra of **11**

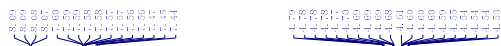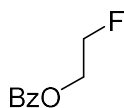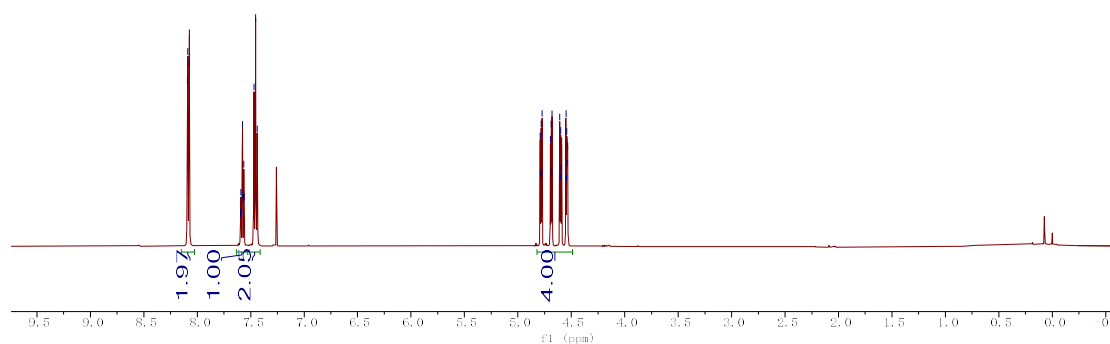

<sup>1</sup>H NMR (500 MHz, Chloroform-*d*) of **11**

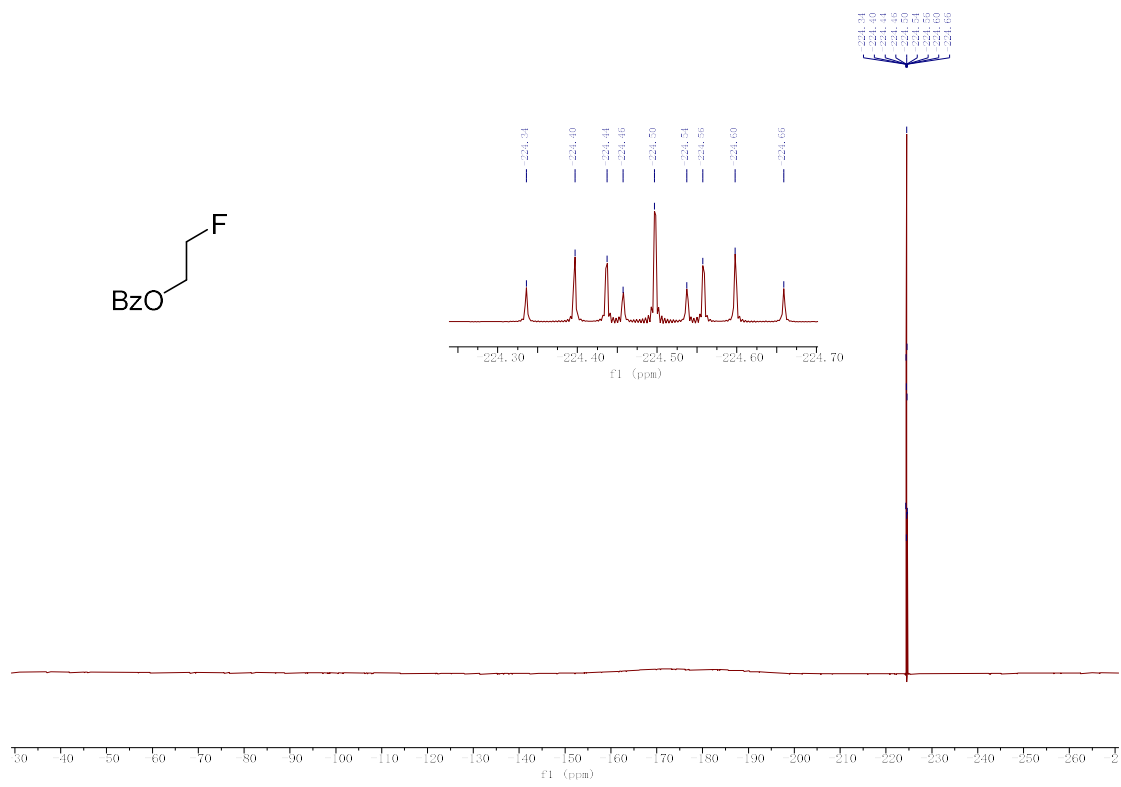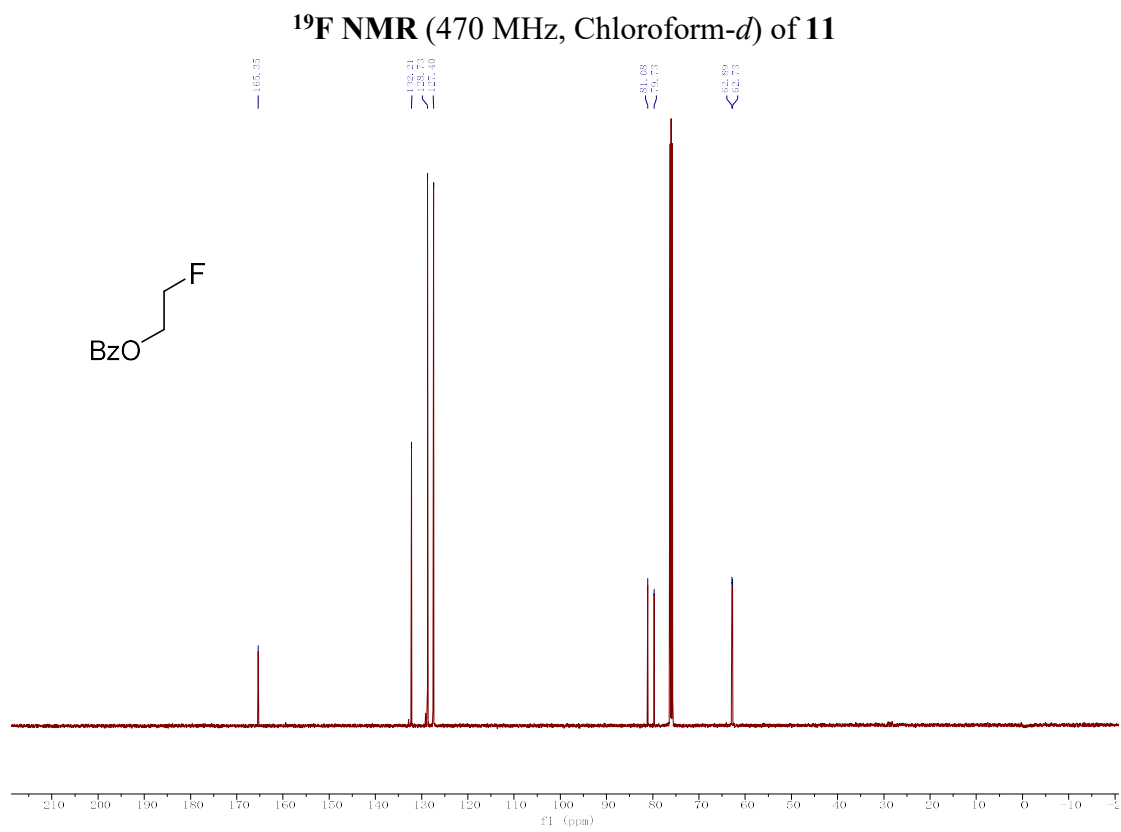



## 11 HPLC charts of the related compounds

2a 254nm, IA, *n*-Hexane : *i*PrOH = 90:10, 0.8 mL/min

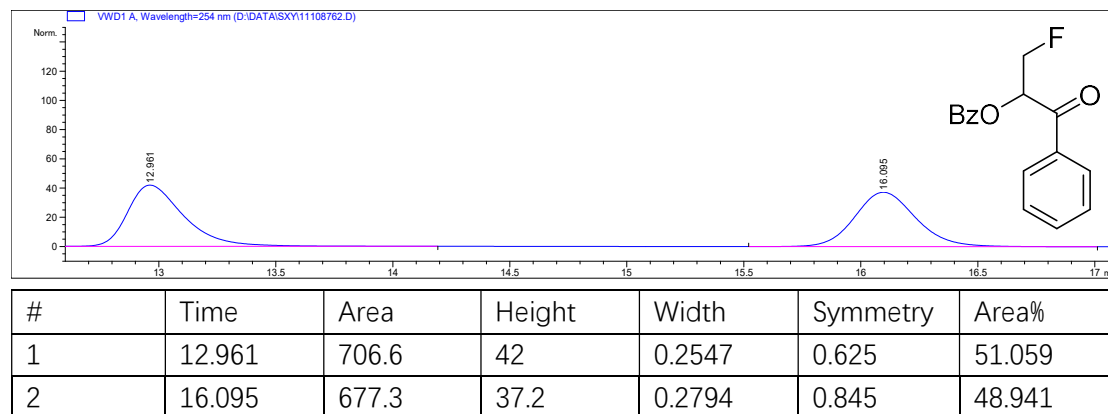

2a 254nm, IA, *n*-Hexane : *i*PrOH = 90:10, 0.8 mL/min

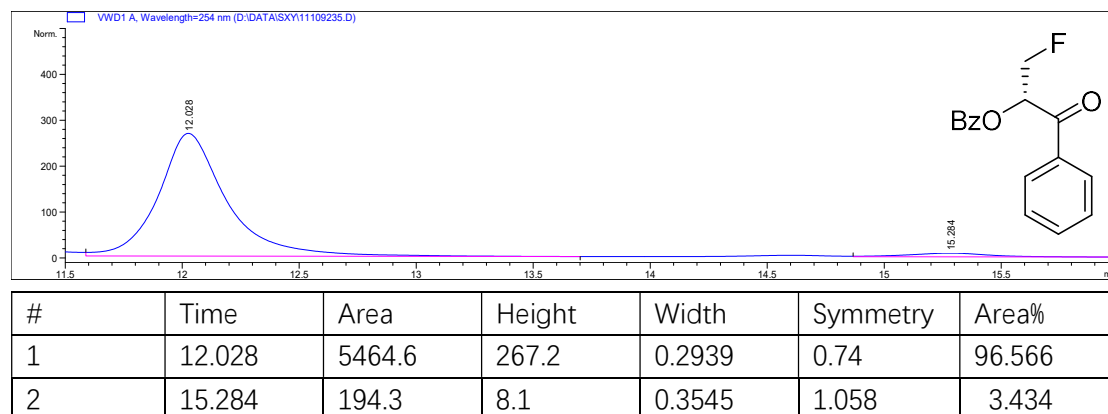

**2b** 254nm, IB, *n*-Hexane : *i*PrOH = 90:10, 0.8 mL/min

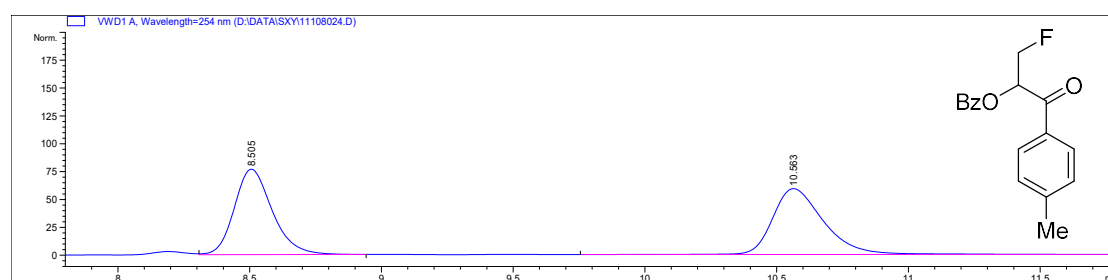

| # | Time   | Area  | Height | Width  | Symmetry | Area%  |
|---|--------|-------|--------|--------|----------|--------|
| 1 | 8.505  | 767.4 | 76.7   | 0.1516 | 0.772    | 48.884 |
| 2 | 10.563 | 802.5 | 59.1   | 0.2064 | 0.643    | 51.116 |

**2b** 254nm, IB, *n*-Hexane : *i*PrOH = 90:10, 0.8 mL/min

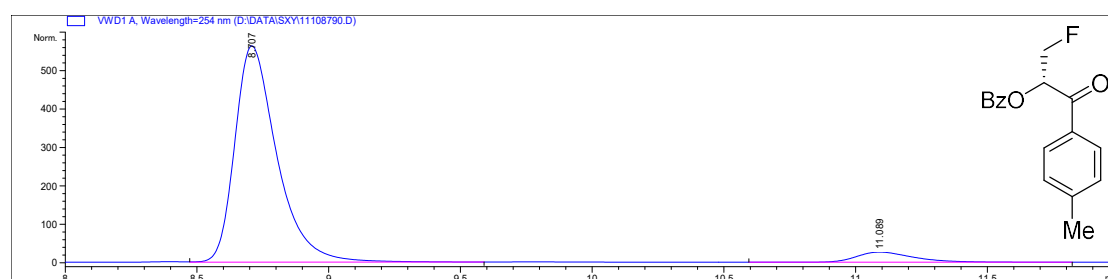

| # | Time   | Area   | Height | Width  | Symmetry | Area%  |
|---|--------|--------|--------|--------|----------|--------|
| 1 | 8.707  | 6245.1 | 563.1  | 0.1687 | 0.631    | 94.087 |
| 2 | 11.089 | 392.5  | 26.3   | 0.225  | 0.651    | 5.913  |

**2c** 254nm, IB, *n*-Hexane : *i*PrOH = 90:10, 0.8 mL/min

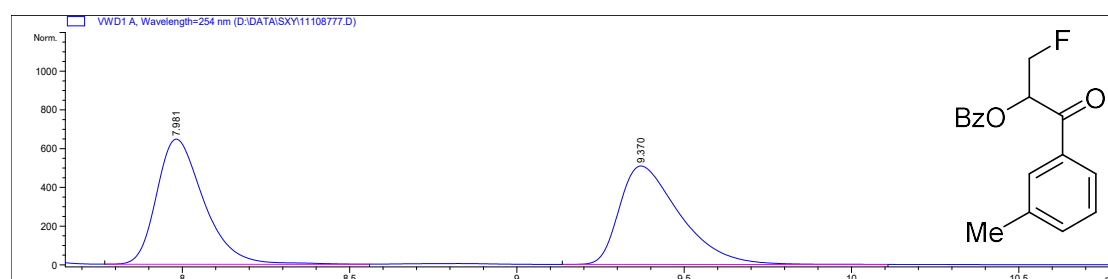

| # | Time  | Area   | Height | Width  | Symmetry | Area%  |
|---|-------|--------|--------|--------|----------|--------|
| 1 | 7.981 | 6359.6 | 646.6  | 0.1497 | 0.663    | 49.909 |
| 2 | 9.37  | 6382.8 | 508.3  | 0.1887 | 0.517    | 50.091 |

**2c** 254nm, IB, *n*-Hexane : *i*PrOH = 90:10, 0.8 mL/min

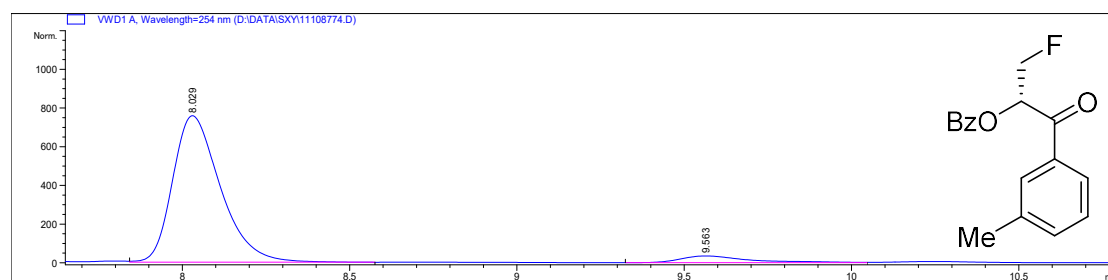

| # | Time  | Area   | Height | Width  | Symmetry | Area%  |
|---|-------|--------|--------|--------|----------|--------|
| 1 | 8.029 | 7500.8 | 757.2  | 0.1505 | 0.664    | 93.873 |
| 2 | 9.563 | 489.6  | 34.6   | 0.2072 | 0.516    | 6.127  |

**2d** 254nm, IB, *n*-Hexane : *i*PrOH = 90:10, 0.8 mL/min

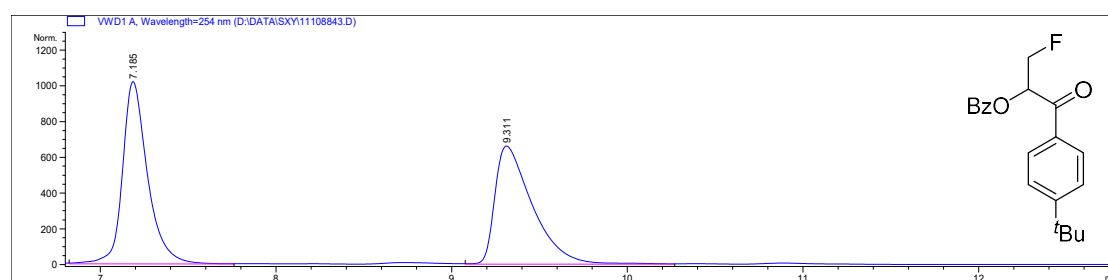

| # | Time  | Area    | Height | Width  | Symmetry | Area%  |
|---|-------|---------|--------|--------|----------|--------|
| 1 | 7.185 | 10137.9 | 1020.5 | 0.1479 | 0.696    | 50.827 |
| 2 | 9.311 | 9807.9  | 660.9  | 0.2212 | 0.413    | 49.173 |

**2d** 254nm, IB, *n*-Hexane : *i*PrOH = 90:10, 0.8 mL/min

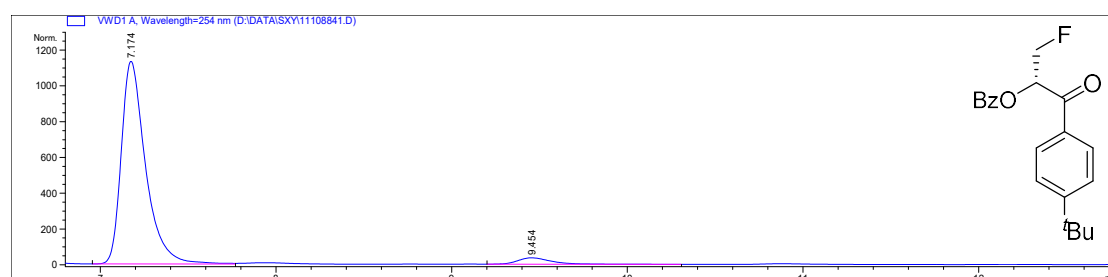

| # | Time  | Area    | Height | Width  | Symmetry | Area%  |
|---|-------|---------|--------|--------|----------|--------|
| 1 | 7.174 | 10875.6 | 1133.3 | 0.144  | 0.609    | 95.646 |
| 2 | 9.454 | 495.1   | 36     | 0.2054 | 0.624    | 4.354  |

**2e** 254nm, IB, *n*-Hexane : *i*PrOH = 90:10, 0.8 mL/min

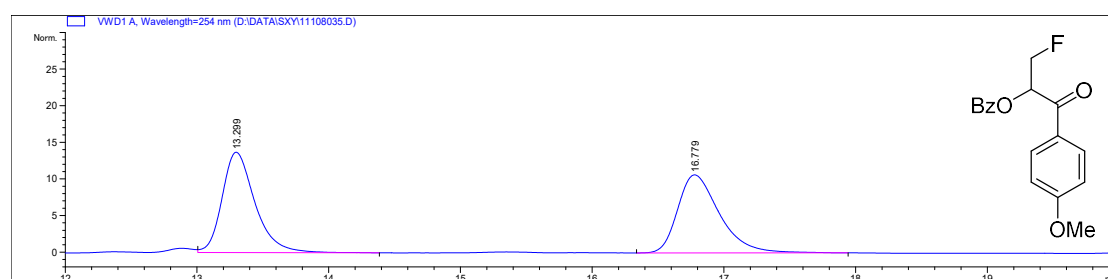

| # | Time   | Area  | Height | Width  | Symmetry | Area%  |
|---|--------|-------|--------|--------|----------|--------|
| 1 | 13.299 | 238.3 | 13.7   | 0.264  | 0.7      | 50.368 |
| 2 | 16.779 | 234.8 | 10.7   | 0.3371 | 0.634    | 49.632 |

**2e** 254nm, IB, *n*-Hexane : *i*PrOH = 90:10, 0.8 mL/min

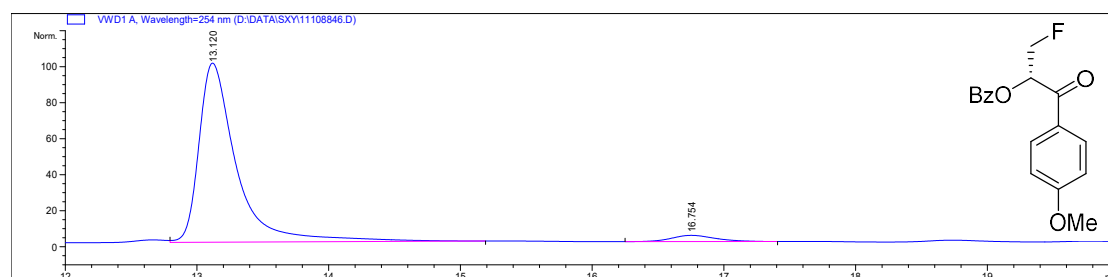

| # | Time   | Area   | Height | Width  | Symmetry | Area%  |
|---|--------|--------|--------|--------|----------|--------|
| 1 | 13.120 | 1968.5 | 99.5   | 0.2921 | 0.515    | 96.126 |
| 2 | 16.754 | 79.3   | 3.4    | 0.3517 | 0.789    | 3.874  |

**2f** 254nm, IB, *n*-Hexane : *i*PrOH = 90:10, 0.8 mL/min

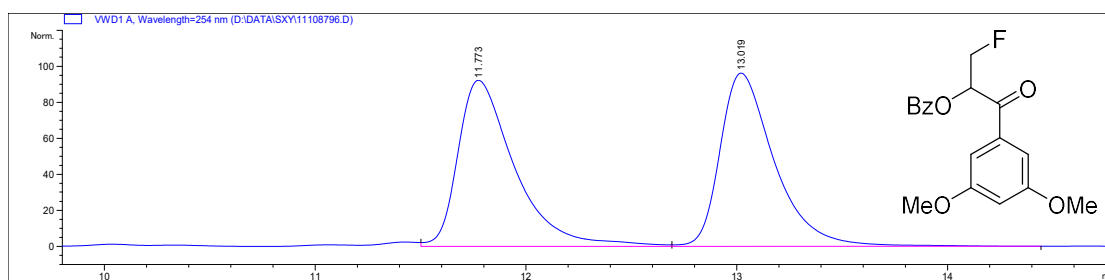

| # | Time   | Area   | Height | Width  | Symmetry | Area%  |
|---|--------|--------|--------|--------|----------|--------|
| 1 | 11.773 | 1729.4 | 92.3   | 0.2799 | 0.523    | 50.042 |
| 2 | 13.019 | 1726.4 | 96.2   | 0.2691 | 0.585    | 49.958 |

**2f** 254nm, IB, *n*-Hexane : *i*PrOH = 90:10, 0.8 mL/min

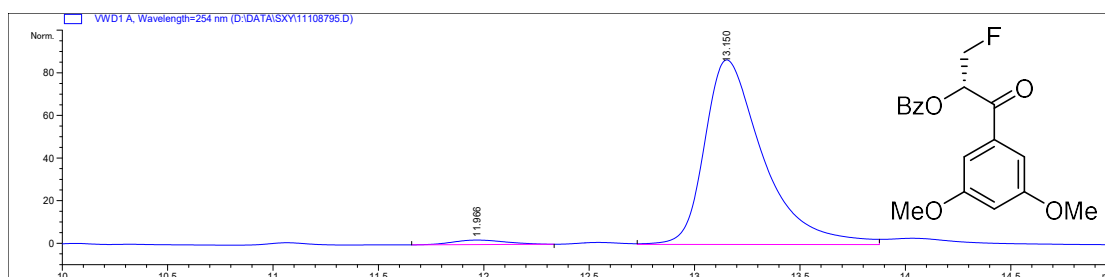

| # | Time   | Area   | Height | Width  | Symmetry | Area%  |
|---|--------|--------|--------|--------|----------|--------|
| 1 | 11.966 | 36.3   | 2.1    | 0.2715 | 0.819    | 2.123  |
| 2 | 13.15  | 1674.1 | 86.6   | 0.2881 | 0.566    | 97.877 |

**2g** 254nm, IB, *n*-Hexane : *i*PrOH = 90:10, 0.8 mL/min

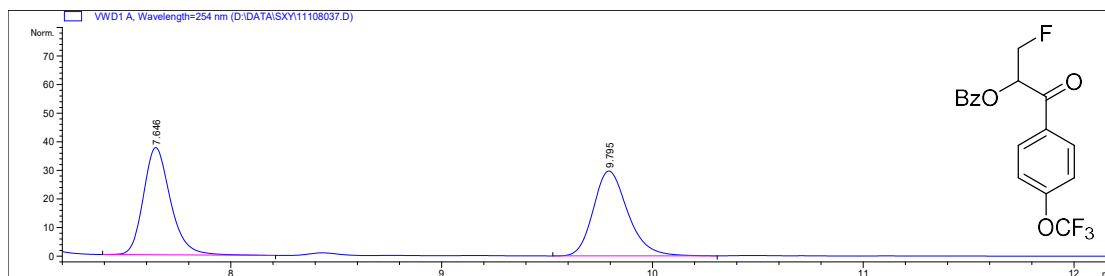

| # | Time  | Area  | Height | Width  | Symmetry | Area%  |
|---|-------|-------|--------|--------|----------|--------|
| 1 | 7.646 | 335.5 | 37.5   | 0.1363 | 0.773    | 49.827 |
| 2 | 9.795 | 337.8 | 29.7   | 0.1735 | 0.772    | 50.173 |

**2g** 254nm, IB, *n*-Hexane : *i*PrOH = 90:10, 0.8 mL/min

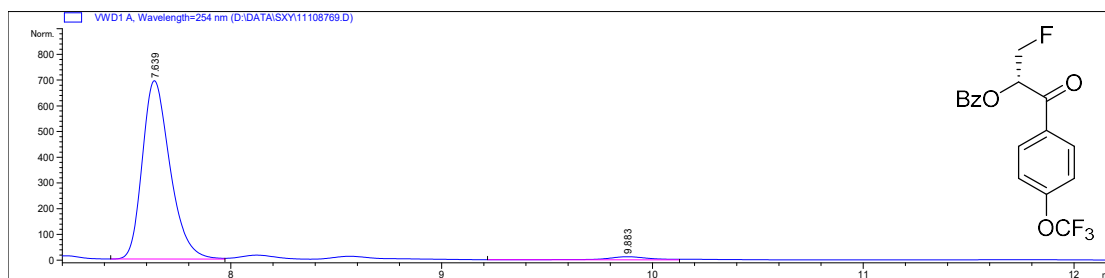

| # | Time  | Area   | Height | Width  | Symmetry | Area%  |
|---|-------|--------|--------|--------|----------|--------|
| 1 | 7.639 | 6326.8 | 693.5  | 0.1399 | 0.715    | 97.494 |
| 2 | 9.883 | 162.6  | 11.9   | 0.2018 | 0.936    | 2.506  |

**2h** 254nm, IB, *n*-Hexane : *i*PrOH = 90:10, 0.8 mL/min

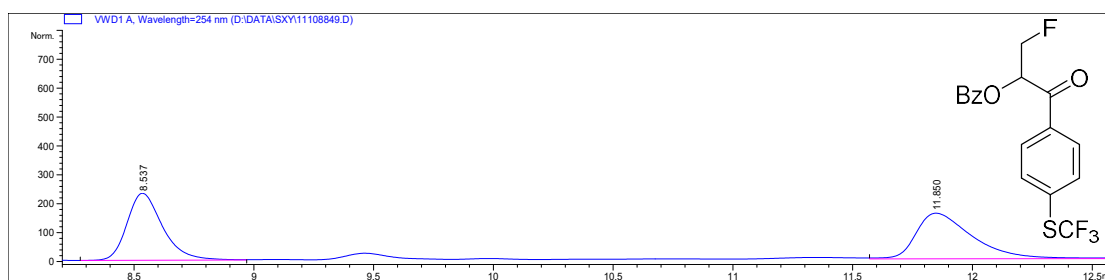

| # | Time  | Area   | Height | Width  | Symmetry | Area%  |
|---|-------|--------|--------|--------|----------|--------|
| 1 | 8.537 | 2397.6 | 231.9  | 0.157  | 0.716    | 47.453 |
| 2 | 11.85 | 2655.1 | 158    | 0.2499 | 0.498    | 52.547 |

**2h** 254nm, IB, *n*-Hexane : *i*PrOH = 90:10, 0.8 mL/min

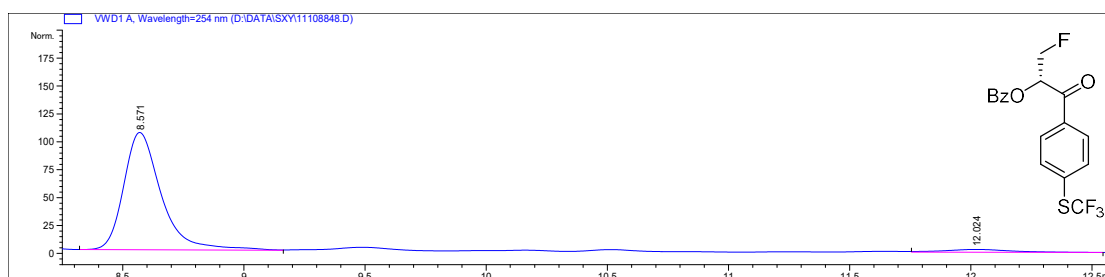

| # | Time   | Area | Height | Width  | Symmetry | Area%  |
|---|--------|------|--------|--------|----------|--------|
| 1 | 8.571  | 1132 | 105.1  | 0.162  | 0.685    | 95.913 |
| 2 | 12.024 | 48.2 | 2.5    | 0.2813 | 0.91     | 4.087  |

**2i** 254nm, IB, *n*-Hexane : *i*PrOH = 90:10, 0.8 mL/min

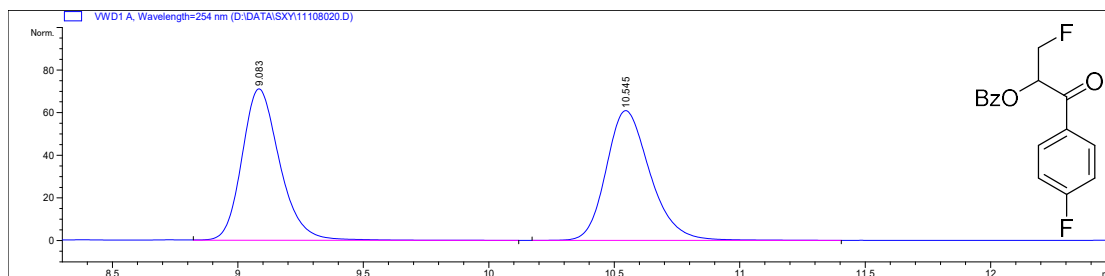

| # | Time   | Area  | Height | Width  | Symmetry | Area%  |
|---|--------|-------|--------|--------|----------|--------|
| 1 | 9.083  | 741.5 | 71.1   | 0.1596 | 0.769    | 50.042 |
| 2 | 10.545 | 740.2 | 60.9   | 0.1855 | 0.76     | 49.958 |

**2i** 254nm, IB, *n*-Hexane : *i*PrOH = 90:10, 0.8 mL/min

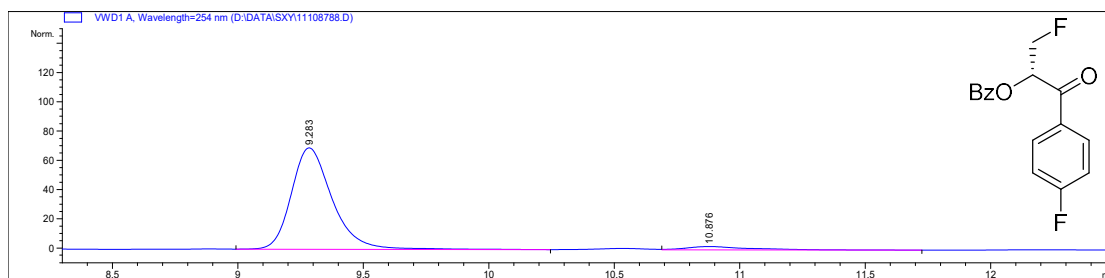

| # | Time   | Area  | Height | Width  | Symmetry | Area%  |
|---|--------|-------|--------|--------|----------|--------|
| 1 | 9.283  | 789.4 | 69.4   | 0.1735 | 0.718    | 95.189 |
| 2 | 10.876 | 39.9  | 2.3    | 0.2483 | 0.487    | 4.811  |

**2j** 254nm, IB, *n*-Hexane : *i*PrOH = 90:10, 0.8 mL/min

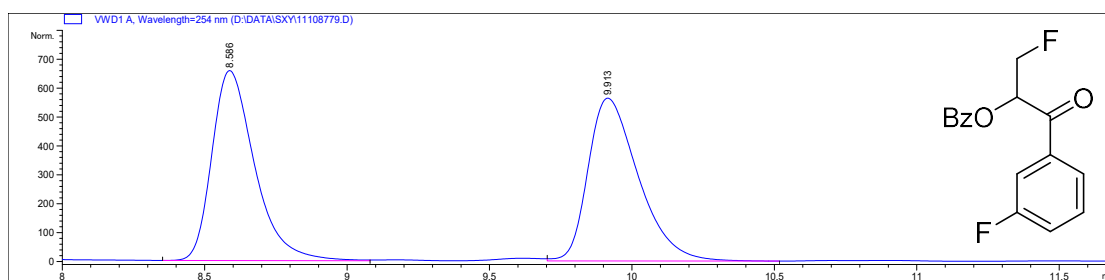

| # | Time  | Area   | Height | Width  | Symmetry | Area%  |
|---|-------|--------|--------|--------|----------|--------|
| 1 | 8.586 | 6863.8 | 657.4  | 0.1597 | 0.66     | 49.827 |
| 2 | 9.913 | 6911.4 | 563.2  | 0.1883 | 0.609    | 50.173 |

**2j** 254nm, IB, *n*-Hexane : *i*PrOH = 90:10, 0.8 mL/min

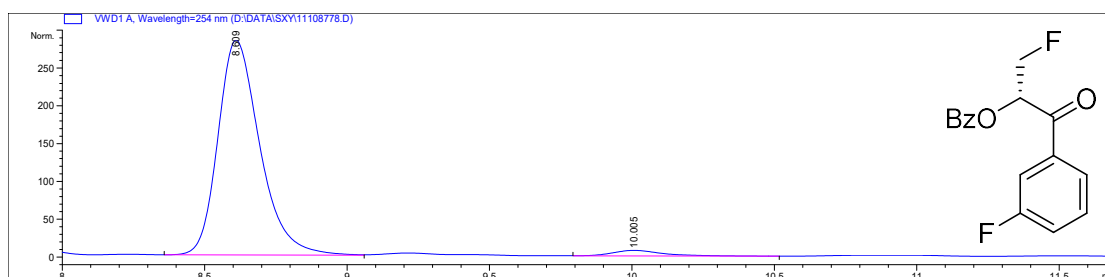

| # | Time   | Area | Height | Width  | Symmetry | Area%  |
|---|--------|------|--------|--------|----------|--------|
| 1 | 8.609  | 2904 | 284.4  | 0.1555 | 0.715    | 97.056 |
| 2 | 10.005 | 88.1 | 7.3    | 0.1822 | 0.694    | 2.944  |

**2k** 254nm, IB, *n*-Hexane : *i*PrOH = 90:10, 0.8 mL/min

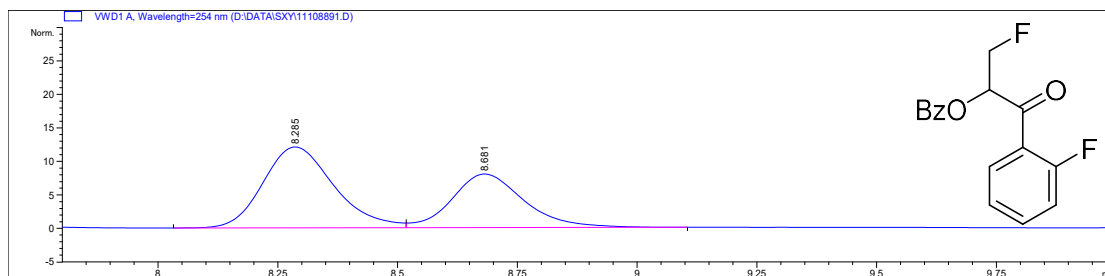

| # | Time  | Area  | Height | Width  | Symmetry | Area%  |
|---|-------|-------|--------|--------|----------|--------|
| 1 | 8.285 | 124.3 | 12.1   | 0.1594 | 0.789    | 59.908 |
| 2 | 8.681 | 83.2  | 8      | 0.1593 | 0.79     | 40.092 |

**2k** 254nm, IB, *n*-Hexane : *i*PrOH = 90:10, 0.8 mL/min

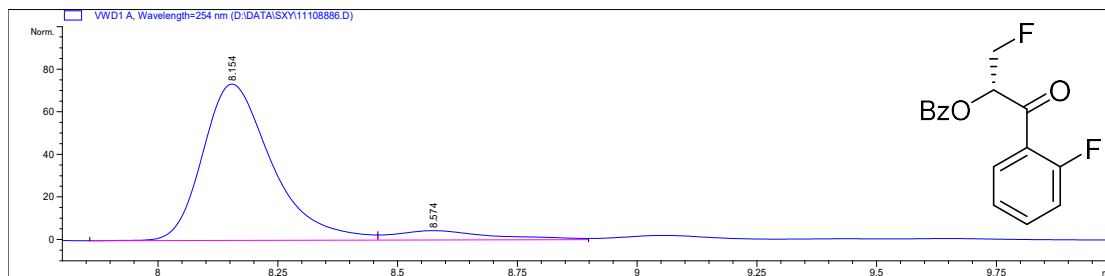

| # | Time  | Area  | Height | Width  | Symmetry | Area%  |
|---|-------|-------|--------|--------|----------|--------|
| 1 | 8.154 | 737.2 | 73.5   | 0.1534 | 0.686    | 92.420 |
| 2 | 8.574 | 60.5  | 4.4    | 0.1964 | 0.578    | 7.580  |

**2l** 254nm, IB, *n*-Hexane : *i*PrOH = 90:10, 0.8 mL/min

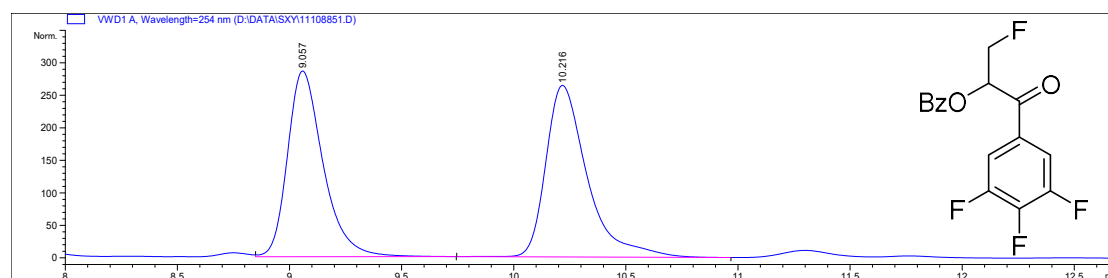

| # | Time   | Area   | Height | Width  | Symmetry | Area%  |
|---|--------|--------|--------|--------|----------|--------|
| 1 | 9.057  | 3152.7 | 285.6  | 0.1681 | 0.691    | 48.263 |
| 2 | 10.216 | 3379.6 | 263.9  | 0.1946 | 0.622    | 51.737 |

**2l** 254nm, IB, *n*-Hexane : *i*PrOH = 90:10, 0.8 mL/min

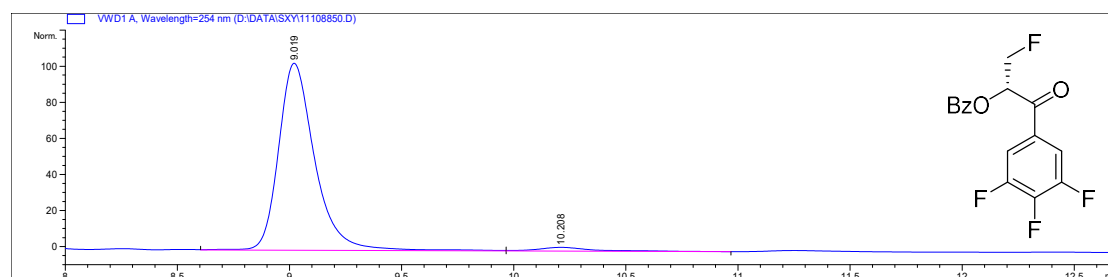

| # | Time   | Area   | Height | Width  | Symmetry | Area%  |
|---|--------|--------|--------|--------|----------|--------|
| 1 | 9.019  | 1168.1 | 103.7  | 0.1707 | 0.702    | 97.070 |
| 2 | 10.208 | 35.3   | 2.1    | 0.247  | 0.624    | 2.930  |

**2m** 254nm, IB, *n*-Hexane : *i*PrOH = 90:10, 0.8 mL/min

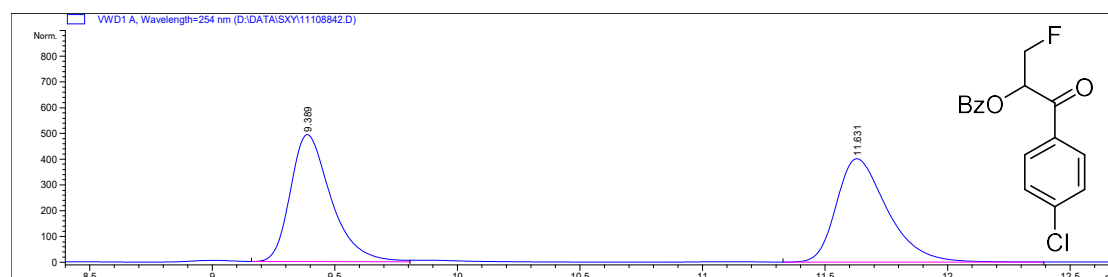

| # | Time   | Area   | Height | Width  | Symmetry | Area%  |
|---|--------|--------|--------|--------|----------|--------|
| 1 | 9.389  | 5679   | 493.5  | 0.175  | 0.665    | 49.490 |
| 2 | 11.631 | 5796.1 | 401.8  | 0.2192 | 0.633    | 50.510 |

**2m** 254nm, IB, *n*-Hexane : *i*PrOH = 90:10, 0.8 mL/min

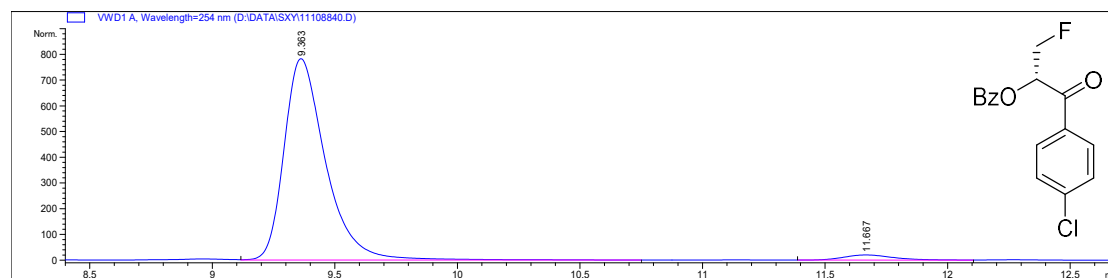

| # | Time   | Area   | Height | Width  | Symmetry | Area%  |
|---|--------|--------|--------|--------|----------|--------|
| 1 | 9.363  | 9223.2 | 782.9  | 0.1768 | 0.633    | 97.004 |
| 2 | 11.667 | 284.9  | 20.1   | 0.2167 | 0.739    | 2.996  |

**2n** 254nm, IB, *n*-Hexane : *i*PrOH = 90:10, 0.8 mL/min

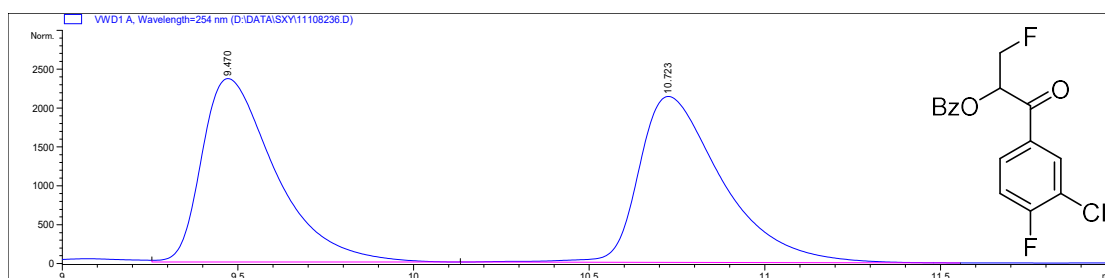

| # | Time   | Area    | Height | Width  | Symmetry | Area%  |
|---|--------|---------|--------|--------|----------|--------|
| 1 | 9.47   | 34215.2 | 2359   | 0.2187 | 0.514    | 49.359 |
| 2 | 10.723 | 35104.3 | 2133.6 | 0.2487 | 0.519    | 50.641 |

**2n** 254nm, IB, *n*-Hexane : *i*PrOH = 90:10, 0.8 mL/min

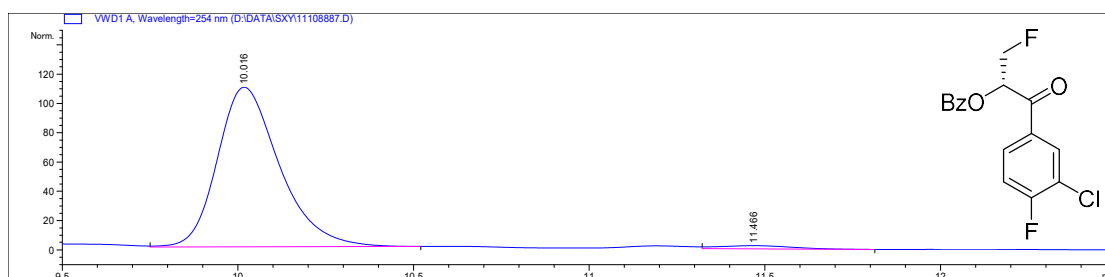

| # | Time   | Area   | Height | Width  | Symmetry | Area%  |
|---|--------|--------|--------|--------|----------|--------|
| 1 | 10.016 | 1341.2 | 109    | 0.1872 | 0.721    | 97.724 |
| 2 | 11.466 | 31.2   | 2.2    | 0.2189 | 0.845    | 2.276  |

**2o** 254nm, IB, *n*-Hexane : *i*PrOH = 90:10, 0.8 mL/min

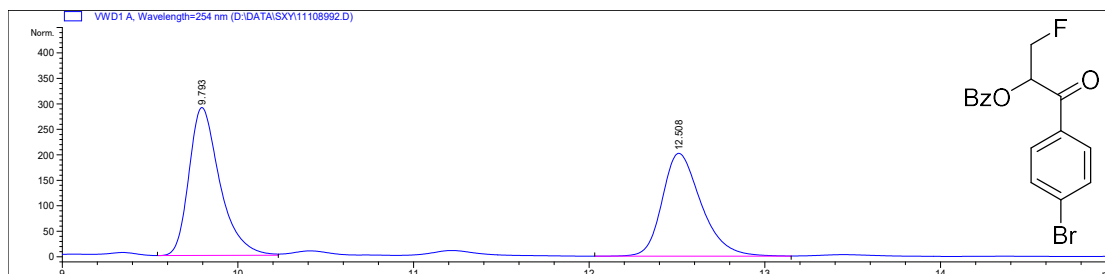

| # | Time   | Area   | Height | Width  | Symmetry | Area%  |
|---|--------|--------|--------|--------|----------|--------|
| 1 | 9.793  | 3541.5 | 290.5  | 0.1845 | 0.67     | 53.213 |
| 2 | 12.508 | 3113.8 | 201.9  | 0.2353 | 0.704    | 46.787 |

**2o** 254nm, IB, *n*-Hexane : *i*PrOH = 90:10, 0.8 mL/min

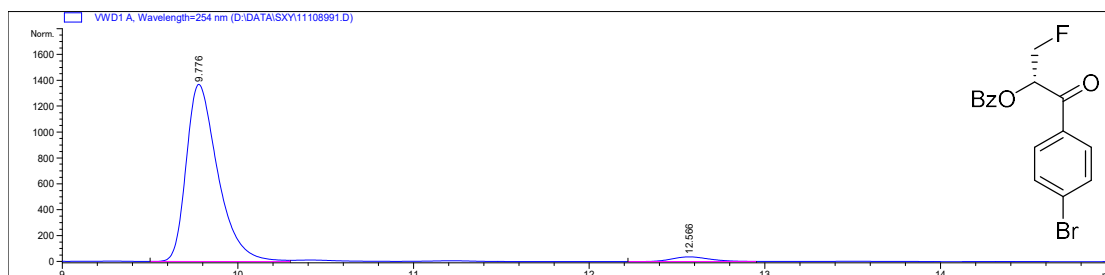

| # | Time   | Area    | Height | Width  | Symmetry | Area%  |
|---|--------|---------|--------|--------|----------|--------|
| 1 | 9.776  | 17058.1 | 1369.7 | 0.189  | 0.616    | 97.014 |
| 2 | 12.566 | 525     | 35.8   | 0.2265 | 0.831    | 2.986  |



**2p** 254nm, IB, *n*-Hexane : *i*PrOH = 90:10, 0.8 mL/min

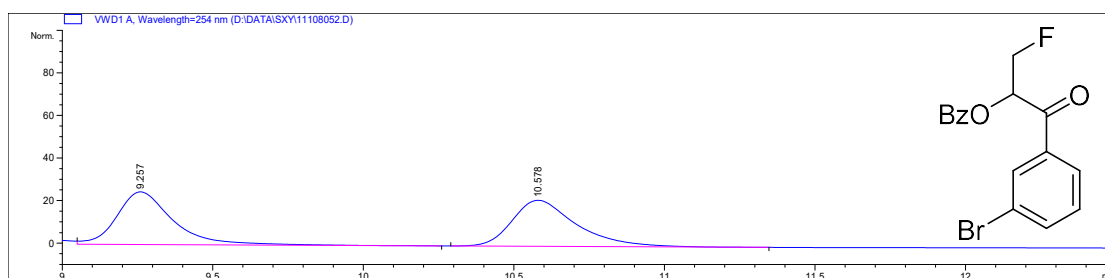

| # | Time   | Area  | Height | Width  | Symmetry | Area%  |
|---|--------|-------|--------|--------|----------|--------|
| 1 | 9.257  | 321.5 | 24.7   | 0.1939 | 0.679    | 50.112 |
| 2 | 10.578 | 320   | 21.6   | 0.2192 | 0.636    | 49.888 |

**2p** 254nm, IB, *n*-Hexane : *i*PrOH = 90:10, 0.8 mL/min

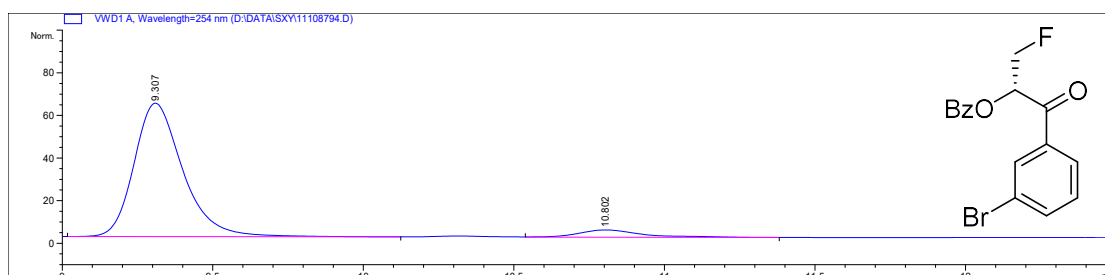

| # | Time   | Area  | Height | Width  | Symmetry | Area%  |
|---|--------|-------|--------|--------|----------|--------|
| 1 | 9.307  | 705.1 | 62.6   | 0.1721 | 0.723    | 93.422 |
| 2 | 10.802 | 49.6  | 3.4    | 0.2179 | 0.679    | 6.578  |

**2q** 254nm, IB, *n*-Hexane : *i*PrOH = 90:10, 0.8 mL/min

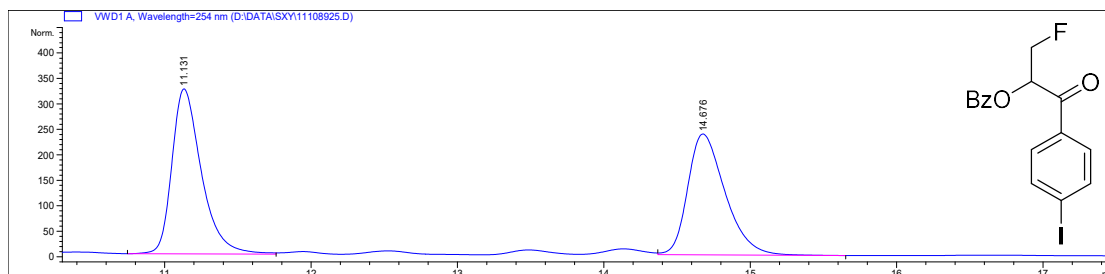

| # | Time   | Area   | Height | Width  | Symmetry | Area%  |
|---|--------|--------|--------|--------|----------|--------|
| 1 | 11.131 | 4532.7 | 323.8  | 0.2128 | 0.651    | 51.860 |
| 2 | 14.676 | 4207.6 | 237.3  | 0.2694 | 0.649    | 48.140 |

**2q** 254nm, IB, *n*-Hexane : *i*PrOH = 90:10, 0.8 mL/min

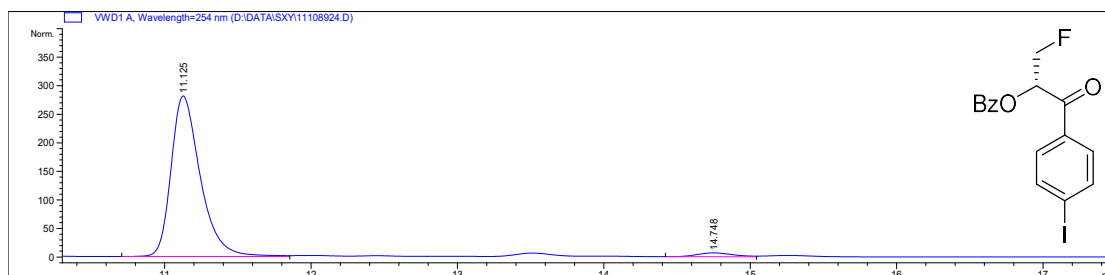

| # | Time   | Area   | Height | Width  | Symmetry | Area%  |
|---|--------|--------|--------|--------|----------|--------|
| 1 | 11.125 | 3895.2 | 281.1  | 0.2097 | 0.658    | 97.163 |
| 2 | 14.748 | 113.7  | 6.7    | 0.2615 | 0.809    | 2.837  |

**2r** 254nm, IB, *n*-Hexane : *i*PrOH = 90:10, 0.8 mL/min

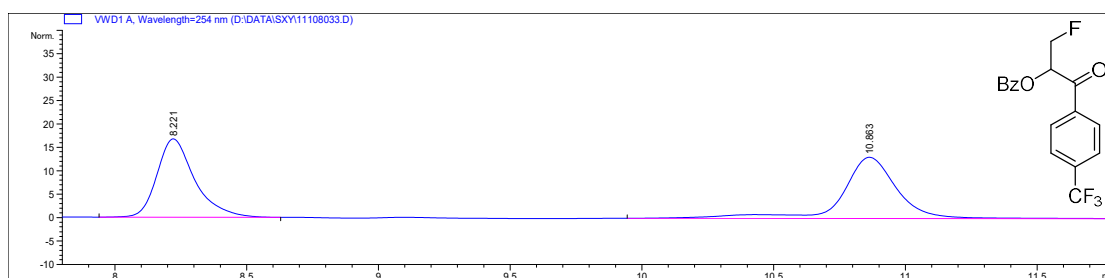

| # | Time   | Area  | Height | Width  | Symmetry | Area%  |
|---|--------|-------|--------|--------|----------|--------|
| 1 | 8.221  | 166.6 | 16.7   | 0.1482 | 0.71     | 46.678 |
| 2 | 10.863 | 190.3 | 13.1   | 0.2147 | 1.005    | 53.322 |

**2r** 254nm, IB, *n*-Hexane : *i*PrOH = 90:10, 0.8 mL/min

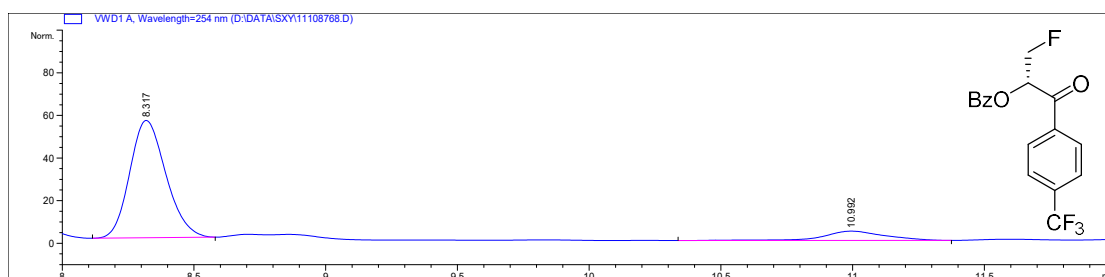

| # | Time   | Area  | Height | Width  | Symmetry | Area%  |
|---|--------|-------|--------|--------|----------|--------|
| 1 | 8.317  | 525.8 | 55.1   | 0.1477 | 0.801    | 87.959 |
| 2 | 10.992 | 72    | 4.4    | 0.2364 | 0.872    | 12.041 |

**2s** 254nm, IB, *n*-Hexane : *i*PrOH = 90:10, 0.8 mL/min

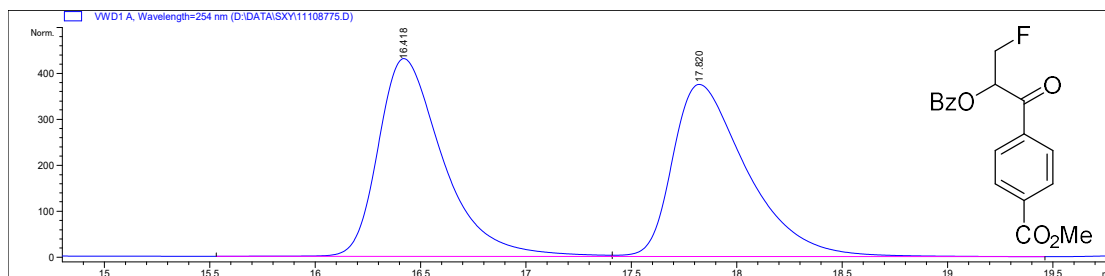

| # | Time   | Area   | Height | Width  | Symmetry | Area%  |
|---|--------|--------|--------|--------|----------|--------|
| 1 | 16.418 | 9200   | 430.4  | 0.3222 | 0.609    | 50.091 |
| 2 | 17.82  | 9166.5 | 374.5  | 0.3685 | 0.524    | 49.909 |

**2s** 254nm, IB, *n*-Hexane : *i*PrOH = 90:10, 0.8 mL/min

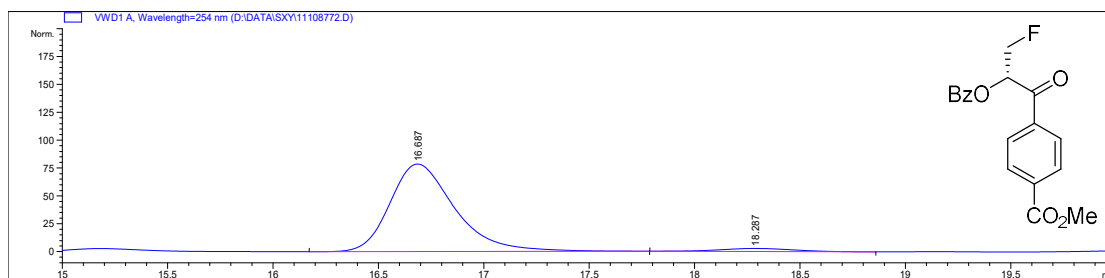

| # | Time   | Area   | Height | Width  | Symmetry | Area%  |
|---|--------|--------|--------|--------|----------|--------|
| 1 | 16.687 | 1672.6 | 78.5   | 0.3229 | 0.701    | 96.242 |
| 2 | 18.287 | 65.3   | 2.7    | 0.3667 | 0.88     | 3.758  |

**2t** 254nm, IB, *n*-Hexane : *i*PrOH = 90:10, 0.8 mL/min

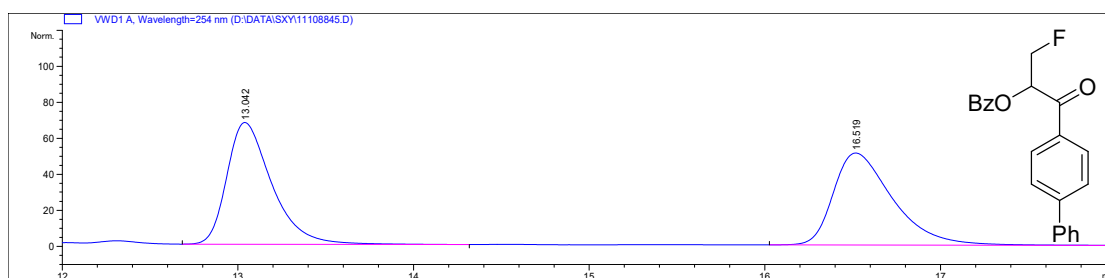

| # | Time   | Area   | Height | Width  | Symmetry | Area%  |
|---|--------|--------|--------|--------|----------|--------|
| 1 | 13.042 | 1204.2 | 67.6   | 0.2689 | 0.622    | 49.986 |
| 2 | 16.519 | 1204.9 | 51.1   | 0.3553 | 0.56     | 50.014 |

**2t** 254nm, IB, *n*-Hexane : *i*PrOH = 90:10, 0.8 mL/min

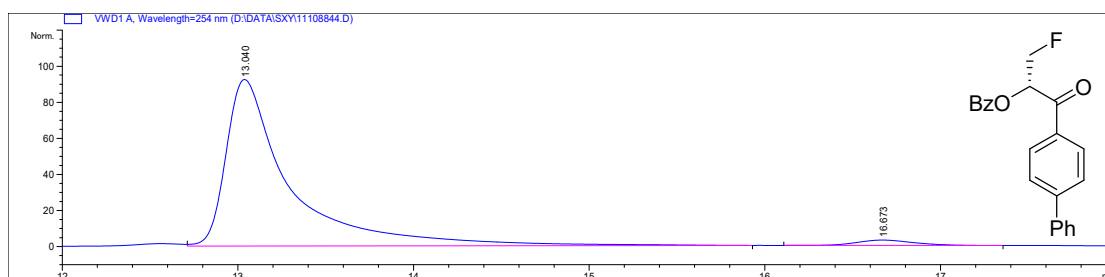

| # | Time   | Area   | Height | Width  | Symmetry | Area%  |
|---|--------|--------|--------|--------|----------|--------|
| 1 | 13.04  | 2339.4 | 92.3   | 0.3567 | 0.362    | 97.167 |
| 2 | 16.673 | 68.2   | 3      | 0.3462 | 0.794    | 2.833  |

**2u** 254nm, IB, *n*-Hexane : *i*PrOH = 90:10, 0.8 mL/min

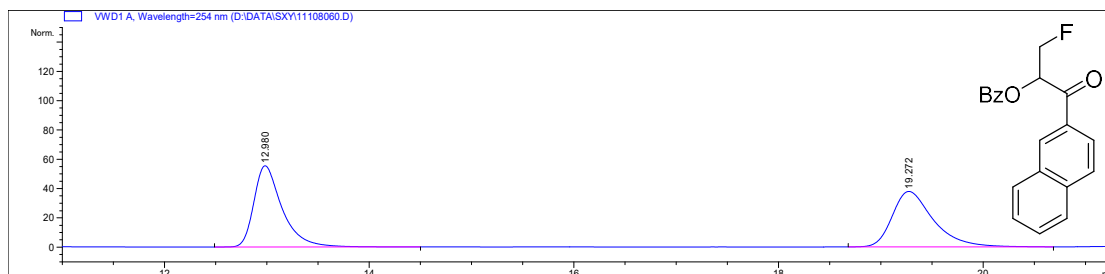

| # | Time   | Area   | Height | Width  | Symmetry | Area%  |
|---|--------|--------|--------|--------|----------|--------|
| 1 | 12.98  | 1063.3 | 55.5   | 0.2863 | 0.609    | 50.198 |
| 2 | 19.272 | 1055   | 37.8   | 0.4186 | 0.636    | 49.802 |

**2u** 254nm, IB, *n*-Hexane : *i*PrOH = 90:10, 0.8 mL/min

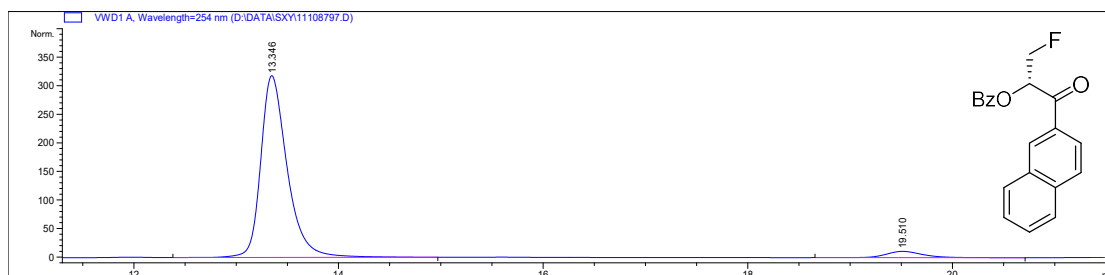

| # | Time   | Area   | Height | Width  | Symmetry | Area%  |
|---|--------|--------|--------|--------|----------|--------|
| 1 | 13.346 | 5727.2 | 318.4  | 0.2725 | 0.671    | 95.432 |
| 2 | 19.51  | 274.1  | 11     | 0.3787 | 0.787    | 4.568  |

**2v** 254nm, IB, *n*-Hexane : *i*PrOH = 90:10, 0.8 mL/min

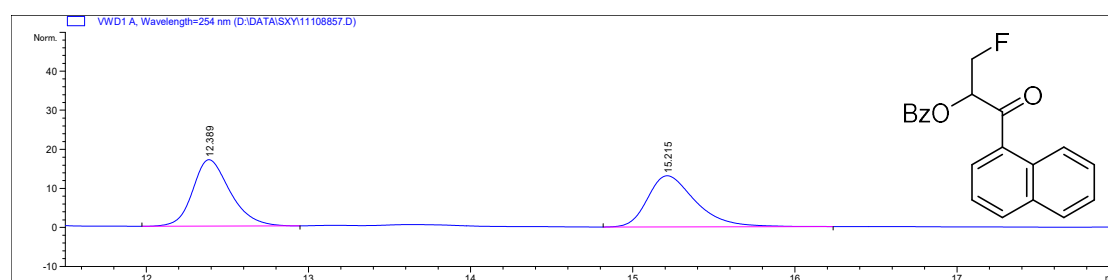

| # | Time   | Area  | Height | Width  | Symmetry | Area%  |
|---|--------|-------|--------|--------|----------|--------|
| 1 | 12.389 | 273.9 | 17     | 0.2429 | 0.736    | 50.459 |
| 2 | 15.215 | 268.9 | 13.1   | 0.3106 | 0.646    | 49.541 |

**2v** 254nm, IB, *n*-Hexane : *i*PrOH = 90:10, 0.8 mL/min

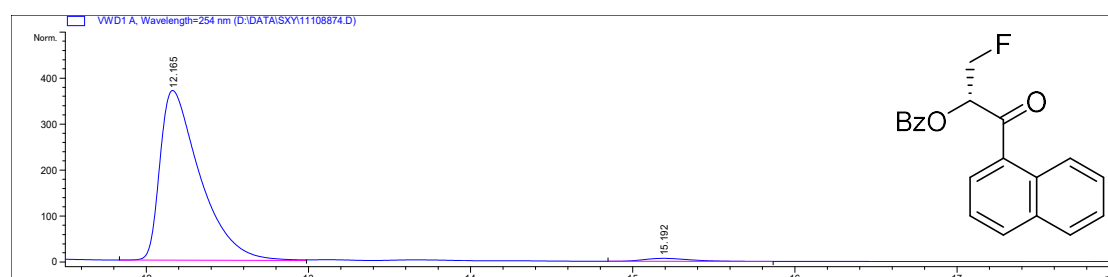

| # | Time   | Area   | Height | Width  | Symmetry | Area%  |
|---|--------|--------|--------|--------|----------|--------|
| 1 | 12.165 | 6330.3 | 369.4  | 0.2538 | 0.425    | 97.941 |
| 2 | 15.192 | 133.1  | 6.5    | 0.3099 | 0.673    | 2.059  |

**2w** 254nm, IB, *n*-Hexane : *i*PrOH = 90:10, 0.8 mL/min

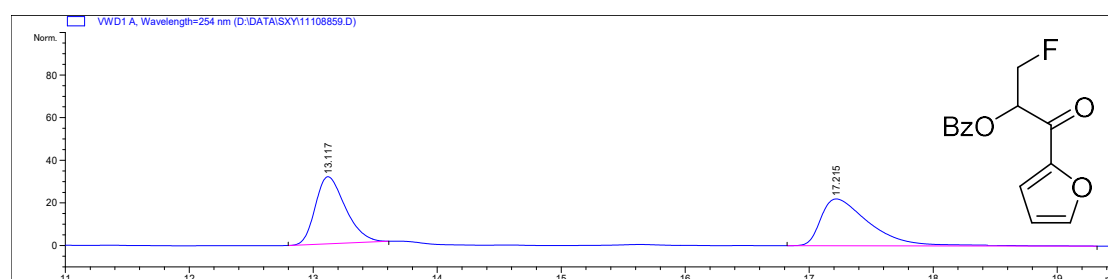

| # | Time   | Area  | Height | Width  | Symmetry | Area%  |
|---|--------|-------|--------|--------|----------|--------|
| 1 | 13.117 | 530.4 | 31.5   | 0.2576 | 0.69     | 47.060 |
| 2 | 17.215 | 596.7 | 22     | 0.4118 | 0.422    | 52.940 |

**2w** 254nm, IB, *n*-Hexane : *i*PrOH 90:10, 0.8 mL/min

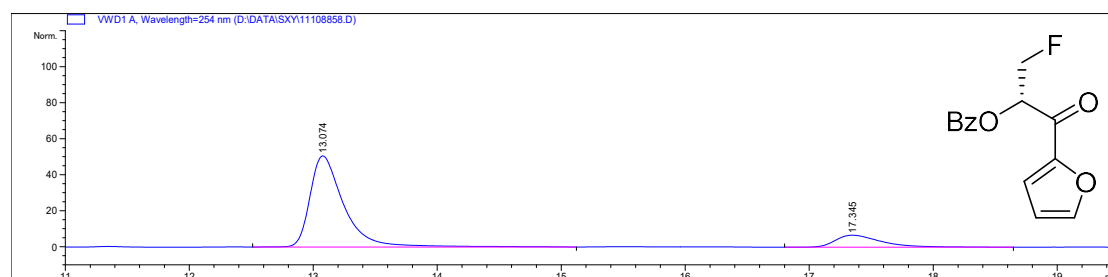

| # | Time   | Area  | Height | Width  | Symmetry | Area%  |
|---|--------|-------|--------|--------|----------|--------|
| 1 | 13.074 | 961.2 | 50.6   | 0.2843 | 0.552    | 84.849 |
| 2 | 17.345 | 171.6 | 6.7    | 0.3885 | 0.552    | 15.151 |

**2x** 254nm, IB, *n*-Hexane : *i*PrOH = 99:1, 0.8 mL/min

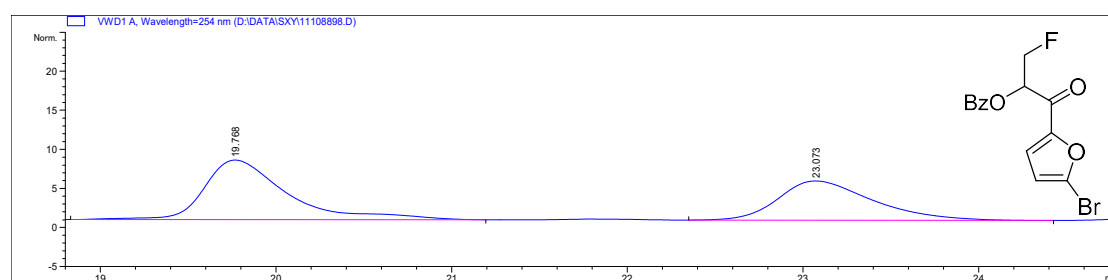

| # | Time   | Area  | Height | Width  | Symmetry | Area%  |
|---|--------|-------|--------|--------|----------|--------|
| 1 | 19.768 | 250.2 | 7.6    | 0.4874 | 0.562    | 57.141 |
| 2 | 23.073 | 187.7 | 5      | 0.548  | 0.632    | 42.859 |

**2x** 254nm, IB, *n*-Hexane : *i*PrOH = 99:1, 0.8 mL/min

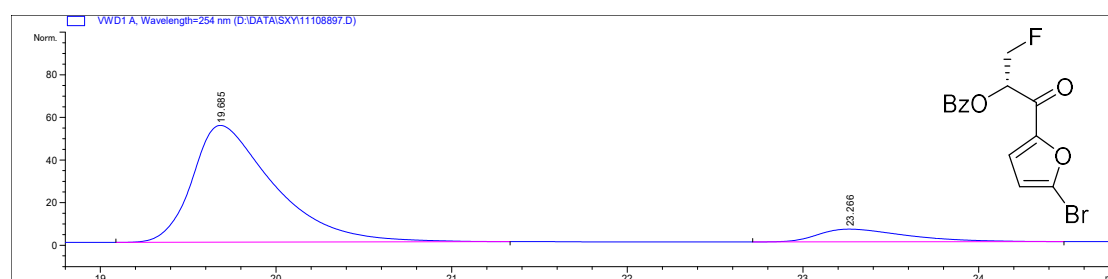

| # | Time   | Area   | Height | Width  | Symmetry | Area%  |
|---|--------|--------|--------|--------|----------|--------|
| 1 | 19.685 | 1769.9 | 54.8   | 0.4713 | 0.498    | 89.581 |
| 2 | 23.266 | 205.9  | 6      | 0.5201 | 0.519    | 10.419 |

**2y** 254nm, IB, *n*-Hexane : *i*PrOH = 90:10, 0.8 mL/min

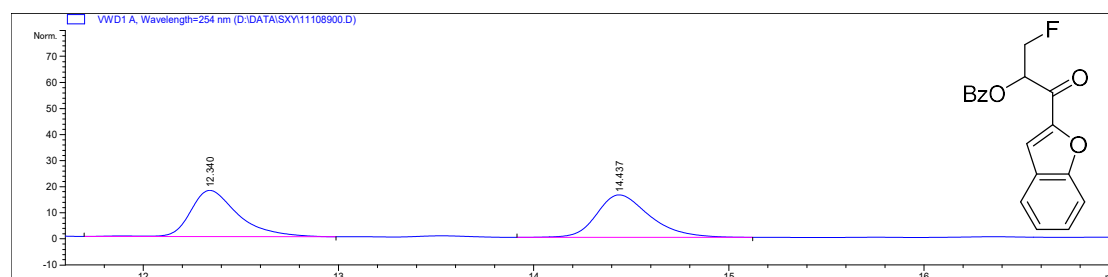

| # | Time   | Area  | Height | Width  | Symmetry | Area%  |
|---|--------|-------|--------|--------|----------|--------|
| 1 | 12.34  | 300.4 | 17.8   | 0.2527 | 0.648    | 49.401 |
| 2 | 14.437 | 307.7 | 16.3   | 0.2842 | 0.709    | 50.599 |

**2y** 254nm, IB, *n*-Hexane : *i*PrOH = 90:10, 0.8 mL/min

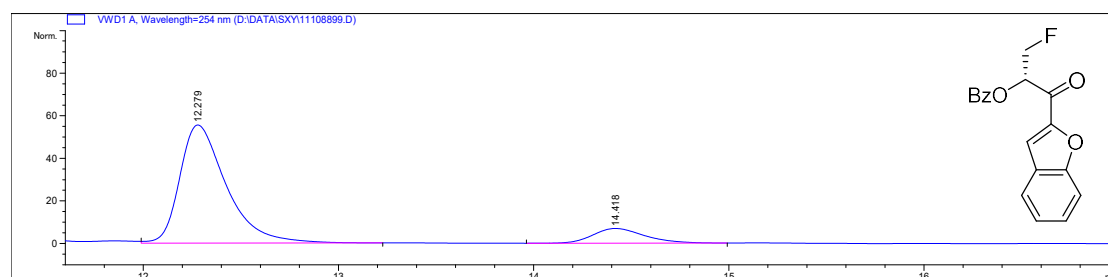

| # | Time   | Area  | Height | Width  | Symmetry | Area%  |
|---|--------|-------|--------|--------|----------|--------|
| 1 | 12.279 | 918.7 | 55.5   | 0.2499 | 0.597    | 87.927 |
| 2 | 14.418 | 126.1 | 6.9    | 0.2784 | 0.749    | 12.073 |

**2z** 254nm, IB, *n*-Hexane : *i*PrOH = 90:10, 0.8 mL/min

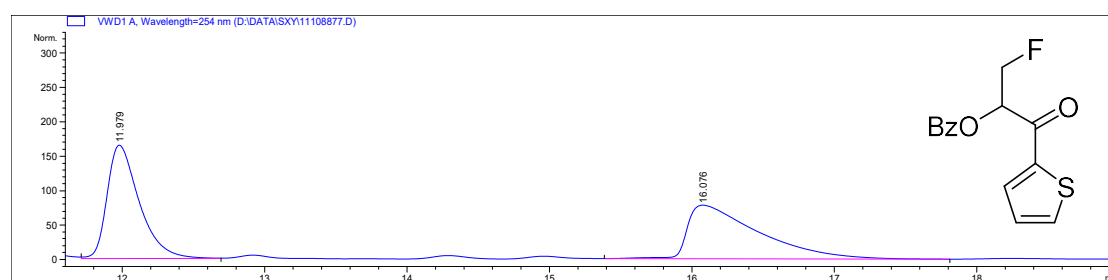

| # | Time   | Area   | Height | Width  | Symmetry | Area%  |
|---|--------|--------|--------|--------|----------|--------|
| 1 | 11.979 | 2586.9 | 164.7  | 0.2371 | 0.574    | 49.020 |
| 2 | 16.076 | 2690.4 | 77.8   | 0.498  | 0.261    | 50.980 |

**2z** 254nm, IB, *n*-Hexane : *i*PrOH = 90:10, 0.8 mL/min

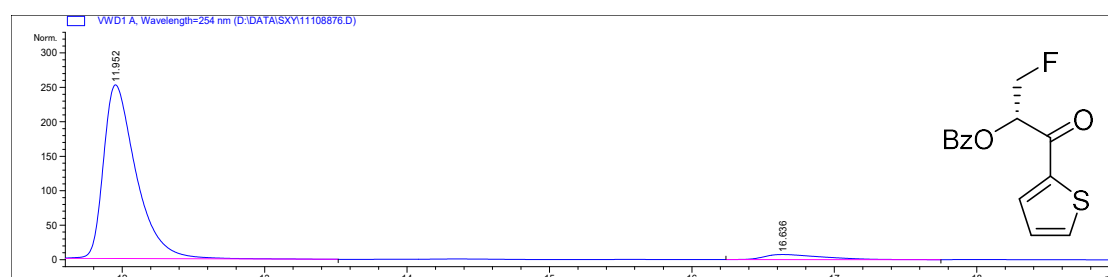

| # | Time   | Area  | Height | Width  | Symmetry | Area%  |
|---|--------|-------|--------|--------|----------|--------|
| 1 | 11.952 | 4012  | 252    | 0.2381 | 0.541    | 95.133 |
| 2 | 16.636 | 205.2 | 7.3    | 0.4126 | 0.424    | 4.867  |

**2a'** 254nm, IB, *n*-Hexane : *i*PrOH = 90:10, 0.8 mL/min

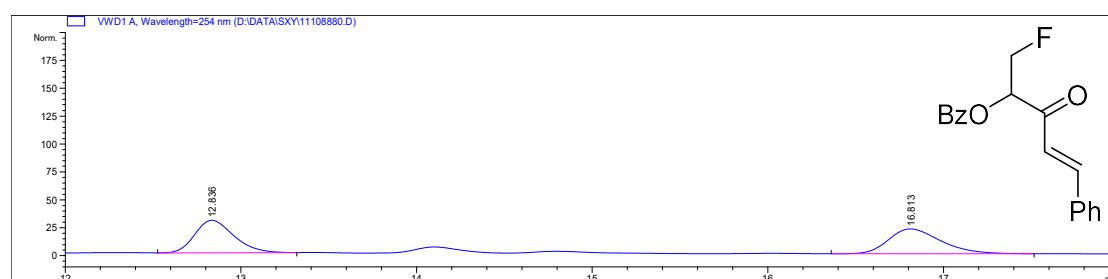

| # | Time   | Area  | Height | Width  | Symmetry | Area%  |
|---|--------|-------|--------|--------|----------|--------|
| 1 | 12.836 | 448.3 | 29.2   | 0.2347 | 0.739    | 49.397 |
| 2 | 16.813 | 459.2 | 22.2   | 0.3165 | 0.693    | 50.603 |

**2a'** 254nm, IB, *n*-Hexane : *i*PrOH = 90:10, 0.8 mL/min

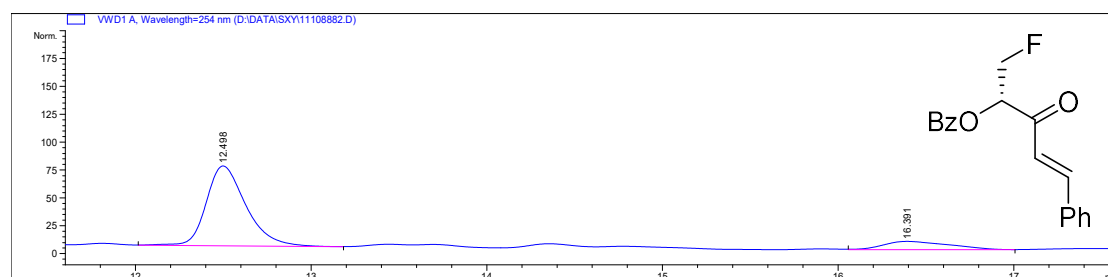

| # | Time   | Area  | Height | Width  | Symmetry | Area%  |
|---|--------|-------|--------|--------|----------|--------|
| 1 | 12.498 | 1129  | 71.7   | 0.2391 | 0.7      | 85.333 |
| 2 | 16.391 | 194.1 | 7.4    | 0.3725 | 0.546    | 14.667 |

**2b'** 254nm, IB, *n*-Hexane : *i*PrOH = 90:10, 0.8 mL/min

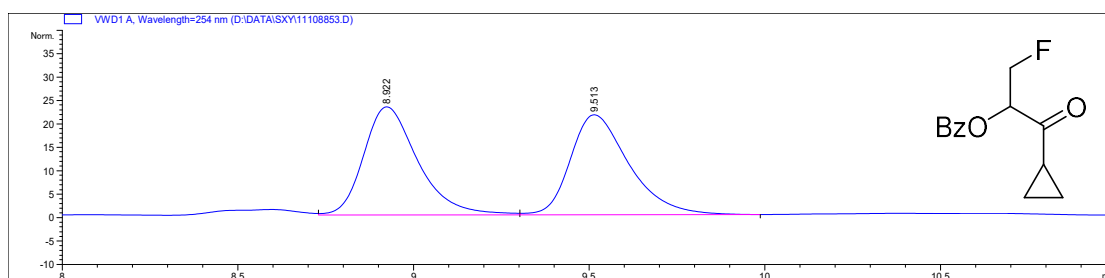

| # | Time  | Area  | Height | Width  | Symmetry | Area%  |
|---|-------|-------|--------|--------|----------|--------|
| 1 | 8.922 | 248.3 | 23.1   | 0.1617 | 0.696    | 50.074 |
| 2 | 9.513 | 247.6 | 21.4   | 0.1745 | 0.653    | 49.926 |

**2b'** 254nm, IB, *n*-Hexane : *i*PrOH = 90:10, 0.8 mL/min

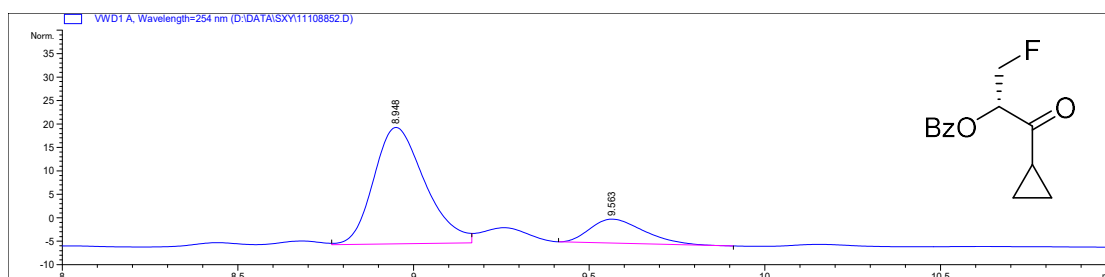

| # | Time  | Area  | Height | Width  | Symmetry | Area%  |
|---|-------|-------|--------|--------|----------|--------|
| 1 | 8.948 | 251.9 | 24.9   | 0.1561 | 0.731    | 82.225 |
| 2 | 9.563 | 54.4  | 5.1    | 0.1668 | 0.641    | 17.775 |

**2c'** 254nm, IB, *n*-Hexane : *i*PrOH = 90:10, 0.8 mL/min

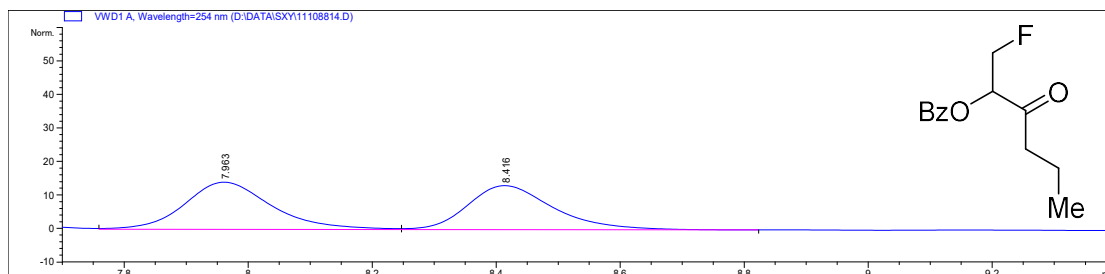

| # | Time  | Area  | Height | Width  | Symmetry | Area%  |
|---|-------|-------|--------|--------|----------|--------|
| 1 | 7.963 | 138.1 | 14.1   | 0.1478 | 0.797    | 52.301 |
| 2 | 8.416 | 125.9 | 13.2   | 0.1452 | 0.72     | 47.699 |

**2c'** 254nm, IB, *n*-Hexane : *i*PrOH = 90:10, 0.8 mL/min

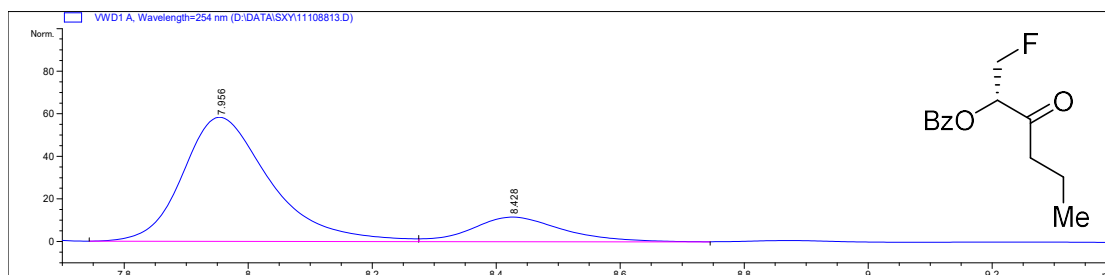

| # | Time  | Area | Height | Width  | Symmetry | Area%  |
|---|-------|------|--------|--------|----------|--------|
| 1 | 7.956 | 571  | 58.3   | 0.1477 | 0.694    | 82.879 |
| 2 | 8.428 | 118  | 11.6   | 0.154  | 0.767    | 17.121 |

**2d'** 254nm, IB, *n*-Hexane : *i*PrOH = 99:1, 0.8 mL/min

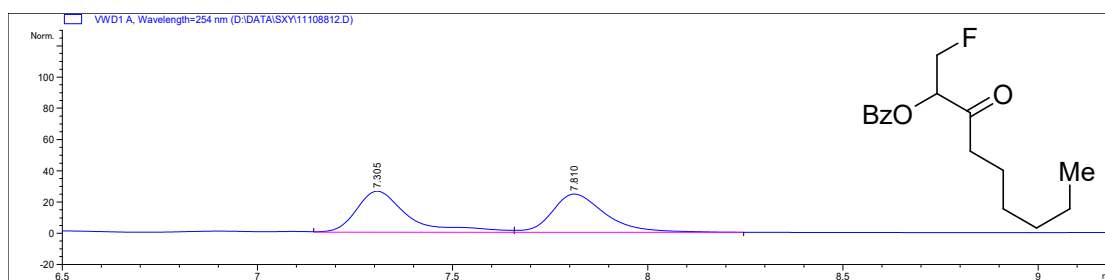

| # | Time  | Area  | Height | Width  | Symmetry | Area%  |
|---|-------|-------|--------|--------|----------|--------|
| 1 | 7.305 | 243.8 | 26.3   | 0.1386 | 0.607    | 51.423 |
| 2 | 7.81  | 230.3 | 24.5   | 0.1417 | 0.679    | 48.577 |

**2d'** 254nm, IB, *n*-Hexane : *i*PrOH = 99:1, 0.8 mL/min

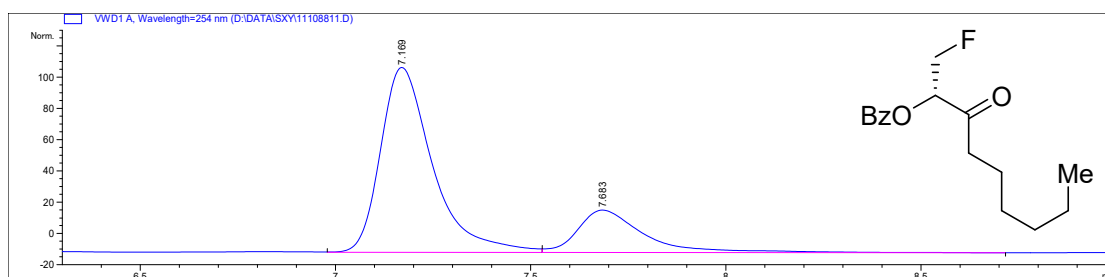

| # | Time  | Area   | Height | Width  | Symmetry | Area%  |
|---|-------|--------|--------|--------|----------|--------|
| 1 | 7.169 | 1095.4 | 118.4  | 0.14   | 0.636    | 77.189 |
| 2 | 7.683 | 323.7  | 27.1   | 0.1758 | 0.541    | 22.811 |

**2e'** 254nm, IB, *n*-Hexane : *i*PrOH = 90:10, 0.8 mL/min

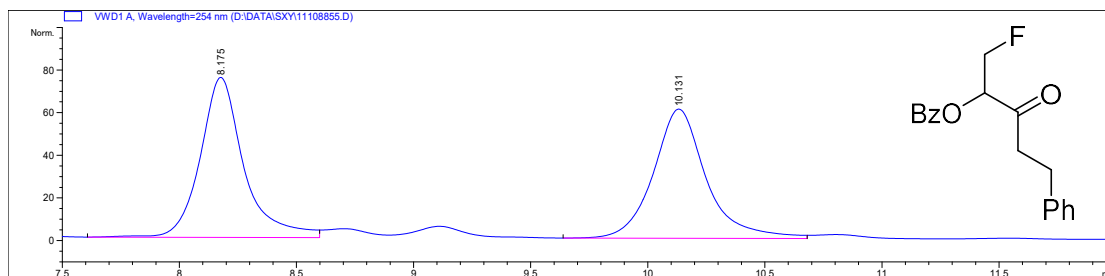

| # | Time   | Area  | Height | Width  | Symmetry | Area%  |
|---|--------|-------|--------|--------|----------|--------|
| 1 | 8.175  | 974.1 | 75.1   | 0.1892 | 0.829    | 50.478 |
| 2 | 10.131 | 955.7 | 60.7   | 0.2304 | 0.867    | 49.522 |

**2e'** 254nm, IB, *n*-Hexane : *i*PrOH = 90:10, 0.8 mL/min

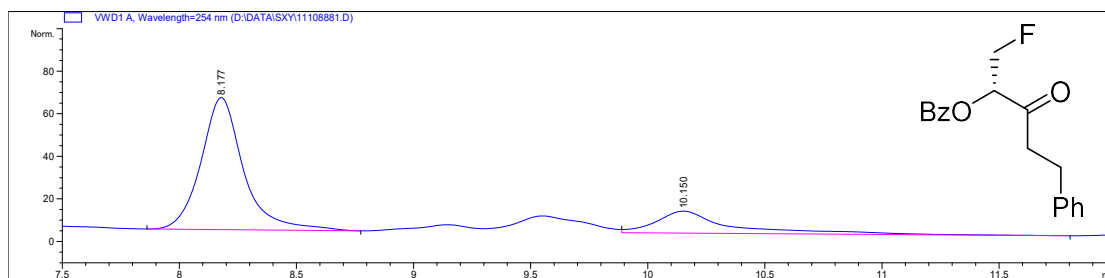

| # | Time  | Area  | Height | Width  | Symmetry | Area%  |
|---|-------|-------|--------|--------|----------|--------|
| 1 | 8.177 | 784.4 | 62.1   | 0.1867 | 0.843    | 77.064 |
| 2 | 10.15 | 233.5 | 10.3   | 0.315  | 0.497    | 22.936 |



2f 254nm, IA, n-hexane:i-PrOH= 90:10, 0.8 mL/min

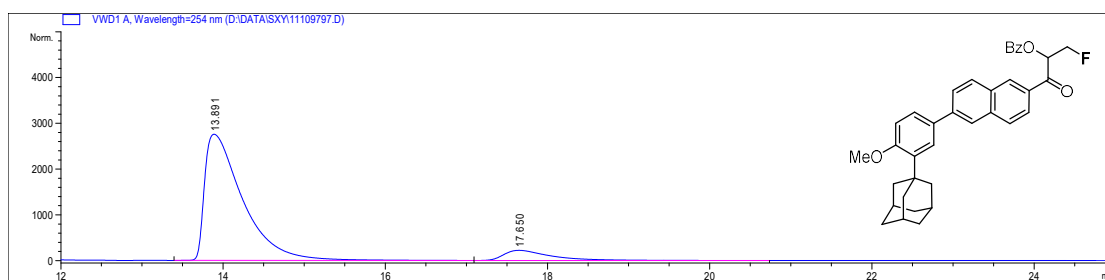

| # | Time   | Area    | Height | Width  | Symmetry | Area%  |
|---|--------|---------|--------|--------|----------|--------|
| 1 | 13.891 | 89989.3 | 2756.5 | 0.4843 | 0.298    | 90.939 |
| 2 | 17.65  | 8966.4  | 221.1  | 0.5941 | 0.425    | 9.061  |

2f 254nm, IA, n-hexane:i-PrOH= 90:10, 0.8 mL/min

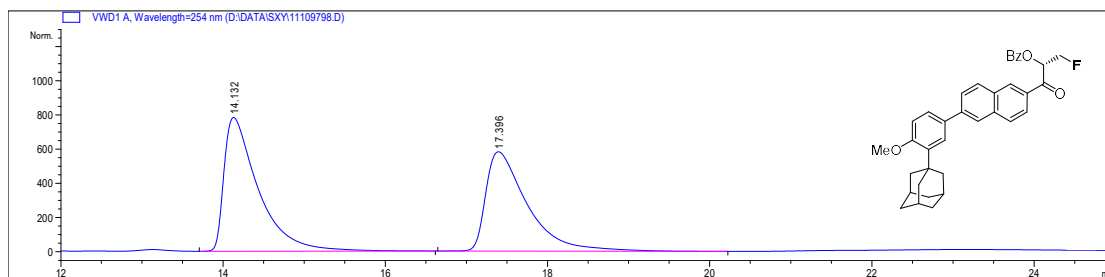

| # | Time   | Area    | Height | Width  | Symmetry | Area%  |
|---|--------|---------|--------|--------|----------|--------|
| 1 | 14.132 | 22935.9 | 782.1  | 0.4266 | 0.354    | 52.721 |
| 2 | 17.396 | 20568.6 | 580.4  | 0.5256 | 0.399    | 47.279 |

3 254nm, IA, n-Hexane : i-PrOH = 90:10, 0.4 mL/min

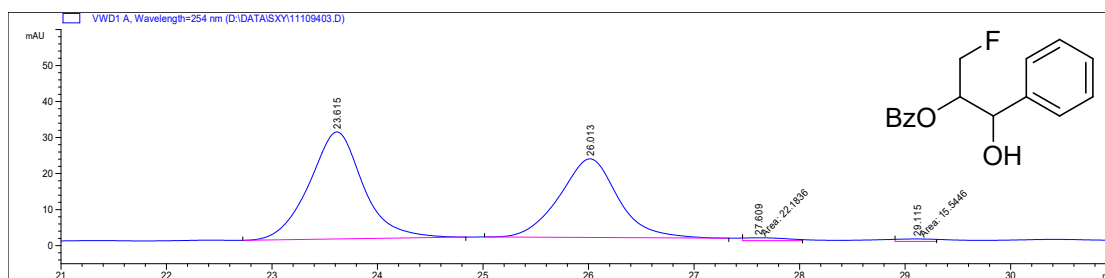

| # | Time   | Area   | Height | Width  | Symmetry | Area%  |
|---|--------|--------|--------|--------|----------|--------|
| 1 | 23.615 | 1054.2 | 29.7   | 0.5261 | 1.006    | 54.507 |
| 2 | 26.013 | 842.1  | 21.8   | 0.5709 | 1.036    | 43.542 |
| 3 | 27.609 | 22.2   | 8E-1   | 0.4644 | 0.447    | 1.147  |
| 4 | 29.115 | 15.5   | 7E-1   | 0.3686 | 1.129    | 0.804  |

3 254nm, IA, n-hexane:i-PrOH= 90:10, 0.4 mL/min

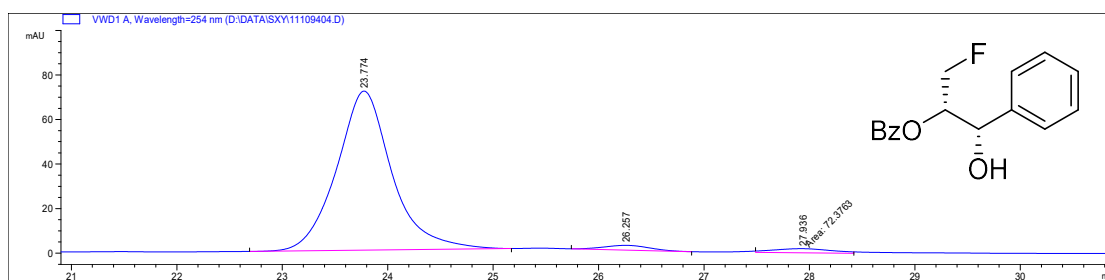

| # | Time   | Area   | Height | Width  | Symmetry | Area%  |
|---|--------|--------|--------|--------|----------|--------|
| 1 | 23.774 | 2607.4 | 71.4   | 0.5322 | 0.932    | 95.050 |
| 2 | 26.257 | 63.4   | 2.1    | 0.4437 | 0.906    | 2.312  |
| 3 | 27.936 | 72.4   | 1.9    | 0.6429 | 0        | 2.638  |

4 254nm, IA, n-hexane:i-PrOH= 90:10, 0.4 mL/min

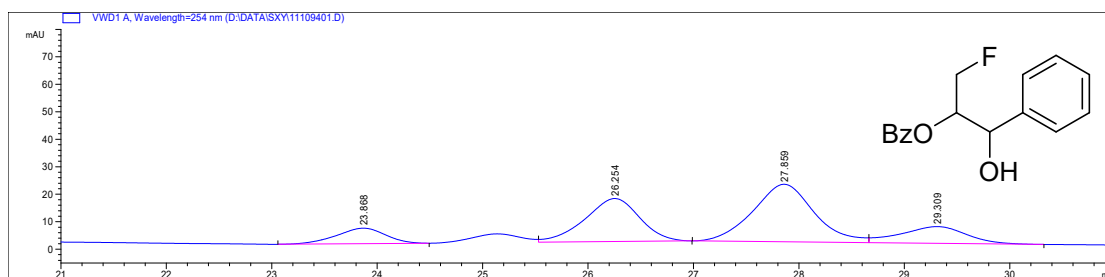

| # | Time   | Area  | Height | Width  | Symmetry | Area%  |
|---|--------|-------|--------|--------|----------|--------|
| 1 | 23.868 | 182.7 | 5.6    | 0.4787 | 1.204    | 9.840  |
| 2 | 26.254 | 565.5 | 15.7   | 0.5422 | 1.197    | 30.459 |
| 3 | 27.859 | 844.6 | 20.9   | 0.5931 | 0.992    | 45.492 |
| 4 | 29.309 | 263.8 | 6.1    | 0.6268 | 1.203    | 14.210 |

4 254nm, IA, n-hexane:i-PrOH= 90:10, 0.4 mL/min

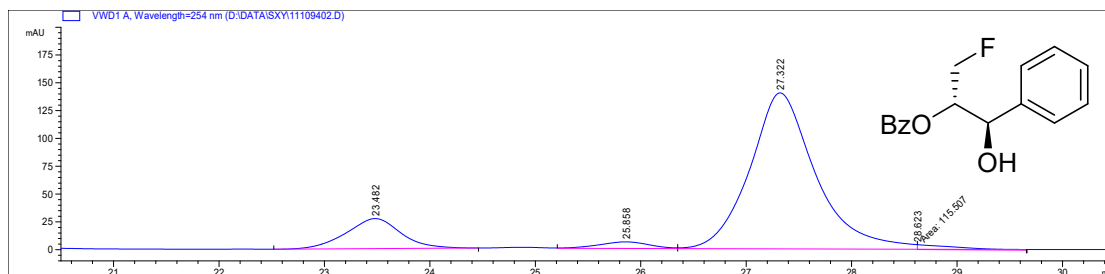

| # | Time   | Area   | Height | Width  | Symmetry | Area%  |
|---|--------|--------|--------|--------|----------|--------|
| 1 | 23.482 | 972.8  | 27     | 0.528  | 1.105    | 13.259 |
| 2 | 25.858 | 193.5  | 5.9    | 0.5002 | 1.132    | 2.637  |
| 3 | 27.322 | 6054.9 | 140.2  | 0.6239 | 0        | 82.530 |
| 4 | 28.623 | 115.5  | 4.3    | 0.3156 | 0        | 1.574  |

5 254nm, IA, n-hexane:i-PrOH= 90:10, 0.8 mL/min

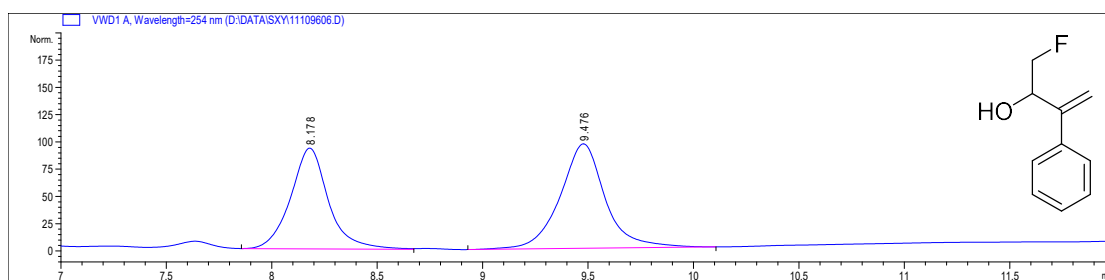

| # | Time  | Area   | Height | Width  | Symmetry | Area%  |
|---|-------|--------|--------|--------|----------|--------|
| 1 | 8.178 | 1154.9 | 92.4   | 0.1851 | 0.952    | 44.697 |
| 2 | 9.476 | 1428.9 | 95.9   | 0.2176 | 1.024    | 55.303 |

5 254nm, IA, n-hexane:i-PrOH= 90:10, 0.8 mL/min

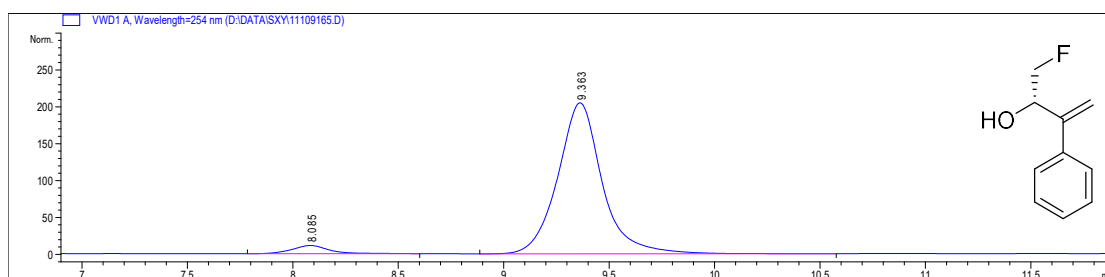

| # | Time  | Area   | Height | Width  | Symmetry | Area%  |
|---|-------|--------|--------|--------|----------|--------|
| 1 | 8.085 | 136    | 11.1   | 0.1811 | 0.936    | 4.339  |
| 2 | 9.363 | 2998.7 | 204.6  | 0.2161 | 0.944    | 95.661 |

6 254nm, IB, n-Hexane : iPrOH = 90:10, 0.8 mL/min

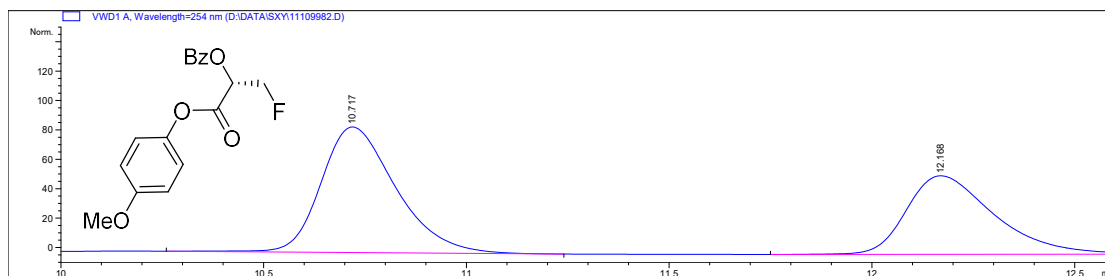

| # | Time  | Area   | Height | Width  | Symmetry | Area%  |
|---|-------|--------|--------|--------|----------|--------|
| 1 | 8.085 | 136    | 11.1   | 0.1811 | 0.936    | 4.339  |
| 2 | 9.363 | 2998.7 | 204.6  | 0.2161 | 0.944    | 95.661 |

6 254nm, IB, n-Hexane : iPrOH = 90:10, 0.8 mL/min

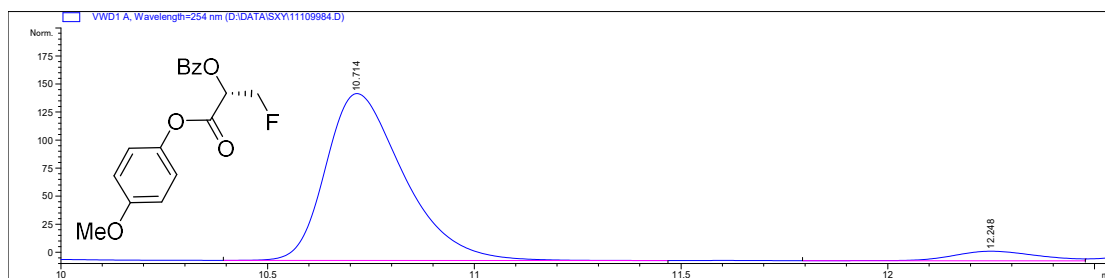

| # | Time  | Area   | Height | Width  | Symmetry | Area%  |
|---|-------|--------|--------|--------|----------|--------|
| 1 | 8.085 | 136    | 11.1   | 0.1811 | 0.936    | 4.339  |
| 2 | 9.363 | 2998.7 | 204.6  | 0.2161 | 0.944    | 95.661 |

## 12 X-Ray Crystallographic Data

The X-ray crystallographic structure for (Brominated fluoroethanol benzoate (**BFEB**)). Crystal data has been deposited to CCDC, number 2250621.

In a 5 mL glass vial, **BFEB** (50.0 mg) was dissolved in 1 mL of DCM, and 2 mL of hexane was slowly added along the inner wall of the glass vial, and the interface between the two phases was obvious. A needle-like solid was precipitated after 24 h of standing at room temperature and subjected to X-ray analysis.

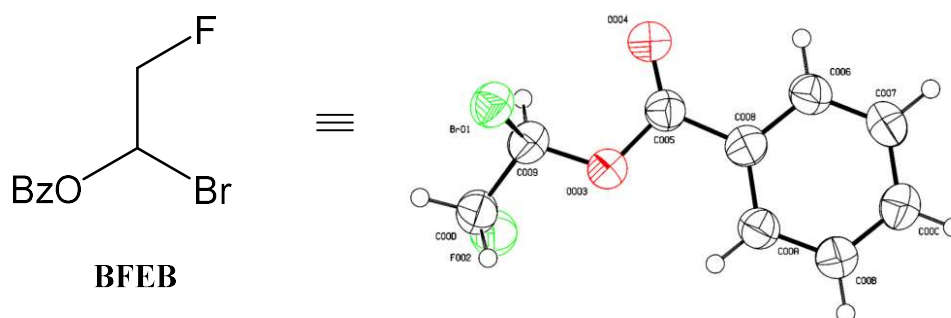

**Table S2.** Crystal data and structure refinement for **BFEB**.

|                                    |                                                 |
|------------------------------------|-------------------------------------------------|
| Empirical formula                  | C <sub>9</sub> H <sub>8</sub> BrFO <sub>2</sub> |
| Formula weight                     | 247.26                                          |
| Temperature/K                      | 150.00                                          |
| Crystal system                     | monoclinic                                      |
| Space group                        | P2 <sub>1</sub>                                 |
| a/Å                                | 4.3286(2)                                       |
| b/Å                                | 11.3274(6)                                      |
| c/Å                                | 9.4733(5)                                       |
| α/°                                | 90                                              |
| β/°                                | 91.124(2)                                       |
| γ/°                                | 90                                              |
| Volume/Å <sup>3</sup>              | 464.40(4)                                       |
| Z                                  | 2                                               |
| ρ <sub>calc</sub> /cm <sup>3</sup> | 1.767                                           |
| μ/mm <sup>-1</sup>                 | 5.909                                           |

|                                             |                                       |
|---------------------------------------------|---------------------------------------|
| F(000)                                      | 244.0                                 |
| Crystal size/mm <sup>3</sup>                | 0.2 × 0.15 × 0.1                      |
| Radiation                                   | CuKα (λ = 1.54178)                    |
| 2θ range for data collection/°              | 12.18 to 144.178                      |
| Index ranges                                | -5 ≤ h ≤ 5, -9 ≤ k ≤ 13, -11 ≤ l ≤ 10 |
| Reflections collected                       | 3009                                  |
| Independent reflections                     | 1296 [Rint = 0.0382, Rsigma = 0.0568] |
| Data/restraints/parameters                  | 1296/1/118                            |
| Goodness-of-fit on F <sup>2</sup>           | 1.161                                 |
| Final R indexes [I ≥ 2σ (I)]                | R1 = 0.0418, wR2 = 0.0906             |
| Final R indexes [all data]                  | R1 = 0.0419, wR2 = 0.0907             |
| Largest diff. peak/hole / e Å <sup>-3</sup> | 0.66/-0.40                            |

The X-ray crystallographic structure for (*S*)-3-fluoro-1-oxo-1-phenylpropan-2-yl benzoate (**2a**). Crystal data has been deposited to CCDC, number 2336970.

The compound **2a** (20.0 mg) was dissolved in CH<sub>2</sub>Cl<sub>2</sub> (0.3 mL), then n-Hexane (1.2 mL) was added slowly, and the mixture was allowed to stand at -20°C. The single crystal of the target compound was obtained after several days and subjected to X-ray analysis.

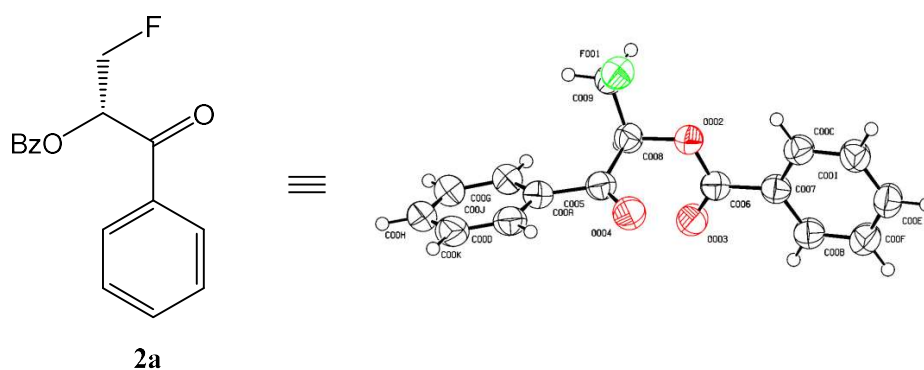

**Table S3.** Crystal data and structure refinement for **2a**.

|                     |                                                 |
|---------------------|-------------------------------------------------|
| Identification code | cu_0103_6_0m                                    |
| Empirical formula   | C <sub>16</sub> H <sub>13</sub> FO <sub>3</sub> |
| Formula weight      | 272.26                                          |
| Temperature/K       | 150.00                                          |
| Crystal system      | orthorhombic                                    |
| Space group         | P2 <sub>1</sub> 2 <sub>1</sub> 2 <sub>1</sub>   |
| a/Å                 | 6.65300(10)                                     |
| b/Å                 | 13.5440(3)                                      |
| c/Å                 | 15.3370(4)                                      |

|                                               |                                                               |
|-----------------------------------------------|---------------------------------------------------------------|
| $\alpha/^\circ$                               | 90                                                            |
| $\beta/^\circ$                                | 90                                                            |
| $\gamma/^\circ$                               | 90                                                            |
| Volume/ $\text{\AA}^3$                        | 1381.99(5)                                                    |
| Z                                             | 4                                                             |
| $\rho_{\text{calc}}/\text{g/cm}^3$            | 1.309                                                         |
| $\mu/\text{mm}^{-1}$                          | 0.827                                                         |
| F(000)                                        | 568.0                                                         |
| Crystal size/ $\text{mm}^3$                   | $0.2 \times 0.15 \times 0.1$                                  |
| Radiation                                     | CuK $\alpha$ ( $\lambda = 1.54178$ )                          |
| $2\theta$ range for data collection/ $^\circ$ | 8.71 to 149.06                                                |
| Index ranges                                  | $-8 \leq h \leq 8, -16 \leq k \leq 16, -18 \leq l \leq 15$    |
| Reflections collected                         | 16491                                                         |
| Independent reflections                       | 2812 [ $R_{\text{int}} = 0.0296, R_{\text{sigma}} = 0.0219$ ] |
| Data/restraints/parameters                    | 2812/0/181                                                    |
| Goodness-of-fit on $F^2$                      | 1.147                                                         |
| Final R indexes [ $I \geq 2\sigma(I)$ ]       | $R_1 = 0.0585, wR_2 = 0.1284$                                 |
| Final R indexes [all data]                    | $R_1 = 0.0592, wR_2 = 0.1296$                                 |
| Largest diff. peak/hole / $e \text{\AA}^{-3}$ | 0.37/-0.14                                                    |
| Flack parameter                               | -0.01(5)                                                      |

The X-ray crystallographic structure for (1*S*,2*S*)-3-fluoro-1-hydroxy-1-phenylpropan-2-yl benzoate (**3**). Crystal data has been deposited to CCDC, number 2336972.

The compound **3** (17.0 mg) was dissolved in  $\text{CH}_2\text{Cl}_2$  (0.3 mL), then n-Hexane (1.2 mL) was added slowly, and the mixture was allowed to stand at  $-20^\circ\text{C}$ . The single crystal of the target compound was obtained after several days and subjected to X-ray analysis.

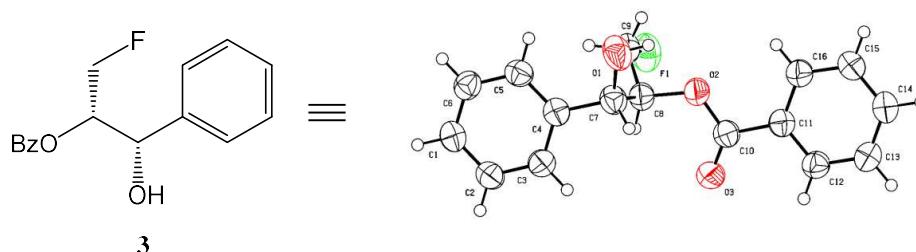

**Table S4.** Crystal data and structure refinement for **3**.

|                     |                                         |
|---------------------|-----------------------------------------|
| Identification code | cu_0117_3_0m                            |
| Empirical formula   | $\text{C}_{16}\text{H}_{15}\text{FO}_3$ |
| Formula weight      | 274.28                                  |

---

|                                             |                                                               |
|---------------------------------------------|---------------------------------------------------------------|
| Temperature/K                               | 150.00                                                        |
| Crystal system                              | orthorhombic                                                  |
| Space group                                 | P2 <sub>1</sub> 2 <sub>1</sub> 2 <sub>1</sub>                 |
| a/Å                                         | 5.6714(2)                                                     |
| b/Å                                         | 7.3732(2)                                                     |
| c/Å                                         | 32.2276(8)                                                    |
| $\alpha$ /°                                 | 90                                                            |
| $\beta$ /°                                  | 90                                                            |
| $\gamma$ /°                                 | 90                                                            |
| Volume/Å <sup>3</sup>                       | 1347.64(7)                                                    |
| Z                                           | 4                                                             |
| $\rho_{\text{calc}}$ /cm <sup>3</sup>       | 1.352                                                         |
| $\mu$ /mm <sup>-1</sup>                     | 0.848                                                         |
| F(000)                                      | 576.0                                                         |
| Crystal size/mm <sup>3</sup>                | 0.2 × 0.15 × 0.1                                              |
| Radiation                                   | CuK $\alpha$ ( $\lambda$ = 1.54178)                           |
| 2 $\Theta$ range for data collection/°      | 10.982 to 149.236                                             |
| Index ranges                                | -6 ≤ h ≤ 7, -9 ≤ k ≤ 9, -31 ≤ l ≤ 40                          |
| Reflections collected                       | 10963                                                         |
| Independent reflections                     | 2739 [R <sub>int</sub> = 0.0276, R <sub>sigma</sub> = 0.0254] |
| Data/restraints/parameters                  | 2739/0/182                                                    |
| Goodness-of-fit on F <sup>2</sup>           | 1.113                                                         |
| Final R indexes [I ≥ 2 $\sigma$ (I)]        | R <sub>1</sub> = 0.0649, wR <sub>2</sub> = 0.1442             |
| Final R indexes [all data]                  | R <sub>1</sub> = 0.0659, wR <sub>2</sub> = 0.1461             |
| Largest diff. peak/hole / e Å <sup>-3</sup> | 0.37/-0.22                                                    |
| Flack parameter                             | 0.06(6)                                                       |

---

## 13 Computational Results

**13.1 Computational Details:** All the calculations were performed using Gaussian 09 package<sup>[1]</sup>. The geometry optimizations were carried out using (u)B3LYP-D3(BJ)<sup>[2]</sup> functional with a mixed basis set of SDD for Ni and Br and 6-31G(*d*) for all other atoms. Frequencies were computed analytically at the same level of theory to confirm whether the structures are minima (no imaginary frequencies) or transition states (only one imaginary frequency). Selected transition-state structures were confirmed to connect the correct reactants and products by intrinsic reaction coordinate (IRC) calculations.<sup>[3]</sup> To obtain better accuracy, solution-phase single-point energies for the optimized geometries were recalculated using (u)TPSS-D3(BJ)<sup>[4]</sup> functional with a larger basis set of def2-TZVPP<sup>[5,6]</sup>. Solvation effects (solvent=THF) were taken into account by performing single-point calculations with the SMD model<sup>[7]</sup>. The final free energies reported in the article are the large basis set single-point energies corrected by gas-phase Gibbs free energy correction (at 298.15 K). The 3D diagrams of molecules were generated using CYLView<sup>[8]</sup>. Non-covalent interactions<sup>[9]</sup> were performed with Multiwfn<sup>[10]</sup>, and were visualized with visual molecular dynamics (VMD)<sup>[11]</sup>.

1. M. J. Frisch, et al. Gaussian 09, Revision E.01; Gaussian, Inc.: Wallingford, CT, 2013.
2. (a) C. Lee, W. Yang, R. G. Parr, *Phys. Rev. B.*, 1988, **37**, 785–789. (b) A. D. Becke, *J. Chem. Phys.*, 1993, **98**, 5648–5652. (c) S. Grimme, J. Antony, S. Ehrlich, H. Krieg, *J. Chem. Phys.*, 2010, **132**, 154104.
3. (a) K. Fukui, *J. Phys. Chem.*, 1970, **74**, 4161–4163. (b) K. Fukui, *Acc. Chem. Res.*, 1981, **14**, 363–368.
4. (a) S. Dohm, A. Hansen, M. Steinmetz, S. Grimme, M. P. Checinski, *J. Chem. Theory Comput.*, 2018, **14**, 2596–2608. (b) W. Wang, X. Yan, F. Ye, S. Zheng, G. Huang, W. Yuan, *J. Am. Chem. Soc.*, 2023, **145**, 23385–23394.
5. F. Weigend, R. Ahlrichs, *Phys. Chem. Chem. Phys.*, 2005, **7**, 3297–3305.
6. F. Weigend, *Phys. Chem. Chem. Phys.*, 2006, **8**, 1057–1065.
7. A. V. Marenich, C. J. Cramer, D. G. Truhlar, *J. Phys. Chem. B.*, 2009, **113**, 6378–6396.
8. C. Y. Legault, *CYLview* 1.0b, Université de Sherbrooke: <http://www.cylview.org> 2009.
9. (a) C. Bissantz, B. Kuhn, M. Stahl, *J. Med. Chem.*, 2010, **53**, 5061–5084; (b) A. J. Neel, M. J. Hilton, M. S. Sigman, F. D. Toste, *Nature*, 2017, **543**, 637–646.
10. T. Lu, F. Chen, *J. Comput. Chem.*, 2012, **33**, 580–592.
11. W. Humphrey, A. Dalke, K. Schulten, *J. Mol. Graph.*, 1996, **14**, 33–38.



### 13.2. Figure S8 DFT-computed energy profiles of the competitive fluorine elimination

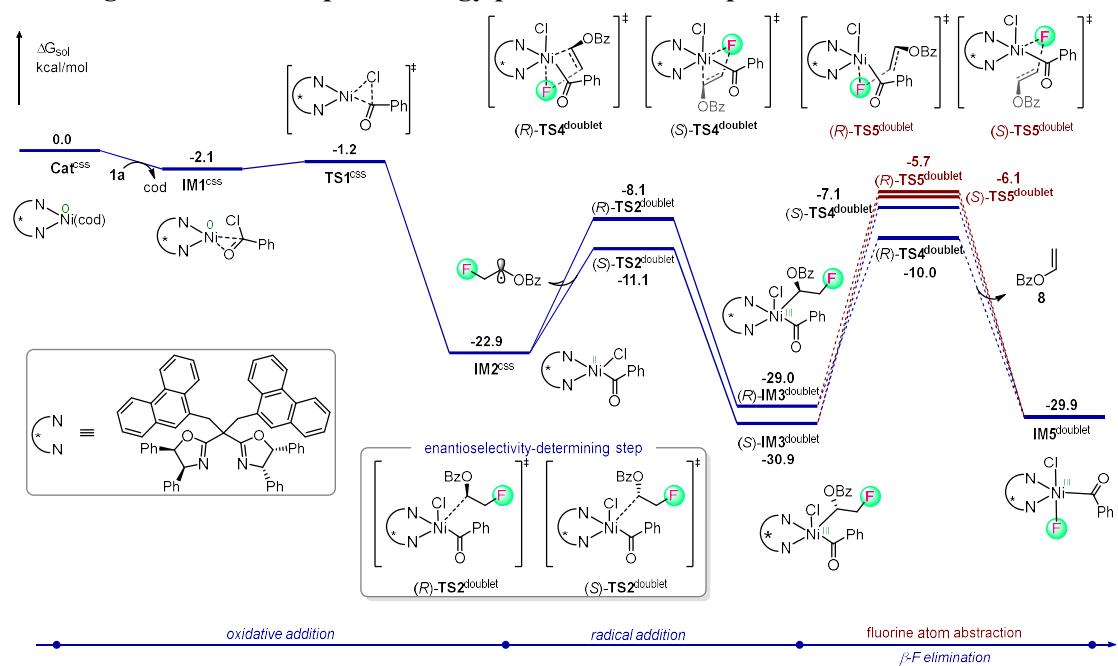

### 13.3 Table S5 of Calculated Energies and Energy Corrections

| Stationary point                           | Single-point energy-(u)TPSS-D3(BJ)-SMD def2-TZVPP (a.u.) | Thermal correction to Gibbs free energy at 298.15 K (a.u.) |
|--------------------------------------------|----------------------------------------------------------|------------------------------------------------------------|
| <b>1a</b>                                  | -805.446056                                              | 0.068432                                                   |
| <b>radical</b>                             | -598.381081                                              | 0.112394                                                   |
| <b>cod</b>                                 | -312.232002                                              | 0.149973                                                   |
| ( <i>R</i> )- <b>2</b>                     | -943.636490                                              | 0.208580                                                   |
| ( <i>S</i> )- <b>2</b>                     | -943.636490                                              | 0.208580                                                   |
| <b>Cat<sup>css</sup></b>                   | -4434.608418                                             | 0.995710                                                   |
| <b>IM1<sup>css</sup></b>                   | -4927.825472                                             | 0.913791                                                   |
| <b>IM2<sup>css</sup></b>                   | -4927.858167                                             | 0.913415                                                   |
| ( <i>R</i> )- <b>IM3<sup>doublet</sup></b> | -5526.274827                                             | 1.051548                                                   |
| ( <i>S</i> )- <b>IM3<sup>doublet</sup></b> | -5526.281251                                             | 1.055094                                                   |
| <b>IM4<sup>doublet</sup></b>               | -4582.640173                                             | 0.818450                                                   |
| <b>IM5<sup>doublet</sup></b>               | -5027.728981                                             | 0.911238                                                   |
| <b>TS1<sup>css</sup></b>                   | -4927.823528                                             | 0.913334                                                   |
| ( <i>R</i> )- <b>TS2<sup>doublet</sup></b> | -5526.241520                                             | 1.051679                                                   |
| ( <i>S</i> )- <b>TS2<sup>doublet</sup></b> | -5526.246315                                             | 1.051611                                                   |
| ( <i>R</i> )- <b>TS3<sup>doublet</sup></b> | -5526.261407                                             | 1.051925                                                   |
| ( <i>S</i> )- <b>TS3<sup>doublet</sup></b> | -5526.263208                                             | 1.055483                                                   |
| ( <i>R</i> )- <b>TS4<sup>doublet</sup></b> | -5526.242464                                             | 1.049579                                                   |
| ( <i>S</i> )- <b>TS4<sup>doublet</sup></b> | -5526.238836                                             | 1.050565                                                   |
| ( <i>R</i> )- <b>TS5<sup>doublet</sup></b> | -5526.237198                                             | 1.051056                                                   |
| ( <i>S</i> )- <b>TS5<sup>doublet</sup></b> | -5526.238194                                             | 1.051425                                                   |

### 13.4 Cartesian coordinates

#### 1a

|    |             |             |             |
|----|-------------|-------------|-------------|
| C  | 1.08690400  | 0.39512300  | -0.04968800 |
| C  | 2.45935600  | 0.40690500  | 0.20751100  |
| C  | 3.14939300  | 1.61480400  | 0.27611300  |
| C  | 2.46117300  | 2.82049900  | 0.08625800  |
| C  | 1.07902500  | 2.80571600  | -0.17228500 |
| C  | 0.39730200  | 1.59618700  | -0.23944800 |
| H  | 0.55392800  | -0.54986400 | -0.10252300 |
| H  | 2.99409300  | -0.52628600 | 0.35503300  |
| H  | 4.21362300  | 1.62680700  | 0.47566300  |
| H  | 0.56354700  | 3.74864800  | -0.31608700 |
| H  | -0.66982600 | 1.58727900  | -0.43935800 |
| C  | 3.09980300  | 4.15430600  | 0.13939900  |
| O  | 2.55384300  | 5.20505200  | -0.01527200 |
| Cl | 4.90065600  | 4.14300800  | 0.47662700  |

**radical**

|   |             |             |             |
|---|-------------|-------------|-------------|
| C | 2.24180000  | -1.71164100 | 0.34841100  |
| C | 1.38143600  | -0.86889900 | -0.49931900 |
| H | 3.29537600  | -1.50362700 | 0.13414500  |
| H | 2.04211100  | -1.52490400 | 1.40984900  |
| H | 1.58087000  | -0.60120900 | -1.52832700 |
| F | 2.02247200  | -3.08489100 | 0.11804700  |
| O | 0.09753400  | -0.71948900 | -0.06409800 |
| C | -0.80399700 | -0.08292300 | -0.89184200 |
| O | -0.49320600 | 0.34684400  | -1.98119400 |
| C | -2.14764800 | -0.00347600 | -0.27900800 |
| C | -2.43312500 | -0.54363500 | 0.98328700  |
| C | -3.15701800 | 0.63825600  | -1.01105800 |
| C | -3.72023900 | -0.43882100 | 1.50499800  |
| H | -1.65062900 | -1.04131500 | 1.54359700  |
| C | -4.44081900 | 0.74013000  | -0.48436400 |
| H | -2.91292900 | 1.04670000  | -1.98567000 |
| C | -4.72367800 | 0.20187300  | 0.77403100  |
| H | -3.94180000 | -0.85780000 | 2.48203800  |
| H | -5.22133900 | 1.23749200  | -1.05236200 |
| H | -5.72626500 | 0.28111100  | 1.18471700  |

**cod**

|   |             |             |             |
|---|-------------|-------------|-------------|
| C | -1.57280000 | 0.61698000  | -0.27206200 |
| C | 0.67855000  | 1.79766200  | -0.04200400 |
| C | 1.57325400  | 0.69233700  | -0.54300300 |
| C | 1.57336400  | -0.61702600 | -0.26887600 |
| C | 0.64787000  | -1.39770500 | 0.63553900  |
| C | -1.57216500 | -0.69241800 | -0.54600800 |
| H | -2.31886500 | 1.22013100  | -0.78977800 |
| H | 2.33789600  | 1.04095000  | -1.23863600 |
| H | 2.32049600  | -1.22021900 | -0.78500100 |
| H | -2.33540800 | -1.04111900 | -1.24313100 |
| C | -0.64908500 | 1.39774400  | 0.63408900  |
| C | -0.67847900 | -1.79767400 | -0.04304200 |
| H | 1.25170900  | 2.43270500  | 0.65225600  |
| H | 0.44617800  | 2.44790300  | -0.89790400 |
| H | -0.44945100 | 0.85928900  | 1.56285600  |
| H | -1.15684200 | 2.32285400  | 0.93326100  |
| H | -1.25300700 | -2.43254000 | 0.65024900  |
| H | -0.44449400 | -2.44811500 | -0.89834800 |
| H | 1.15503100  | -2.32280300 | 0.93575500  |
| H | 0.44647600  | -0.85918300 | 1.56389300  |

(R)-2

|   |             |             |             |
|---|-------------|-------------|-------------|
| C | 1.68077300  | 1.84158700  | 0.10158400  |
| C | 0.77496000  | 0.68623400  | -0.29468000 |
| H | 2.73183700  | 1.55471700  | -0.01351900 |
| H | 1.48966600  | 2.11606900  | 1.14455400  |
| H | 0.82488600  | 0.52486500  | -1.37392900 |
| F | 1.42579500  | 2.93555900  | -0.70809500 |
| O | -0.55066500 | 1.06884800  | 0.05722300  |
| C | -1.52540900 | 0.24912500  | -0.41566700 |
| O | -1.28564700 | -0.70956300 | -1.12342100 |
| C | -2.87967700 | 0.67195000  | 0.01637500  |
| C | -3.97154500 | -0.08870400 | -0.42158100 |
| C | -3.08648900 | 1.78892100  | 0.83652200  |
| C | -5.26299800 | 0.26618500  | -0.04305900 |
| H | -3.78429500 | -0.95010600 | -1.05344900 |
| C | -4.38114200 | 2.14036500  | 1.21234500  |
| H | -2.23579300 | 2.36965000  | 1.17289700  |
| C | -5.46871900 | 1.38113900  | 0.77393900  |
| H | -6.10895200 | -0.32426200 | -0.38246100 |
| H | -4.54255100 | 3.00585700  | 1.84823400  |
| H | -6.47684000 | 1.65781800  | 1.06981800  |
| C | 1.17980800  | -0.59282700 | 0.46316700  |
| O | 0.58634200  | -0.89443000 | 1.48310200  |
| C | 2.33495300  | -1.38772900 | -0.04169900 |
| C | 3.00633200  | -1.09779700 | -1.23970400 |
| C | 2.76254700  | -2.47465300 | 0.73771100  |
| C | 4.08688200  | -1.87914800 | -1.64614700 |
| H | 2.69101700  | -0.27201200 | -1.86841400 |
| C | 3.83903000  | -3.25392600 | 0.33009400  |
| H | 2.22944200  | -2.68508200 | 1.65845600  |
| C | 4.50444400  | -2.95636800 | -0.86318000 |
| H | 4.59870100  | -1.64949900 | -2.57587000 |
| H | 4.16234400  | -4.09336000 | 0.93861700  |
| H | 5.34548900  | -3.56498800 | -1.18296400 |

(S)-2

|   |             |            |             |
|---|-------------|------------|-------------|
| C | 1.68077300  | 1.84158700 | -0.10158400 |
| C | 0.77496000  | 0.68623400 | 0.29468000  |
| H | 2.73183700  | 1.55471700 | 0.01351900  |
| H | 1.48966600  | 2.11606900 | -1.14455400 |
| H | 0.82488600  | 0.52486500 | 1.37392900  |
| F | 1.42579500  | 2.93555900 | 0.70809500  |
| O | -0.55066500 | 1.06884800 | -0.05722300 |
| C | -1.52540900 | 0.24912500 | 0.41566700  |

|   |             |             |             |
|---|-------------|-------------|-------------|
| O | -1.28564700 | -0.70956300 | 1.12342100  |
| C | -2.87967700 | 0.67195000  | -0.01637500 |
| C | -3.97154500 | -0.08870400 | 0.42158100  |
| C | -3.08648900 | 1.78892100  | -0.83652200 |
| C | -5.26299800 | 0.26618500  | 0.04305900  |
| H | -3.78429500 | -0.95010600 | 1.05344900  |
| C | -4.38114200 | 2.14036500  | -1.21234500 |
| H | -2.23579300 | 2.36965000  | -1.17289700 |
| C | -5.46871900 | 1.38113900  | -0.77393900 |
| H | -6.10895200 | -0.32426200 | 0.38246100  |
| H | -4.54255100 | 3.00585700  | -1.84823400 |
| H | -6.47684000 | 1.65781800  | -1.06981800 |
| C | 1.17980800  | -0.59282700 | -0.46316700 |
| O | 0.58634200  | -0.89443000 | -1.48310200 |
| C | 2.33495300  | -1.38772900 | 0.04169900  |
| C | 3.00633200  | -1.09779700 | 1.23970400  |
| C | 2.76254700  | -2.47465300 | -0.73771100 |
| C | 4.08688200  | -1.87914800 | 1.64614700  |
| H | 2.69101700  | -0.27201200 | 1.86841400  |
| C | 3.83903000  | -3.25392600 | -0.33009400 |
| H | 2.22944200  | -2.68508200 | -1.65845600 |
| C | 4.50444400  | -2.95636800 | 0.86318000  |
| H | 4.59870100  | -1.64949900 | 2.57587000  |
| H | 4.16234400  | -4.09336000 | -0.93861700 |
| H | 5.34548900  | -3.56498800 | 1.18296400  |

**Cat<sup>css</sup>**

|    |             |             |             |
|----|-------------|-------------|-------------|
| C  | -0.40746400 | 1.18956800  | -0.54689500 |
| C  | -1.73755100 | 0.56485500  | -0.88337600 |
| Ni | -1.78932700 | -1.39179300 | 1.33824000  |
| N  | 0.05574900  | -0.73887700 | 1.00186400  |
| N  | -2.39558700 | -0.31424300 | -0.21340900 |
| C  | 0.43527500  | 0.26909000  | 0.30193900  |
| C  | 1.27085100  | -1.33561600 | 1.59608600  |
| C  | 2.29745700  | -0.16297100 | 1.47621200  |
| O  | 1.75462000  | 0.58977600  | 0.34825600  |
| C  | -3.72903700 | -0.44046300 | -0.83429900 |
| C  | -3.54648300 | 0.29919200  | -2.20730400 |
| O  | -2.36256300 | 1.10348300  | -1.97711300 |
| C  | -0.74798200 | 2.53034400  | 0.24994100  |
| H  | -1.53209000 | 2.29264000  | 0.97001600  |
| H  | -1.17913300 | 3.21836000  | -0.48390000 |
| C  | 0.37711200  | 1.57444200  | -1.84162900 |
| H  | -0.32981400 | 2.07630700  | -2.50689600 |

|   |             |             |             |
|---|-------------|-------------|-------------|
| H | 1.11852900  | 2.31019200  | -1.55160900 |
| H | 1.08504500  | -1.54668400 | 2.65041100  |
| H | 2.17554100  | 0.48017500  | 2.34949700  |
| H | -3.93537300 | -1.49499400 | -1.01781300 |
| H | -3.28014800 | -0.44067700 | -2.97274400 |
| C | 1.67516100  | -2.60730100 | 0.88329800  |
| C | 2.60309200  | -4.89227900 | -0.44832900 |
| C | 2.53062400  | -3.50611000 | 1.52912500  |
| C | 1.74041900  | -4.00580600 | -1.09498000 |
| C | 2.99577200  | -4.64162900 | 0.86799200  |
| H | 2.84957600  | -3.30238300 | 2.54834000  |
| H | 1.42503200  | -4.19435600 | -2.11564100 |
| H | 3.66407400  | -5.32838500 | 1.37993400  |
| H | 2.96415100  | -5.77672700 | -0.96611400 |
| H | -8.13850000 | -0.31908500 | 0.67010200  |
| C | -7.14403900 | 0.11288700  | 0.73596500  |
| C | -4.58377300 | 1.19916400  | 0.90408900  |
| C | -6.90159100 | 1.18859600  | 1.59114100  |
| C | -5.61688200 | 1.72971600  | 1.67384700  |
| C | -4.81845000 | 0.12079800  | 0.04808100  |
| H | -7.70644900 | 1.59832300  | 2.19461700  |
| H | -5.41741900 | 2.56031600  | 2.34518400  |
| H | -3.58097900 | 1.60013400  | 0.98970200  |
| C | 4.70745800  | 1.25883900  | -2.38978700 |
| C | 3.34187000  | 1.32862500  | -2.20995100 |
| C | 2.47150400  | 0.33153600  | -2.71669600 |
| C | 3.04559100  | -0.78390200 | -3.40542900 |
| C | 4.44958900  | -0.82247800 | -3.57622600 |
| C | 5.26772800  | 0.17703200  | -3.08856100 |
| C | 1.03107200  | 0.41554100  | -2.56516100 |
| C | 2.18982200  | -1.84775800 | -3.90625000 |
| C | 0.78247400  | -1.72067800 | -3.74918100 |
| C | 0.24729500  | -0.56861800 | -3.09581500 |
| C | -0.07353700 | -2.74352400 | -4.21769700 |
| H | -1.14584300 | -2.62706600 | -4.08013200 |
| C | 0.43631400  | -3.87304200 | -4.82630300 |
| C | 1.82930700  | -4.00602800 | -4.98315100 |
| C | 2.68276100  | -3.01496500 | -4.53314700 |
| H | 5.34504400  | 2.03406800  | -1.97589500 |
| H | 2.94494400  | 2.15556700  | -1.63658600 |
| H | 4.90131800  | -1.65169400 | -4.10803800 |
| H | 6.34233600  | 0.11798700  | -3.23489400 |
| H | -0.83251800 | -0.49316400 | -3.02685100 |
| H | -0.22959800 | -4.65612800 | -5.17664900 |

|   |             |             |             |
|---|-------------|-------------|-------------|
| H | 2.23844600  | -4.89453100 | -5.45530000 |
| H | 3.75022700  | -3.15532600 | -4.65668600 |
| C | -6.10528100 | -0.41757000 | -0.02880700 |
| H | -6.29421100 | -1.25934500 | -0.69009700 |
| C | -4.69456600 | 1.13714800  | -2.68343100 |
| C | -4.88542600 | 2.44317100  | -2.22127000 |
| C | -5.63684300 | 0.57083300  | -3.54642800 |
| C | -6.00924300 | 3.16735600  | -2.61272200 |
| H | -4.15255600 | 2.88528000  | -1.55611000 |
| C | -6.76646300 | 1.29232400  | -3.93252200 |
| H | -5.48708100 | -0.44153600 | -3.91492700 |
| C | -6.95519700 | 2.59320800  | -3.46484300 |
| H | -6.14941900 | 4.18105400  | -2.24840600 |
| H | -7.49314000 | 0.84126400  | -4.60214700 |
| H | -7.83216300 | 3.15896900  | -3.76603600 |
| C | 1.27929200  | -2.86896100 | -0.43073300 |
| H | 0.60396200  | -2.18629700 | -0.93050500 |
| C | 3.74762600  | -0.47935000 | 1.29479900  |
| C | 4.24913200  | -1.04867100 | 0.11890800  |
| C | 4.61590000  | -0.23938500 | 2.36529400  |
| C | 5.59733400  | -1.38261100 | 0.02555100  |
| H | 3.58754000  | -1.23014500 | -0.71781700 |
| C | 5.96549900  | -0.58107700 | 2.27435700  |
| H | 4.22754500  | 0.22122700  | 3.27056800  |
| C | 6.45803600  | -1.15567600 | 1.10211200  |
| H | 5.97299100  | -1.81877900 | -0.89459700 |
| H | 6.63011100  | -0.39217200 | 3.11290300  |
| H | 7.50894700  | -1.42139400 | 1.02548100  |
| C | 4.54815600  | 5.73144800  | 0.31371500  |
| C | 3.29155000  | 5.34406500  | -0.10652400 |
| C | 2.48783900  | 4.49742800  | 0.69132300  |
| C | 2.96940600  | 4.04597700  | 1.95178100  |
| C | 4.26035100  | 4.45694700  | 2.35294200  |
| C | 5.03469200  | 5.27905700  | 1.55438100  |
| C | 1.21740100  | 4.04319400  | 0.22006000  |
| C | 2.11473400  | 3.19084900  | 2.76066500  |
| C | 0.85446200  | 2.75325000  | 2.24685800  |
| C | 0.44632600  | 3.15670100  | 0.91546300  |
| C | 0.04336400  | 1.91863400  | 3.05364500  |
| H | -0.90495300 | 1.55342000  | 2.67938800  |
| C | 0.44298100  | 1.52712500  | 4.31828100  |
| C | 1.68560800  | 1.94769800  | 4.81933200  |
| C | 2.49916300  | 2.76106600  | 4.05165600  |
| H | 0.89125400  | 4.38638200  | -0.75889300 |

|   |             |             |             |
|---|-------------|-------------|-------------|
| H | 5.16015000  | 6.37695900  | -0.30945100 |
| H | 2.90381400  | 5.67630000  | -1.06633000 |
| H | 4.66844400  | 4.12020500  | 3.29895000  |
| H | 6.02553100  | 5.57370900  | 1.88764400  |
| H | -0.20479300 | 0.89179900  | 4.91366000  |
| H | 2.00731800  | 1.64058300  | 5.81022600  |
| H | 3.44901900  | 3.08228300  | 4.46300500  |
| C | -3.00360100 | -3.04501900 | 1.16043800  |
| C | -4.20561900 | -1.69346300 | 2.99556200  |
| C | -2.90138800 | -0.92189800 | 3.03473500  |
| C | -1.67351000 | -1.49842700 | 3.37653400  |
| C | -1.51180300 | -2.93710000 | 3.85313200  |
| C | -1.69210500 | -3.48186500 | 1.36471500  |
| H | -3.35977800 | -3.07070800 | 0.12994000  |
| H | -3.00409800 | 0.16101700  | 3.10374700  |
| H | -0.86681900 | -0.82307400 | 3.65520000  |
| H | -1.12020200 | -3.80574600 | 0.49764800  |
| C | -4.09593800 | -3.03949700 | 2.22608600  |
| C | -1.12476500 | -3.90286200 | 2.70439100  |
| H | -4.58744800 | -1.88500400 | 4.01298100  |
| H | -4.95537700 | -1.06512000 | 2.50773600  |
| H | -3.92582200 | -3.86243000 | 2.93003300  |
| H | -5.06271500 | -3.25211900 | 1.75244300  |
| H | -1.42721100 | -4.93092700 | 2.96775900  |
| H | -0.03368100 | -3.93076600 | 2.60780300  |
| H | -0.74264900 | -2.98187800 | 4.63564700  |
| H | -2.43790500 | -3.27442100 | 4.33124800  |

**IM1<sup>CSS</sup>**

|   |             |             |             |
|---|-------------|-------------|-------------|
| C | -0.38217800 | 0.96998300  | -0.85152100 |
| C | -1.72690500 | 0.44412400  | -1.28487500 |
| N | 0.08849400  | -1.20661900 | 0.34080000  |
| N | -2.34274500 | -0.58715200 | -0.84339000 |
| C | 0.45748300  | -0.07704800 | -0.15210300 |
| C | 1.28784300  | -1.87530600 | 0.89660200  |
| C | 2.29331400  | -0.68664900 | 0.99703200  |
| O | 1.75059300  | 0.25652700  | 0.00696100  |
| C | -3.77350400 | -0.47131200 | -1.23188600 |
| C | -3.69648000 | 0.58285100  | -2.37300900 |
| O | -2.43237400 | 1.26847300  | -2.09955900 |
| C | -0.75325200 | 2.15682100  | 0.15180500  |
| H | -1.63315100 | 1.85574800  | 0.72354300  |
| H | -1.05742700 | 2.99665400  | -0.47911500 |
| C | 0.41925000  | 1.56225800  | -2.04880400 |



|   |             |             |             |
|---|-------------|-------------|-------------|
| H | -0.27717900 | 2.17372900  | -2.62975300 |
| H | 1.15900900  | 2.23667200  | -1.62756500 |
| H | 1.04946100  | -2.22666500 | 1.90223600  |
| H | 2.14759800  | -0.20155100 | 1.96160100  |
| H | -4.11113900 | -1.43553000 | -1.61466500 |
| H | -3.53889000 | 0.05148900  | -3.32110900 |
| C | 1.72642100  | -3.03793500 | 0.03801200  |
| C | 2.69447700  | -5.14578400 | -1.52836700 |
| C | 2.51981500  | -4.03627400 | 0.61015300  |
| C | 1.89448900  | -4.15787800 | -2.10274500 |
| C | 3.00595600  | -5.08364700 | -0.16828100 |
| H | 2.76378700  | -3.98566900 | 1.66833500  |
| H | 1.63842700  | -4.20115100 | -3.15606300 |
| H | 3.62136100  | -5.85442900 | 0.28703200  |
| H | 3.06776100  | -5.96628700 | -2.13507900 |
| H | -6.42545100 | -1.63556300 | 2.41825900  |
| C | -5.89125700 | -0.84369300 | 1.90146100  |
| C | -4.48836100 | 1.16732000  | 0.57550200  |
| C | -5.82185200 | 0.43489200  | 2.45385100  |
| C | -5.11929100 | 1.44182400  | 1.78652200  |
| C | -4.55586900 | -0.11592100 | 0.01541200  |
| H | -6.31121000 | 0.64840700  | 3.39994000  |
| H | -5.06498200 | 2.44155700  | 2.20804900  |
| H | -3.95597100 | 1.95917800  | 0.05936300  |
| C | 4.75330400  | 1.26086900  | -2.62960000 |
| C | 3.38805600  | 1.32945800  | -2.44575100 |
| C | 2.50407400  | 0.43100700  | -3.09285100 |
| C | 3.06108800  | -0.58592700 | -3.93181300 |
| C | 4.46514000  | -0.62736600 | -4.09901200 |
| C | 5.29772700  | 0.27821600  | -3.47229600 |
| C | 1.06505800  | 0.51938500  | -2.93876700 |
| C | 2.18902300  | -1.54903100 | -4.58478900 |
| C | 0.78316000  | -1.42249700 | -4.41457800 |
| C | 0.26600700  | -0.36368100 | -3.60674300 |
| C | -0.08784800 | -2.35537700 | -5.02228900 |
| H | -1.15820900 | -2.24599000 | -4.86708800 |
| C | 0.40682600  | -3.39362600 | -5.78546300 |
| C | 1.79771500  | -3.52142400 | -5.96337200 |
| C | 2.66576400  | -2.61946600 | -5.37557500 |
| H | 5.40383800  | 1.95656800  | -2.10872800 |
| H | 3.00004100  | 2.07320700  | -1.76243100 |
| H | 4.90588700  | -1.38232900 | -4.73922200 |
| H | 6.37189000  | 0.22051300  | -3.62160600 |
| H | -0.81415500 | -0.28251300 | -3.52775100 |

|   |             |             |             |
|---|-------------|-------------|-------------|
| H | -0.26958700 | -4.11048400 | -6.24102200 |
| H | 2.19381900  | -4.33841200 | -6.55937900 |
| H | 3.73101400  | -2.75654900 | -5.51914600 |
| C | -5.25870400 | -1.11790800 | 0.68764600  |
| H | -5.26832800 | -2.12591000 | 0.28761800  |
| C | -4.82194600 | 1.57010500  | -2.51730300 |
| C | -4.57915200 | 2.93769800  | -2.66834500 |
| C | -6.14043900 | 1.09993500  | -2.52649000 |
| C | -5.64520700 | 3.82696900  | -2.81487300 |
| H | -3.55856600 | 3.30323800  | -2.66153700 |
| C | -7.20249900 | 1.98834600  | -2.67754100 |
| H | -6.33869500 | 0.03998900  | -2.39546000 |
| C | -6.95778600 | 3.35604900  | -2.81984800 |
| H | -5.44666900 | 4.88923800  | -2.92522900 |
| H | -8.22167900 | 1.61331600  | -2.67479800 |
| H | -7.78639200 | 4.04915100  | -2.93192900 |
| C | 1.41518700  | -3.10676700 | -1.32146900 |
| H | 0.79178500  | -2.34479200 | -1.77170800 |
| C | 3.75175300  | -0.93667900 | 0.78526000  |
| C | 4.27469300  | -1.34511800 | -0.44708600 |
| C | 4.60939600  | -0.79162200 | 1.88111800  |
| C | 5.63452300  | -1.61584800 | -0.57124600 |
| H | 3.62287900  | -1.45285300 | -1.30407100 |
| C | 5.97106300  | -1.06859200 | 1.75757900  |
| H | 4.20279200  | -0.45929800 | 2.83311500  |
| C | 6.48516000  | -1.48361900 | 0.52880700  |
| H | 6.02696200  | -1.92893600 | -1.53338800 |
| H | 6.62725900  | -0.95473300 | 2.61587500  |
| H | 7.54516000  | -1.69999500 | 0.42705500  |
| C | 4.44000100  | 5.20065400  | 1.63418700  |
| C | 3.27342700  | 4.90994600  | 0.95566300  |
| C | 2.40012400  | 3.89696300  | 1.41273200  |
| C | 2.71693900  | 3.16753700  | 2.59324600  |
| C | 3.91862200  | 3.48719500  | 3.26459000  |
| C | 4.76245200  | 4.47897700  | 2.79828500  |
| C | 1.21874800  | 3.56757900  | 0.67742100  |
| C | 1.79908700  | 2.13394700  | 3.04802300  |
| C | 0.61635000  | 1.85398900  | 2.29613900  |
| C | 0.37147300  | 2.56984300  | 1.06034700  |
| C | -0.26054500 | 0.84141100  | 2.75600400  |
| H | -1.16543400 | 0.60871000  | 2.20836500  |
| C | 0.02024100  | 0.09698000  | 3.88557500  |
| C | 1.19365000  | 0.35714700  | 4.61201700  |
| C | 2.05386900  | 1.36197100  | 4.20594100  |

|    |             |             |             |
|----|-------------|-------------|-------------|
| H  | 1.02103100  | 4.12205100  | -0.23734700 |
| H  | 5.10606200  | 5.97853500  | 1.27261500  |
| H  | 3.01096300  | 5.45421000  | 0.05176100  |
| H  | 4.19725900  | 2.95072000  | 4.16429000  |
| H  | 5.67991700  | 4.70039900  | 3.33579300  |
| H  | -0.65957300 | -0.68533200 | 4.19991400  |
| H  | 1.42125800  | -0.23116200 | 5.49607600  |
| H  | 2.94586800  | 1.55195200  | 4.79189900  |
| Ni | -1.65617600 | -1.98509900 | 0.39631300  |
| Cl | -1.09382700 | -5.08351500 | 0.90430100  |
| C  | -1.85869300 | -3.45978300 | 1.52925600  |
| O  | -3.00425300 | -3.15410800 | 0.99015800  |
| C  | -1.64096700 | -3.29964200 | 2.99674200  |
| C  | -2.61862400 | -2.61781000 | 3.74214900  |
| C  | -0.46521400 | -3.71147000 | 3.64337600  |
| C  | -2.42779800 | -2.36881400 | 5.10021600  |
| H  | -3.52071300 | -2.29324500 | 3.23465300  |
| C  | -0.27210700 | -3.44636900 | 4.99898000  |
| H  | 0.28250700  | -4.25867400 | 3.07924600  |
| C  | -1.25218100 | -2.77819000 | 5.73744300  |
| H  | -3.19944900 | -1.85062900 | 5.66420900  |
| H  | 0.64364100  | -3.77558800 | 5.48368100  |
| H  | -1.10416200 | -2.58192700 | 6.79585200  |

### IM2<sup>CSS</sup>

|   |             |             |             |
|---|-------------|-------------|-------------|
| C | -0.41131400 | 1.15216200  | -0.72874800 |
| C | -1.74281800 | 0.56646000  | -1.11343900 |
| N | 0.02327200  | -0.79967900 | 0.81645800  |
| N | -2.36328800 | -0.41963300 | -0.58230700 |
| C | 0.40628900  | 0.22005800  | 0.12999800  |
| C | 1.23722100  | -1.39278900 | 1.43842400  |
| C | 2.25706400  | -0.22223200 | 1.32817500  |
| O | 1.70662400  | 0.54536900  | 0.20362500  |
| C | -3.75069400 | -0.40920200 | -1.10064800 |
| C | -3.60523800 | 0.49086300  | -2.37339500 |
| O | -2.39733700 | 1.26200100  | -2.06922100 |
| C | -0.77971500 | 2.47821300  | 0.07775200  |
| H | -1.62967200 | 2.25715500  | 0.72543500  |
| H | -1.13278900 | 3.19144300  | -0.67194500 |
| C | 0.41438800  | 1.54485400  | -1.99287300 |
| H | -0.26448500 | 2.07855600  | -2.66318300 |
| H | 1.16573000  | 2.25675900  | -1.66612700 |
| H | 1.03536100  | -1.58246500 | 2.49205200  |
| H | 2.13398300  | 0.42065900  | 2.19934700  |

|   |             |             |             |
|---|-------------|-------------|-------------|
| H | -4.03302400 | -1.42581400 | -1.37411300 |
| H | -3.34757400 | -0.14373600 | -3.22983800 |
| C | 1.64151900  | -2.67741900 | 0.75322300  |
| C | 2.52368800  | -5.02279100 | -0.49247200 |
| C | 2.44526100  | -3.58586800 | 1.44773900  |
| C | 1.71620900  | -4.12349900 | -1.18869700 |
| C | 2.88594200  | -4.75188600 | 0.82913400  |
| H | 2.71278600  | -3.38438600 | 2.48070000  |
| H | 1.42328000  | -4.32609200 | -2.21342400 |
| H | 3.49960200  | -5.45587300 | 1.38333600  |
| H | 2.86268000  | -5.93617300 | -0.97367700 |
| H | -8.10211500 | 0.31758800  | 0.37709700  |
| C | -7.04393400 | 0.47069900  | 0.56871600  |
| C | -4.32683400 | 0.83670000  | 1.05231800  |
| C | -6.63118400 | 1.19969400  | 1.68647500  |
| C | -5.26958300 | 1.37318500  | 1.93015100  |
| C | -4.73284600 | 0.11927700  | -0.07390600 |
| H | -7.36651400 | 1.61667100  | 2.36867600  |
| H | -4.93534300 | 1.91615000  | 2.80968900  |
| H | -3.27108600 | 0.93888600  | 1.27338100  |
| C | 4.73967100  | 1.13373800  | -2.55254600 |
| C | 3.37608300  | 1.23549500  | -2.37086900 |
| C | 2.48363700  | 0.25349600  | -2.86710400 |
| C | 3.03090900  | -0.88131000 | -3.54642600 |
| C | 4.43307500  | -0.95233800 | -3.71912600 |
| C | 5.27393700  | 0.03348500  | -3.24218700 |
| C | 1.04597300  | 0.37103200  | -2.71557800 |
| C | 2.15135100  | -1.93165700 | -4.03455800 |
| C | 0.74761200  | -1.77272800 | -3.87655200 |
| C | 0.24021400  | -0.59987200 | -3.23792000 |
| C | -0.13238000 | -2.78419900 | -4.32459200 |
| H | -1.20100400 | -2.64616600 | -4.18025400 |
| C | 0.35190100  | -3.93207400 | -4.91922300 |
| C | 1.74106800  | -4.09467400 | -5.08226800 |
| C | 2.61751800  | -3.11639600 | -4.64889500 |
| H | 5.39657700  | 1.89796600  | -2.14886200 |
| H | 2.99672000  | 2.07919900  | -1.80961100 |
| H | 4.86536000  | -1.79585800 | -4.24433300 |
| H | 6.34652400  | -0.05014500 | -3.39059400 |
| H | -0.83863900 | -0.50624700 | -3.16989300 |
| H | -0.33137900 | -4.70699700 | -5.25338300 |
| H | 2.12934300  | -4.99730300 | -5.54498400 |
| H | 3.68114300  | -3.28080300 | -4.77517200 |
| C | -6.10008700 | -0.06964200 | -0.29993900 |

|   |             |             |             |
|---|-------------|-------------|-------------|
| H | -6.42670300 | -0.63454100 | -1.16850900 |
| C | -4.73747800 | 1.40375200  | -2.72883900 |
| C | -4.97164800 | 2.58284200  | -2.01221400 |
| C | -5.61716200 | 1.03337300  | -3.74880700 |
| C | -6.07813400 | 3.37325200  | -2.30968700 |
| H | -4.29504700 | 2.86703000  | -1.21428300 |
| C | -6.73231700 | 1.82005300  | -4.04063300 |
| H | -5.43365400 | 0.12171800  | -4.31263800 |
| C | -6.96419700 | 2.99179500  | -3.32060900 |
| H | -6.25505500 | 4.28438900  | -1.74574900 |
| H | -7.41282400 | 1.52047000  | -4.83231000 |
| H | -7.82999300 | 3.60758800  | -3.54647900 |
| C | 1.27844300  | -2.95366100 | -0.56689000 |
| H | 0.64712700  | -2.26189500 | -1.11019700 |
| C | 3.70761200  | -0.53289800 | 1.14323000  |
| C | 4.20876500  | -1.13356500 | -0.01718000 |
| C | 4.57726200  | -0.25117600 | 2.20238500  |
| C | 5.56011800  | -1.45560700 | -0.10623600 |
| H | 3.54731900  | -1.34974800 | -0.84576700 |
| C | 5.92981900  | -0.58124800 | 2.11549600  |
| H | 4.18720500  | 0.22936100  | 3.09624900  |
| C | 6.42263500  | -1.18623900 | 0.95893000  |
| H | 5.93671200  | -1.91679400 | -1.01352600 |
| H | 6.59573400  | -0.36081300 | 2.94499100  |
| H | 7.47570600  | -1.44386100 | 0.88566300  |
| C | 4.35218500  | 5.88091800  | 0.78600000  |
| C | 3.17209400  | 5.44104200  | 0.22065600  |
| C | 2.35703600  | 4.49599000  | 0.88417000  |
| C | 2.74697000  | 3.99270300  | 2.15705900  |
| C | 3.96093500  | 4.46041600  | 2.70858000  |
| C | 4.74730600  | 5.38205400  | 2.04102200  |
| C | 1.16120600  | 4.00773300  | 0.27062400  |
| C | 1.88461400  | 3.02813100  | 2.82417400  |
| C | 0.68421800  | 2.58625700  | 2.18610400  |
| C | 0.36567700  | 3.06700100  | 0.85608600  |
| C | -0.13624100 | 1.64690700  | 2.85656000  |
| H | -1.04574600 | 1.28455900  | 2.39562300  |
| C | 0.20930800  | 1.12673800  | 4.08994000  |
| C | 1.39672800  | 1.55112900  | 4.70908400  |
| C | 2.20732700  | 2.48670800  | 4.09013000  |
| H | 0.90597300  | 4.39042500  | -0.71505600 |
| H | 4.97296400  | 6.60517600  | 0.26688800  |
| H | 2.85369100  | 5.81243100  | -0.75026400 |
| H | 4.29431700  | 4.09682700  | 3.67359200  |

|    |             |             |            |
|----|-------------|-------------|------------|
| H  | 5.67575700  | 5.72175400  | 2.49072700 |
| H  | -0.42711400 | 0.37438000  | 4.54190300 |
| H  | 1.68055700  | 1.14730500  | 5.67667200 |
| H  | 3.11247000  | 2.80541000  | 4.59383800 |
| Ni | -1.73994700 | -1.59608400 | 0.95683300 |
| Cl | -3.57600400 | -2.81677100 | 0.96383100 |
| C  | -1.31854000 | -2.35627200 | 2.61042300 |
| O  | -1.41245500 | -1.61663400 | 3.58406900 |
| C  | -0.77342200 | -3.74687200 | 2.76242900 |
| C  | -0.14010400 | -4.09759900 | 3.96322500 |
| C  | -0.80255300 | -4.66187700 | 1.70367500 |
| C  | 0.46273200  | -5.34528700 | 4.10120400 |
| H  | -0.13126500 | -3.37194000 | 4.77091600 |
| C  | -0.21024900 | -5.91407100 | 1.84612300 |
| H  | -1.29511400 | -4.38137100 | 0.78022300 |
| C  | 0.42648100  | -6.25613200 | 3.04116100 |
| H  | 0.95775100  | -5.61195400 | 5.03160600 |
| H  | -0.23130200 | -6.61815600 | 1.01953100 |
| H  | 0.89778400  | -7.23004200 | 3.14637400 |

**(R)-IM3**<sup>doublet</sup>

|   |             |             |             |
|---|-------------|-------------|-------------|
| C | -1.79550700 | 0.43957700  | -0.11281500 |
| C | -0.76425800 | -0.42915000 | -0.79927900 |
| N | -0.15759800 | 1.30528800  | 1.55961700  |
| N | 0.49622600  | -0.52402400 | -0.58294200 |
| C | -1.34087900 | 0.94267200  | 1.23232800  |
| C | -0.22524100 | 1.90353000  | 2.91669100  |
| C | -1.64244000 | 1.45658700  | 3.39818500  |
| O | -2.31690600 | 1.12620900  | 2.14012800  |
| C | 1.07938400  | -1.39290000 | -1.63775400 |
| C | -0.17567800 | -1.81171100 | -2.49776400 |
| O | -1.27186500 | -1.13364300 | -1.81792100 |
| C | -3.12443000 | -0.34361300 | -0.01688400 |
| H | -3.47792400 | -0.45398400 | -1.04191400 |
| H | -3.85078400 | 0.28551700  | 0.50870500  |
| C | -2.01808300 | 1.76320500  | -0.97275600 |
| H | -2.87110900 | 2.27199000  | -0.51260100 |
| H | -1.14509000 | 2.39937400  | -0.81841400 |
| H | 0.53020900  | 1.42513900  | 3.54151600  |
| H | -1.54559500 | 0.50946200  | 3.93786600  |
| H | 1.71297000  | -0.75194800 | -2.25189200 |
| H | -0.10819200 | -1.35605100 | -3.48796300 |
| C | 0.00987600  | 3.39616900  | 2.86693500  |
| C | 0.45704500  | 6.16213600  | 2.83621800  |

|   |             |             |             |
|---|-------------|-------------|-------------|
| C | 0.76947300  | 4.00079900  | 3.87303100  |
| C | -0.29933700 | 5.56450000  | 1.82676800  |
| C | 0.99065100  | 5.37674500  | 3.85788000  |
| H | 1.22620700  | 3.38226400  | 4.63932800  |
| H | -0.71330400 | 6.16859200  | 1.02406400  |
| H | 1.59702400  | 5.83165000  | 4.63547600  |
| H | 0.63868800  | 7.23292100  | 2.81910800  |
| H | 4.73797000  | -4.25802200 | -1.86651900 |
| C | 3.82597400  | -3.98739200 | -1.34281200 |
| C | 1.50780900  | -3.25069900 | 0.02520700  |
| C | 3.42356400  | -4.70349500 | -0.21392000 |
| C | 2.26430900  | -4.33217600 | 0.46928800  |
| C | 1.90609400  | -2.53015300 | -1.10180300 |
| H | 4.01737600  | -5.54320200 | 0.13669200  |
| H | 1.94176300  | -4.87808000 | 1.35073700  |
| H | 0.62001100  | -2.95575000 | 0.56656500  |
| C | 1.19225100  | 1.41520000  | -3.89436900 |
| C | 0.15110900  | 1.61005800  | -3.00593100 |
| C | -1.19719600 | 1.40219000  | -3.38317500 |
| C | -1.48128400 | 1.01933500  | -4.73072200 |
| C | -0.39522200 | 0.82437600  | -5.61465200 |
| C | 0.91441100  | 1.00752500  | -5.20948400 |
| C | -2.28684400 | 1.54050100  | -2.43680800 |
| C | -2.86143100 | 0.83781600  | -5.15694400 |
| C | -3.90466800 | 1.05950700  | -4.21510200 |
| C | -3.57374800 | 1.40343200  | -2.86754300 |
| C | -5.25342200 | 0.90660000  | -4.60840900 |
| H | -6.03354100 | 1.08143200  | -3.87162100 |
| C | -5.57819800 | 0.53641300  | -5.89787500 |
| C | -4.55139400 | 0.30960800  | -6.83291900 |
| C | -3.22536200 | 0.45793300  | -6.46852100 |
| H | 2.21182700  | 1.56410900  | -3.55655200 |
| H | 0.39808000  | 1.91200900  | -1.99643100 |
| H | -0.58499100 | 0.52452300  | -6.63860900 |
| H | 1.72550100  | 0.84504500  | -5.91343900 |
| H | -4.39233900 | 1.53302100  | -2.16300300 |
| H | -6.61748100 | 0.41880200  | -6.19004100 |
| H | -4.79966000 | 0.01636400  | -7.84878300 |
| H | -2.45965100 | 0.27715600  | -7.21392700 |
| C | 3.06810100  | -2.90442200 | -1.78248000 |
| H | 3.39111500  | -2.33026300 | -2.64731300 |
| C | -0.45811300 | -3.28299200 | -2.60908300 |
| C | -1.24508600 | -3.94905700 | -1.66667500 |
| C | 0.14268200  | -4.00929100 | -3.64117600 |

|   |             |             |             |
|---|-------------|-------------|-------------|
| C | -1.42369200 | -5.32836800 | -1.75040400 |
| H | -1.71698300 | -3.38995600 | -0.87177800 |
| C | -0.02915100 | -5.39048300 | -3.72144200 |
| H | 0.75421700  | -3.49338500 | -4.37770300 |
| C | -0.81261900 | -6.05325700 | -2.77432400 |
| H | -2.03399000 | -5.83009900 | -1.00576100 |
| H | 0.44551000  | -5.94779200 | -4.52408100 |
| H | -0.94710300 | -7.12949300 | -2.83713900 |
| C | -0.52114700 | 4.18842300  | 1.84376100  |
| H | -1.10613100 | 3.73050500  | 1.05274300  |
| C | -2.42865000 | 2.44960800  | 4.19742200  |
| C | -2.23939300 | 2.48928000  | 5.58227100  |
| C | -3.27960600 | 3.37826000  | 3.59249700  |
| C | -2.88315400 | 3.45571300  | 6.35371700  |
| H | -1.58044000 | 1.76542500  | 6.05562400  |
| C | -3.93192500 | 4.33744800  | 4.36552000  |
| H | -3.43211000 | 3.34374000  | 2.51956500  |
| C | -3.73182000 | 4.38244400  | 5.74620800  |
| H | -2.72611500 | 3.48062200  | 7.42811600  |
| H | -4.59427200 | 5.05371200  | 3.88770800  |
| H | -4.23742800 | 5.13357200  | 6.34616900  |
| C | -0.61855500 | -5.08626400 | 3.17808500  |
| C | -0.78075200 | -3.78806500 | 2.73515500  |
| C | -1.89518100 | -3.43521200 | 1.93845100  |
| C | -2.86859400 | -4.41465700 | 1.60253700  |
| C | -2.67271700 | -5.73413700 | 2.07126300  |
| C | -1.57086000 | -6.06529600 | 2.83917800  |
| C | -2.01857000 | -2.10032900 | 1.42894800  |
| C | -4.00592600 | -4.01471400 | 0.78848300  |
| C | -4.09624800 | -2.67216600 | 0.30741700  |
| C | -3.04832500 | -1.71728300 | 0.61839000  |
| C | -5.21633800 | -2.30999100 | -0.47907900 |
| H | -5.31178600 | -1.29290000 | -0.84028700 |
| C | -6.20581400 | -3.22063500 | -0.79492800 |
| C | -6.11089600 | -4.54233300 | -0.33076600 |
| C | -5.03259300 | -4.92287600 | 0.44476100  |
| H | -1.21001600 | -1.42422300 | 1.68839600  |
| H | 0.24246500  | -5.34946600 | 3.78587300  |
| H | -0.04738000 | -3.02191200 | 2.96989900  |
| H | -3.38966600 | -6.51025900 | 1.82833000  |
| H | -1.44352700 | -7.08827300 | 3.18202000  |
| H | -7.05339400 | -2.91286200 | -1.40033100 |
| H | -6.88359100 | -5.26500200 | -0.57641300 |
| H | -4.98413500 | -5.94503000 | 0.80169700  |



|    |            |             |             |
|----|------------|-------------|-------------|
| Ni | 1.62114100 | 0.54755700  | 0.79484600  |
| Cl | 1.49294500 | -0.97453400 | 2.62095100  |
| C  | 3.20122100 | 0.35665800  | -0.24841100 |
| O  | 3.07727500 | 1.01341400  | -1.27496300 |
| C  | 4.39954200 | -0.47740800 | 0.01409300  |
| C  | 5.52161500 | -0.28720800 | -0.81086800 |
| C  | 4.42563800 | -1.45223500 | 1.01673100  |
| C  | 6.65888100 | -1.06675600 | -0.62905200 |
| H  | 5.47860400 | 0.47153300  | -1.58550500 |
| C  | 5.56187700 | -2.23991300 | 1.18288500  |
| H  | 3.55561800 | -1.59314400 | 1.64531000  |
| C  | 6.67731000 | -2.04937700 | 0.36723000  |
| H  | 7.52881000 | -0.91484300 | -1.26226000 |
| H  | 5.57549900 | -2.99940400 | 1.95809800  |
| H  | 7.56429400 | -2.66173100 | 0.50693900  |
| C  | 2.98835700 | 3.14821300  | 0.86197700  |
| C  | 2.74461600 | 1.92401900  | 1.70175000  |
| H  | 3.80447600 | 3.00353800  | 0.14988700  |
| H  | 2.07394600 | 3.41548400  | 0.31944700  |
| H  | 2.10101800 | 2.17859100  | 2.53315400  |
| F  | 3.32786900 | 4.22695900  | 1.68691800  |
| O  | 3.97789800 | 1.46574200  | 2.24609900  |
| C  | 4.03882800 | 1.27267600  | 3.58366000  |
| O  | 3.14884100 | 1.56627300  | 4.36051100  |
| C  | 5.33430500 | 0.66553400  | 3.98891900  |
| C  | 6.36645800 | 0.42994700  | 3.07171300  |
| C  | 5.50468200 | 0.32128000  | 5.33587900  |
| C  | 7.55768500 | -0.14951600 | 3.50338300  |
| H  | 6.22859700 | 0.69111200  | 2.03015900  |
| C  | 6.69580500 | -0.25890400 | 5.76273800  |
| H  | 4.68965500 | 0.51270600  | 6.02533800  |
| C  | 7.72445600 | -0.49491400 | 4.84602700  |
| H  | 8.35174800 | -0.33845100 | 2.78691400  |
| H  | 6.82383200 | -0.52935700 | 6.80703700  |
| H  | 8.65409400 | -0.94899200 | 5.17880600  |

**(S)-IM3**<sup>doublet</sup>

|   |             |             |             |
|---|-------------|-------------|-------------|
| C | 0.71917100  | -1.46253000 | 0.23493700  |
| C | 0.95800200  | -0.12346100 | -0.42628700 |
| N | -1.37838800 | -0.68109000 | 1.34345500  |
| N | 0.22026800  | 0.92604300  | -0.48086600 |
| C | -0.34566800 | -1.42731600 | 1.29881900  |
| C | -2.22082200 | -1.13500700 | 2.46989900  |
| C | -1.22607700 | -2.03467500 | 3.27334800  |

|   |             |             |             |
|---|-------------|-------------|-------------|
| O | -0.21714900 | -2.36394100 | 2.27034900  |
| C | 0.91286100  | 1.92718300  | -1.33623800 |
| C | 2.18751200  | 1.14925200  | -1.84484300 |
| O | 2.11804000  | -0.09471900 | -1.09176600 |
| C | 2.07006100  | -1.96606600 | 0.80143300  |
| H | 2.68582100  | -2.19070300 | -0.06640400 |
| H | 1.88704300  | -2.91112400 | 1.32344100  |
| C | 0.17313600  | -2.48982100 | -0.85588400 |
| H | 0.12016900  | -3.45629800 | -0.34436000 |
| H | -0.84688500 | -2.18762200 | -1.09587600 |
| H | -2.48695100 | -0.26074700 | 3.06561800  |
| H | -0.71706700 | -1.41304200 | 4.01791600  |
| H | 0.26922000  | 2.12039900  | -2.19640800 |
| H | 2.05501500  | 0.87572500  | -2.89283100 |
| C | -3.46988200 | -1.83531900 | 1.97838300  |
| C | -5.80601400 | -3.12700900 | 1.11618200  |
| C | -4.69692000 | -1.56600500 | 2.59021400  |
| C | -4.58284100 | -3.40779500 | 0.50460000  |
| C | -5.86062700 | -2.20595100 | 2.16215700  |
| H | -4.74355000 | -0.83671300 | 3.39472800  |
| H | -4.53577400 | -4.10757700 | -0.32437900 |
| H | -6.80864600 | -1.97446800 | 2.63878300  |
| H | -6.71198300 | -3.61489600 | 0.76886500  |
| H | 1.80846300  | 6.48710000  | -1.41786500 |
| C | 1.72748200  | 5.58804600  | -0.81384800 |
| C | 1.48199400  | 3.27896200  | 0.73048800  |
| C | 1.98841400  | 5.63539000  | 0.55793400  |
| C | 1.86054800  | 4.48012200  | 1.32815100  |
| C | 1.22332600  | 3.22641500  | -0.63790300 |
| H | 2.28305000  | 6.57225000  | 1.02307800  |
| H | 2.05667000  | 4.50070600  | 2.39526600  |
| H | 1.36246600  | 2.39112600  | 1.33367100  |
| C | -0.29688600 | 0.11392200  | -4.31724400 |
| C | -0.18119400 | -0.78519300 | -3.27300600 |
| C | 0.87419800  | -1.72623500 | -3.21843000 |
| C | 1.81882700  | -1.76541900 | -4.28952100 |
| C | 1.67702400  | -0.82857900 | -5.33977200 |
| C | 0.64925200  | 0.09787900  | -5.35594300 |
| C | 1.03058700  | -2.62360300 | -2.08988400 |
| C | 2.89070400  | -2.75026900 | -4.27357300 |
| C | 2.96150100  | -3.66631900 | -3.18671600 |
| C | 2.01748300  | -3.56542000 | -2.11723900 |
| C | 3.98233400  | -4.64321800 | -3.15506600 |
| H | 4.01638500  | -5.33299500 | -2.31529100 |

|   |             |             |             |
|---|-------------|-------------|-------------|
| C | 4.92219900  | -4.72029900 | -4.16322100 |
| C | 4.86157200  | -3.81381000 | -5.23776500 |
| C | 3.86783900  | -2.85290700 | -5.28921700 |
| H | -1.11397100 | 0.82857000  | -4.31074300 |
| H | -0.91787900 | -0.74392100 | -2.48456400 |
| H | 2.38728700  | -0.83094400 | -6.15845200 |
| H | 0.57267600  | 0.80439000  | -6.17765500 |
| H | 2.12307800  | -4.25698600 | -1.28399000 |
| H | 5.70433400  | -5.47297500 | -4.12826600 |
| H | 5.59906100  | -3.86724800 | -6.03336500 |
| H | 3.84851300  | -2.17079300 | -6.13128000 |
| C | 1.34645500  | 4.38774100  | -1.40704900 |
| H | 1.12936800  | 4.35300400  | -2.47162600 |
| C | 3.52734000  | 1.79048300  | -1.63614600 |
| C | 4.13633800  | 1.79610500  | -0.37692900 |
| C | 4.15973100  | 2.42143500  | -2.70946700 |
| C | 5.36198100  | 2.42962600  | -0.19438100 |
| H | 3.65604000  | 1.30050800  | 0.45551100  |
| C | 5.38280000  | 3.06759300  | -2.52511700 |
| H | 3.69306200  | 2.40540600  | -3.69176500 |
| C | 5.98553600  | 3.07222000  | -1.26654000 |
| H | 5.82337800  | 2.42027700  | 0.78835800  |
| H | 5.86695900  | 3.55832000  | -3.36478900 |
| H | 6.94038600  | 3.57034900  | -1.12301400 |
| C | -3.42328800 | -2.76785600 | 0.93572100  |
| H | -2.48240700 | -2.97584100 | 0.43951900  |
| C | -1.79479400 | -3.26702200 | 3.90888800  |
| C | -2.42126200 | -3.14673900 | 5.15356900  |
| C | -1.77796000 | -4.50667700 | 3.26510300  |
| C | -3.03697900 | -4.24985300 | 5.74250200  |
| H | -2.43025500 | -2.18437000 | 5.65991300  |
| C | -2.38488900 | -5.61263200 | 3.85921400  |
| H | -1.28424500 | -4.60089600 | 2.30464100  |
| C | -3.01981300 | -5.48684900 | 5.09556900  |
| H | -3.52364000 | -4.14479000 | 6.70782900  |
| H | -2.36422500 | -6.57363900 | 3.35311200  |
| H | -3.49498800 | -6.34878700 | 5.55500300  |
| C | 2.81542600  | 2.87097000  | 4.67628100  |
| C | 2.15034400  | 1.92250800  | 3.92405300  |
| C | 2.87238100  | 0.93211000  | 3.21797600  |
| C | 4.29147300  | 0.90129000  | 3.28212700  |
| C | 4.94165700  | 1.88969000  | 4.05658500  |
| C | 4.22155200  | 2.85350100  | 4.73897000  |
| C | 2.17352000  | -0.02426000 | 2.41152900  |

|    |             |             |             |
|----|-------------|-------------|-------------|
| C  | 4.99801900  | -0.13695000 | 2.54765800  |
| C  | 4.26172800  | -1.08670500 | 1.77285000  |
| C  | 2.81446600  | -0.99643000 | 1.69835000  |
| C  | 4.97940200  | -2.08845300 | 1.07560900  |
| H  | 4.44281500  | -2.82797800 | 0.49368600  |
| C  | 6.35853000  | -2.15418900 | 1.11458200  |
| C  | 7.08106400  | -1.21176600 | 1.86321900  |
| C  | 6.40802800  | -0.22974600 | 2.56418900  |
| H  | 1.09613800  | 0.09866900  | 2.37067500  |
| H  | 2.25426600  | 3.63038500  | 5.21333000  |
| H  | 1.06723700  | 1.93845300  | 3.83589600  |
| H  | 6.02340300  | 1.90218600  | 4.12723600  |
| H  | 4.74777800  | 3.60093400  | 5.32610400  |
| H  | 6.87968400  | -2.93182900 | 0.56388700  |
| H  | 8.16596500  | -1.25345400 | 1.89478000  |
| H  | 6.98414800  | 0.48380100  | 3.14170700  |
| Ni | -1.71036800 | 1.08902100  | 0.20710700  |
| Cl | -1.22482500 | 2.05082200  | 2.46753600  |
| C  | -2.10275600 | 2.44988300  | -1.16115500 |
| O  | -2.35300900 | 1.98424500  | -2.25680800 |
| C  | -1.98731300 | 3.92793400  | -0.97875800 |
| C  | -2.21370900 | 4.73322200  | -2.11033400 |
| C  | -1.64141600 | 4.52399300  | 0.23850200  |
| C  | -2.09671600 | 6.11476700  | -2.01970800 |
| H  | -2.47982700 | 4.25251600  | -3.04560900 |
| C  | -1.52604300 | 5.91008900  | 0.32300300  |
| H  | -1.44155700 | 3.90377100  | 1.10365300  |
| C  | -1.75175200 | 6.70619600  | -0.79954600 |
| H  | -2.27419300 | 6.73339500  | -2.89529100 |
| H  | -1.24148000 | 6.36336000  | 1.26734000  |
| H  | -1.65553000 | 7.78650200  | -0.72927200 |
| C  | -3.65575300 | 1.22436700  | 0.54213500  |
| H  | -3.73223000 | 0.64646800  | 1.46205600  |
| C  | -4.36613700 | 2.52542800  | 0.74865000  |
| H  | -4.52279700 | 3.06817700  | -0.18821400 |
| H  | -3.78830600 | 3.13713100  | 1.44532700  |
| F  | -5.63145500 | 2.29198500  | 1.31221100  |
| O  | -4.40274200 | 0.47471200  | -0.46662400 |
| C  | -3.73957400 | -0.40134900 | -1.19996000 |
| O  | -2.51349500 | -0.53374500 | -1.15578200 |
| C  | -4.59800000 | -1.23673500 | -2.06791900 |
| C  | -3.98885300 | -2.06448600 | -3.01935100 |
| C  | -5.98956400 | -1.25107900 | -1.90920500 |
| C  | -4.76959700 | -2.90471000 | -3.80854900 |

|   |             |             |             |
|---|-------------|-------------|-------------|
| H | -2.91076900 | -2.03602900 | -3.13360100 |
| C | -6.76543200 | -2.09670900 | -2.69817500 |
| H | -6.44309900 | -0.61627200 | -1.15733400 |
| C | -6.15761300 | -2.92421200 | -3.64583300 |
| H | -4.29827300 | -3.54321400 | -4.54995100 |
| H | -7.84399700 | -2.11409500 | -2.57205900 |
| H | -6.76563000 | -3.58364400 | -4.25900400 |

**IM4**<sup>doublet</sup>

|    |             |             |             |
|----|-------------|-------------|-------------|
| C  | -0.35470000 | 0.54895900  | 1.37980700  |
| C  | -0.72749300 | 1.07878000  | 0.01048000  |
| Ni | -0.14480900 | -1.37605000 | -1.44844700 |
| N  | 0.75860500  | -1.42564900 | 0.30684900  |
| N  | -0.58756400 | 0.51586700  | -1.13549800 |
| C  | 0.50899300  | -0.68811100 | 1.31594100  |
| C  | 1.59109600  | -2.56456500 | 0.73257500  |
| C  | 1.87257000  | -2.24294900 | 2.25478200  |
| O  | 1.04915000  | -1.06133500 | 2.50372900  |
| C  | -0.98496200 | 1.47726600  | -2.18338100 |
| C  | -1.27877400 | 2.79481200  | -1.36474300 |
| O  | -1.23578900 | 2.33001000  | 0.02516000  |
| C  | -1.67398300 | 0.23822700  | 2.19536600  |
| H  | -2.09114700 | 1.20778100  | 2.48035200  |
| H  | -1.36704500 | -0.26060000 | 3.11892600  |
| C  | 0.40885100  | 1.64386900  | 2.18329600  |
| H  | -0.22940700 | 2.53282500  | 2.21544700  |
| H  | 0.47721500  | 1.26566700  | 3.20626600  |
| H  | 0.95377300  | -3.44973800 | 0.65898200  |
| H  | 1.45684200  | -3.03895600 | 2.87855900  |
| H  | -0.10313500 | 1.65646000  | -2.80685000 |
| H  | -0.42807600 | 3.47498400  | -1.46473100 |
| C  | 2.78795400  | -2.75640800 | -0.16277700 |
| C  | 5.02322300  | -3.15469900 | -1.79962400 |
| C  | 3.67845200  | -1.70635300 | -0.41053500 |
| C  | 4.13105800  | -4.20131000 | -1.56785200 |
| C  | 4.79153600  | -1.90343300 | -1.22210200 |
| H  | 3.50987000  | -0.73767400 | 0.04220900  |
| H  | 4.29290800  | -5.17071100 | -2.03031000 |
| H  | 5.47453400  | -1.07810100 | -1.39928800 |
| H  | 5.89171000  | -3.30978300 | -2.43402300 |
| H  | -4.52209100 | -1.39090700 | -3.29631000 |
| C  | -3.92373000 | -0.53094500 | -3.57374400 |
| C  | -2.35663000 | 1.66241700  | -4.26717900 |
| C  | -4.19472900 | 0.17200900  | -4.74596700 |

|   |             |             |             |
|---|-------------|-------------|-------------|
| C | -3.40604400 | 1.27180100  | -5.09394300 |
| C | -2.09369000 | 0.97200800  | -3.07786900 |
| H | -5.01097400 | -0.13872500 | -5.39218300 |
| H | -3.60532200 | 1.82086700  | -6.00992600 |
| H | -1.74757800 | 2.52231500  | -4.53618500 |
| C | 3.08840500  | 3.72345100  | 4.81385200  |
| C | 2.24190000  | 3.10005000  | 3.91714500  |
| C | 2.68087600  | 2.70920600  | 2.62946700  |
| C | 4.03122200  | 2.99133400  | 2.25333300  |
| C | 4.87272800  | 3.62546100  | 3.19516700  |
| C | 4.41964200  | 3.98266600  | 4.45124000  |
| C | 1.79808000  | 2.01706500  | 1.70682500  |
| C | 4.50525100  | 2.62103200  | 0.92878500  |
| C | 3.59511200  | 1.99663600  | 0.03533800  |
| C | 2.26085500  | 1.70290400  | 0.46275600  |
| C | 4.01738400  | 1.63199600  | -1.26360700 |
| H | 3.30825300  | 1.13817500  | -1.92265600 |
| C | 5.31260500  | 1.87199200  | -1.67782900 |
| C | 6.22190500  | 2.48409600  | -0.79472300 |
| C | 5.82532700  | 2.84930700  | 0.47916800  |
| H | 2.72289200  | 4.01060400  | 5.79532500  |
| H | 1.21579500  | 2.91482700  | 4.21217600  |
| H | 5.90083300  | 3.84518600  | 2.93177400  |
| H | 5.09266100  | 4.46778800  | 5.15204300  |
| H | 1.64067500  | 1.17389000  | -0.24888600 |
| H | 5.62958700  | 1.58505400  | -2.67609300 |
| H | 7.24336400  | 2.67048500  | -1.11344700 |
| H | 6.55071000  | 3.31681600  | 1.13502400  |
| C | -2.88027600 | -0.12988500 | -2.73840500 |
| H | -2.67688700 | -0.68432400 | -1.83037500 |
| C | -2.54857700 | 3.54014600  | -1.64523300 |
| C | -2.48104200 | 4.85483200  | -2.11288900 |
| C | -3.80060400 | 2.93086300  | -1.49493200 |
| C | -3.64550600 | 5.55401600  | -2.43686300 |
| H | -1.51162000 | 5.33381300  | -2.22830600 |
| C | -4.96172700 | 3.62636200  | -1.81557100 |
| H | -3.86187300 | 1.90421200  | -1.16148900 |
| C | -4.88815100 | 4.93957300  | -2.28893400 |
| H | -3.57957100 | 6.57489600  | -2.80173300 |
| H | -5.92502100 | 3.13506900  | -1.71473200 |
| H | -5.79611100 | 5.47829600  | -2.54475800 |
| C | 3.01490600  | -3.99964600 | -0.75449000 |
| H | 2.30015600  | -4.80292300 | -0.60139200 |
| C | 3.30622500  | -1.97761800 | 2.63919400  |

|    |             |             |             |
|----|-------------|-------------|-------------|
| C  | 4.20555800  | -3.05007900 | 2.66007700  |
| C  | 3.76984500  | -0.69129800 | 2.91851100  |
| C  | 5.55411000  | -2.83209700 | 2.93006600  |
| H  | 3.85565000  | -4.05355500 | 2.43235400  |
| C  | 5.12079200  | -0.47209800 | 3.19083700  |
| H  | 3.08035900  | 0.14031400  | 2.91483300  |
| C  | 6.01723500  | -1.53986100 | 3.19172600  |
| H  | 6.24508600  | -3.67015900 | 2.92980900  |
| H  | 5.46301400  | 0.53792900  | 3.39646500  |
| H  | 7.07054200  | -1.37020800 | 3.39652700  |
| C  | -6.84176100 | -0.32905700 | -1.17954000 |
| C  | -5.88805700 | 0.26389300  | -0.37697600 |
| C  | -4.79037700 | -0.47704300 | 0.11679300  |
| C  | -4.66892900 | -1.85927000 | -0.20004400 |
| C  | -5.66279600 | -2.43935500 | -1.02139900 |
| C  | -6.72400500 | -1.69340600 | -1.50290000 |
| C  | -3.78183100 | 0.15220800  | 0.91199700  |
| C  | -3.55935500 | -2.61293300 | 0.36220500  |
| C  | -2.63951600 | -1.96607800 | 1.24275100  |
| C  | -2.73103100 | -0.53606400 | 1.44665500  |
| C  | -1.66965500 | -2.75217300 | 1.90641400  |
| H  | -1.01866800 | -2.28957300 | 2.63731000  |
| C  | -1.53935900 | -4.10244400 | 1.64976500  |
| C  | -2.37521200 | -4.71696500 | 0.70336000  |
| C  | -3.37150000 | -3.98583900 | 0.08864900  |
| H  | -3.85771700 | 1.22393200  | 1.07682100  |
| H  | -7.67954700 | 0.25027800  | -1.55624300 |
| H  | -5.96893500 | 1.31352300  | -0.10782600 |
| H  | -5.60578500 | -3.49029000 | -1.27935200 |
| H  | -7.47181000 | -2.16726800 | -2.13215400 |
| H  | -0.78950800 | -4.68653700 | 2.17659900  |
| H  | -2.24836400 | -5.76745500 | 0.46201300  |
| H  | -4.01486200 | -4.48447800 | -0.62581700 |
| Cl | -0.38138900 | -3.28580600 | -2.47859200 |

**IM5**<sup>doublet</sup>

|   |             |             |             |
|---|-------------|-------------|-------------|
| C | -2.08813000 | 1.30102100  | -0.05671000 |
| C | -1.58847400 | -0.11456900 | -0.26306700 |
| N | 0.16393000  | 2.15859400  | 0.64522600  |
| N | -0.38928100 | -0.55796500 | -0.32146700 |
| C | -1.10846200 | 2.22984000  | 0.61660400  |
| C | 0.67377700  | 3.26912400  | 1.47143100  |
| C | -0.58222500 | 4.20293700  | 1.59683800  |
| O | -1.67614700 | 3.30904100  | 1.19437900  |

|   |             |             |             |
|---|-------------|-------------|-------------|
| C | -0.42530500 | -1.97143800 | -0.75059300 |
| C | -1.96866800 | -2.28074400 | -0.82742500 |
| O | -2.57349800 | -0.99654500 | -0.49543500 |
| C | -3.40396900 | 1.23175600  | 0.75500700  |
| H | -4.12931300 | 0.72134200  | 0.12135600  |
| H | -3.76819200 | 2.25259300  | 0.90742400  |
| C | -2.31444600 | 1.96626800  | -1.48562400 |
| H | -2.76948800 | 2.94159200  | -1.28996700 |
| H | -1.32070800 | 2.13840700  | -1.90479500 |
| H | 0.90237100  | 2.83855800  | 2.45225300  |
| H | -0.77221400 | 4.46466700  | 2.63834400  |
| H | -0.02723100 | -1.99693200 | -1.76585900 |
| H | -2.24663100 | -2.48490700 | -1.86335000 |
| C | 1.91875500  | 3.93767300  | 0.94506900  |
| C | 4.19241500  | 5.30446100  | 0.04716100  |
| C | 2.32834700  | 3.81466300  | -0.38569500 |
| C | 3.78179500  | 5.42868000  | 1.37651800  |
| C | 3.46825800  | 4.49227800  | -0.82488500 |
| H | 1.78493000  | 3.16825300  | -1.06956000 |
| H | 4.34414700  | 6.05111500  | 2.06708200  |
| H | 3.78601700  | 4.38044300  | -1.85788700 |
| H | 5.07589200  | 5.83215600  | -0.30160600 |
| H | 1.23714100  | -3.40880900 | 3.37114500  |
| C | 1.21479000  | -3.55706800 | 2.29567100  |
| C | 1.14841000  | -3.90301400 | -0.46629100 |
| C | 1.96050400  | -4.57870300 | 1.70345100  |
| C | 1.92359800  | -4.75425300 | 0.31948000  |
| C | 0.40531100  | -2.87465300 | 0.12132100  |
| H | 2.57449900  | -5.23162600 | 2.31750400  |
| H | 2.51497200  | -5.53514700 | -0.14937300 |
| H | 1.13792100  | -4.01901500 | -1.54742600 |
| C | -0.70737600 | -1.05519000 | -4.17973200 |
| C | -1.22654000 | -0.03572700 | -3.40105200 |
| C | -2.62672200 | 0.13984700  | -3.27066500 |
| C | -3.50700000 | -0.72954300 | -3.98826600 |
| C | -2.93903300 | -1.76684900 | -4.76266600 |
| C | -1.56942200 | -1.93610500 | -4.85339500 |
| C | -3.18828100 | 1.16566000  | -2.41326500 |
| C | -4.94734800 | -0.53208200 | -3.90928600 |
| C | -5.45059900 | 0.54169400  | -3.12286500 |
| C | -4.53830700 | 1.36006800  | -2.38680500 |
| C | -6.84381600 | 0.76687500  | -3.04675500 |
| H | -7.20426800 | 1.59428300  | -2.44033700 |
| C | -7.73220500 | -0.04677000 | -3.72072500 |



|   |             |             |             |
|---|-------------|-------------|-------------|
| C | -7.24221800 | -1.11498800 | -4.49466200 |
| C | -5.88198200 | -1.34906900 | -4.58520100 |
| H | 0.36930100  | -1.16658900 | -4.25056100 |
| H | -0.52151900 | 0.60900200  | -2.88472300 |
| H | -3.58473200 | -2.44710400 | -5.30593700 |
| H | -1.16445900 | -2.74289200 | -5.45821900 |
| H | -4.95447600 | 2.14818900  | -1.76293400 |
| H | -8.80119300 | 0.13332100  | -3.65415200 |
| H | -7.93513800 | -1.76084900 | -5.02626100 |
| H | -5.53861200 | -2.17903400 | -5.19191400 |
| C | 0.44000600  | -2.71047000 | 1.50813800  |
| H | -0.12290500 | -1.91041500 | 1.96981400  |
| C | -2.47562100 | -3.36256400 | 0.08360200  |
| C | -2.90285900 | -3.08647000 | 1.38397600  |
| C | -2.44300800 | -4.68714900 | -0.36303600 |
| C | -3.28646600 | -4.12352500 | 2.23248000  |
| H | -2.93889900 | -2.06355700 | 1.72885800  |
| C | -2.81873400 | -5.72581100 | 0.48731700  |
| H | -2.11343500 | -4.90596700 | -1.37599300 |
| C | -3.24066900 | -5.44566600 | 1.78872400  |
| H | -3.61128300 | -3.89038700 | 3.24182100  |
| H | -2.78568200 | -6.75221700 | 0.13293400  |
| H | -3.53456000 | -6.25498000 | 2.45127000  |
| C | 2.65453200  | 4.74229600  | 1.82207100  |
| H | 2.34499300  | 4.82792300  | 2.86156500  |
| C | -0.59282600 | 5.43703500  | 0.73908800  |
| C | -0.59481400 | 5.34646300  | -0.65883100 |
| C | -0.56251700 | 6.69623100  | 1.34135500  |
| C | -0.57131100 | 6.50085300  | -1.43638900 |
| H | -0.59689700 | 4.37490600  | -1.14059800 |
| C | -0.53082200 | 7.85473000  | 0.56346100  |
| H | -0.55987700 | 6.77122200  | 2.42607000  |
| C | -0.53751400 | 7.75826500  | -0.82736600 |
| H | -0.56904600 | 6.41924900  | -2.51942400 |
| H | -0.50562500 | 8.82835200  | 1.04429600  |
| H | -0.51480800 | 8.65743500  | -1.43637400 |
| C | -0.54406200 | -1.64198500 | 5.49551100  |
| C | -0.68619500 | -0.81672300 | 4.39712500  |
| C | -1.96838800 | -0.55219200 | 3.86122200  |
| C | -3.12504600 | -1.12375700 | 4.45548000  |
| C | -2.94531800 | -1.96147500 | 5.58015400  |
| C | -1.68396500 | -2.21799700 | 6.08766900  |
| C | -2.09591200 | 0.25061400  | 2.68312400  |
| C | -4.42308400 | -0.83359500 | 3.86516300  |

|    |             |             |             |
|----|-------------|-------------|-------------|
| C  | -4.50416800 | -0.02902700 | 2.68584600  |
| C  | -3.29537900 | 0.49214700  | 2.07628700  |
| C  | -5.77894700 | 0.22961000  | 2.12820400  |
| H  | -5.85883100 | 0.84593600  | 1.24046100  |
| C  | -6.93246700 | -0.28089000 | 2.69131800  |
| C  | -6.85213600 | -1.07686200 | 3.84540800  |
| C  | -5.62140000 | -1.34201600 | 4.41491400  |
| H  | -1.16332500 | 0.61017600  | 2.26616300  |
| H  | 0.44321100  | -1.84593900 | 5.89991100  |
| H  | 0.18262100  | -0.37562500 | 3.91430500  |
| H  | -3.80230000 | -2.42173800 | 6.05902900  |
| H  | -1.57543900 | -2.87014700 | 6.94967400  |
| H  | -7.89718500 | -0.06669300 | 2.24081400  |
| H  | -7.75461900 | -1.48326600 | 4.29266100  |
| H  | -5.58277000 | -1.95254800 | 5.30969600  |
| Ni | 1.31367200  | 0.57834700  | -0.15006600 |
| Cl | 2.08834200  | 0.28787200  | 2.01108000  |
| C  | 2.59494900  | -1.06712800 | -1.29874200 |
| O  | 2.14066500  | -1.13586700 | -2.40021400 |
| C  | 3.73003700  | -1.87279600 | -0.79732900 |
| C  | 4.38717200  | -2.69430600 | -1.73654200 |
| C  | 4.11005600  | -1.89356100 | 0.54682800  |
| C  | 5.41620400  | -3.52765700 | -1.32196000 |
| H  | 4.07182100  | -2.66777300 | -2.77407900 |
| C  | 5.14121400  | -2.74032700 | 0.95278900  |
| H  | 3.58709200  | -1.26698500 | 1.25783500  |
| C  | 5.79258200  | -3.55354500 | 0.02689200  |
| H  | 5.92556000  | -4.16004500 | -2.04347800 |
| H  | 5.42989500  | -2.76397100 | 1.99917500  |
| H  | 6.59519200  | -4.21086500 | 0.35026800  |
| F  | 1.16421200  | 1.38433300  | -1.84435900 |

**TS1<sup>css</sup>**

|   |             |             |             |
|---|-------------|-------------|-------------|
| C | -0.41451400 | 1.06618700  | -0.80143200 |
| C | -1.75359600 | 0.53906800  | -1.25233200 |
| N | -0.01751200 | -1.06919500 | 0.49047700  |
| N | -2.42163200 | -0.40760800 | -0.71302800 |
| C | 0.39223900  | 0.01644300  | -0.06499800 |
| C | 1.16607300  | -1.76917800 | 1.04274700  |
| C | 2.21551400  | -0.61552300 | 1.08761900  |
| O | 1.69812100  | 0.30315200  | 0.06085100  |
| C | -3.78135300 | -0.43520300 | -1.29704100 |
| C | -3.63723700 | 0.55965100  | -2.50299300 |
| O | -2.36939200 | 1.23539800  | -2.23481300 |

|   |             |             |             |
|---|-------------|-------------|-------------|
| C | -0.77505300 | 2.27457500  | 0.17504200  |
| H | -1.64500100 | 1.98014700  | 0.76561700  |
| H | -1.08991100 | 3.09999700  | -0.47059500 |
| C | 0.42004100  | 1.60592200  | -2.00077700 |
| H | -0.24977400 | 2.21752300  | -2.61186600 |
| H | 1.16796400  | 2.27335100  | -1.58406400 |
| H | 0.94042400  | -2.08247900 | 2.06265800  |
| H | 2.09515400  | -0.08449200 | 2.03143200  |
| H | -3.97221300 | -1.44617200 | -1.66250500 |
| H | -3.47397700 | -0.01862700 | -3.41978700 |
| C | 1.55912700  | -2.96706400 | 0.21138100  |
| C | 2.49737100  | -5.11125600 | -1.32266900 |
| C | 2.41140000  | -3.92146700 | 0.77728000  |
| C | 1.63600100  | -4.17058800 | -1.88675100 |
| C | 2.88073200  | -4.98818500 | 0.01464400  |
| H | 2.72094100  | -3.81555800 | 1.81402500  |
| H | 1.31876200  | -4.26518700 | -2.91958000 |
| H | 3.54484600  | -5.72179300 | 0.46310400  |
| H | 2.86100200  | -5.94381200 | -1.91866200 |
| H | -7.36234900 | -1.52007900 | 1.48648600  |
| C | -6.64460100 | -0.76483100 | 1.18087200  |
| C | -4.76632000 | 1.14784600  | 0.41556400  |
| C | -6.61996900 | 0.47754700  | 1.81252100  |
| C | -5.67654900 | 1.43481400  | 1.42847300  |
| C | -4.79408100 | -0.09471300 | -0.22976200 |
| H | -7.32767600 | 0.70001300  | 2.60600500  |
| H | -5.65165700 | 2.40394800  | 1.91869700  |
| H | -4.04005800 | 1.89801500  | 0.11809700  |
| C | 4.75544100  | 1.25333300  | -2.53875900 |
| C | 3.38920600  | 1.33609400  | -2.36715400 |
| C | 2.50309800  | 0.42478100  | -2.99275800 |
| C | 3.06024000  | -0.62187700 | -3.79477600 |
| C | 4.46463700  | -0.67394200 | -3.95493700 |
| C | 5.29929800  | 0.24439600  | -3.34987800 |
| C | 1.06304100  | 0.52556400  | -2.85059600 |
| C | 2.18852400  | -1.60659600 | -4.41547500 |
| C | 0.78289100  | -1.46633100 | -4.25992800 |
| C | 0.26572300  | -0.37721900 | -3.49380900 |
| C | -0.08977000 | -2.41455900 | -4.84056400 |
| H | -1.16041500 | -2.29501600 | -4.69559700 |
| C | 0.40389000  | -3.48269900 | -5.56211800 |
| C | 1.79533300  | -3.62671500 | -5.72192500 |
| C | 2.66474000  | -2.70968100 | -5.16009600 |
| H | 5.40656700  | 1.96052200  | -2.03419900 |

|   |             |             |             |
|---|-------------|-------------|-------------|
| H | 3.00261700  | 2.10461500  | -1.71071300 |
| H | 4.90405900  | -1.44916400 | -4.57147000 |
| H | 6.37390300  | 0.17631500  | -3.49135000 |
| H | -0.81380100 | -0.28776100 | -3.43186000 |
| H | -0.27378200 | -4.21168800 | -5.99591800 |
| H | 2.19077000  | -4.46869400 | -6.28252400 |
| H | 3.73018400  | -2.85979500 | -5.28865500 |
| C | -5.73230400 | -1.04915300 | 0.16374300  |
| H | -5.72899100 | -2.02903500 | -0.30533300 |
| C | -4.74422000 | 1.55668400  | -2.71082500 |
| C | -4.53382000 | 2.93247700  | -2.60433500 |
| C | -6.02615900 | 1.07674600  | -3.00369900 |
| C | -5.59778700 | 3.81969200  | -2.77840500 |
| H | -3.54041900 | 3.30571000  | -2.38272600 |
| C | -7.08662400 | 1.96240600  | -3.17532600 |
| H | -6.19873900 | 0.00636300  | -3.07970800 |
| C | -6.87541500 | 3.33861200  | -3.06114600 |
| H | -5.42463900 | 4.88859500  | -2.69160000 |
| H | -8.07871500 | 1.57835700  | -3.39352700 |
| H | -7.70273300 | 4.02972200  | -3.19300700 |
| C | 1.16701100  | -3.10452300 | -1.12041200 |
| H | 0.48489600  | -2.38761300 | -1.55794600 |
| C | 3.66157900  | -0.92424000 | 0.87347500  |
| C | 4.15713700  | -1.38521400 | -0.35143000 |
| C | 4.53272000  | -0.78381600 | 1.95896400  |
| C | 5.50443400  | -1.71018500 | -0.47925200 |
| H | 3.49225200  | -1.49377500 | -1.19816500 |
| C | 5.88161200  | -1.11660900 | 1.83231800  |
| H | 4.14695700  | -0.41246300 | 2.90527300  |
| C | 6.36876300  | -1.58212600 | 0.61064600  |
| H | 5.87634600  | -2.06305100 | -1.43566300 |
| H | 6.54907800  | -1.00689800 | 2.68243800  |
| H | 7.41882100  | -1.84156600 | 0.50657200  |
| C | 4.48230600  | 5.30350200  | 1.43450900  |
| C | 3.29389900  | 5.00763800  | 0.79741000  |
| C | 2.41908400  | 4.02441100  | 1.31299100  |
| C | 2.75688700  | 3.33179200  | 2.50931300  |
| C | 3.98034300  | 3.65606200  | 3.13760200  |
| C | 4.82540600  | 4.61796700  | 2.61447100  |
| C | 1.21572200  | 3.68510700  | 0.61930200  |
| C | 1.83630100  | 2.32884200  | 3.02337500  |
| C | 0.63132200  | 2.03795000  | 2.31114500  |
| C | 0.36588400  | 2.71101100  | 1.05471100  |
| C | -0.24826200 | 1.05791100  | 2.83293900  |

|    |             |             |             |
|----|-------------|-------------|-------------|
| H  | -1.16826300 | 0.81709200  | 2.31439500  |
| C  | 0.05177900  | 0.35317400  | 3.98350700  |
| C  | 1.24720300  | 0.62173700  | 4.66998400  |
| C  | 2.10966100  | 1.59759300  | 4.20308300  |
| H  | 1.00328100  | 4.20953100  | -0.30965600 |
| H  | 5.14974400  | 6.05777200  | 1.02833600  |
| H  | 3.01518700  | 5.52385700  | -0.11796100 |
| H  | 4.27553800  | 3.14674300  | 4.04759800  |
| H  | 5.76016400  | 4.84376600  | 3.11925500  |
| H  | -0.62509900 | -0.41581000 | 4.34049200  |
| H  | 1.49306600  | 0.06463500  | 5.56920300  |
| H  | 3.01904300  | 1.79589100  | 4.75848800  |
| Ni | -1.85064200 | -1.57185200 | 0.75639800  |
| Cl | -1.88747100 | -4.44071900 | 0.38988500  |
| C  | -2.04515000 | -2.72274400 | 2.12038900  |
| O  | -3.21641100 | -2.29381100 | 2.07269500  |
| C  | -1.35446500 | -3.27082200 | 3.29917000  |
| C  | -1.78290500 | -2.84328700 | 4.56650900  |
| C  | -0.21228400 | -4.07598300 | 3.18553000  |
| C  | -1.05776600 | -3.19555600 | 5.70473000  |
| H  | -2.67616300 | -2.23060600 | 4.64015700  |
| C  | 0.50309100  | -4.42713100 | 4.32751900  |
| H  | 0.07117400  | -4.43557400 | 2.20317400  |
| C  | 0.09017500  | -3.98251900 | 5.58764800  |
| H  | -1.39325600 | -2.86188600 | 6.68311700  |
| H  | 1.38264500  | -5.05858900 | 4.23484400  |
| H  | 0.65253800  | -4.25995100 | 6.47511900  |

**(R)-TS2**<sup>doublet</sup>

|   |             |             |             |
|---|-------------|-------------|-------------|
| C | 0.35443800  | -1.83582900 | -0.55724700 |
| C | 0.56301000  | -0.35290700 | -0.75904600 |
| N | -0.41024500 | -1.39570400 | 1.79293600  |
| N | 0.48102700  | 0.62489900  | 0.07535200  |
| C | -0.07539000 | -2.18110600 | 0.83966600  |
| C | -1.05283200 | -2.22619200 | 2.84130700  |
| C | -0.55192600 | -3.65552800 | 2.47107600  |
| O | -0.22526200 | -3.50923000 | 1.05116900  |
| C | 0.77218900  | 1.87793600  | -0.68037500 |
| C | 0.67380600  | 1.39981000  | -2.16106700 |
| O | 0.89786400  | -0.04137400 | -2.02351300 |
| C | 1.66386500  | -2.58775100 | -0.95647400 |
| H | 1.70644800  | -2.57246300 | -2.04199100 |
| H | 1.53195800  | -3.63148900 | -0.65514900 |
| C | -0.83174500 | -2.41442000 | -1.46154000 |

|   |             |             |             |
|---|-------------|-------------|-------------|
| H | -0.67347300 | -3.49513000 | -1.47781700 |
| H | -1.77246600 | -2.25422300 | -0.93316300 |
| H | -0.66113900 | -1.92115000 | 3.81052100  |
| H | 0.39836500  | -3.84559900 | 2.98306300  |
| H | -0.03205600 | 2.57964400  | -0.46075100 |
| H | -0.36107300 | 1.50403200  | -2.48755500 |
| C | -2.55798200 | -2.07376300 | 2.82974800  |
| C | -5.35470600 | -1.87301700 | 2.88104700  |
| C | -3.26101400 | -2.27321900 | 4.02184300  |
| C | -4.65836200 | -1.65847400 | 1.69059500  |
| C | -4.65105100 | -2.17873000 | 4.04739700  |
| H | -2.71430000 | -2.47708100 | 4.93688900  |
| H | -5.19320900 | -1.40083500 | 0.78062900  |
| H | -5.18225500 | -2.32494800 | 4.98310000  |
| H | -6.43755500 | -1.78904300 | 2.90310500  |
| H | 3.53189400  | 5.59074000  | -0.25908800 |
| C | 3.44299400  | 4.51156900  | -0.17279700 |
| C | 3.19073100  | 1.74791700  | 0.08683200  |
| C | 4.54007100  | 3.74671400  | 0.22997100  |
| C | 4.41119500  | 2.36553600  | 0.35746400  |
| C | 2.09315600  | 2.50683300  | -0.31671500 |
| H | 5.48461800  | 4.22964400  | 0.46304300  |
| H | 5.24824100  | 1.76677100  | 0.69754700  |
| H | 3.08178800  | 0.67995300  | 0.22317400  |
| C | -3.04125200 | 1.18937900  | -2.42117200 |
| C | -2.38073400 | 0.00391600  | -2.15834400 |
| C | -1.65331800 | -0.67903600 | -3.16057800 |
| C | -1.60239300 | -0.12127000 | -4.47384400 |
| C | -2.29884000 | 1.08502400  | -4.71555000 |
| C | -3.00406300 | 1.73181300  | -3.71583000 |
| C | -0.91789400 | -1.89222500 | -2.86874700 |
| C | -0.82770100 | -0.78610700 | -5.51106100 |
| C | -0.18242900 | -2.01634100 | -5.20194200 |
| C | -0.26030900 | -2.53893900 | -3.87262800 |
| C | 0.56199500  | -2.68915700 | -6.19705700 |
| H | 1.04459000  | -3.62875700 | -5.93960200 |
| C | 0.68594600  | -2.16292200 | -7.46748400 |
| C | 0.06269800  | -0.93958800 | -7.77491400 |
| C | -0.67682000 | -0.26951500 | -6.81709000 |
| H | -3.55752900 | 1.69539900  | -1.61328200 |
| H | -2.40260800 | -0.37154400 | -1.14465200 |
| H | -2.28381500 | 1.52265500  | -5.70695500 |
| H | -3.52284500 | 2.66068400  | -3.93466100 |
| H | 0.26242000  | -3.46951900 | -3.66317900 |

|   |             |             |             |
|---|-------------|-------------|-------------|
| H | 1.26438500  | -2.68536900 | -8.22373700 |
| H | 0.16350800  | -0.51553600 | -8.76973000 |
| H | -1.13787200 | 0.67428900  | -7.08417700 |
| C | 2.22717500  | 3.89243000  | -0.44484500 |
| H | 1.36650100  | 4.48633000  | -0.73989700 |
| C | 1.58155700  | 1.97958000  | -3.20008300 |
| C | 1.03016500  | 2.80611200  | -4.18388500 |
| C | 2.95559000  | 1.71548200  | -3.21611900 |
| C | 1.84282500  | 3.38007100  | -5.16219900 |
| H | -0.04098700 | 2.98969100  | -4.18603400 |
| C | 3.76452500  | 2.27747500  | -4.19963800 |
| H | 3.39072100  | 1.07125800  | -2.46565000 |
| C | 3.21266200  | 3.11563200  | -5.17171600 |
| H | 1.40472100  | 4.02296300  | -5.92055600 |
| H | 4.82832100  | 2.05844800  | -4.20151100 |
| H | 3.84692300  | 3.55618700  | -5.93610000 |
| C | -3.26861500 | -1.76201400 | 1.66773200  |
| H | -2.73067800 | -1.54897700 | 0.75381400  |
| C | -1.50711300 | -4.78686000 | 2.69600500  |
| C | -2.49260500 | -5.11196200 | 1.75872900  |
| C | -1.46359100 | -5.47129500 | 3.91396000  |
| C | -3.42591900 | -6.10677600 | 2.04197700  |
| H | -2.52769500 | -4.58189500 | 0.81383800  |
| C | -2.40440200 | -6.45998700 | 4.20162100  |
| H | -0.69547200 | -5.22303200 | 4.64265900  |
| C | -3.38826500 | -6.77939600 | 3.26528200  |
| H | -4.18827000 | -6.35303800 | 1.30848700  |
| H | -2.36438900 | -6.98276800 | 5.15281900  |
| H | -4.12018100 | -7.55109600 | 3.48569200  |
| C | 5.32001400  | -0.84834600 | 3.74517200  |
| C | 4.20689300  | -1.33959800 | 3.09365000  |
| C | 4.18306400  | -1.43261700 | 1.68278500  |
| C | 5.29821600  | -0.99738000 | 0.91633100  |
| C | 6.42703800  | -0.50894700 | 1.61481500  |
| C | 6.43963500  | -0.43795000 | 2.99608000  |
| C | 3.03515700  | -1.95771500 | 1.01611400  |
| C | 5.21024200  | -1.04791100 | -0.53506700 |
| C | 4.02487500  | -1.54869000 | -1.16495900 |
| C | 2.92801900  | -2.02370700 | -0.34380100 |
| C | 3.96468500  | -1.55252100 | -2.58026700 |
| H | 3.06728300  | -1.88631800 | -3.08516300 |
| C | 5.01330800  | -1.09303400 | -3.35243400 |
| C | 6.17345000  | -0.59976900 | -2.73422600 |
| C | 6.26057800  | -0.57814600 | -1.35556300 |

|    |             |             |             |
|----|-------------|-------------|-------------|
| H  | 2.22726100  | -2.30914100 | 1.64840900  |
| H  | 5.32724800  | -0.76804500 | 4.82786700  |
| H  | 3.31831700  | -1.62346500 | 3.65045600  |
| H  | 7.30433800  | -0.17929200 | 1.07005800  |
| H  | 7.31987700  | -0.05549200 | 3.50488400  |
| H  | 4.92641800  | -1.09398700 | -4.43462000 |
| H  | 6.99900500  | -0.22949400 | -3.33516200 |
| H  | 7.15889700  | -0.18046300 | -0.89850700 |
| Ni | 0.29528800  | 0.51512500  | 2.05202900  |
| Cl | 0.74596100  | 0.03719500  | 4.19573100  |
| C  | 0.74279600  | 2.34800900  | 2.29759900  |
| O  | -0.09645800 | 3.14820900  | 1.89294000  |
| C  | 1.98857300  | 2.88938000  | 2.94715300  |
| C  | 2.09315300  | 4.27626200  | 3.13228700  |
| C  | 3.05567700  | 2.07082700  | 3.32601700  |
| C  | 3.22781300  | 4.82973000  | 3.71779900  |
| H  | 1.26856900  | 4.90079800  | 2.80485700  |
| C  | 4.19611800  | 2.62272200  | 3.90519000  |
| H  | 2.98937900  | 1.00434700  | 3.16567400  |
| C  | 4.28224300  | 4.00026600  | 4.11092500  |
| H  | 3.29668400  | 5.90535900  | 3.86057500  |
| H  | 5.01854600  | 1.97281500  | 4.18817300  |
| H  | 5.17039600  | 4.42917600  | 4.56840700  |
| C  | -2.86470100 | 1.91922600  | 1.82204800  |
| C  | -2.29897300 | 1.23985700  | 3.01096600  |
| H  | -3.96468500 | 1.95352000  | 1.84112100  |
| H  | -2.45197800 | 2.92421300  | 1.73515700  |
| H  | -2.62810900 | 0.26330700  | 3.32871900  |
| F  | -2.53605000 | 1.20466600  | 0.64642500  |
| O  | -1.90791800 | 2.08644900  | 4.00801100  |
| C  | -1.83155700 | 1.58140800  | 5.28672900  |
| O  | -2.39943300 | 0.56405000  | 5.62379500  |
| C  | -1.00434500 | 2.44349800  | 6.15711500  |
| C  | -0.24343700 | 3.50020500  | 5.64071800  |
| C  | -0.94800700 | 2.14030000  | 7.52345300  |
| C  | 0.57556100  | 4.24151000  | 6.48806400  |
| H  | -0.27805900 | 3.71420100  | 4.58107500  |
| C  | -0.13925400 | 2.89347500  | 8.36911800  |
| H  | -1.53405100 | 1.30709300  | 7.89622900  |
| C  | 0.62622500  | 3.94260600  | 7.85134400  |
| H  | 1.19018400  | 5.03593500  | 6.07633100  |
| H  | -0.09561400 | 2.65865600  | 9.42895600  |
| H  | 1.26848300  | 4.52103900  | 8.51018300  |



(S)-TS2<sup>doublet</sup>

|   |             |             |             |
|---|-------------|-------------|-------------|
| C | 0.84057200  | -1.56111700 | 0.37908500  |
| C | 1.02149900  | -0.24865300 | -0.33959700 |
| N | -0.96713000 | -0.56264900 | 1.81341400  |
| N | 0.23061800  | 0.75948800  | -0.38373700 |
| C | -0.09104600 | -1.46048700 | 1.55858600  |
| C | -1.69524000 | -0.98123600 | 3.04703600  |
| C | -0.75866500 | -2.09711400 | 3.60679400  |
| O | 0.02371900  | -2.48078800 | 2.43601600  |
| C | 0.80867100  | 1.76244500  | -1.31247300 |
| C | 2.12628500  | 1.06578700  | -1.82034000 |
| O | 2.14120400  | -0.18544600 | -1.07343700 |
| C | 2.23090100  | -2.07725600 | 0.82729400  |
| H | 2.78200200  | -2.28863400 | -0.08817300 |
| H | 2.08767000  | -3.03085400 | 1.34575900  |
| C | 0.15479400  | -2.59968600 | -0.61303500 |
| H | 0.11758800  | -3.54783600 | -0.06798500 |
| H | -0.87536300 | -2.27394900 | -0.77163800 |
| H | -1.72498300 | -0.12510200 | 3.71845000  |
| H | -0.03982700 | -1.64455600 | 4.30095500  |
| H | 0.11748200  | 1.85522500  | -2.14869900 |
| H | 2.00818300  | 0.78800900  | -2.86951500 |
| C | -3.10713500 | -1.41541600 | 2.73391800  |
| C | -5.73634700 | -2.16733400 | 2.13439000  |
| C | -4.18497100 | -0.75748400 | 3.33480500  |
| C | -4.66468100 | -2.83738900 | 1.54283600  |
| C | -5.49496900 | -1.12631100 | 3.03188500  |
| H | -3.99188200 | 0.07747600  | 4.00007000  |
| H | -4.84489600 | -3.63799000 | 0.83164200  |
| H | -6.32514400 | -0.58148800 | 3.46930500  |
| H | -6.75658900 | -2.44194500 | 1.88348500  |
| H | 0.69939900  | 6.41928200  | -1.39994600 |
| C | 0.92075600  | 5.52506100  | -0.82491900 |
| C | 1.43929700  | 3.22149800  | 0.65530400  |
| C | 1.37576900  | 5.63057200  | 0.48983600  |
| C | 1.63421500  | 4.47452200  | 1.23024700  |
| C | 0.98414900  | 3.10927800  | -0.66144700 |
| H | 1.52268000  | 6.60920900  | 0.93812100  |
| H | 1.99415700  | 4.54179900  | 2.25232500  |
| H | 1.64421900  | 2.32693000  | 1.22954000  |
| C | -0.49947700 | -0.05828900 | -4.09572900 |
| C | -0.32433500 | -0.92594300 | -3.03390700 |
| C | 0.67959400  | -1.92130200 | -3.04799100 |
| C | 1.50803700  | -2.04836100 | -4.20613900 |

|   |             |             |             |
|---|-------------|-------------|-------------|
| C | 1.30709400  | -1.14361400 | -5.27370200 |
| C | 0.33094800  | -0.16400700 | -5.22249300 |
| C | 0.89533000  | -2.79803400 | -1.91258100 |
| C | 2.52270000  | -3.09070400 | -4.25987400 |
| C | 2.65886900  | -3.97215000 | -3.15088300 |
| C | 1.83038200  | -3.78812700 | -1.99980100 |
| C | 3.62695700  | -5.00135500 | -3.18410100 |
| H | 3.71202700  | -5.66311900 | -2.32552500 |
| C | 4.45145300  | -5.16541600 | -4.27910500 |
| C | 4.32496700  | -4.29504300 | -5.37755100 |
| C | 3.38201800  | -3.28302400 | -5.36532700 |
| H | -1.28845000 | 0.68414600  | -4.04644300 |
| H | -0.98142500 | -0.82980900 | -2.18282700 |
| H | 1.92582500  | -1.21507500 | -6.16081400 |
| H | 0.20021500  | 0.51227200  | -6.06260100 |
| H | 1.97878400  | -4.46128600 | -1.15792600 |
| H | 5.19304200  | -5.95874400 | -4.29430200 |
| H | 4.97107800  | -4.41709500 | -6.24211200 |
| H | 3.31017100  | -2.63049900 | -6.22777900 |
| C | 0.72523700  | 4.26795700  | -1.39581400 |
| H | 0.34575500  | 4.18440000  | -2.41082400 |
| C | 3.41078100  | 1.81689200  | -1.61032000 |
| C | 4.16651500  | 1.66145900  | -0.44617700 |
| C | 3.81893200  | 2.74060900  | -2.57688200 |
| C | 5.31509300  | 2.42495000  | -0.24678100 |
| H | 3.85893300  | 0.94066700  | 0.29743000  |
| C | 4.96291600  | 3.51132400  | -2.37438500 |
| H | 3.23533100  | 2.86198700  | -3.48641500 |
| C | 5.71385900  | 3.35532300  | -1.20733800 |
| H | 5.88959500  | 2.29161800  | 0.66493700  |
| H | 5.26992100  | 4.22980700  | -3.12914500 |
| H | 6.60646700  | 3.95447500  | -1.05076200 |
| C | -3.35675300 | -2.45972900 | 1.83815200  |
| H | -2.53160400 | -2.96121700 | 1.34564800  |
| C | -1.41451700 | -3.29035900 | 4.24051700  |
| C | -2.10805100 | -3.10652300 | 5.44202700  |
| C | -1.37588000 | -4.55751100 | 3.65662500  |
| C | -2.76569100 | -4.17554800 | 6.04537600  |
| H | -2.14427600 | -2.12079500 | 5.89910600  |
| C | -2.03130900 | -5.62943200 | 4.26454600  |
| H | -0.83551400 | -4.70051400 | 2.72783500  |
| C | -2.72968100 | -5.44180000 | 5.45672700  |
| H | -3.30814400 | -4.02006600 | 6.97335200  |
| H | -1.99707800 | -6.61169200 | 3.80180100  |

|    |             |             |             |
|----|-------------|-------------|-------------|
| H  | -3.24292500 | -6.27586100 | 5.92640000  |
| C  | 3.31729200  | 2.89940100  | 4.43734200  |
| C  | 2.58821600  | 1.93292600  | 3.77314900  |
| C  | 3.23961500  | 0.86786800  | 3.10862900  |
| C  | 4.65662600  | 0.77455200  | 3.13101100  |
| C  | 5.37531800  | 1.78057600  | 3.81662100  |
| C  | 4.72275600  | 2.82118900  | 4.45300600  |
| C  | 2.47553700  | -0.09405800 | 2.37525700  |
| C  | 5.28869800  | -0.34122600 | 2.44260500  |
| C  | 4.48494800  | -1.28694500 | 1.73229900  |
| C  | 3.04379500  | -1.12424600 | 1.68289900  |
| C  | 5.12702100  | -2.36287800 | 1.07402200  |
| H  | 4.53337600  | -3.09505400 | 0.53961900  |
| C  | 6.50029300  | -2.50958000 | 1.09741800  |
| C  | 7.29010900  | -1.57554800 | 1.78688200  |
| C  | 6.69064000  | -0.51804300 | 2.44394200  |
| H  | 1.40609700  | 0.07183400  | 2.35894000  |
| H  | 2.80996600  | 3.71533600  | 4.94368700  |
| H  | 1.50235600  | 1.98530300  | 3.73977000  |
| H  | 6.45841200  | 1.74900400  | 3.84909700  |
| H  | 5.30113900  | 3.58185100  | 4.96924900  |
| H  | 6.96547000  | -3.34455700 | 0.58188800  |
| H  | 8.37064700  | -1.68295000 | 1.80722700  |
| H  | 7.31894300  | 0.18590400  | 2.97720600  |
| Ni | -1.37339500 | 1.13613100  | 0.71535400  |
| Cl | -2.34215800 | 2.10312000  | 2.49320400  |
| C  | -2.08991200 | 2.24852500  | -0.64451000 |
| O  | -2.16381000 | 1.69760900  | -1.74432400 |
| C  | -2.59789200 | 3.64999600  | -0.51786100 |
| C  | -3.57331200 | 4.09026100  | -1.42645300 |
| C  | -2.09568400 | 4.53709400  | 0.43944900  |
| C  | -4.06103000 | 5.39235900  | -1.35970100 |
| H  | -3.93406600 | 3.39299100  | -2.17603100 |
| C  | -2.56252200 | 5.84932800  | 0.48528000  |
| H  | -1.33453900 | 4.19812100  | 1.12872700  |
| C  | -3.55211600 | 6.27590700  | -0.40269000 |
| H  | -4.82987600 | 5.72289800  | -2.05321900 |
| H  | -2.15549800 | 6.53805500  | 1.22023600  |
| H  | -3.92623600 | 7.29519700  | -0.35195900 |
| C  | -4.35412100 | 0.51896600  | 0.13525900  |
| H  | -3.84293200 | -0.21243100 | 0.73663400  |
| C  | -5.29399800 | 1.51930800  | 0.66703700  |
| H  | -5.45208700 | 2.33459300  | -0.04608600 |
| H  | -4.90238400 | 1.91530700  | 1.60513800  |

|   |             |             |             |
|---|-------------|-------------|-------------|
| F | -6.55859800 | 0.93321200  | 0.92457300  |
| O | -4.47978600 | 0.23969900  | -1.19442500 |
| C | -3.68868300 | -0.72988500 | -1.72797200 |
| O | -2.98236700 | -1.45712400 | -1.04935000 |
| C | -3.79789800 | -0.79326900 | -3.19945900 |
| C | -3.29720600 | -1.92751600 | -3.85158200 |
| C | -4.31555600 | 0.27287800  | -3.94750200 |
| C | -3.31472900 | -1.99832700 | -5.24088600 |
| H | -2.88311800 | -2.73271100 | -3.25523500 |
| C | -4.31922700 | 0.20314000  | -5.33839500 |
| H | -4.68654900 | 1.15079700  | -3.43328700 |
| C | -3.82035200 | -0.93061000 | -5.98603100 |
| H | -2.92087100 | -2.87669400 | -5.74326400 |
| H | -4.70767800 | 1.03471600  | -5.91918100 |
| H | -3.82350700 | -0.97999600 | -7.07139000 |

**(R)-TS3**<sup>doublet</sup>

|   |             |             |             |
|---|-------------|-------------|-------------|
| C | -1.87417000 | 0.34946100  | 0.04047300  |
| C | -0.82665000 | -0.44760400 | -0.70984300 |
| N | -0.19389300 | 1.25675400  | 1.64517300  |
| N | 0.44134500  | -0.50075100 | -0.53340800 |
| C | -1.38641900 | 0.89998200  | 1.35706400  |
| C | -0.20139900 | 1.93429400  | 2.95471100  |
| C | -1.67061200 | 1.68723900  | 3.45655200  |
| O | -2.34643100 | 1.17400600  | 2.26004500  |
| C | 1.03898500  | -1.28362100 | -1.63924900 |
| C | -0.22140800 | -1.72302900 | -2.48554800 |
| O | -1.33165100 | -1.13402900 | -1.74307300 |
| C | -3.14680700 | -0.51619400 | 0.19385800  |
| H | -3.55670300 | -0.60932300 | -0.81152400 |
| H | -3.87167300 | 0.05210700  | 0.78682200  |
| C | -2.24071500 | 1.66024200  | -0.79564500 |
| H | -3.12091800 | 2.08443800  | -0.30323700 |
| H | -1.42492100 | 2.37184100  | -0.66000100 |
| H | 0.50240900  | 1.41515900  | 3.60932300  |
| H | -1.67262200 | 0.86362700  | 4.17559200  |
| H | 1.62639200  | -0.57892900 | -2.23252000 |
| H | -0.20621300 | -1.21886800 | -3.45382400 |
| C | 0.23061000  | 3.37909200  | 2.81821600  |
| C | 1.08610100  | 6.04055500  | 2.61145700  |
| C | 0.84801600  | 4.01080700  | 3.90253800  |
| C | 0.47280100  | 5.41702300  | 1.52502600  |
| C | 1.26845900  | 5.33464300  | 3.80134200  |
| H | 1.03390900  | 3.44809900  | 4.81055900  |

|   |             |             |             |
|---|-------------|-------------|-------------|
| H | 0.33173200  | 5.95671000  | 0.59254300  |
| H | 1.76066900  | 5.80807000  | 4.64567600  |
| H | 1.43010400  | 7.06741500  | 2.52795400  |
| H | 4.77847300  | -3.99699700 | -2.17426800 |
| C | 3.88828600  | -3.78103600 | -1.59104400 |
| C | 1.62435400  | -3.18438700 | -0.07391200 |
| C | 3.56880500  | -4.56069900 | -0.47776900 |
| C | 2.43810000  | -4.25711600 | 0.28171200  |
| C | 1.93740700  | -2.40333200 | -1.18701100 |
| H | 4.20491000  | -5.39650200 | -0.19887600 |
| H | 2.18086100  | -4.85084900 | 1.15367300  |
| H | 0.75836500  | -2.94483900 | 0.52687500  |
| C | 0.91949400  | 1.59339000  | -3.78035800 |
| C | -0.11500300 | 1.69702300  | -2.86896700 |
| C | -1.45291600 | 1.40835400  | -3.22821900 |
| C | -1.73779000 | 1.03997900  | -4.57925300 |
| C | -0.65892000 | 0.94291600  | -5.48796600 |
| C | 0.64347300  | 1.20339300  | -5.10122000 |
| C | -2.52824900 | 1.44314000  | -2.25653700 |
| C | -3.11039300 | 0.76884800  | -4.98178900 |
| C | -4.14529700 | 0.88525000  | -4.01212400 |
| C | -3.81079500 | 1.21925900  | -2.66270500 |
| C | -5.48724300 | 0.64019500  | -4.38101500 |
| H | -6.26078600 | 0.73435400  | -3.62287600 |
| C | -5.81316000 | 0.28143600  | -5.67348300 |
| C | -4.79438300 | 0.15997700  | -6.63641200 |
| C | -3.47520700 | 0.39901700  | -6.29595000 |
| H | 1.93297600  | 1.79870000  | -3.45336300 |
| H | 0.13425600  | 1.98258700  | -1.85550600 |
| H | -0.84803100 | 0.65585000  | -6.51577000 |
| H | 1.44950400  | 1.11284800  | -5.82377500 |
| H | -4.62090500 | 1.27015600  | -1.93846600 |
| H | -6.84705700 | 0.09227700  | -5.94666700 |
| H | -5.04344500 | -0.12310600 | -7.65498400 |
| H | -2.71553800 | 0.29818900  | -7.06236700 |
| C | 3.07516700  | -2.70506700 | -1.94066200 |
| H | 3.33499700  | -2.08209800 | -2.79280100 |
| C | -0.44155300 | -3.19761200 | -2.66134700 |
| C | -1.10994600 | -3.95348300 | -1.69490200 |
| C | 0.08972300  | -3.83388700 | -3.78628100 |
| C | -1.24147900 | -5.33154400 | -1.84870900 |
| H | -1.52842500 | -3.46355300 | -0.82743400 |
| C | -0.03382600 | -5.21467800 | -3.93746800 |
| H | 0.60730100  | -3.24767300 | -4.54206600 |

|    |             |             |             |
|----|-------------|-------------|-------------|
| C  | -0.69988500 | -5.96647200 | -2.96768100 |
| H  | -1.76086900 | -5.90310400 | -1.08567300 |
| H  | 0.38549500  | -5.70166400 | -4.81337700 |
| H  | -0.79797800 | -7.04199200 | -3.08606500 |
| C  | 0.04443300  | 4.09398900  | 1.63082800  |
| H  | -0.41690300 | 3.60935000  | 0.77732400  |
| C  | -2.39740400 | 2.87492000  | 4.01065100  |
| C  | -2.38313600 | 3.09433800  | 5.39058400  |
| C  | -3.01535200 | 3.80803700  | 3.17255700  |
| C  | -2.96936400 | 4.23962500  | 5.92919000  |
| H  | -1.90582900 | 2.36859600  | 6.04461600  |
| C  | -3.61069500 | 4.94675800  | 3.71081900  |
| H  | -3.02947800 | 3.63918500  | 2.10121700  |
| C  | -3.58516900 | 5.16816500  | 5.08946800  |
| H  | -2.94987000 | 4.40209000  | 7.00290100  |
| H  | -4.09038700 | 5.66578900  | 3.05292100  |
| H  | -4.04567900 | 6.05903200  | 5.50665800  |
| C  | -0.21499100 | -5.17893900 | 3.13086400  |
| C  | -0.48722300 | -3.87973500 | 2.74889500  |
| C  | -1.64202600 | -3.58115400 | 1.98852700  |
| C  | -2.54167800 | -4.61985700 | 1.62478200  |
| C  | -2.23362000 | -5.93871500 | 2.03077600  |
| C  | -1.09451500 | -6.21473100 | 2.76520400  |
| C  | -1.88023800 | -2.23925800 | 1.54055600  |
| C  | -3.72222700 | -4.27796100 | 0.84697200  |
| C  | -3.92923700 | -2.92732800 | 0.42916900  |
| C  | -2.95348400 | -1.90618300 | 0.76503800  |
| C  | -5.09046800 | -2.62363700 | -0.32179000 |
| H  | -5.27666000 | -1.60283100 | -0.63350600 |
| C  | -6.00750600 | -3.59762400 | -0.66596600 |
| C  | -5.79586700 | -4.92692000 | -0.26698400 |
| C  | -4.67669300 | -5.25157800 | 0.47519700  |
| H  | -1.12430400 | -1.50950700 | 1.81424900  |
| H  | 0.67755900  | -5.39881800 | 3.70963500  |
| H  | 0.19300100  | -3.07116400 | 2.99862400  |
| H  | -2.89221200 | -6.75794300 | 1.76514400  |
| H  | -0.88064500 | -7.23834300 | 3.05977100  |
| H  | -6.88826700 | -3.33343200 | -1.24400600 |
| H  | -6.51037900 | -5.69924800 | -0.53654700 |
| H  | -4.53759700 | -6.28156100 | 0.78220300  |
| Ni | 1.54910800  | 0.53264300  | 0.82624300  |
| Cl | 1.69235300  | -1.03722500 | 2.55174600  |
| C  | 3.13383200  | 0.76444300  | -0.13489300 |
| O  | 2.72865900  | 1.45452600  | -1.08283900 |

|   |            |             |             |
|---|------------|-------------|-------------|
| C | 4.35214700 | -0.07404400 | -0.20987500 |
| C | 5.23163500 | 0.14139800  | -1.28382300 |
| C | 4.61489300 | -1.09201900 | 0.71549600  |
| C | 6.36980700 | -0.64651100 | -1.42315100 |
| H | 5.00251100 | 0.92800400  | -1.99585100 |
| C | 5.75391300 | -1.87949800 | 0.56756100  |
| H | 3.91553200 | -1.27269100 | 1.52199300  |
| C | 6.63300100 | -1.65798800 | -0.49411400 |
| H | 7.05164800 | -0.47488400 | -2.25159900 |
| H | 5.94721200 | -2.67453200 | 1.28123000  |
| H | 7.52000300 | -2.27643000 | -0.60392900 |
| C | 3.64251200 | 3.11915600  | 1.00511300  |
| C | 3.09172700 | 1.86227800  | 1.62500100  |
| H | 4.59988000 | 2.93704200  | 0.50543800  |
| H | 2.91970600 | 3.51920900  | 0.28971300  |
| H | 2.24878900 | 2.14545600  | 2.25388000  |
| F | 3.85600300 | 4.07419400  | 2.00102700  |
| O | 4.06476700 | 1.23420500  | 2.43543100  |
| C | 3.79432900 | 1.09729300  | 3.75768700  |
| O | 2.83552400 | 1.59935700  | 4.31201000  |
| C | 4.82143400 | 0.27283800  | 4.44316700  |
| C | 5.96449000 | -0.19511500 | 3.78233900  |
| C | 4.61671600 | -0.04036700 | 5.79234400  |
| C | 6.89126900 | -0.97590700 | 4.46990700  |
| H | 6.11480000 | 0.04660300  | 2.73816600  |
| C | 5.54408900 | -0.82240700 | 6.47510800  |
| H | 3.72298100 | 0.33235300  | 6.28047300  |
| C | 6.68276500 | -1.29150300 | 5.81448700  |
| H | 7.77613500 | -1.33929700 | 3.95493900  |
| H | 5.38045900 | -1.06914600 | 7.52025900  |
| H | 7.40616500 | -1.90265900 | 6.34748900  |

(S)-TS3<sup>doublet</sup>

|   |             |             |             |
|---|-------------|-------------|-------------|
| C | -1.87613300 | 0.38002900  | -0.11730200 |
| C | -0.73410000 | -0.42394700 | -0.70458600 |
| N | -0.51386200 | 1.10883500  | 1.85083200  |
| N | 0.49880400  | -0.49016700 | -0.36008600 |
| C | -1.62893500 | 0.86742500  | 1.28912800  |
| C | -0.77306900 | 1.57134800  | 3.22953100  |
| C | -2.34204700 | 1.72299000  | 3.26316600  |
| O | -2.75537200 | 1.13595000  | 1.99619000  |
| C | 1.21819700  | -1.33620100 | -1.34152700 |
| C | 0.09032400  | -1.71970200 | -2.37700700 |
| O | -1.10255300 | -1.11967100 | -1.78847600 |

|   |             |             |             |
|---|-------------|-------------|-------------|
| C | -3.15455300 | -0.49345500 | -0.18908300 |
| H | -3.38140000 | -0.59999600 | -1.24855400 |
| H | -3.97757500 | 0.06813800  | 0.26492600  |
| C | -2.07072700 | 1.70968800  | -0.97102200 |
| H | -2.98219600 | 2.17415400  | -0.58312000 |
| H | -1.23742100 | 2.36992800  | -0.72438200 |
| H | -0.47194300 | 0.74852900  | 3.88160400  |
| H | -2.75659100 | 1.08239700  | 4.04524100  |
| H | 1.94686300  | -0.69417900 | -1.84132700 |
| H | 0.25928000  | -1.19227100 | -3.31759200 |
| C | 0.06259300  | 2.77804400  | 3.57870400  |
| C | 1.75624000  | 4.92780500  | 4.18062900  |
| C | 0.93052300  | 2.71225500  | 4.67247500  |
| C | 0.88393900  | 5.00548000  | 3.09170100  |
| C | 1.77731600  | 3.78079500  | 4.97200200  |
| H | 0.97562400  | 1.79982000  | 5.26024800  |
| H | 0.87147700  | 5.89163500  | 2.46396900  |
| H | 2.46996000  | 3.70360900  | 5.80408200  |
| H | 2.42588800  | 5.75383600  | 4.40172100  |
| H | 4.60910000  | -4.52032000 | -1.33806000 |
| C | 3.71615800  | -4.14334100 | -0.84823200 |
| C | 1.45054500  | -3.13574000 | 0.42547900  |
| C | 3.22134300  | -4.77361700 | 0.29585300  |
| C | 2.09085900  | -4.26415600 | 0.93372900  |
| C | 1.93637000  | -2.50649300 | -0.71975800 |
| H | 3.72297600  | -5.65234200 | 0.69229300  |
| H | 1.69712100  | -4.73866600 | 1.82697100  |
| H | 0.58587600  | -2.73385000 | 0.93319200  |
| C | 1.36682100  | 1.49391500  | -3.64045300 |
| C | 0.25475800  | 1.63473800  | -2.83088600 |
| C | -1.05420900 | 1.42131400  | -3.32404100 |
| C | -1.22470100 | 1.08330500  | -4.70175400 |
| C | -0.06787200 | 0.94136400  | -5.50268300 |
| C | 1.20211200  | 1.13401300  | -4.98846600 |
| C | -2.21424700 | 1.50736600  | -2.45833000 |
| C | -2.56338800 | 0.89153800  | -5.23995200 |
| C | -3.67965900 | 1.05022100  | -4.37175900 |
| C | -3.46060800 | 1.35267600  | -2.99134000 |
| C | -4.99052200 | 0.88376700  | -4.87309800 |
| H | -5.82812600 | 1.01009400  | -4.19142700 |
| C | -5.20814900 | 0.56317300  | -6.19809500 |
| C | -4.10871600 | 0.40116000  | -7.06127000 |
| C | -2.81808400 | 0.56228000  | -6.59042800 |
| H | 2.35205200  | 1.64839000  | -3.21283800 |



|   |             |             |             |
|---|-------------|-------------|-------------|
| H | 0.41282900  | 1.89759400  | -1.79489900 |
| H | -0.16968700 | 0.67403400  | -6.54820200 |
| H | 2.06878000  | 1.01251500  | -5.63218000 |
| H | -4.33359900 | 1.43900900  | -2.34789100 |
| H | -6.21936800 | 0.43555800  | -6.57316600 |
| H | -4.27248000 | 0.14818100  | -8.10480200 |
| H | -1.99372300 | 0.43254900  | -7.28212900 |
| C | 3.07571400  | -3.01396600 | -1.35147100 |
| H | 3.47035900  | -2.51213900 | -2.23108900 |
| C | -0.15026100 | -3.17906200 | -2.62872300 |
| C | -0.84757600 | -3.96478000 | -1.70538200 |
| C | 0.36665500  | -3.77059600 | -3.78338400 |
| C | -1.02262000 | -5.32642400 | -1.93431900 |
| H | -1.25664800 | -3.51016500 | -0.81374200 |
| C | 0.20139600  | -5.13769500 | -4.00908500 |
| H | 0.90076700  | -3.15897600 | -4.50696200 |
| C | -0.49429500 | -5.91755700 | -3.08429400 |
| H | -1.56890700 | -5.92116700 | -1.20864200 |
| H | 0.60856600  | -5.59006000 | -4.90900000 |
| H | -0.62777600 | -6.98122200 | -3.26116000 |
| C | 0.04429100  | 3.93633100  | 2.79124200  |
| H | -0.61126300 | 3.99103800  | 1.93047400  |
| C | -2.88481400 | 3.12247700  | 3.40209800  |
| C | -2.78613500 | 3.75696700  | 4.64586500  |
| C | -3.43523500 | 3.81713400  | 2.32342300  |
| C | -3.21197900 | 5.07317200  | 4.80283600  |
| H | -2.35032400 | 3.22535300  | 5.48767700  |
| C | -3.86625800 | 5.13567300  | 2.48109000  |
| H | -3.52985500 | 3.32441900  | 1.36273600  |
| C | -3.75190000 | 5.76867600  | 3.71827700  |
| H | -3.12061500 | 5.55730300  | 5.77077200  |
| H | -4.29125200 | 5.66680900  | 1.63396700  |
| H | -4.08344800 | 6.79585700  | 3.83953600  |
| C | -0.74979000 | -4.97101500 | 3.43077700  |
| C | -0.95831200 | -3.69946200 | 2.93362900  |
| C | -1.94641400 | -3.46891000 | 1.94811000  |
| C | -2.74011700 | -4.54389000 | 1.46551100  |
| C | -2.49796500 | -5.83376500 | 1.99159400  |
| C | -1.52486900 | -6.04422200 | 2.95204600  |
| C | -2.12072200 | -2.15530400 | 1.40507800  |
| C | -3.74838700 | -4.26350100 | 0.45458000  |
| C | -3.90048700 | -2.93394800 | -0.04924800 |
| C | -3.03644200 | -1.87208400 | 0.43267700  |
| C | -4.89310000 | -2.69289100 | -1.02929900 |

|    |             |             |             |
|----|-------------|-------------|-------------|
| H  | -5.03487300 | -1.69019800 | -1.41443900 |
| C  | -5.69712500 | -3.70693600 | -1.51239800 |
| C  | -5.53854300 | -5.01447100 | -1.02647000 |
| C  | -4.58475800 | -5.27846600 | -0.06235500 |
| H  | -1.44273100 | -1.39969500 | 1.78488000  |
| H  | 0.01390200  | -5.14222400 | 4.18400300  |
| H  | -0.34777600 | -2.86353400 | 3.26618800  |
| H  | -3.07710700 | -6.68160400 | 1.64361800  |
| H  | -1.35879900 | -7.04661300 | 3.33657500  |
| H  | -6.44751100 | -3.49086500 | -2.26727000 |
| H  | -6.16439900 | -5.81793600 | -1.40392000 |
| H  | -4.48448500 | -6.29305700 | 0.30542700  |
| Ni | 1.43686300  | 0.59840400  | 1.06150900  |
| Cl | 1.47336700  | -0.83702700 | 2.99815400  |
| C  | 3.22728800  | 0.64559600  | 0.20234300  |
| O  | 3.19214400  | 1.29441500  | -0.84367300 |
| C  | 4.31840500  | -0.36700700 | 0.39425400  |
| C  | 5.35110700  | -0.35412100 | -0.56149600 |
| C  | 4.34727700  | -1.32222700 | 1.41688500  |
| C  | 6.39329700  | -1.27216000 | -0.48906000 |
| H  | 5.31283600  | 0.38714900  | -1.35193400 |
| C  | 5.39118400  | -2.24299700 | 1.48148300  |
| H  | 3.53826400  | -1.36409300 | 2.13470400  |
| C  | 6.41559500  | -2.22263400 | 0.53517900  |
| H  | 7.18792600  | -1.24817400 | -1.23015900 |
| H  | 5.38950000  | -2.99127100 | 2.26835400  |
| H  | 7.22492500  | -2.94597100 | 0.59007000  |
| C  | 4.30722700  | 1.81144600  | 2.49070300  |
| C  | 2.99390600  | 1.94953900  | 1.78771800  |
| H  | 5.15228400  | 1.90540400  | 1.80199600  |
| H  | 4.34143900  | 0.84119500  | 2.99062600  |
| H  | 2.20212800  | 1.97834000  | 2.54125900  |
| F  | 4.43827900  | 2.81549400  | 3.46047000  |
| O  | 2.98357000  | 3.18545900  | 1.07030800  |
| C  | 1.95156100  | 3.42305000  | 0.27057700  |
| O  | 1.00700200  | 2.64220500  | 0.13265200  |
| C  | 2.01079000  | 4.74217500  | -0.39363700 |
| C  | 2.95122900  | 5.70647100  | -0.00488900 |
| C  | 1.08637000  | 5.03038500  | -1.40607400 |
| C  | 2.96204300  | 6.95171800  | -0.62829300 |
| H  | 3.65434300  | 5.47237600  | 0.78585500  |
| C  | 1.10828300  | 6.27349200  | -2.03224900 |
| H  | 0.37072800  | 4.27243700  | -1.70193300 |
| C  | 2.04321600  | 7.23568500  | -1.64206100 |

|                                  |             |             |             |
|----------------------------------|-------------|-------------|-------------|
| H                                | 3.68685900  | 7.70128200  | -0.32472500 |
| H                                | 0.39784700  | 6.49247500  | -2.82382800 |
| H                                | 2.05631400  | 8.20706100  | -2.12844400 |
| <b>(R)-TS4<sup>doublet</sup></b> |             |             |             |
| C                                | -1.78205000 | 1.17430000  | -0.42252400 |
| C                                | -1.33485900 | -0.27047100 | -0.50619600 |
| N                                | 0.51143000  | 2.05085700  | 0.06242000  |
| N                                | -0.15097600 | -0.75579200 | -0.51551200 |
| C                                | -0.75642100 | 2.08035700  | 0.21353100  |
| C                                | 1.08436500  | 3.20799000  | 0.78835500  |
| C                                | -0.12068000 | 3.66232400  | 1.67366700  |
| O                                | -1.26088000 | 3.07553600  | 0.97868400  |
| C                                | -0.24925100 | -2.21101100 | -0.78269100 |
| C                                | -1.80349800 | -2.45809900 | -0.87599900 |
| O                                | -2.35545800 | -1.12797900 | -0.66793600 |
| C                                | -3.12166900 | 1.23252000  | 0.34479100  |
| H                                | -3.84913300 | 0.71247700  | -0.27762800 |
| H                                | -3.43885100 | 2.27945400  | 0.40036300  |
| C                                | -1.95704100 | 1.73019900  | -1.90485500 |
| H                                | -2.34172100 | 2.75009800  | -1.79493800 |
| H                                | -0.95628500 | 1.79570400  | -2.33484000 |
| H                                | 1.88534400  | 2.83868000  | 1.42895500  |
| H                                | -0.05786100 | 3.14280200  | 2.63567400  |
| H                                | 0.18096900  | -2.37666800 | -1.77082200 |
| H                                | -2.06645500 | -2.73757900 | -1.89843100 |
| C                                | 1.61391300  | 4.25505800  | -0.16171800 |
| C                                | 2.62786200  | 6.21734200  | -1.88950700 |
| C                                | 0.87512300  | 4.66851000  | -1.27718400 |
| C                                | 3.36798500  | 5.81295700  | -0.77843800 |
| C                                | 1.37822500  | 5.64309900  | -2.13656300 |
| H                                | -0.08640100 | 4.21111000  | -1.48702300 |
| H                                | 4.34325500  | 6.24907900  | -0.58299600 |
| H                                | 0.79808400  | 5.95151500  | -3.00168400 |
| H                                | 3.02237800  | 6.97332100  | -2.56232700 |
| H                                | 1.04537600  | -3.33272500 | 3.56120100  |
| C                                | 1.10724700  | -3.56753200 | 2.50286300  |
| C                                | 1.25495000  | -4.13683300 | -0.21822600 |
| C                                | 1.87328100  | -4.64708200 | 2.05759400  |
| C                                | 1.94316000  | -4.93502800 | 0.69420200  |
| C                                | 0.49631100  | -3.04897300 | 0.22149900  |
| H                                | 2.41993000  | -5.25828700 | 2.77038400  |
| H                                | 2.55077400  | -5.76223700 | 0.33950300  |
| H                                | 1.32983700  | -4.33935600 | -1.28387100 |

|   |             |             |             |
|---|-------------|-------------|-------------|
| C | -0.63939100 | -1.66276300 | -4.30487900 |
| C | -1.06621900 | -0.52858600 | -3.63847700 |
| C | -2.44292100 | -0.22144000 | -3.52013500 |
| C | -3.39962000 | -1.07804500 | -4.14848600 |
| C | -2.92837600 | -2.23354700 | -4.81339300 |
| C | -1.57939900 | -2.53118900 | -4.88447300 |
| C | -2.90209200 | 0.92690600  | -2.76253900 |
| C | -4.81608600 | -0.74725200 | -4.09293100 |
| C | -5.21636500 | 0.43744300  | -3.41365300 |
| C | -4.23056800 | 1.23858400  | -2.75743800 |
| C | -6.58374300 | 0.79106900  | -3.36070800 |
| H | -6.86592900 | 1.70036500  | -2.83544400 |
| C | -7.54506700 | -0.00063100 | -3.95613700 |
| C | -7.15691200 | -1.17584300 | -4.62588200 |
| C | -5.82346000 | -1.53757600 | -4.69137700 |
| H | 0.42451400  | -1.87115600 | -4.36516000 |
| H | -0.31159500 | 0.11641400  | -3.20568300 |
| H | -3.63514600 | -2.90694500 | -5.28425000 |
| H | -1.25112500 | -3.42866700 | -5.40142900 |
| H | -4.57445500 | 2.11290900  | -2.20876300 |
| H | -8.59352100 | 0.27866900  | -3.90786900 |
| H | -7.90796900 | -1.80426500 | -5.09578300 |
| H | -5.55819800 | -2.44725700 | -5.21757700 |
| C | 0.42158700  | -2.77355900 | 1.58887800  |
| H | -0.15531600 | -1.92798200 | 1.93614500  |
| C | -2.38312200 | -3.43797200 | 0.10628500  |
| C | -2.93073500 | -3.02644500 | 1.32259900  |
| C | -2.30037200 | -4.80379600 | -0.18344700 |
| C | -3.37647000 | -3.96966800 | 2.24764100  |
| H | -3.00736000 | -1.97217700 | 1.54397600  |
| C | -2.74010800 | -5.74731200 | 0.74282200  |
| H | -1.87678300 | -5.12914500 | -1.13061600 |
| C | -3.27709500 | -5.33170800 | 1.96356900  |
| H | -3.79027200 | -3.63067600 | 3.19249100  |
| H | -2.66431900 | -6.80613500 | 0.51171600  |
| H | -3.61797800 | -6.06744200 | 2.68667100  |
| C | 2.86092200  | 4.83649900  | 0.08029600  |
| H | 3.44323200  | 4.51137400  | 0.93856800  |
| C | -0.29819500 | 5.13720500  | 1.87193800  |
| C | -1.17210600 | 5.89096900  | 1.08511900  |
| C | 0.48596800  | 5.77894300  | 2.83631100  |
| C | -1.25700400 | 7.27230100  | 1.25849300  |
| H | -1.78833400 | 5.39217200  | 0.34557100  |
| C | 0.40802300  | 7.16046300  | 3.00268600  |

|    |             |             |             |
|----|-------------|-------------|-------------|
| H  | 1.16183100  | 5.19418900  | 3.45587800  |
| C  | -0.46487100 | 7.91136500  | 2.21285100  |
| H  | -1.94256800 | 7.84977000  | 0.64472100  |
| H  | 1.02370200  | 7.64893300  | 3.75241900  |
| H  | -0.53029000 | 8.98754100  | 2.34461500  |
| C  | -0.77261200 | -1.41966700 | 5.48757300  |
| C  | -0.77805200 | -0.69944800 | 4.30904900  |
| C  | -1.99818000 | -0.38236700 | 3.66692900  |
| C  | -3.23220000 | -0.79287400 | 4.23941600  |
| C  | -3.19202200 | -1.52767700 | 5.44680800  |
| C  | -1.98990500 | -1.83786200 | 6.05695000  |
| C  | -1.98724800 | 0.31410100  | 2.41425500  |
| C  | -4.46604900 | -0.44938500 | 3.54988500  |
| C  | -4.41124200 | 0.24665800  | 2.30274100  |
| C  | -3.12913300 | 0.60318300  | 1.72387600  |
| C  | -5.62726500 | 0.56305800  | 1.65020700  |
| H  | -5.60577200 | 1.09758700  | 0.70793000  |
| C  | -6.85051200 | 0.21121900  | 2.18673600  |
| C  | -6.90357500 | -0.47724900 | 3.40953700  |
| C  | -5.73316000 | -0.79598100 | 4.07104600  |
| H  | -1.00303900 | 0.55020800  | 2.02303000  |
| H  | 0.16853700  | -1.66284300 | 5.97257100  |
| H  | 0.15038300  | -0.37988800 | 3.84415900  |
| H  | -4.11262500 | -1.86365100 | 5.91063000  |
| H  | -1.98886200 | -2.40803900 | 6.98173200  |
| H  | -7.76678300 | 0.46665800  | 1.66245300  |
| H  | -7.86148800 | -0.75839800 | 3.83748900  |
| H  | -5.79739500 | -1.32086200 | 5.01716600  |
| Ni | 1.62880400  | 0.33137400  | -0.46069400 |
| Cl | 1.84318200  | 0.27006400  | 1.94263700  |
| C  | 2.69941400  | -1.32128300 | -1.14493800 |
| O  | 2.36425200  | -1.58674900 | -2.26844800 |
| C  | 3.75378600  | -2.08377400 | -0.42192900 |
| C  | 4.44061000  | -3.05794200 | -1.17184700 |
| C  | 4.07040700  | -1.88979600 | 0.92372200  |
| C  | 5.43551700  | -3.82063700 | -0.57721200 |
| H  | 4.18297100  | -3.19480200 | -2.21623800 |
| C  | 5.06789700  | -2.66478600 | 1.51380600  |
| H  | 3.53943700  | -1.14218500 | 1.49739700  |
| C  | 5.75304900  | -3.62377400 | 0.77064600  |
| H  | 5.97479600  | -4.55874700 | -1.16366100 |
| H  | 5.31242900  | -2.50577800 | 2.55966600  |
| H  | 6.53950300  | -4.21340400 | 1.23330800  |
| C  | 2.89533100  | 1.89748600  | -2.18824600 |

|   |            |             |             |
|---|------------|-------------|-------------|
| C | 3.50586000 | 1.44702000  | -1.01481000 |
| H | 2.35582600 | 2.83252800  | -2.17090200 |
| H | 3.30184700 | 1.58693000  | -3.14431300 |
| H | 3.58552900 | 2.06994700  | -0.13360600 |
| F | 1.33588000 | 0.95493800  | -2.40295500 |
| O | 4.65775900 | 0.64688800  | -1.23625500 |
| C | 5.58402300 | 0.59262400  | -0.25389900 |
| O | 5.49362400 | 1.20067700  | 0.79563000  |
| C | 6.71990900 | -0.29763800 | -0.61480900 |
| C | 7.68307000 | -0.55651600 | 0.36776800  |
| C | 6.84316300 | -0.88168300 | -1.88130100 |
| C | 8.75722300 | -1.39636100 | 0.08883400  |
| H | 7.56295300 | -0.09577500 | 1.34209000  |
| C | 7.92432700 | -1.71521700 | -2.16042800 |
| H | 6.09021000 | -0.68400600 | -2.63481500 |
| C | 8.87952400 | -1.97683200 | -1.17650900 |
| H | 9.49919800 | -1.60015500 | 0.85565500  |
| H | 8.01787700 | -2.16613700 | -3.14433000 |
| H | 9.71912300 | -2.63121000 | -1.39504600 |

**(S)-TS4<sup>doublet</sup>**

|   |             |             |             |
|---|-------------|-------------|-------------|
| C | -1.95093700 | -0.13063300 | 1.45325700  |
| C | -0.92786500 | 0.97457900  | 1.31236400  |
| N | -0.54620300 | -1.80454400 | 0.25375100  |
| N | 0.20142800  | 0.99014200  | 0.70143000  |
| C | -1.68686100 | -1.28822300 | 0.52740400  |
| C | -0.78980600 | -3.04195000 | -0.52279200 |
| C | -2.28522300 | -2.87405300 | -0.94410000 |
| O | -2.77799000 | -1.90784100 | 0.04323300  |
| C | 0.80801000  | 2.33303000  | 0.91378500  |
| C | -0.21553200 | 3.05111300  | 1.87478900  |
| O | -1.30207000 | 2.08388700  | 1.96414500  |
| C | -3.36904700 | 0.46883900  | 1.28263300  |
| H | -3.52741100 | 1.05827100  | 2.17938300  |
| H | -4.08983100 | -0.35568800 | 1.31706200  |
| C | -1.84345300 | -0.79261600 | 2.90592200  |
| H | -2.43588000 | -1.71113600 | 2.84531700  |
| H | -0.80434100 | -1.09795700 | 3.04499600  |
| H | -0.15886500 | -3.02242300 | -1.40929700 |
| H | -2.31264800 | -2.35449300 | -1.90573300 |
| H | 1.73664800  | 2.18016600  | 1.45973100  |
| H | 0.20928300  | 3.11507100  | 2.87838500  |
| C | -0.50082400 | -4.28565500 | 0.28645900  |
| C | -0.08411800 | -6.67418200 | 1.70247700  |

|   |             |             |             |
|---|-------------|-------------|-------------|
| C | -0.66677400 | -4.32732300 | 1.67476300  |
| C | 0.08821500  | -6.63951700 | 0.31710800  |
| C | -0.45706500 | -5.51304100 | 2.38013200  |
| H | -0.94573200 | -3.42583600 | 2.20862000  |
| H | 0.38615100  | -7.53680200 | -0.21773500 |
| H | -0.58577500 | -5.52805200 | 3.45890600  |
| H | 0.07734400  | -7.59830100 | 2.25000800  |
| H | 0.04634300  | 3.51160500  | -3.55746900 |
| C | 0.62907100  | 3.67713900  | -2.65720300 |
| C | 2.10800300  | 4.06416000  | -0.33118400 |
| C | 1.62217700  | 4.65470100  | -2.62359600 |
| C | 2.36447300  | 4.84736800  | -1.45463500 |
| C | 1.10151100  | 3.09184300  | -0.35719500 |
| H | 1.82342200  | 5.26061700  | -3.50288700 |
| H | 3.14551000  | 5.60217700  | -1.42038000 |
| H | 2.69551000  | 4.20103500  | 0.57327600  |
| C | 0.66253800  | 1.86948300  | 5.32518500  |
| C | -0.13854300 | 1.01707400  | 4.59021000  |
| C | -1.52819200 | 0.92075800  | 4.82685500  |
| C | -2.10803800 | 1.72451500  | 5.85772900  |
| C | -1.26233400 | 2.58916900  | 6.58953300  |
| C | 0.09337100  | 2.66538400  | 6.33331700  |
| C | -2.36667600 | 0.01976600  | 4.06524300  |
| C | -3.53425000 | 1.63680900  | 6.13102300  |
| C | -4.31380000 | 0.69900200  | 5.39785100  |
| C | -3.68826900 | -0.09734700 | 4.39063700  |
| C | -5.70050200 | 0.58313200  | 5.64898400  |
| H | -6.27454100 | -0.14087900 | 5.07598600  |
| C | -6.31743600 | 1.37608300  | 6.59525300  |
| C | -5.55382800 | 2.31046300  | 7.32003700  |
| C | -4.19529200 | 2.43514100  | 7.09210200  |
| H | 1.72365600  | 1.90720700  | 5.10620400  |
| H | 0.33323700  | 0.43045900  | 3.81328800  |
| H | -1.67908100 | 3.20575100  | 7.37736700  |
| H | 0.71630000  | 3.33771600  | 6.91658800  |
| H | -4.31541400 | -0.79641700 | 3.84186900  |
| H | -7.38382500 | 1.28333900  | 6.77878100  |
| H | -6.03362100 | 2.94090000  | 8.06313000  |
| H | -3.63846600 | 3.16894500  | 7.66316700  |
| C | 0.36659500  | 2.90291900  | -1.52627400 |
| H | -0.39206000 | 2.13515200  | -1.56498900 |
| C | -0.75288200 | 4.38444200  | 1.44500700  |
| C | -1.71768800 | 4.48171800  | 0.43713700  |
| C | -0.24817000 | 5.54883700  | 2.02789400  |

|   |             |             |             |
|---|-------------|-------------|-------------|
| C | -2.16793100 | 5.72914300  | 0.01523100  |
| H | -2.11691300 | 3.58271800  | -0.01172200 |
| C | -0.69041900 | 6.80095800  | 1.59862800  |
| H | 0.49397800  | 5.47482500  | 2.81949400  |
| C | -1.65147000 | 6.89235500  | 0.59101100  |
| H | -2.91858300 | 5.78607100  | -0.76693100 |
| H | -0.29065800 | 7.70161900  | 2.05623800  |
| H | -2.00010700 | 7.86633300  | 0.25873900  |
| C | -0.11405600 | -5.45168400 | -0.38285200 |
| H | 0.02390300  | -5.42461900 | -1.46010700 |
| C | -3.13018000 | -4.10886800 | -0.96600900 |
| C | -3.25869300 | -4.81205800 | -2.16739800 |
| C | -3.72039400 | -4.61868700 | 0.19466100  |
| C | -3.95424100 | -6.02043900 | -2.20708900 |
| H | -2.80904400 | -4.41212000 | -3.07304900 |
| C | -4.42327900 | -5.82080000 | 0.15354100  |
| H | -3.62655600 | -4.07101400 | 1.12564100  |
| C | -4.53761700 | -6.52770700 | -1.04551900 |
| H | -4.04672300 | -6.55961200 | -3.14549100 |
| H | -4.87978000 | -6.20864300 | 1.05974800  |
| H | -5.08367400 | -7.46626800 | -1.07483200 |
| C | -2.65225900 | 2.79752600  | -4.46910700 |
| C | -2.47729300 | 1.92810100  | -3.41025000 |
| C | -3.19787300 | 2.10492400  | -2.20580000 |
| C | -4.12228000 | 3.17784800  | -2.08370300 |
| C | -4.27285300 | 4.05445400  | -3.18321500 |
| C | -3.55366700 | 3.87149500  | -4.35018300 |
| C | -2.97765900 | 1.22087500  | -1.09773600 |
| C | -4.86291800 | 3.32193700  | -0.83993600 |
| C | -4.63152500 | 2.40748700  | 0.23398600  |
| C | -3.63760400 | 1.35686000  | 0.08773800  |
| C | -5.37950500 | 2.56796200  | 1.42659300  |
| H | -5.24154600 | 1.87962700  | 2.25138000  |
| C | -6.29860300 | 3.58822900  | 1.57607200  |
| C | -6.51107000 | 4.49614100  | 0.52690600  |
| C | -5.80728100 | 4.35661700  | -0.65358400 |
| H | -2.22621000 | 0.45197900  | -1.24333700 |
| H | -2.09211200 | 2.65451300  | -5.38893900 |
| H | -1.76762600 | 1.10918900  | -3.47213500 |
| H | -4.96286900 | 4.88845000  | -3.12368500 |
| H | -3.68901500 | 4.56145600  | -5.17844300 |
| H | -6.85088000 | 3.68498100  | 2.50628800  |
| H | -7.22795100 | 5.30454300  | 0.63852100  |
| H | -5.99333500 | 5.06200700  | -1.45510100 |



|    |            |             |             |
|----|------------|-------------|-------------|
| Ni | 1.15117000 | -0.66890100 | -0.28791500 |
| Cl | 0.02691300 | -0.43592400 | -2.35705400 |
| C  | 2.75680400 | 0.40560200  | -0.92236600 |
| O  | 3.25674100 | 1.13113800  | -0.10755300 |
| C  | 3.18106100 | 0.37150500  | -2.34393900 |
| C  | 3.66220500 | 1.57939100  | -2.87535400 |
| C  | 3.11392300 | -0.78078100 | -3.13389100 |
| C  | 4.06630600 | 1.62945600  | -4.20538200 |
| H  | 3.68343300 | 2.46492900  | -2.25072900 |
| C  | 3.55705100 | -0.72633900 | -4.45285900 |
| H  | 2.72667900 | -1.69457800 | -2.70336400 |
| C  | 4.02134800 | 0.47568300  | -4.99242200 |
| H  | 4.41702900 | 2.56731100  | -4.62666900 |
| H  | 3.52021900 | -1.62067800 | -5.06795600 |
| H  | 4.34428800 | 0.51488900  | -6.02939900 |
| C  | 2.50799500 | -2.65752700 | 0.87831200  |
| C  | 2.34678300 | -1.42840800 | 1.52009700  |
| H  | 3.51128200 | -3.00893700 | 0.66214100  |
| H  | 1.75608500 | -3.41981700 | 1.02589300  |
| H  | 1.57876900 | -1.26081100 | 2.26375000  |
| F  | 2.07687700 | -2.41137200 | -0.84954700 |
| O  | 3.56130900 | -0.75728900 | 1.77564800  |
| C  | 3.53378800 | 0.36269000  | 2.50738300  |
| O  | 2.53116100 | 0.76585700  | 3.08299700  |
| C  | 4.84650300 | 1.05196700  | 2.55133800  |
| C  | 4.95873400 | 2.20585000  | 3.33674900  |
| C  | 5.94819100 | 0.60187700  | 1.81230200  |
| C  | 6.16375800 | 2.90117100  | 3.38923400  |
| H  | 4.09128500 | 2.54396300  | 3.89318700  |
| C  | 7.15231100 | 1.29955000  | 1.86740800  |
| H  | 5.84903700 | -0.28271900 | 1.19484900  |
| C  | 7.26269900 | 2.44805700  | 2.65519300  |
| H  | 6.24752000 | 3.79594700  | 3.99936200  |
| H  | 8.00430800 | 0.95110800  | 1.29095700  |
| H  | 8.20297600 | 2.99095700  | 2.69435600  |

**(R)-TS5<sup>doublet</sup>**

|   |             |             |            |
|---|-------------|-------------|------------|
| C | 0.70465100  | -1.57656300 | 0.72348800 |
| C | 0.78635000  | -0.24727600 | 0.01266400 |
| N | -1.11713400 | -0.72229100 | 2.22124800 |
| N | -0.03651500 | 0.74126500  | 0.02967900 |
| C | -0.16265600 | -1.52605400 | 1.95803300 |
| C | -1.83576500 | -1.23537600 | 3.41318200 |
| C | -0.76792300 | -2.20575000 | 4.01212000 |

|   |             |             |             |
|---|-------------|-------------|-------------|
| O | 0.05026600  | -2.53193900 | 2.84779300  |
| C | 0.55068100  | 1.82363600  | -0.79830100 |
| C | 1.60435900  | 1.04441200  | -1.63901200 |
| O | 1.85776000  | -0.12222200 | -0.78436600 |
| C | 2.14566700  | -2.05210900 | 1.08261000  |
| H | 2.60503800  | -2.38287000 | 0.15806100  |
| H | 2.04467500  | -2.93025900 | 1.72523200  |
| C | -0.01051800 | -2.62826100 | -0.24159500 |
| H | 0.07479300  | -3.59734000 | 0.26098000  |
| H | -1.06677500 | -2.35341700 | -0.27794400 |
| H | -2.03227600 | -0.40136600 | 4.08578400  |
| H | -0.11447400 | -1.63671800 | 4.68745000  |
| H | -0.21309600 | 2.21139000  | -1.47251100 |
| H | 1.10571300  | 0.64816000  | -2.52226700 |
| C | -3.14538300 | -1.90735600 | 3.05768100  |
| C | -5.55013100 | -3.26828600 | 2.58101500  |
| C | -4.31093600 | -1.54412700 | 3.73413700  |
| C | -4.39002700 | -3.62699300 | 1.88927700  |
| C | -5.50997600 | -2.21763300 | 3.49839200  |
| H | -4.28615800 | -0.71063000 | 4.42803300  |
| H | -4.41384600 | -4.43894300 | 1.16729000  |
| H | -6.41256000 | -1.90480900 | 4.01331500  |
| H | -6.48178300 | -3.79537700 | 2.39504400  |
| H | 1.93144500  | 6.22875700  | -0.21632900 |
| C | 1.82057900  | 5.24586400  | 0.23224900  |
| C | 1.50154700  | 2.72616700  | 1.37896300  |
| C | 2.23178200  | 5.02321900  | 1.54844200  |
| C | 2.07020800  | 3.76159900  | 2.12165800  |
| C | 1.09548700  | 2.94249300  | 0.05968200  |
| H | 2.67220700  | 5.83154900  | 2.12576400  |
| H | 2.38723900  | 3.57486900  | 3.14237700  |
| H | 1.37862400  | 1.74935700  | 1.82962600  |
| C | -1.27444300 | -0.08363500 | -3.55207800 |
| C | -0.93051300 | -0.98099500 | -2.55660100 |
| C | 0.20532700  | -1.81854300 | -2.68303500 |
| C | 0.98127000  | -1.75724000 | -3.88285000 |
| C | 0.59926900  | -0.82985600 | -4.88008300 |
| C | -0.49817100 | -0.00189500 | -4.72011800 |
| C | 0.61759200  | -2.70676700 | -1.61144600 |
| C | 2.13538800  | -2.62852700 | -4.04711900 |
| C | 2.44374700  | -3.55680800 | -3.01368700 |
| C | 1.66103200  | -3.56270300 | -1.81678100 |
| C | 3.54916200  | -4.42661500 | -3.15516300 |
| H | 3.76580000  | -5.12711200 | -2.35236100 |

|   |             |             |             |
|---|-------------|-------------|-------------|
| C | 4.34528600  | -4.38479600 | -4.28232900 |
| C | 4.05083800  | -3.46355100 | -5.30447000 |
| C | 2.97068200  | -2.60738800 | -5.18680900 |
| H | -2.13259500 | 0.56389400  | -3.40293400 |
| H | -1.55044700 | -1.01362500 | -1.66790300 |
| H | 1.17309000  | -0.76224900 | -5.79717300 |
| H | -0.76012900 | 0.70335300  | -5.50413500 |
| H | 1.95069000  | -4.25523400 | -1.02948600 |
| H | 5.19414900  | -5.05520900 | -4.38001900 |
| H | 4.67478400  | -3.42257900 | -6.19264500 |
| H | 2.77280800  | -1.90913800 | -5.99187200 |
| C | 1.25660600  | 4.20999700  | -0.50696400 |
| H | 0.92991900  | 4.38623100  | -1.52752400 |
| C | 2.87035300  | 1.72664900  | -2.04817700 |
| C | 3.83676600  | 2.14097600  | -1.12498200 |
| C | 3.06359600  | 1.98839200  | -3.40904800 |
| C | 4.97275100  | 2.81700400  | -1.56053000 |
| H | 3.70409500  | 1.93447900  | -0.07164600 |
| C | 4.19891800  | 2.67242700  | -3.84438200 |
| H | 2.32025700  | 1.64884600  | -4.12589600 |
| C | 5.15549900  | 3.08920700  | -2.91829900 |
| H | 5.71753800  | 3.12612400  | -0.83437300 |
| H | 4.33806500  | 2.87208000  | -4.90316300 |
| H | 6.04262700  | 3.61989700  | -3.25312900 |
| C | -3.19835900 | -2.94476200 | 2.12194800  |
| H | -2.30726100 | -3.22558400 | 1.57373700  |
| C | -1.26566900 | -3.44335200 | 4.69859800  |
| C | -1.87200600 | -3.30684600 | 5.95209600  |
| C | -1.18258800 | -4.70628400 | 4.10965100  |
| C | -2.40067900 | -4.41857800 | 6.60389300  |
| H | -1.94041500 | -2.32461100 | 6.41372400  |
| C | -1.70549500 | -5.82074000 | 4.76641800  |
| H | -0.70989200 | -4.81159800 | 3.14005900  |
| C | -2.31850200 | -5.68053200 | 6.01133700  |
| H | -2.87588000 | -4.30000600 | 7.57330100  |
| H | -1.63631200 | -6.79970300 | 4.30064400  |
| H | -2.72894800 | -6.54864700 | 6.51886400  |
| C | 3.41246700  | 2.19451500  | 5.43944700  |
| C | 2.76737600  | 1.14803000  | 4.81081800  |
| C | 3.28715700  | 0.58308000  | 3.62380200  |
| C | 4.49354500  | 1.08728300  | 3.06753700  |
| C | 5.12833300  | 2.16319300  | 3.72918200  |
| C | 4.60286200  | 2.70586800  | 4.88790500  |
| C | 2.59081100  | -0.47106500 | 2.95680200  |

|    |             |             |             |
|----|-------------|-------------|-------------|
| C  | 5.00217400  | 0.48194800  | 1.84659100  |
| C  | 4.24501400  | -0.53458800 | 1.18121200  |
| C  | 3.00043900  | -0.99908400 | 1.76581400  |
| C  | 4.74970200  | -1.06070900 | -0.03357400 |
| H  | 4.18019400  | -1.79772200 | -0.58437600 |
| C  | 5.95265500  | -0.63945500 | -0.56180400 |
| C  | 6.70996100  | 0.33411000  | 0.10892500  |
| C  | 6.23642700  | 0.88216800  | 1.28444000  |
| H  | 1.69247900  | -0.84345300 | 3.43452900  |
| H  | 3.00223800  | 2.62585500  | 6.34771700  |
| H  | 1.83982100  | 0.74957100  | 5.21457900  |
| H  | 6.03759900  | 2.59060900  | 3.32271600  |
| H  | 5.11045400  | 3.53559000  | 5.37122400  |
| H  | 6.30492400  | -1.05704300 | -1.50003900 |
| H  | 7.66055400  | 0.66446200  | -0.29936200 |
| H  | 6.83445300  | 1.63303800  | 1.78753100  |
| Ni | -1.77582800 | 0.89061100  | 1.00374600  |
| Cl | -3.33549700 | 1.50709400  | 2.48683900  |
| C  | -2.40799500 | 2.18718400  | -0.23116100 |
| O  | -2.94246000 | 1.79585700  | -1.25638500 |
| C  | -2.16104600 | 3.65657600  | -0.03017000 |
| C  | -2.30072500 | 4.50570900  | -1.13905800 |
| C  | -1.74665900 | 4.18523800  | 1.19673400  |
| C  | -2.03675400 | 5.86699000  | -1.01958500 |
| H  | -2.62227600 | 4.07376700  | -2.08169200 |
| C  | -1.49430500 | 5.55004900  | 1.31802400  |
| H  | -1.64335200 | 3.52616000  | 2.04936000  |
| C  | -1.63721300 | 6.39163000  | 0.21387300  |
| H  | -2.14186300 | 6.52029700  | -1.88199800 |
| H  | -1.17345400 | 5.95443100  | 2.27316700  |
| H  | -1.43076800 | 7.45435300  | 0.30995700  |
| C  | -5.31073400 | -0.56435100 | 0.23232500  |
| H  | -5.67914700 | -1.09133500 | 1.10082600  |
| O  | -5.59367800 | 0.75984800  | 0.16745800  |
| C  | -6.32168200 | 1.31274000  | 1.20388900  |
| O  | -6.87864300 | 0.63544700  | 2.03927600  |
| C  | -6.33558900 | 2.78841800  | 1.13318700  |
| C  | -7.07688200 | 3.47599100  | 2.10365300  |
| C  | -5.60321400 | 3.49985900  | 0.17353700  |
| C  | -7.08417000 | 4.86699400  | 2.11649400  |
| H  | -7.62542600 | 2.90163200  | 2.84221800  |
| C  | -5.60601600 | 4.89242200  | 0.19804000  |
| H  | -5.01980700 | 2.96349400  | -0.56327500 |
| C  | -6.34445500 | 5.57636100  | 1.16568800  |

|   |             |             |             |
|---|-------------|-------------|-------------|
| H | -7.65617000 | 5.39953800  | 2.87100000  |
| H | -5.01078300 | 5.44117900  | -0.52450200 |
| H | -6.33884700 | 6.66296800  | 1.18375200  |
| C | -4.47720300 | -1.10540100 | -0.72525600 |
| H | -4.42861500 | -2.18428700 | -0.78520700 |
| H | -4.27246500 | -0.53453100 | -1.62109300 |
| F | -2.72369700 | -0.94286600 | -0.09495600 |

(S)-TS5<sup>doublet</sup>

|   |             |             |             |
|---|-------------|-------------|-------------|
| C | -1.88779900 | -0.22112200 | 0.95153200  |
| C | -1.04275800 | 1.02606100  | 0.88869800  |
| N | -0.31985200 | -1.40104600 | -0.60300700 |
| N | 0.14260600  | 1.17272700  | 0.40965200  |
| C | -1.48134500 | -1.22475900 | -0.09984400 |
| C | -0.33977000 | -2.69117100 | -1.34095400 |
| C | -1.86898300 | -2.87982000 | -1.56525000 |
| O | -2.44201800 | -2.11441800 | -0.46163300 |
| C | 0.48759100  | 2.61513400  | 0.53288100  |
| C | -0.52191600 | 3.08687300  | 1.61577600  |
| O | -1.60199200 | 2.10250400  | 1.45765800  |
| C | -3.39389400 | 0.15436000  | 0.81585400  |
| H | -3.69861700 | 0.57289500  | 1.76775500  |
| H | -3.94718200 | -0.77896500 | 0.68511600  |
| C | -1.61769900 | -0.94043900 | 2.35363300  |
| H | -2.34897500 | -1.75311000 | 2.41905600  |
| H | -0.62145800 | -1.38082600 | 2.29380100  |
| H | 0.18940500  | -2.56466600 | -2.28406300 |
| H | -2.15821800 | -2.34503000 | -2.48064400 |
| H | 1.49288700  | 2.71038100  | 0.93772000  |
| H | -0.08856100 | 2.87804700  | 2.59326400  |
| C | 0.30477800  | -3.80739700 | -0.54525600 |
| C | 1.42173000  | -5.97236700 | 0.84647500  |
| C | -0.14545600 | -4.13573700 | 0.73766800  |
| C | 1.88106800  | -5.64634300 | -0.42974900 |
| C | 0.40385000  | -5.21337700 | 1.42813000  |
| H | -0.93010700 | -3.55122800 | 1.20346900  |
| H | 2.67913700  | -6.22366700 | -0.88750600 |
| H | 0.03885700  | -5.45938000 | 2.42164900  |
| H | 1.85513900  | -6.80949300 | 1.38643500  |
| H | -1.25255500 | 3.23336500  | -3.77563000 |
| C | -0.57410400 | 3.58576500  | -3.00560300 |
| C | 1.15380500  | 4.47610800  | -1.00687800 |
| C | 0.18293100  | 4.74087200  | -3.20334900 |
| C | 1.04995100  | 5.18317600  | -2.20162100 |

|   |             |             |             |
|---|-------------|-------------|-------------|
| C | 0.39700300  | 3.31928300  | -0.80124400 |
| H | 0.10195800  | 5.29208100  | -4.13624200 |
| H | 1.65313100  | 6.07329700  | -2.35426300 |
| H | 1.83746500  | 4.81289400  | -0.23311200 |
| C | 1.71194800  | 1.34490500  | 4.03268600  |
| C | 0.66369000  | 0.55668600  | 3.59105500  |
| C | -0.66497900 | 0.78277500  | 4.02664300  |
| C | -0.91644800 | 1.83645500  | 4.96085200  |
| C | 0.17678200  | 2.62334000  | 5.39148400  |
| C | 1.46344800  | 2.39074200  | 4.93688800  |
| C | -1.77615500 | -0.01005600 | 3.53193100  |
| C | -2.27081200 | 2.08084500  | 5.43301500  |
| C | -3.31044100 | 1.20520700  | 5.01222800  |
| C | -3.01756400 | 0.16792900  | 4.07226400  |
| C | -4.63208400 | 1.40910300  | 5.47108500  |
| H | -5.41013100 | 0.72732600  | 5.13623000  |
| C | -4.93611600 | 2.45921900  | 6.31456900  |
| C | -3.91497900 | 3.33675600  | 6.72387100  |
| C | -2.61414800 | 3.14864800  | 6.29256300  |
| H | 2.71338800  | 1.15110200  | 3.66228600  |
| H | 0.89322800  | -0.23516300 | 2.88964000  |
| H | 0.01325700  | 3.42261300  | 6.10537600  |
| H | 2.28099100  | 3.01367100  | 5.28889100  |
| H | -3.84323500 | -0.45812400 | 3.74126000  |
| H | -5.95568400 | 2.61076700  | 6.65676000  |
| H | -4.14805900 | 4.16936900  | 7.38134800  |
| H | -1.85264100 | 3.84706800  | 6.61969600  |
| C | -0.46401300 | 2.87713300  | -1.80890400 |
| H | -1.05251300 | 1.97995500  | -1.66217100 |
| C | -1.03150200 | 4.49161500  | 1.58698700  |
| C | -1.84299500 | 4.97926200  | 0.55658100  |
| C | -0.64228400 | 5.35055700  | 2.62081900  |
| C | -2.24831400 | 6.31086100  | 0.55986600  |
| H | -2.16025000 | 4.32094800  | -0.24094500 |
| C | -1.04173400 | 6.68707800  | 2.61875100  |
| H | -0.02698400 | 4.96379700  | 3.42915600  |
| C | -1.84592900 | 7.16925700  | 1.58568200  |
| H | -2.88532400 | 6.67430200  | -0.24011900 |
| H | -0.73197100 | 7.34599700  | 3.42501200  |
| H | -2.16275100 | 8.20867100  | 1.58201600  |
| C | 1.32161800  | -4.57081500 | -1.12119300 |
| H | 1.69509800  | -4.30285600 | -2.10362600 |
| C | -2.39887700 | -4.28341600 | -1.59380000 |
| C | -2.03687600 | -5.10578300 | -2.66684600 |

|    |             |             |             |
|----|-------------|-------------|-------------|
| C  | -3.20881400 | -4.79536200 | -0.57882300 |
| C  | -2.47196400 | -6.42773200 | -2.71885000 |
| H  | -1.40385000 | -4.71286900 | -3.45883800 |
| C  | -3.64890400 | -6.11865100 | -0.63465900 |
| H  | -3.49105600 | -4.15811000 | 0.25119800  |
| C  | -3.28047100 | -6.93850300 | -1.70080800 |
| H  | -2.17948600 | -7.05906400 | -3.55280700 |
| H  | -4.27888900 | -6.50839700 | 0.15985400  |
| H  | -3.62097600 | -7.96906700 | -1.74060700 |
| C  | -3.48723100 | 2.02241700  | -5.11045200 |
| C  | -3.34039800 | 1.17437900  | -4.03073400 |
| C  | -3.67904500 | 1.59614100  | -2.72461100 |
| C  | -4.18925800 | 2.90575900  | -2.51252800 |
| C  | -4.32183100 | 3.75387300  | -3.63556900 |
| C  | -3.97930000 | 3.32565700  | -4.90534500 |
| C  | -3.48156200 | 0.72779600  | -1.60716300 |
| C  | -4.53370800 | 3.30809100  | -1.15777100 |
| C  | -4.26633800 | 2.42902300  | -0.06065200 |
| C  | -3.71383700 | 1.11153000  | -0.31730800 |
| C  | -4.56512000 | 2.87919200  | 1.24927900  |
| H  | -4.32875500 | 2.26062900  | 2.10496500  |
| C  | -5.13005800 | 4.11645600  | 1.47912000  |
| C  | -5.42452600 | 4.96386700  | 0.39887900  |
| C  | -5.12503600 | 4.56440800  | -0.88841200 |
| H  | -3.12477200 | -0.27442500 | -1.81642800 |
| H  | -3.21870700 | 1.69128100  | -6.10924200 |
| H  | -2.94925100 | 0.16912800  | -4.16780300 |
| H  | -4.68311200 | 4.76786200  | -3.50996400 |
| H  | -4.08682500 | 4.00233800  | -5.74808600 |
| H  | -5.33560500 | 4.43279700  | 2.49716600  |
| H  | -5.87539000 | 5.93624200  | 0.57388500  |
| H  | -5.35799500 | 5.23248700  | -1.70935400 |
| Ni | 1.31931000  | -0.23149400 | -0.29645900 |
| Cl | 2.67848300  | -1.49385000 | -1.56297700 |
| C  | 2.80330200  | 0.88441000  | 0.02925200  |
| O  | 3.24833400  | 0.94264900  | 1.16283800  |
| C  | 3.33805900  | 1.79292800  | -1.03739400 |
| C  | 4.32591500  | 2.72362800  | -0.68528400 |
| C  | 2.83355200  | 1.77900900  | -2.34240200 |
| C  | 4.80619300  | 3.62581300  | -1.62880200 |
| H  | 4.71352800  | 2.70734700  | 0.32737900  |
| C  | 3.30886700  | 2.68741000  | -3.28470100 |
| H  | 2.07270800  | 1.05485300  | -2.60704300 |
| C  | 4.29496900  | 3.61062900  | -2.92989500 |

|   |            |             |             |
|---|------------|-------------|-------------|
| H | 5.58166100 | 4.33596700  | -1.35471400 |
| H | 2.90382100 | 2.68235900  | -4.29222300 |
| H | 4.66459000 | 4.31933100  | -3.66666200 |
| C | 2.68986900 | -2.66289200 | 2.02383200  |
| C | 3.74126700 | -1.93488900 | 2.56838500  |
| H | 2.83288000 | -3.10302200 | 1.04396600  |
| H | 2.05907000 | -3.21453100 | 2.70868700  |
| F | 1.47176200 | -1.49576100 | 1.49247800  |
| O | 4.66983700 | -1.45833000 | 1.69862100  |
| C | 5.48794800 | -0.42939200 | 2.09799900  |
| O | 5.55036100 | -0.04979100 | 3.24849700  |
| C | 6.24660200 | 0.12266400  | 0.95501900  |
| C | 5.99898900 | -0.28326100 | -0.36412000 |
| C | 7.18915400 | 1.12606900  | 1.21816100  |
| C | 6.69682500 | 0.31655100  | -1.40963200 |
| H | 5.23535900 | -1.02386100 | -0.57062100 |
| C | 7.88559000 | 1.71727000  | 0.16816000  |
| H | 7.35149200 | 1.43082800  | 2.24663100  |
| C | 7.63845700 | 1.31303500  | -1.14748200 |
| H | 6.48151000 | 0.02129300  | -2.43187500 |
| H | 8.61575500 | 2.49557300  | 0.37175100  |
| H | 8.17234800 | 1.78420300  | -1.96824700 |
| H | 3.78830300 | -1.55110600 | 3.57914600  |
